# Supplementary material for: Global Gene-Expression Analysis to Identify Differentially Expressed Genes Critical for the Heat Stress Response in Brassica rapa
Source: PLoS One. 2015 Jun 23;10(6):e0130451. doi: 10.1371/journal.pone.0130451 (PMC4477974; doi:10.1371/journal.pone.0130451)
Supplement: S7 Table — Leaf discs were prepared from 4 week old plants at 22°C and subjected to 45°C for the indicated time. Probe values are the means of two independent experiments. (XLSX) [file pone.0130451.s009.xlsx]

## Sheet: S7 Table
S7 Table Summary of genes down-regulated over 2-fold by HS in Kenshin. Leaf discs were prepared from 4 week old plants at 22°C and subjected to 45°C for indicated time. Probe values were mean of values from two independent experiments.
			Probe intensity (PI) value												Fold changes
			Chiifu						Kenshin						Chiifu					Kenshin
Br_SEQ_ID	At Locus	A_thaliana_homologue_Description	0	0.5	1	2	3	4	0	0.5	1	2	3	4h	C0.5	C1	C2	C3	C4	K0.5	K1	K2	K3	K4
Bra020462	AT5G57150.1	Symbols: | basic helix-loop-helix (bHLH) DNA-binding superfamily protein | chr5:23152361-23154872 FORWARD LENGTH=247	4216.35	1306.04	2194.69	2221.95	2563.93	2712.61	2947.07	1253.33	2062.03	2366.29	2157.89	2227.15	-3.22835	-1.92116	-1.89759	-1.64449	-1.55435	-2.35139	-1.42921	-1.24544	-1.36572	-1.32325
Bra029944	AT3G49240.1	Symbols: emb1796 | Pentatricopeptide repeat (PPR) superfamily protein | chr3:18256086-18257975 FORWARD LENGTH=629	5262.37	2424.91	3029.38	3496.84	3659.05	3311.17	5447.05	2113.62	3521.37	3512.29	3813.13	3865.72	-2.17013	-1.73711	-1.50489	-1.43818	-1.58928	-2.57712	-1.54686	-1.55085	-1.4285	-1.40906
Bra025691	AT1G18850.1	Symbols: | unknown protein; FUNCTIONS IN: molecular_function unknown; INVOLVED IN: biological_process unknown; LOCATED IN: nucleolus; EXPRESSED IN: 22 plant structures; EXPRESSED DURING: 13 growth stages; Has 40 Blast hits to 40 proteins in 13 species: Archae - 0; Bacteria - 0; Metazoa - 0; Fungi - 0; Plants - 40; Viruses - 0; Other Eukaryotes - 0 (source: NCBI BLink). | chr1:6504928-6506127 REVE…	1600.36	613.897	604.201	831.4	1032.38	1070.92	1531.76	571.835	825.998	800.655	850.526	1175.02	-2.60689	-2.64872	-1.9249	-1.55017	-1.49438	-2.67867	-1.85444	-1.91313	-1.80096	-1.3036
Bra031853	AT5G65590.1	Symbols: | Dof-type zinc finger DNA-binding family protein | chr5:26212084-26213034 REVERSE LENGTH=316	802.714	309.978	385.83	718.506	804.053	1227.34	527.831	259.812	312.118	369.678	334.35	586.616	-2.58958	-2.08049	-1.1172	1.00167	1.52899	-2.03159	-1.69113	-1.42781	-1.57868	1.11137
Bra039426	AT3G46950.1	Symbols: | Mitochondrial transcription termination factor family protein | chr3:17289452-17290804 FORWARD LENGTH=450	3244.02	1421.65	1361.81	1745.3	1933.2	2019.43	4002.16	1632.59	2106.82	2069.34	2027.9	2115.1	-2.28187	-2.38214	-1.85872	-1.67806	-1.6064	-2.45142	-1.89962	-1.93403	-1.97355	-1.89218
Bra015786	AT1G76120.1	Symbols: | Pseudouridine synthase family protein | chr1:28558813-28560294 REVERSE LENGTH=463	1101.13	498.94	367.368	606.863	756.654	781.932	816.896	351.331	526.302	470.992	440.207	567.848	-2.20694	-2.99735	-1.81446	-1.45526	-1.40822	-2.32515	-1.55214	-1.73442	-1.85571	-1.43858
Bra027789	AT1G63780.1	Symbols: IMP4 | Ribosomal RNA processing Brix domain protein | chr1:23665045-23667243 REVERSE LENGTH=294	2928.6	1413.79	1449.57	1585.84	1854.43	1812.16	567.182	208.97	369.424	362.748	374.247	464.537	-2.07145	-2.02032	-1.84672	-1.57925	-1.61608	-2.71418	-1.53531	-1.56357	-1.51553	-1.22096
Bra027750	NA	NA	1582.25	672.908	697.794	728.887	804.314	1084.07	1596.08	720.636	808.501	1013.06	1141.81	1264.19	-2.35136	-2.2675	-2.17078	-1.9672	-1.45955	-2.21482	-1.97412	-1.5755	-1.39785	-1.26253
Bra023836	AT3G22330.1	Symbols: PMH2, ATRH53 | putative mitochondrial RNA helicase 2 | chr3:7892641-7895145 FORWARD LENGTH=616	5780.23	2623.73	2889.14	2871.21	2971.6	2906.36	5257.11	2604.49	3404.51	3691.19	3021.97	3183.84	-2.20306	-2.00067	-2.01317	-1.94516	-1.98882	-2.01848	-1.54416	-1.42423	-1.73963	-1.65119
Bra015693	AT1G77120.1	Symbols: ADH1, ADH, ATADH, ATADH1 | alcohol dehydrogenase 1 | chr1:28975509-28977216 FORWARD LENGTH=379	5074.64	830.214	958.299	777.317	990.835	702.719	6972.71	3434.5	4090.53	3909.88	3987.93	3578.37	-6.11245	-5.29547	-6.5284	-5.12158	-7.22144	-2.0302	-1.7046	-1.78336	-1.74845	-1.94857
Bra015346	AT1G04770.1	Symbols: | Tetratricopeptide repeat (TPR)-like superfamily protein | chr1:1336564-1337767 REVERSE LENGTH=303	4657.46	1336.75	1890.65	1440.97	1697.06	1364.42	4042.9	1931.79	2355.68	2741.83	2307.07	2151.95	-3.48417	-2.46342	-3.23217	-2.74443	-3.41351	-2.09283	-1.71623	-1.47453	-1.7524	-1.87871
Bra011552	AT4G34680.1	Symbols: GATA3 | GATA transcription factor 3 | chr4:16553700-16554610 FORWARD LENGTH=269	665.554	220.98	230.868	170.155	174.553	164.141	625.244	245.58	479.323	378.563	389.942	409.286	-3.01183	-2.88283	-3.91146	-3.8129	-4.05477	-2.54599	-1.30443	-1.65162	-1.60343	-1.52765
Bra029069	AT5G53420.1	Symbols: | CCT motif family protein | chr5:21673683-21675469 FORWARD LENGTH=264	7450.89	2489.13	2636.33	2209.54	2791.19	2545.96	4991.65	2435.91	2889.67	2580.89	2727.1	2982.17	-2.99337	-2.82624	-3.37215	-2.66943	-2.92655	-2.04919	-1.72741	-1.93408	-1.83039	-1.67383
Bra034696	AT3G13230.1	Symbols: | RNA-binding KH domain-containing protein | chr3:4270423-4271070 FORWARD LENGTH=215	1393.3	525.683	519.517	505.034	625.5	509.499	2283.63	1118.94	1547.43	1647	1448.65	1548.7	-2.65046	-2.68191	-2.75882	-2.2275	-2.73465	-2.04089	-1.47576	-1.38654	-1.57638	-1.47455
Bra002843	AT5G56140.1	Symbols: | RNA-binding KH domain-containing protein | chr5:22725462-22727932 FORWARD LENGTH=315	2397.84	1453.47	1139.34	1709.72	1941.14	2414.04	3086.11	1528.4	2339.62	2308.06	2303.23	1962.15	-1.64973	-2.10459	-1.40248	-1.23527	1.00676	-2.01918	-1.31906	-1.3371	-1.33991	-1.57282
Bra034644	AT4G34680.1	Symbols: GATA3 | GATA transcription factor 3 | chr4:16553700-16554610 FORWARD LENGTH=269	735.851	383.349	346.895	341.053	344.08	228.859	887.45	438.294	446.255	511.743	480.44	606.968	-1.91953	-2.12125	-2.15759	-2.1386	-3.2153	-2.02478	-1.98866	-1.73417	-1.84716	-1.4621
Bra001058	AT3G02650.1	Symbols: | Tetratricopeptide repeat (TPR)-like superfamily protein | chr3:568135-569865 FORWARD LENGTH=576	626.221	455.026	337.844	311.311	560.589	346.581	636.149	290.03	480.933	410.683	544.988	372.403	-1.37623	-1.85358	-2.01156	-1.11708	-1.80685	-2.19339	-1.32274	-1.549	-1.16727	-1.70823
Bra010710	NA	NA	4563.31	3567.94	2663.55	1846.01	1637.21	1307.89	521.664	211.386	304.814	281.253	510.214	491.981	-1.27898	-1.71324	-2.47199	-2.78725	-3.48906	-2.46783	-1.71142	-1.85479	-1.02244	-1.06033
Bra029308	AT5G61790.1	Symbols: CNX1, ATCNX1 | calnexin 1 | chr5:24827394-24829642 REVERSE LENGTH=530	20389.5	10646.5	10248.3	10140.9	9495.9	10039.9	22957.5	11215.4	13791.4	14246.9	13962.1	14282.4	-1.91514	-1.98955	-2.01062	-2.14719	-2.03085	-2.04696	-1.66462	-1.6114	-1.64427	-1.6074
Bra015377	AT1G04990.1	Symbols: | Zinc finger C-x8-C-x5-C-x3-H type family protein | chr1:1419368-1421454 REVERSE LENGTH=404	656.662	172.241	317.645	209.876	338.874	275.369	520.479	226.997	317.338	617.128	410.087	410.873	-3.81246	-2.06728	-3.12881	-1.93778	-2.38466	-2.29289	-1.64014	1.18569	-1.26919	-1.26676
Bra001474	AT3G12860.1	Symbols: | NOP56-like pre RNA processing ribonucleoprotein | chr3:4091678-4093921 FORWARD LENGTH=499	460.349	267.263	224.293	237.984	250.841	267.729	642.969	254.609	384.826	457.087	449.669	509.568	1	1	1	1	1	-2.52532	-1.6708	-1.40667	-1.42987	-1.26179
Bra009902	NA	NA	587.331	564.655	587.067	497.748	610.886	903.748	795.202	322.826	449.089	577.487	671.475	405.146	-1.04016	-1.00045	-1.17998	1.04011	1.53874	-2.46325	-1.7707	-1.377	-1.18426	-1.96275
Bra031587	AT1G07615.1	Symbols: | GTP-binding protein Obg/CgtA | chr1:2342277-2344200 REVERSE LENGTH=493	4183.47	2660.45	3681.89	3087.73	3617.11	2158.83	1848.9	756.312	1713.96	1518.13	1391.44	989.001	-1.57247	-1.13623	-1.35487	-1.15658	-1.93784	-2.44463	-1.07873	-1.21788	-1.32877	-1.86946
Bra035885	AT5G62680.1	Symbols: | Major facilitator superfamily protein | chr5:25165430-25167822 REVERSE LENGTH=616	6159.05	6053.38	3434.13	5322.83	3849.92	5289.39	1836.58	771.63	1219.04	1340.34	1633.33	1473.4	-1.01746	-1.79348	-1.1571	-1.59979	-1.16442	-2.38013	-1.50658	-1.37023	-1.12444	-1.24649
Bra032831	AT1G27470.1	Symbols: | transducin family protein / WD-40 repeat family protein | chr1:9540368-9544218 REVERSE LENGTH=810	2525.6	1576.32	1727.43	1613.13	1887.13	1812.47	2841.36	1200.82	1932.47	2029.93	2325.28	2468.59	-1.60221	-1.46206	-1.56565	-1.33833	-1.39346	-2.36618	-1.47033	-1.39973	-1.22194	-1.15101
Bra032807	AT1G24400.1	Symbols: LHT2, AATL2, ATLHT2 | lysine histidine transporter 2 | chr1:8651563-8653561 REVERSE LENGTH=441	197.015	282.236	173.564	298.801	353.118	472.628	572.838	244.853	458.705	350.868	386.83	386.784	1	1	1	1	1	-2.33952	-1.24882	-1.63263	-1.48085	-1.48103
Bra036804	AT4G23160.1	Symbols: CRK8 | cysteine-rich RLK (RECEPTOR-like protein kinase) 8 | chr4:12129485-12134086 FORWARD LENGTH=1262	292.145	286.868	285.691	281.922	309.694	239.219	518.06	226.73	343.507	273.014	420.988	294.469	1	1	1	1	1	-2.28492	-1.50815	-1.89756	-1.23058	-1.7593
Bra002656	AT5G58370.2	Symbols: | P-loop containing nucleoside triphosphate hydrolases superfamily protein | chr5:23593358-23595645 FORWARD LENGTH=465	814.865	345.589	264.795	367.376	502.372	365.235	710.08	320.284	396.922	396.304	397.214	614.2	-2.3579	-3.07734	-2.21807	-1.62204	-2.23107	-2.21703	-1.78897	-1.79176	-1.78765	-1.15611
Bra031491	AT1G60640.1	Symbols: | unknown protein; Has 42416 Blast hits to 22533 proteins in 1340 species: Archae - 32; Bacteria - 6461; Metazoa - 16431; Fungi - 3749; Plants - 1747; Viruses - 284; Other Eukaryotes - 13712 (source: NCBI BLink). | chr1:22337534-22339513 REVERSE LENGTH=340	2302.9	1424.03	1359.05	1336.75	1555.78	1617.79	1113.46	491.662	654.477	812.058	788.976	892.302	-1.61717	-1.69449	-1.72276	-1.48022	-1.42349	-2.26469	-1.7013	-1.37116	-1.41127	-1.24785
Bra006665	AT5G60340.1	Symbols: | P-loop containing nucleoside triphosphate hydrolases superfamily protein | chr5:24275098-24275891 REVERSE LENGTH=178	2282.89	976.229	1176.53	1097.46	1274.98	1256.16	2585.64	1180.08	1580.96	1493.33	1356.48	1647.85	-2.33848	-1.94036	-2.08016	-1.79053	-1.81736	-2.19107	-1.63549	-1.73146	-1.90614	-1.5691
Bra040330	AT2G44990.1	Symbols: CCD7, MAX3, ATCCD7 | carotenoid cleavage dioxygenase 7 | chr2:18558938-18561621 FORWARD LENGTH=629	3455.79	3541.52	3537.35	4089.97	4557.02	4508.52	4357.5	1942.01	3849.59	4005.12	4068.63	4992.79	1.02481	1.0236	1.18351	1.31866	1.30463	-2.24381	-1.13194	-1.08798	-1.071	1.14579
Bra030345	AT2G04650.1	Symbols: | ADP-glucose pyrophosphorylase family protein | chr2:1621986-1624486 REVERSE LENGTH=406	973.645	764.588	804.449	731.791	1180.58	642.119	1633.68	732.809	1236.53	1153.67	1289.21	1223.51	-1.27342	-1.21033	-1.3305	1.21254	-1.5163	-2.22934	-1.32118	-1.41607	-1.26719	-1.33524
Bra024483	AT2G17990.1	Symbols: | BEST Arabidopsis thaliana protein match is: kinectin-related (TAIR:AT5G66250.3); Has 7578 Blast hits to 6129 proteins in 783 species: Archae - 220; Bacteria - 1045; Metazoa - 3605; Fungi - 575; Plants - 442; Viruses - 38; Other Eukaryotes - 1653 (source: NCBI BLink). | chr2:7827480-7828596 FORWARD LENGTH=338	1244.45	765.782	796.594	802.524	848.144	847.396	2434.42	1094.81	1564.42	1581.69	1539.93	1262.9	-1.62507	-1.56221	-1.55067	-1.46726	-1.46856	-2.2236	-1.55612	-1.53913	-1.58086	-1.92764
Bra014382	AT3G62930.1	Symbols: | Thioredoxin superfamily protein | chr3:23261538-23261846 REVERSE LENGTH=102	214.655	237.745	422.933	369.543	391.728	452.081	887.664	400.628	606.992	529.99	679.014	665.655	1	1	1	1	1	-2.21568	-1.4624	-1.67487	-1.30728	-1.33352
Bra018882	AT3G20570.1	Symbols: ENODL9, AtENODL9 | early nodulin-like protein 9 | chr3:7186754-7187453 REVERSE LENGTH=203	1734.71	1730.5	1171.93	1281.37	1698.57	1510.62	905.988	408.993	944.76	1196.15	1314.36	642.146	-1.00243	-1.48022	-1.35379	-1.02128	-1.14834	-2.21517	1.0428	1.32027	1.45075	-1.41088
Bra015247	AT2G15910.2	Symbols: | CSL zinc finger domain-containing protein | chr2:6935088-6935333 REVERSE LENGTH=81	1236.25	1227.97	1521.82	1274.59	1162.26	1437.47	1788.44	814.767	1587.66	1682.05	1710.35	1495.78	-1.00674	1.231	1.03101	-1.06366	1.16277	-2.19503	-1.12646	-1.06325	-1.04566	-1.19566
Bra021786	AT2G31470.1	Symbols: DOR | F-box and associated interaction domains-containing protein | chr2:13407492-13408655 REVERSE LENGTH=387	189.093	278.378	274.061	249.248	324.55	365.305	571.911	261.794	334.148	327.315	341.768	319.63	1	1	1	1	1	-2.18458	-1.71155	-1.74728	-1.67339	-1.78929
Bra017582	AT5G46050.1	Symbols: ATPTR3, PTR3 | peptide transporter 3 | chr5:18675062-18679071 REVERSE LENGTH=582	306.829	493.206	1729.41	766.018	633.995	1152.92	1166.7	536.73	890.831	821.35	906.633	1182.83	1	5.6364	2.49656	2.06628	3.75753	-2.17372	-1.30968	-1.42047	-1.28685	1.01383
Bra003270	AT3G57150.1	Symbols: NAP57, AtNAP57, CBF5, AtCBF5 | homologue of NAP57 | chr3:21154255-21155952 REVERSE LENGTH=565	2103.49	1077.5	1255.72	1512.44	1639.79	1821.75	2451.02	1132.39	1663.43	1526.54	1738.3	2237.09	-1.95219	-1.67513	-1.39079	-1.28278	-1.15465	-2.16447	-1.47347	-1.6056	-1.41001	-1.09563
Bra008203	AT1G75520.1	Symbols: SRS5 | SHI-related sequence 5 | chr1:28351779-28353179 REVERSE LENGTH=346	201.331	249.467	368.922	464.684	335.31	584.822	574.81	265.859	345.384	322.072	405.506	507.102	1	1	1	1	2.90478	-2.16209	-1.66426	-1.78473	-1.41751	-1.13352
Bra024455	AT1G12500.1	Symbols: | Nucleotide-sugar transporter family protein | chr1:4263542-4264957 REVERSE LENGTH=361	4077.87	3476.07	4427.73	4021.71	3613.85	4618.99	4438.49	2080.01	3302.66	3600.78	2984.79	2851.31	-1.17313	1.08579	-1.01396	-1.1284	1.1327	-2.13388	-1.34391	-1.23265	-1.48704	-1.55665
Bra017093	AT2G38940.1	Symbols: ATPT2, PHT1;4 | phosphate transporter 1;4 | chr2:16258500-16260104 FORWARD LENGTH=534	2629.41	1226.06	1263.38	1478.58	1118.81	1171.13	1962.09	823.396	1117.31	1674.52	982.488	1268.76	-2.1446	-2.08125	-1.77833	-2.35018	-2.24519	-2.38292	-1.75608	-1.17173	-1.99706	-1.54646
Bra017617	AT4G33970.1	Symbols: | Leucine-rich repeat (LRR) family protein | chr4:16279795-16281894 REVERSE LENGTH=699	436.793	1125.6	1269.02	1397.06	1244.45	1538.97	2298.43	1083.43	1678.68	1494.55	1429.78	1224.5	2.57696	2.90531	3.19845	2.84906	3.52334	-2.12144	-1.36919	-1.53787	-1.60754	-1.87704
Bra011994	AT2G27830.1	Symbols: | unknown protein; BEST Arabidopsis thaliana protein match is: unknown protein (TAIR:AT4G22758.1); Has 131 Blast hits to 131 proteins in 17 species: Archae - 0; Bacteria - 0; Metazoa - 0; Fungi - 0; Plants - 131; Viruses - 0; Other Eukaryotes - 0 (source: NCBI BLink). | chr2:11860734-11861306 FORWARD LENGTH=190	8981.11	4195.08	4528.64	3919.93	4572.99	3361.71	8663.46	4252.33	4711.81	5095.97	5180.33	4550.95	-2.14087	-1.98318	-2.29114	-1.96395	-2.67159	-2.03734	-1.83867	-1.70006	-1.67238	-1.90366
Bra016179	AT1G70830.1	Symbols: MLP28 | MLP-like protein 28 | chr1:26710203-26711395 REVERSE LENGTH=335	257.012	178.48	164.796	189.544	190.812	236.662	581.924	276.288	349.521	371.181	334.479	434.164	1	1	1	1	1	-2.10622	-1.66492	-1.56776	-1.73979	-1.34033
Bra011984	NA	NA	204.994	228.777	272.508	282.255	373.637	518.969	2344.22	1113.69	1460.29	1582	1388.03	1420.49	1	1	1	1	2.53163	-2.10491	-1.60531	-1.48181	-1.68888	-1.65029
Bra030298	AT2G21440.1	Symbols: | RNA-binding (RRM/RBD/RNP motifs) family protein | chr2:9173712-9179065 REVERSE LENGTH=1003	384.559	310.682	259.81	294.099	474.92	217.822	575.312	276.071	314.349	490.461	1125.52	395.126	1	1	1	1	1	-2.08393	-1.83017	-1.173	1.95636	-1.45602
Bra027068	AT1G62010.1	Symbols: | Mitochondrial transcription termination factor family protein | chr1:22915886-22917133 FORWARD LENGTH=415	300.586	246.751	228.434	250.807	343.719	284.738	579.544	278.67	393.885	404.066	365.341	420.849	1	1	1	1	1	-2.07968	-1.47135	-1.43428	-1.58631	-1.37708
Bra023850	AT3G22120.1	Symbols: CWLP | cell wall-plasma membrane linker protein | chr3:7795283-7796287 REVERSE LENGTH=334	907.387	1858.31	2339.01	2247.33	1661.35	2132.03	2434.93	1171.92	1784.9	1712.31	1823.32	1413.44	2.04798	2.57774	2.47671	1.83092	2.34964	-2.07773	-1.36418	-1.42201	-1.33544	-1.7227
Bra004060	AT3G45140.1	Symbols: LOX2, ATLOX2 | lipoxygenase 2 | chr3:16525437-16529233 FORWARD LENGTH=896	985.25	2761.13	3458.85	3731.19	2839.02	3017.02	2288.14	1102.84	1857.91	2452.98	2354.24	1582.12	2.80247	3.51063	3.78705	2.88152	3.06219	-2.07477	-1.23157	1.07204	1.02889	-1.44625
Bra024995	AT5G46790.1	Symbols: PYL1, RCAR12 | PYR1-like 1 | chr5:18984063-18984728 REVERSE LENGTH=221	5621.21	3471.61	3508.97	3532.12	4465.48	3827.1	4353.99	2110.83	3094.7	3343.95	2774.02	2420.39	-1.61919	-1.60195	-1.59145	-1.25881	-1.46879	-2.06269	-1.40692	-1.30205	-1.56956	-1.79888
Bra034980	NA	NA	4225.72	4345.57	3426.73	3417.17	4111.25	4382.88	1307.03	635.626	1122.58	1144.79	1194.4	1165.46	1.02836	-1.23316	-1.23661	-1.02784	1.03719	-2.05629	-1.16431	-1.14172	-1.0943	-1.12147
Bra034256	AT2G25520.1	Symbols: | Drug/metabolite transporter superfamily protein | chr2:10860950-10861993 FORWARD LENGTH=347	456.849	323.169	320.581	485.044	769.295	567.391	797.836	389.033	746.019	865.021	877.175	671.445	1	1	1	1.68392	1.24197	-2.05082	-1.06946	1.08421	1.09944	-1.18824
Bra015761	AT1G76340.1	Symbols: GONST3 | golgi nucleotide sugar transporter 3 | chr1:28635188-28636306 REVERSE LENGTH=372	1392.68	1006.45	741.899	914.293	778.498	746.08	1525.45	744.812	792.025	964.845	811.044	1139.02	-1.38375	-1.87718	-1.52323	-1.78893	-1.86666	-2.0481	-1.92601	-1.58103	-1.88085	-1.33927
Bra012912	AT3G49990.1	Symbols: | unknown protein; Has 1524 Blast hits to 1298 proteins in 225 species: Archae - 9; Bacteria - 84; Metazoa - 474; Fungi - 184; Plants - 98; Viruses - 17; Other Eukaryotes - 658 (source: NCBI BLink). | chr3:18532492-18534000 REVERSE LENGTH=502	3191.05	2294.29	1985.23	2138.28	2294.45	2243.92	2386.54	1165.99	1725.62	1810.58	2234.31	2119.04	-1.39087	-1.6074	-1.49234	-1.39077	-1.42209	-2.04679	-1.383	-1.31811	-1.06813	-1.12624
Bra033952	AT5G05020.1	Symbols: | Pollen Ole e 1 allergen and extensin family protein | chr5:1481084-1481548 REVERSE LENGTH=154	242.873	396.899	410.368	406.554	334.477	535.2	638.683	312.346	404.028	403.535	622.739	410.019	1	1	1	1	2.20362	-2.04479	-1.58079	-1.58272	-1.0256	-1.55769
Bra010934	AT1G27470.1	Symbols: | transducin family protein / WD-40 repeat family protein | chr1:9540368-9544218 REVERSE LENGTH=810	4189.45	2754.05	2819.43	3089.3	3666.86	3961.98	4430.28	2171.06	3038.14	2681.61	3071.33	2907.12	-1.5212	-1.48592	-1.35612	-1.14252	-1.05741	-2.04061	-1.45822	-1.6521	-1.44246	-1.52394
Bra011474	AT4G33800.1	Symbols: | unknown protein; Has 30201 Blast hits to 17322 proteins in 780 species: Archae - 12; Bacteria - 1396; Metazoa - 17338; Fungi - 3422; Plants - 5037; Viruses - 0; Other Eukaryotes - 2996 (source: NCBI BLink). | chr4:16210404-16211307 REVERSE LENGTH=170	179.304	302.258	586.498	342.881	420.394	846.529	503.876	248.103	433.129	303.395	501.721	363.087	1	3.27097	1	1	4.72119	-2.03091	-1.16334	-1.66079	-1.0043	-1.38776
Bra037500	AT5G48240.1	Symbols: | unknown protein; FUNCTIONS IN: molecular_function unknown; INVOLVED IN: biological_process unknown; LOCATED IN: nucleolus; EXPRESSED IN: cultured cell; CONTAINS InterPro DOMAIN/s: Protein of unknown function DUF1665 (InterPro:IPR012459); Has 402 Blast hits to 382 proteins in 162 species: Archae - 0; Bacteria - 4; Metazoa - 139; Fungi - 111; Plants - 54; Viruses - 1; Other Eukaryotes - …	2130.64	1198.3	1211.57	1278.62	1576.06	1916.02	2844.24	1401.83	2152.57	2030.86	2240.4	2247.14	-1.77805	-1.75858	-1.66636	-1.35188	-1.11201	-2.02895	-1.32132	-1.40051	-1.26952	-1.26572
Bra038333	AT1G68980.1	Symbols: | Tetratricopeptide repeat (TPR)-like superfamily protein | chr1:25933023-25934882 FORWARD LENGTH=619	477.972	278.074	305.735	330.592	322.775	284.723	515.385	254.379	323.581	399.366	351.776	412.347	1	1	1	1	1	-2.02605	-1.59275	-1.29051	-1.46509	-1.24988
Bra000760	AT4G12030.2	Symbols: BAT5, BASS5 | bile acid transporter 5 | chr4:7210981-7212713 FORWARD LENGTH=407	810.407	594.908	641.658	578.785	484.96	540.496	1032.88	511.342	714.674	542.02	591.541	664.221	-1.36224	-1.26299	-1.40019	-1.67108	-1.49938	-2.01994	-1.44525	-1.90561	-1.74608	-1.55502
Bra021422	AT3G02650.1	Symbols: | Tetratricopeptide repeat (TPR)-like superfamily protein | chr3:568135-569865 FORWARD LENGTH=576	855.599	542.288	447.341	551.821	629.573	589.576	1132.39	562.054	768.34	710.376	649.182	780.534	-1.57776	-1.91263	-1.5505	-1.35901	-1.45121	-2.01474	-1.47381	-1.59407	-1.74433	-1.45079
Bra029248	AT5G62680.1	Symbols: | Major facilitator superfamily protein | chr5:25165430-25167822 REVERSE LENGTH=616	21385.4	16422.5	16762.8	17590.7	19040.7	17642.2	17571.3	8768.19	13104.6	9965.85	13434.8	13198.2	-1.3022	-1.27577	-1.21572	-1.12314	-1.21217	-2.00398	-1.34085	-1.76315	-1.30789	-1.33134
Bra016155	AT1G71210.1	Symbols: | Pentatricopeptide repeat (PPR) superfamily protein | chr1:26838850-26841489 REVERSE LENGTH=879	3985.91	2569.62	2018.24	2633.96	2698.27	2324.78	3631.21	1813.11	2020.64	2088.66	1897.44	2448.68	-1.55117	-1.97494	-1.51328	-1.47721	-1.71453	-2.00275	-1.79706	-1.73854	-1.91374	-1.48293
Bra014502	AT3G60260.1	Symbols: | ELMO/CED-12 family protein | chr3:22274303-22276839 FORWARD LENGTH=266	3753.07	1855.98	3816.39	1998.91	2280.49	2126.37	941.599	323.071	450.369	1377.39	1798.07	767.063	-2.02215	1.01687	-1.87756	-1.64573	-1.76501	-2.91453	-2.09073	1.46282	1.90959	-1.22754
Bra024397	AT5G65560.1	Symbols: | Pentatricopeptide repeat (PPR) superfamily protein | chr5:26201012-26203759 REVERSE LENGTH=915	3032	1106.44	1100.54	1097.62	1166.58	1192.72	2554.54	1105.08	1048.02	1373.89	1390.09	1279.6	-2.74032	-2.75501	-2.76234	-2.59905	-2.54209	-2.31163	-2.43749	-1.85935	-1.83768	-1.99636
Bra010685	AT4G39390.1	Symbols: ATNST-KT1, NST-K1 | nucleotide sugar transporter-KT 1 | chr4:18316278-18317854 FORWARD LENGTH=337	1740.55	747.877	758.766	745.553	648.823	602.608	1606.21	792.732	723.19	1003.91	953.191	1168.94	-2.32732	-2.29392	-2.33458	-2.68263	-2.88836	-2.02617	-2.22101	-1.59995	-1.68509	-1.37407
Bra014682	AT3G56620.1	Symbols: | nodulin MtN21 /EamA-like transporter family protein | chr3:20972696-20974495 REVERSE LENGTH=377	1317.13	609.516	576.229	495.202	536.969	317.793	1090.59	531.804	506.534	640.374	683.978	551.42	-2.16094	-2.28578	-2.65978	-2.4529	-4.14462	-2.05074	-2.15304	-1.70305	-1.59448	-1.97778
Bra023110	AT5G42020.1	Symbols: BIP, BIP2 | Heat shock protein 70 (Hsp 70) family protein | chr5:16807697-16810480 REVERSE LENGTH=668	9843.85	3384.74	4437.32	3957.58	4499.89	3420.73	9219.16	4112.37	3961.75	4693.87	4782.65	4641.02	-2.9083	-2.21842	-2.48734	-2.18758	-2.8777	-2.24181	-2.32704	-1.96409	-1.92763	-1.98645
Bra014516	AT3G60050.1	Symbols: | Pentatricopeptide repeat (PPR) superfamily protein | chr3:22180231-22181652 REVERSE LENGTH=473	762.984	350.203	376.786	326.229	369.043	239.311	679.257	304.259	276.228	519.54	397.453	388.419	-2.17869	-2.02498	-2.3388	-2.06747	-3.18825	-2.2325	-2.45904	-1.30742	-1.70902	-1.74877
Bra037171	AT5G66440.1	Symbols: | unknown protein; BEST Arabidopsis thaliana protein match is: unknown protein (TAIR:AT4G34560.1); Has 1807 Blast hits to 1807 proteins in 277 species: Archae - 0; Bacteria - 0; Metazoa - 736; Fungi - 347; Plants - 385; Viruses - 0; Other Eukaryotes - 339 (source: NCBI BLink). | chr5:26530274-26531032 REVERSE LENGTH=252	2858.34	1731.62	1289.09	1163.72	857.534	722.952	2805.51	1244.7	1071.36	1606.32	1901.58	1807.29	-1.65067	-2.21733	-2.45621	-3.33321	-3.95371	-2.25396	-2.61864	-1.74654	-1.47536	-1.55233
Bra034219	AT4G03560.1	Symbols: ATTPC1, TPC1, ATCCH1, FOU2 | two-pore channel 1 | chr4:1580253-1585691 FORWARD LENGTH=733	3434.05	2330.73	2132.78	1946.89	1495.32	1807.29	675.266	293.646	270.423	533.886	873.507	341.802	-1.47338	-1.61013	-1.76386	-2.29653	-1.90011	-2.29959	-2.49707	-1.26481	1.29357	-1.97561
Bra008986	AT5G11160.1	Symbols: APT5 | adenine phosphoribosyltransferase 5 | chr5:3550774-3551986 FORWARD LENGTH=191	362.72	367.225	271.257	409.016	439.594	920.945	773.044	311.693	245.443	640.823	450.208	434.655	1	1	1	1	2.539	-2.48015	-3.14959	-1.20633	-1.71708	-1.77852
Bra032007	AT3G03210.1	Symbols: | unknown protein; FUNCTIONS IN: molecular_function unknown; INVOLVED IN: biological_process unknown; LOCATED IN: endomembrane system; EXPRESSED IN: 24 plant structures; EXPRESSED DURING: 15 growth stages; Has 59 Blast hits to 59 proteins in 17 species: Archae - 0; Bacteria - 0; Metazoa - 0; Fungi - 0; Plants - 56; Viruses - 0; Other Eukaryotes - 3 (source: NCBI BLink). | chr3:740987-742…	964.398	330.878	535.488	422.462	457.265	451.97	896.471	393.512	430.285	520.593	478.331	566.432	-2.91466	-1.80097	-2.2828	-2.10906	-2.13377	-2.27813	-2.08344	-1.72202	-1.87416	-1.58266
Bra009590	AT5G02420.1	Symbols: | unknown protein; Has 90 Blast hits to 90 proteins in 10 species: Archae - 0; Bacteria - 0; Metazoa - 0; Fungi - 0; Plants - 90; Viruses - 0; Other Eukaryotes - 0 (source: NCBI BLink). | chr5:523501-523848 FORWARD LENGTH=115	633.99	397.241	558.89	329.583	489.282	748.963	873.522	378.093	386.948	676.655	479.391	542.562	-1.59598	-1.13437	-1.92361	-1.29576	1.18135	-2.31034	-2.25747	-1.29094	-1.82215	-1.60999
Bra020014	AT1G09560.1	Symbols: GLP5 | germin-like protein 5 | chr1:3093896-3094639 FORWARD LENGTH=219	1676.84	1183.75	1005.03	1395.89	1161.39	1547.99	1774.26	857.128	795.108	899.952	907.83	1086.45	-1.41655	-1.66845	-1.20127	-1.44382	-1.08324	-2.07001	-2.23147	-1.97151	-1.9544	-1.63308
Bra003698	AT1G76950.1	Symbols: PRAF1 | Regulator of chromosome condensation (RCC1) family with FYVE zinc finger domain | chr1:28906952-28911325 FORWARD LENGTH=1103	618.709	778.051	808.668	894.87	1158.73	706.914	1793.72	870.294	828.506	1144.3	1048.57	997.906	1.25754	1.30702	1.44635	1.87282	1.14256	-2.06105	-2.16501	-1.56753	-1.71063	-1.79748
Bra025414	AT3G30340.1	Symbols: | nodulin MtN21 /EamA-like transporter family protein | chr3:11956626-11958969 FORWARD LENGTH=364	864.008	751.178	563.287	963.411	1059.38	2006.44	818.924	309.349	378.622	439.839	490.383	1091.58	-1.1502	-1.53387	1.11505	1.22612	2.32225	-2.64725	-2.16291	-1.86187	-1.66997	1.33294
Bra036570	AT5G26220.1	Symbols: | ChaC-like family protein | chr5:9163178-9164613 REVERSE LENGTH=216	141.038	150.805	114.532	105.448	154.126	190.49	964.256	213.87	455.19	635.443	613.981	485.509	1	1	1	1	1	-4.50861	-2.11836	-1.51745	-1.5705	-1.98607
Bra027041	AT1G62085.1	Symbols: | Mitochondrial transcription termination factor family protein | chr1:22948757-22950142 REVERSE LENGTH=461	252.85	263.08	292.176	261.46	284.674	308.164	657.109	325.386	319.807	354.472	742.128	410.11	1	1	1	1	1	-2.01948	-2.0547	-1.85377	1.12938	-1.60227
Bra029545	AT4G04990.1	Symbols: | Protein of unknown function (DUF761) | chr4:2555090-2557046 FORWARD LENGTH=303	219.283	440.43	278.577	434.664	293.833	371.165	871.547	431.588	428.034	459.34	744.405	605.144	1	1	1	1	1	-2.0194	-2.03616	-1.89739	-1.1708	-1.44023
Bra017260	AT2G36100.1	Symbols: | Uncharacterised protein family (UPF0497) | chr2:15159744-15160669 REVERSE LENGTH=206	183.509	346.714	288.719	214.863	212.377	576.466	507.604	246.865	250.336	330.1	369.7	344.447	1	1	1	1	3.14135	-2.0562	-2.02769	-1.53773	-1.37302	-1.47368
Bra006161	AT5G12420.1	Symbols: | O-acyltransferase (WSD1-like) family protein | chr5:4024568-4026715 REVERSE LENGTH=480	1417.32	384.414	347.958	595.821	510.35	780.58	1096.85	547.659	289.84	380.21	973.13	565.792	-3.68696	-4.07325	-2.37877	-2.77715	-1.81573	-2.0028	-3.78433	-2.88485	-1.12714	-1.93861
Bra040315	AT2G45340.1	Symbols: | Leucine-rich repeat protein kinase family protein | chr2:18691739-18694466 FORWARD LENGTH=691	1088.14	174.285	135.417	159.11	125.874	137.862	577.323	255.415	261.267	204.627	291.078	338.452	-6.24345	-8.03548	-6.83892	-8.64468	-7.89297	-2.26033	-2.20971	-2.82134	-1.9834	-1.70578
Bra010848	AT1G29160.1	Symbols: | Dof-type zinc finger DNA-binding family protein | chr1:10183797-10184324 REVERSE LENGTH=175	1055.2	290.073	248.586	189.719	241.05	225.526	692.34	282.006	264.33	172.636	426.886	382.066	-3.6377	-4.24481	-5.56191	-4.37752	-4.67884	-2.45505	-2.61923	-4.0104	-1.62184	-1.8121
Bra003980	AT1G69780.1	Symbols: ATHB13 | Homeobox-leucine zipper protein family | chr1:26259166-26260465 FORWARD LENGTH=294	1157.87	673.006	551.405	761.515	913.644	967.137	1418.39	706.729	596.063	532.823	779.369	720.515	-1.72045	-2.09985	-1.52048	-1.26731	-1.19721	-2.00698	-2.3796	-2.66203	-1.81992	-1.96858
Bra008657	AT5G16010.1	Symbols: | 3-oxo-5-alpha-steroid 4-dehydrogenase family protein | chr5:5227982-5229012 FORWARD LENGTH=268	2197.01	3366.78	3128.92	2600.93	2048.2	1960.04	686.788	258.619	208.138	244.193	446.654	654.352	1.53244	1.42417	1.18385	-1.07265	-1.1209	-2.6556	-3.29968	-2.81248	-1.53763	-1.04957
Bra005701	AT5G02020.1	Symbols: SIS | Encodes a protein involved in salt tolerance, names SIS (Salt Induced Serine rich). | chr5:386557-387921 REVERSE LENGTH=149	407.255	317.044	212.395	160.497	286.203	566.062	558.905	163.775	163.565	205.23	897.275	443.257	1	1	1	1	1.38994	-3.41264	-3.41702	-2.72331	1.60542	-1.26091
Bra014217	AT5G49420.1	Symbols: | MADS-box transcription factor family protein | chr5:20035166-20036170 REVERSE LENGTH=334	182.191	280.603	331.433	299.267	322.035	310.638	585.73	190.932	278.034	217.237	615.747	839.377	1	1	1	1	1	-3.06774	-2.10668	-2.69627	1.05125	1.43304
Bra020461	AT5G57180.2	Symbols: CIA2 | chloroplast import apparatus 2 | chr5:23168393-23170763 FORWARD LENGTH=435	1657.01	1441.38	1217.19	1278.47	1175.75	1741.67	2417.54	1066.68	1031.39	1140.71	1314.66	1639.65	-1.1496	-1.36134	-1.29609	-1.40932	1.05109	-2.26642	-2.34396	-2.11933	-1.83891	-1.47442
Bra014477	AT3G60680.1	Symbols: | Plant protein of unknown function (DUF641) | chr3:22430246-22431745 FORWARD LENGTH=499	509.26	577.972	700.025	647.978	682.041	1676.17	1023.28	483.331	420.639	494.241	758.194	547.417	1.13493	1.37459	1.27239	1.33928	3.29138	-2.11714	-2.43268	-2.07041	-1.34963	-1.86929
Bra026799	NA	NA	9868.07	5224.04	5879.64	4830	5071.45	3717.4	1193.23	331.645	580.6	498.312	956.148	1402.89	-1.88897	-1.67835	-2.04308	-1.94581	-2.65456	-3.59791	-2.05517	-2.39454	-1.24796	1.17571
Bra016419	AT1G77130.1	Symbols: PGSIP2, GUX3 | plant glycogenin-like starch initiation protein 2 | chr1:28979066-28981228 REVERSE LENGTH=618	519.5	533.944	417.758	460.071	438.53	442.572	952.88	472.55	419.77	469.592	478.068	557.433	1.0278	-1.24354	-1.12917	-1.18464	-1.17382	-2.01646	-2.27001	-2.02917	-1.99319	-1.70941
Bra030024	AT1G24400.1	Symbols: LHT2, AATL2, ATLHT2 | lysine histidine transporter 2 | chr1:8651563-8653561 REVERSE LENGTH=441	1470.7	373.392	341.275	752.933	737.691	1269.28	1145.81	560.469	386.536	427.09	299.012	675.946	-3.93876	-4.30943	-1.95329	-1.99365	-1.15869	-2.04438	-2.9643	-2.68283	-3.83199	-1.69512
Bra015893	AT1G74790.1	Symbols: | catalytics | chr1:28098912-28101673 FORWARD LENGTH=695	2171.36	957.776	804.279	1432.68	1152.91	1429.74	1520.37	743.343	475.227	643.056	547.639	877.969	-2.26709	-2.69976	-1.51559	-1.88337	-1.51871	-2.04531	-3.19925	-2.36429	-2.77623	-1.73169
Bra024552	AT1G22960.1	Symbols: | Pentatricopeptide repeat (PPR) superfamily protein | chr1:8128086-8130242 REVERSE LENGTH=718	1475.57	677.062	691.921	801.086	988.847	1171.54	2317.38	1014.27	1140.42	1137.4	990.544	1249.19	-2.17937	-2.13257	-1.84196	-1.49221	-1.25951	-2.28478	-2.03204	-2.03744	-2.3395	-1.85511
Bra010595	AT4G37295.1	Symbols: | unknown protein; FUNCTIONS IN: molecular_function unknown; INVOLVED IN: biological_process unknown; LOCATED IN: endomembrane system; EXPRESSED IN: stem, root, leaf; EXPRESSED DURING: LP.06 six leaves visible, LP.04 four leaves visible; Has 30201 Blast hits to 17322 proteins in 780 species: Archae - 12; Bacteria - 1396; Metazoa - 17338; Fungi - 3422; Plants - 5037; Viruses - 0; Other Eu…	633.885	172.54	304.912	243.861	139.472	336.654	747.098	259.941	314.92	303.152	329.853	440.069	-3.67384	-2.07891	-2.59937	-4.54489	-1.8829	-2.87411	-2.37234	-2.46443	-2.26494	-1.69768
Bra010291	AT1G65310.1	Symbols: ATXTH17, XTH17 | xyloglucan endotransglucosylase/hydrolase 17 | chr1:24257262-24258319 FORWARD LENGTH=282	3756.08	1381.6	1356.29	1295.14	1424.58	2024.18	2301.47	855.284	808.819	1110.14	517.565	1156.24	-2.71865	-2.76938	-2.90013	-2.63662	-1.85561	-2.69088	-2.84547	-2.07313	-4.44673	-1.99048
Bra009763	AT5G24420.1	Symbols: PGL5 | 6-phosphogluconolactonase 5 | chr5:8336943-8337879 REVERSE LENGTH=252	4375	1118.25	1453.37	1719.35	1747.28	2562.89	1927.11	946.952	769.59	934.88	730.13	1011.61	-3.91236	-3.01025	-2.54457	-2.50389	-1.70706	-2.03507	-2.50407	-2.06134	-2.63941	-1.90499
Bra032113	AT1G64840.1	Symbols: | Protein of unknown function (DUF295) | chr1:24094010-24095164 FORWARD LENGTH=384	901.349	128.861	145.046	70.1291	105.228	138.948	750.996	278.471	156.254	163.977	272.939	593.71	-6.99474	-6.21423	-12.8527	-8.56568	-6.48695	-2.69686	-4.80625	-4.57989	-2.75152	-1.26492
Bra020591	AT5G27420.1	Symbols: CNI1, ATL31 | carbon/nitrogen insensitive 1 | chr5:9684119-9685225 FORWARD LENGTH=368	923.359	419.358	242.34	211.192	200.571	224.554	500.703	231.939	150.805	110.754	129.944	260.712	-2.20184	-3.81018	-4.37213	-4.60365	-4.11197	-2.15877	-3.3202	-4.52086	-3.85322	-1.92052
Bra014339	AT2G01150.1	Symbols: RHA2B | RING-H2 finger protein 2B | chr2:100703-101146 FORWARD LENGTH=147	1020.39	292.172	339.957	303.265	228.238	223.981	545.109	228.98	245.065	268.72	182.11	290.824	-3.49243	-3.00153	-3.36468	-4.47073	-4.5557	-2.3806	-2.22434	-2.02854	-2.9933	-1.87436
Bra017680	AT4G34800.1	Symbols: | SAUR-like auxin-responsive protein family | chr4:16596860-16597144 FORWARD LENGTH=94	678.116	231.794	93.1246	123.569	153.914	201.812	608.394	146.711	172.239	107.082	237.515	320.756	-2.92551	-7.28181	-5.48775	-4.40581	-3.36014	-4.14689	-3.53227	-5.68157	-2.5615	-1.89675
Bra005595	AT2G32430.1	Symbols: | Galactosyltransferase family protein | chr2:13771626-13774102 FORWARD LENGTH=409	1307.18	455.859	300.096	377.285	334.458	330.858	1117.86	485.133	488.582	425.378	506.863	585.547	-2.86751	-4.35587	-3.4647	-3.90835	-3.95088	-2.30423	-2.28797	-2.62792	-2.20545	-1.90909
Bra031992	AT3G03440.1	Symbols: | ARM repeat superfamily protein | chr3:815709-818568 FORWARD LENGTH=408	5966.72	1227.42	1553.39	1516.68	1687.98	1565.07	4320.66	2085.38	2007.94	2119.04	1832.06	2201.56	-4.86119	-3.8411	-3.93407	-3.53483	-3.81243	-2.07188	-2.15179	-2.03897	-2.35836	-1.96254
Bra005025	AT2G39700.1	Symbols: ATEXPA4, ATEXP4, ATHEXP ALPHA 1.6, EXPA4 | expansin A4 | chr2:16544246-16545434 REVERSE LENGTH=257	1460.21	357.711	368.271	602.879	442.729	589.368	663.063	291.355	269.435	286.569	165.197	336.687	-4.08209	-3.96504	-2.42206	-3.2982	-2.47759	-2.27579	-2.46094	-2.3138	-4.01377	-1.96938
Bra016512	AT1G19300.1	Symbols: GATL1, PARVUS, GLZ1, ATGATL1 | Nucleotide-diphospho-sugar transferases superfamily protein | chr1:6671451-6672506 REVERSE LENGTH=351	4266.2	1909.43	1647.38	1910.72	1315.93	1848.7	4107.99	1968.93	1526.66	1733.61	1432.55	2245.89	-2.23428	-2.58969	-2.23277	-3.24197	-2.30768	-2.08641	-2.69083	-2.36962	-2.86761	-1.82911
Bra027807	AT1G63270.1	Symbols: ATNAP10, NAP10 | non-intrinsic ABC protein 10 | chr1:23469664-23470353 REVERSE LENGTH=229	1080.1	296.077	355.926	243.666	334.191	313.034	521.303	157.229	234.709	210.184	256.469	321.991	-3.64804	-3.03462	-4.43271	-3.23198	-3.45042	-3.31557	-2.22106	-2.48022	-2.03262	-1.619
Bra037334	AT4G00340.1	Symbols: RLK4 | receptor-like protein kinase 4 | chr4:148958-151496 FORWARD LENGTH=818	6387.89	2339.34	1538.5	2129.78	1985.66	1856.84	3472.22	1521.49	1189.71	1615.29	1328.37	1745.66	-2.73064	-4.15202	-2.99932	-3.21701	-3.44019	-2.28212	-2.91854	-2.1496	-2.6139	-1.98906
Bra002306	AT5G20500.1	Symbols: | Glutaredoxin family protein | chr5:6938652-6939665 FORWARD LENGTH=135	1571.8	755.811	514.635	594.053	492.806	463.766	2411.1	1136.58	827.202	1126.83	932.229	1211.03	-2.07962	-3.0542	-2.64589	-3.18949	-3.38921	-2.12136	-2.91477	-2.13972	-2.58638	-1.99095
Bra037224	AT2G18350.1	Symbols: AtHB24, HB24, ZHD6 | homeobox protein 24 | chr2:7971122-7971910 REVERSE LENGTH=262	3403.63	1575.86	1065.15	1284.95	1116.49	1285.81	2568.16	936.934	949.832	1039.81	1082.52	1411.79	-2.15986	-3.19545	-2.64884	-3.04851	-2.64707	-2.74103	-2.7038	-2.46984	-2.37239	-1.81908
Bra037786	AT5G64640.1	Symbols: | Plant invertase/pectin methylesterase inhibitor superfamily | chr5:25836820-25839053 FORWARD LENGTH=602	1028.69	215.275	257.84	261.815	340.952	332.432	1155.05	409.142	438.24	448.82	357.643	619.729	-4.77849	-3.98964	-3.92907	-3.01711	-3.09444	-2.8231	-2.63566	-2.57353	-3.22962	-1.8638
Bra022418	AT3G19390.1	Symbols: | Granulin repeat cysteine protease family protein | chr3:6723024-6724768 FORWARD LENGTH=452	1820.03	762.633	788.839	795.534	656.249	767.392	1925.28	849.039	708.794	709.55	800.01	1024.74	-2.38651	-2.30723	-2.28781	-2.77338	-2.37171	-2.2676	-2.71628	-2.71338	-2.40657	-1.8788
Bra024970	AT4G38150.1	Symbols: | Pentatricopeptide repeat (PPR) superfamily protein | chr4:17901211-17902119 REVERSE LENGTH=302	1584.77	443.968	537.894	442.44	592.423	392.757	1400.97	661.564	577.689	657.691	496.119	758.879	-3.56956	-2.94625	-3.58189	-2.67506	-4.03499	-2.11766	-2.42513	-2.13013	-2.82386	-1.8461
Bra016106	AT1G71850.1	Symbols: | Ubiquitin carboxyl-terminal hydrolase family protein | chr1:27024875-27026287 REVERSE LENGTH=470	1783.25	467.173	399.47	547.313	692.599	723.357	813.279	227.21	289.387	332.006	256.256	443.72	-3.81711	-4.46404	-3.25819	-2.57472	-2.46524	-3.57942	-2.81035	-2.44959	-3.1737	-1.83287
Bra011581	AT4G35060.1	Symbols: HIPP25 | Heavy metal transport/detoxification superfamily protein | chr4:16685874-16686419 REVERSE LENGTH=153	3319.13	1170.7	1311.99	992.482	1349.82	880.044	1171.68	584.371	536.311	569.498	556.043	754.182	-2.83517	-2.52984	-3.34427	-2.45894	-3.77155	-2.00503	-2.1847	-2.05739	-2.10718	-1.55358
Bra025734	AT1G19360.1	Symbols: | Nucleotide-diphospho-sugar transferase family protein | chr1:6690672-6692211 REVERSE LENGTH=428	2739.74	1288.8	1103.73	1221.68	1185.81	1087.87	2512.85	1236.13	934.669	1115.2	871.669	1274.73	-2.12581	-2.48226	-2.2426	-2.31044	-2.51844	-2.03284	-2.68849	-2.25327	-2.8828	-1.97128
Bra020821	AT4G23130.2	Symbols: CRK5, RLK6 | cysteine-rich RLK (RECEPTOR-like protein kinase) 5 | chr4:12117688-12120134 REVERSE LENGTH=663	748.868	251.805	171.738	218.945	352.172	130.584	678.731	222.145	292.389	291.884	323.164	404.309	-2.974	-4.36053	-3.42035	-2.12643	-5.73476	-3.05535	-2.32133	-2.32535	-2.10027	-1.67874
Bra023538	AT5G15780.1	Symbols: | Pollen Ole e 1 allergen and extensin family protein | chr5:5144898-5146297 REVERSE LENGTH=401	1857.11	1020.67	691.594	1792.88	1202.35	2843.87	1950.09	947.469	753.79	930.283	629.052	1193.33	-1.8195	-2.68526	-1.03583	-1.54457	1.53134	-2.05821	-2.58705	-2.09623	-3.10005	-1.63416
Bra015976	AT1G73660.1	Symbols: | protein tyrosine kinase family protein | chr1:27692247-27696718 REVERSE LENGTH=1030	4842.43	2863.32	2337.19	2739.19	2845.81	2524.39	4448.07	1912.89	1985.64	2149.96	2045.1	2558.77	-1.69119	-2.0719	-1.76783	-1.7016	-1.91826	-2.32531	-2.24012	-2.06891	-2.17499	-1.73836
Bra006582	NA	NA	1317.76	720.859	536.07	622.619	612.613	515.108	2098.28	1008.52	899.22	1027.74	776.154	1053.93	-1.82804	-2.45819	-2.11648	-2.15105	-2.55822	-2.08055	-2.33344	-2.04164	-2.70343	-1.99091
Bra024582	AT1G23320.1	Symbols: TAR1 | tryptophan aminotransferase related 1 | chr1:8273423-8275350 REVERSE LENGTH=388	550.785	313.3	372.636	248.135	160.655	363.664	737.314	222.381	332.868	186.308	278.889	586.686	-1.75801	-1.47808	-2.2197	-3.42837	-1.51454	-3.31554	-2.21503	-3.9575	-2.64375	-1.25674
Bra022955	AT2G33830.2	Symbols: | Dormancy/auxin associated family protein | chr2:14309768-14310286 REVERSE LENGTH=108	721.212	410.466	395.307	328.979	229.249	284.127	906.831	302.109	325.095	341.44	403.922	519.359	-1.75706	-1.82444	-2.19227	-3.14598	-2.53834	-3.00167	-2.78943	-2.6559	-2.24506	-1.74606
Bra000196	AT2G40630.1	Symbols: | Uncharacterised conserved protein (UCP030365) | chr2:16958442-16960942 FORWARD LENGTH=535	1429.52	766.945	721.202	663.211	677.052	570.546	1293.64	611.895	644.638	625.195	506.303	664.049	-1.86391	-1.98214	-2.15545	-2.11139	-2.50553	-2.11415	-2.00677	-2.06918	-2.55507	-1.94811
Bra004647	AT2G41750.1	Symbols: | DTW domain-containing protein | chr2:17421746-17422507 REVERSE LENGTH=253	1273.42	717.392	784.404	685.824	738.372	564.174	636.531	277.558	187.969	219.901	262.911	324.962	-1.77507	-1.62342	-1.85677	-1.72463	-2.25714	-2.29333	-3.38636	-2.89463	-2.42109	-1.95879
Bra038300	NA	NA	267.052	286.191	109.31	135.749	193.257	568.387	1194.39	558.219	275.736	328.304	349.064	714.967	1	1	1	1	2.12838	-2.13964	-4.33164	-3.63806	-3.42169	-1.67055
Bra036361	AT4G36800.1	Symbols: RCE1 | RUB1 conjugating enzyme 1 | chr4:17341237-17342148 REVERSE LENGTH=184	175.008	89.1946	109.353	43.6765	116.829	57.8562	762.292	214.34	43.1055	214.885	228.992	444.031	1	1	1	1	1	-3.55646	-17.6843	-3.54744	-3.3289	-1.71675
Bra010093	AT1G78700.1	Symbols: BEH4 | BES1/BZR1 homolog 4 | chr1:29599854-29601539 FORWARD LENGTH=325	332.368	156.57	104.131	176.99	170.756	272.32	707.868	310.015	202.248	338.936	221.367	379.278	1	1	1	1	1	-2.28333	-3.5	-2.0885	-3.19771	-1.86636
Bra008492	AT1G80150.1	Symbols: | Tetratricopeptide repeat (TPR)-like superfamily protein | chr1:30148738-30149931 FORWARD LENGTH=397	570.626	87.4622	259.846	231.174	297.312	93.8402	724.822	210.681	245.41	214.387	154.008	420.849	-6.52426	-2.19602	-2.46838	-1.91928	-6.08083	-3.44038	-2.95351	-3.3809	-4.70639	-1.72229
Bra000007	AT2G37580.1	Symbols: | RING/U-box superfamily protein | chr2:15764745-15765452 FORWARD LENGTH=235	495.7	408.617	360.646	382.868	354.371	356.302	1797.54	530.619	339.623	570.568	661.368	1035.82	1	1	1	1	1	-3.38763	-5.29275	-3.15044	-2.71791	-1.73538
Bra029021	AT5G54520.1	Symbols: | Transducin/WD40 repeat-like superfamily protein | chr5:22146781-22149089 REVERSE LENGTH=457	323.609	172.204	215.071	201.227	171.717	285.47	571.754	252.849	245.96	267.979	213.016	285.961	1	1	1	1	1	-2.26125	-2.32458	-2.13358	-2.68409	-1.99941
Bra003311	AT2G45160.1	Symbols: HAM1, ATHAM1, LOM1 | GRAS family transcription factor | chr2:18618110-18620032 REVERSE LENGTH=640	4538.7	3913.61	3165.76	4190.09	3594.72	5569	5248.94	2443.27	2003.31	2401.16	2210.94	2901.76	-1.15972	-1.43368	-1.0832	-1.2626	1.227	-2.14833	-2.62013	-2.186	-2.37408	-1.80888
Bra021803	AT2G32660.1	Symbols: AtRLP22, RLP22 | receptor like protein 22 | chr2:13853897-13855666 REVERSE LENGTH=589	85.4018	124.976	107.34	107.469	117.105	261.183	4442.45	2110.59	1768.75	1959.4	1879.37	2264.47	1	1	1	1	1	-2.10484	-2.51163	-2.26725	-2.3638	-1.96181
Bra009895	AT5G26280.1	Symbols: | TRAF-like family protein | chr5:9208724-9210403 FORWARD LENGTH=350	4690.82	3570.38	2685.61	2983.88	2352.82	2712.79	3029.59	1179.42	1361.82	996.703	1294.1	1696.06	-1.31382	-1.74665	-1.57205	-1.9937	-1.72915	-2.56871	-2.22466	-3.03961	-2.34108	-1.78625
Bra002429	AT5G22790.1	Symbols: RER1 | reticulata-related 1 | chr5:7599395-7601573 REVERSE LENGTH=433	2421.04	1709.04	1993.73	2994.87	3497.47	4977.69	6136.94	2812.78	2938.37	3010.9	2673.19	3467.92	-1.41661	-1.21433	1.23702	1.44461	2.05601	-2.18181	-2.08855	-2.03824	-2.29574	-1.76963
Bra030439	AT1G51420.1	Symbols: ATSPP1, SPP1 | sucrose-phosphatase 1 | chr1:19064852-19066704 REVERSE LENGTH=423	340.251	450.534	370.78	287.011	395.451	379.016	540.598	184.361	129.697	240.02	235.544	333.867	1	1	1	1	1	-2.93228	-4.16816	-2.2523	-2.2951	-1.6192
Bra018566	AT1G09330.1	Symbols: | unknown protein; FUNCTIONS IN: molecular_function unknown; INVOLVED IN: biological_process unknown; LOCATED IN: integral to membrane; EXPRESSED IN: 24 plant structures; EXPRESSED DURING: 15 growth stages; CONTAINS InterPro DOMAIN/s: Protein of unknown function DUF846, eukaryotic (InterPro:IPR008564); Has 518 Blast hits to 518 proteins in 206 species: Archae - 0; Bacteria - 0; Metazoa -…	4945.72	2516.94	2445.14	2495.36	2272.5	2474.66	6963.02	3364.71	2573.04	3174.04	2548.97	3484.81	-1.96497	-2.02267	-1.98197	-2.17633	-1.99855	-2.06943	-2.70615	-2.19374	-2.7317	-1.99811
Bra015798	AT1G76020.1	Symbols: | Thioredoxin superfamily protein | chr1:28532243-28533542 REVERSE LENGTH=225	2739.86	1271.89	888.535	1397.97	1270.33	1964.56	2364.4	1083.3	1079.23	1021.67	820.255	1305.45	-2.15416	-3.08357	-1.95988	-2.15681	-1.39464	-2.18259	-2.19082	-2.31425	-2.88252	-1.81118
Bra014611	NA	NA	227.746	310.544	115.996	151.669	183.812	281.34	529.158	242.186	195.081	249.657	247.469	473.682	1	1	1	1	1	-2.18492	-2.7125	-2.11954	-2.13828	-1.11712
Bra007755	AT3G53690.1	Symbols: | RING/U-box superfamily protein | chr3:19898997-19900044 REVERSE LENGTH=320	692.156	468.366	326.389	365.497	484.074	332.331	1078.81	500.514	486.098	537.75	444.978	595.599	-1.47781	-2.12065	-1.89374	-1.42986	-2.08273	-2.1554	-2.21933	-2.00616	-2.42441	-1.8113
Bra010290	AT1G65310.1	Symbols: ATXTH17, XTH17 | xyloglucan endotransglucosylase/hydrolase 17 | chr1:24257262-24258319 FORWARD LENGTH=282	2081.4	1527.82	1721.42	1510.35	1188.31	1888.45	2253.25	1076.72	929.131	1101.11	1070.63	1316.1	-1.36233	-1.20912	-1.37809	-1.75156	-1.10217	-2.0927	-2.42512	-2.04634	-2.1046	-1.71207
Bra009894	AT5G26280.1	Symbols: | TRAF-like family protein | chr5:9208724-9210403 FORWARD LENGTH=350	2350.03	3446.33	1782.75	2468.5	1829.3	2144.96	2184.2	979.227	930.094	982.969	1042.91	1502.89	1.4665	-1.31821	1.05041	-1.28466	-1.09561	-2.23053	-2.34836	-2.22204	-2.09433	-1.45333
Bra018201	AT3G46690.1	Symbols: | UDP-Glycosyltransferase superfamily protein | chr3:17197760-17199197 REVERSE LENGTH=452	139.572	321.06	337.635	192.006	144.167	137.824	641.147	252.367	312.627	215.438	312.983	526.26	1	1	1	1	1	-2.54053	-2.05084	-2.97602	-2.0485	-1.21831
Bra019300	AT4G23490.1	Symbols: | Protein of unknown function (DUF604) | chr4:12251580-12253973 REVERSE LENGTH=526	1590.99	500.277	922.942	864.489	812.917	829.702	2639.84	1012.9	913.461	876.924	782.314	612.691	-3.18022	-1.72382	-1.84038	-1.95714	-1.91754	-2.60622	-2.88993	-3.01034	-3.3744	-4.3086
Bra028636	AT5G09430.1	Symbols: | alpha/beta-Hydrolases superfamily protein | chr5:2932162-2933362 FORWARD LENGTH=311	560.221	211.062	289.07	410.836	330.119	369.942	3401.15	1118.12	695.499	962.063	975.94	671.119	-2.6543	-1.93801	-1.36361	-1.69703	-1.51435	-3.04185	-4.89023	-3.53527	-3.485	-5.06788
Bra018272	AT2G31270.1	Symbols: ATCDT1A, CDT1A, CDT1 | homolog of yeast CDT1 A | chr2:13329037-13331544 FORWARD LENGTH=571	1025.4	387.181	574.37	643.59	517.735	977.898	1137.74	477.276	445.017	317.229	465.089	341.633	-2.64837	-1.78526	-1.59325	-1.98055	-1.04858	-2.38382	-2.55662	-3.58649	-2.44628	-3.3303
Bra024966	AT5G47060.1	Symbols: | Protein of unknown function (DUF581) | chr5:19116843-19117639 FORWARD LENGTH=177	2370.02	1058.09	1360.77	1465.65	1486.11	1436.09	2186.86	826.813	854.74	1077.12	899.285	877.854	-2.2399	-1.74168	-1.61704	-1.59478	-1.65033	-2.64493	-2.55851	-2.03028	-2.43178	-2.49114
Bra038785	AT4G21120.1	Symbols: AAT1, CAT1 | amino acid transporter 1 | chr4:11270318-11273775 FORWARD LENGTH=594	13483.6	6263.45	8066.65	7852.35	10062.2	7369.11	4068.11	1058.66	1097.09	1135.16	748.617	971.913	-2.15274	-1.67152	-1.71714	-1.34003	-1.82975	-3.8427	-3.70809	-3.58373	-5.43417	-4.18567
Bra001669	AT3G17580.1	Symbols: | unknown protein; BEST Arabidopsis thaliana protein match is: unknown protein (TAIR:AT1G48330.1); Has 40 Blast hits to 40 proteins in 11 species: Archae - 0; Bacteria - 0; Metazoa - 0; Fungi - 0; Plants - 40; Viruses - 0; Other Eukaryotes - 0 (source: NCBI BLink). | chr3:6015276-6015518 FORWARD LENGTH=80	644.296	299.811	442.404	423.464	455.772	607.68	807.008	178.511	205.404	256.757	229.85	401.04	-2.14901	-1.45635	-1.52149	-1.41364	-1.06026	-4.52077	-3.92888	-3.14308	-3.51102	-2.01229
Bra031585	AT1G07570.1	Symbols: APK1A, APK1 | Protein kinase superfamily protein | chr1:2331369-2333210 REVERSE LENGTH=410	4278.43	1992.44	2176.58	2575.94	2578.22	3394.09	10020.7	3813.07	3375.48	2581.59	2524.67	2934.71	-2.14733	-1.96567	-1.66092	-1.65945	-1.26055	-2.62799	-2.96867	-3.8816	-3.96911	-3.41455
Bra039938	AT2G22900.1	Symbols: | Galactosyl transferase GMA12/MNN10 family protein | chr2:9744359-9746193 REVERSE LENGTH=449	1886.02	899.952	794.396	1385.65	1012.65	1692.53	1718.08	510.423	460.59	592.942	516.448	783.144	-2.09569	-2.37416	-1.36111	-1.86246	-1.11432	-3.36599	-3.73017	-2.89755	-3.32672	-2.19382
Bra013549	AT4G21700.1	Symbols: | Protein of unknown function (DUF2921) | chr4:11529956-11532844 FORWARD LENGTH=962	4014.65	1842.19	1743.16	2068.72	2236.99	2100.57	3920.44	1943.52	1690.03	1797.27	1142.45	1684.71	-2.17928	-2.30309	-1.94064	-1.79467	-1.91122	-2.01719	-2.31975	-2.18133	-3.43161	-2.32707
Bra022222	AT3G17580.1	Symbols: | unknown protein; BEST Arabidopsis thaliana protein match is: unknown protein (TAIR:AT1G48330.1); Has 40 Blast hits to 40 proteins in 11 species: Archae - 0; Bacteria - 0; Metazoa - 0; Fungi - 0; Plants - 40; Viruses - 0; Other Eukaryotes - 0 (source: NCBI BLink). | chr3:6015276-6015518 FORWARD LENGTH=80	924.356	380.404	412.18	472.71	488.38	931.767	1148.36	410.683	427.46	478.593	463.095	498.836	-2.42993	-2.2426	-1.95544	-1.8927	1.00802	-2.79622	-2.68647	-2.39945	-2.47975	-2.30208
Bra037336	AT4G00360.1	Symbols: CYP86A2, ATT1 | cytochrome P450, family 86, subfamily A, polypeptide 2 | chr4:160951-162778 FORWARD LENGTH=553	9690.57	3446.94	4390.22	5775.88	5213.54	7670.31	10989.6	4846.81	3851.72	4645.2	3407.78	4888.57	-2.81135	-2.20731	-1.67777	-1.85873	-1.26339	-2.26739	-2.85317	-2.3658	-3.22486	-2.24802
Bra005229	AT2G36970.1	Symbols: | UDP-Glycosyltransferase superfamily protein | chr2:15529050-15530712 FORWARD LENGTH=490	557.29	251.476	267.548	327.561	484.877	342.879	1054.62	511.691	268.917	232.958	452.13	363.005	-2.21608	-2.08295	-1.70133	-1.14934	-1.62533	-2.06105	-3.92173	-4.52708	-2.33256	-2.90525
Bra025054	AT5G45790.2	Symbols: | Ubiquitin carboxyl-terminal hydrolase family protein | chr5:18572345-18573664 FORWARD LENGTH=439	1963.35	980.385	944.873	987.896	1238.79	1600.98	3072.05	1289.23	1372.9	1524.59	1187.68	1487.24	-2.00263	-2.0779	-1.98741	-1.58489	-1.22634	-2.38286	-2.23764	-2.015	-2.5866	-2.0656
Bra009710	AT5G23860.1	Symbols: TUB8 | tubulin beta 8 | chr5:8042962-8044528 FORWARD LENGTH=449	9193.09	4385.71	4547.09	5522.55	6113.98	5655.2	18724.1	8203.14	8039.24	8588.37	6047.55	6463.61	-2.09615	-2.02175	-1.66465	-1.50362	-1.6256	-2.28255	-2.32909	-2.18017	-3.09615	-2.89685
Bra031528	AT1G60070.1	Symbols: | Adaptor protein complex AP-1, gamma subunit | chr1:22142944-22149296 REVERSE LENGTH=862	568.558	273.534	169.395	146.878	413.029	338.553	1130.28	463.071	435.627	273.95	277.391	254.168	-2.07856	-3.3564	-3.87095	-1.37656	-1.67938	-2.44084	-2.59461	-4.12586	-4.07468	-4.44698
Bra005244	AT2G36790.1	Symbols: UGT73C6 | UDP-glucosyl transferase 73C6 | chr2:15420339-15421826 REVERSE LENGTH=495	876.582	331.515	397.34	254.189	494.605	781.378	1806.69	712.368	576.923	722.453	562.369	542.359	-2.64417	-2.20613	-3.44854	-1.77229	-1.12184	-2.53618	-3.1316	-2.50077	-3.21264	-3.33117
Bra018994	AT1G52855.1	Symbols: | unknown protein; BEST Arabidopsis thaliana protein match is: unknown protein (TAIR:AT3G15534.1); Has 35333 Blast hits to 34131 proteins in 2444 species: Archae - 798; Bacteria - 22429; Metazoa - 974; Fungi - 991; Plants - 531; Viruses - 0; Other Eukaryotes - 9610 (source: NCBI BLink). | chr1:19683137-19683343 REVERSE LENGTH=68	1912.86	654.516	612.275	773.655	1133.84	1381.45	2823.11	952.738	772.017	896.952	561.598	1350.81	-2.92256	-3.12418	-2.4725	-1.68706	-1.38468	-2.96315	-3.6568	-3.14745	-5.02692	-2.08994
Bra023993	AT4G31590.1	Symbols: ATCSLC05, CSLC05, ATCSLC5, CSLC5 | Cellulose-synthase-like C5 | chr4:15309889-15312336 REVERSE LENGTH=692	2135.48	773.571	709.497	1006.95	1092.62	1162.09	1667.51	640.035	661.564	530.066	541.969	519.88	-2.76055	-3.00985	-2.12074	-1.95446	-1.83762	-2.60534	-2.52056	-3.14585	-3.07676	-3.20749
Bra035725	AT5G51120.1	Symbols: PABN1, ATPABN1 | polyadenylate-binding protein 1 | chr5:20779760-20781241 FORWARD LENGTH=227	941.644	339.642	414.688	448.007	546.818	485.207	1134.28	382.479	387.625	393.767	325.72	449.109	-2.77246	-2.27073	-2.10185	-1.72204	-1.94071	-2.9656	-2.92623	-2.88059	-3.48238	-2.52562
Bra002422	AT5G22580.1	Symbols: | Stress responsive A/B Barrel Domain | chr5:7502709-7503137 FORWARD LENGTH=111	10660.2	4909.39	4751.87	5078.54	5679.92	6368.71	7547.08	3543.58	3339.74	2412.16	2533.55	1657.98	-2.17139	-2.24337	-2.09907	-1.87682	-1.67384	-2.12979	-2.25978	-3.12876	-2.97886	-4.55197
Bra026711	AT1G16670.1	Symbols: | Protein kinase superfamily protein | chr1:5697846-5699492 FORWARD LENGTH=390	571.719	151.711	249.813	124.263	112.502	362.812	1347.43	434.979	395.527	459.907	355.929	368.067	-3.76847	-2.28859	-4.60088	-5.08186	-1.5758	-3.09769	-3.40667	-2.92979	-3.78567	-3.66083
Bra032772	AT4G14250.1	Symbols: | structural constituent of ribosome | chr4:8208985-8213237 REVERSE LENGTH=821	571.522	126.025	62.4535	139.655	121.41	439.507	807.089	256.889	196.181	74.7937	106.953	198.984	-4.53499	-9.15116	-4.09238	-4.70737	-1.30037	-3.14178	-4.114	-10.7909	-7.5462	-4.05605
Bra019770	AT1G12480.1	Symbols: OZS1, SLAC1, RCD3, CDI3 | C4-dicarboxylate transporter/malic acid transport protein | chr1:4257427-4259249 REVERSE LENGTH=556	2814.13	530.883	516.933	889.087	781.719	1488.38	1638.85	783.313	607.998	573.22	396.086	626.98	-5.30085	-5.4439	-3.16519	-3.59993	-1.89073	-2.0922	-2.69549	-2.85902	-4.13761	-2.61388
Bra000364	AT2G44790.1	Symbols: UCC2 | uclacyanin 2 | chr2:18462182-18463232 REVERSE LENGTH=202	1240.28	249.491	325.84	363.646	369.902	646.274	4384.84	1000.33	567.11	524.46	434.771	577.581	-4.97124	-3.80641	-3.41068	-3.353	-1.91912	-4.38339	-7.7319	-8.36068	-10.0854	-7.59173
Bra022048	AT5G46600.1	Symbols: | Aluminium activated malate transporter family protein | chr5:18907849-18910742 REVERSE LENGTH=539	14087.2	5424.53	3718.31	5165.91	4476.25	7154.83	7971.42	3142.35	2666.54	2532.84	2023.04	1773.39	-2.59694	-3.7886	-2.72695	-3.1471	-1.96891	-2.53677	-2.98942	-3.14723	-3.94032	-4.49502
Bra029071	AT5G53400.1	Symbols: BOB1 | HSP20-like chaperones superfamily protein | chr5:21661588-21663383 FORWARD LENGTH=304	674.959	108.808	113.556	141.99	216.41	524.849	546.578	117.489	191.802	110.25	224.974	258.606	-6.20321	-5.94384	-4.75357	-3.11889	-1.28601	-4.65216	-2.8497	-4.95762	-2.42952	-2.11355
Bra034774	AT3G12145.1	Symbols: FLR1, FLOR1 | Leucine-rich repeat (LRR) family protein | chr3:3874764-3876075 REVERSE LENGTH=325	4084.8	2018.07	1749.13	1977.46	1420.99	2118.19	2240.49	988.423	996.809	870.738	631.542	605.739	-2.02411	-2.33533	-2.06568	-2.87462	-1.92844	-2.26673	-2.24766	-2.57309	-3.54765	-3.69877
Bra034459	AT1G33811.1	Symbols: | GDSL-like Lipase/Acylhydrolase superfamily protein | chr1:12267918-12269690 FORWARD LENGTH=370	3762.62	818.605	695.136	1727.49	1326.87	2413.84	2195.53	708.589	354.016	478.073	383.402	756.979	-4.59638	-5.41278	-2.17808	-2.83571	-1.55877	-3.09845	-6.20178	-4.59246	-5.72644	-2.90038
Bra027168	AT3G16370.1	Symbols: | GDSL-like Lipase/Acylhydrolase superfamily protein | chr3:5556928-5558351 FORWARD LENGTH=353	6608.05	2470.89	2411.49	3191.65	2370.26	3717.48	4854.76	2234.02	1044.29	1478.94	1167.86	1687.03	-2.67436	-2.74024	-2.07042	-2.7879	-1.77756	-2.1731	-4.64886	-3.28259	-4.15697	-2.8777
Bra016864	AT2G42620.1	Symbols: MAX2, ORE9, PPS | RNI-like superfamily protein | chr2:17756170-17758251 FORWARD LENGTH=693	7096.72	2816.79	2599.48	2963.46	2668.4	3560.76	6238.43	2965.85	2531.16	2307.04	2999.26	3098.46	-2.51944	-2.73005	-2.39474	-2.65954	-1.99304	-2.10342	-2.46465	-2.70408	-2.07999	-2.0134
Bra033428	AT3G52470.1	Symbols: | Late embryogenesis abundant (LEA) hydroxyproline-rich glycoprotein family | chr3:19450750-19451376 FORWARD LENGTH=208	5369.63	2677.8	2088.15	2620.21	2093.47	2787.81	5626.19	2075.03	1895.03	1959.6	1606.3	1413.68	-2.00524	-2.57148	-2.04931	-2.56494	-1.92611	-2.71138	-2.96892	-2.87109	-3.50258	-3.97982
Bra001983	AT2G16630.1	Symbols: | Pollen Ole e 1 allergen and extensin family protein | chr2:7209286-7210872 FORWARD LENGTH=359	2390.07	537.353	598.998	1164.68	936.528	1552.44	1416.82	486.837	479.128	498.664	427.968	699.617	-4.44786	-3.99011	-2.05213	-2.55205	-1.53956	-2.91026	-2.95708	-2.84123	-3.31057	-2.02514
Bra012097	AT5G65650.1	Symbols: | Protein of unknown function (DUF1195) | chr5:26239588-26241195 FORWARD LENGTH=185	10854.6	3920.19	3628.32	5085.66	4710.93	5900.97	11523.6	4969.99	3200.1	3573.63	2756.27	3461.09	-2.7689	-2.99163	-2.13435	-2.30413	-1.83946	-2.31864	-3.60101	-3.22462	-4.18087	-3.32947
Bra032717	AT1G61730.1	Symbols: | DNA-binding storekeeper protein-related transcriptional regulator | chr1:22793447-22794577 REVERSE LENGTH=376	4098.89	1657.4	1321.1	1629.91	1964.78	2055.7	5434.4	1982.13	2024.04	2535.56	2221.53	2640.62	-2.47308	-3.10263	-2.5148	-2.08618	-1.99391	-2.7417	-2.68493	-2.14327	-2.44624	-2.058
Bra011963	AT2G28260.1	Symbols: ATCNGC15, CNGC15 | cyclic nucleotide-gated channel 15 | chr2:12049989-12052453 FORWARD LENGTH=678	1587.83	438.322	365.619	789.951	769.703	967.483	1132.71	366.608	273.25	397.352	231.419	343.629	-3.62252	-4.34285	-2.01004	-2.06291	-1.6412	-3.0897	-4.14532	-2.85065	-4.89463	-3.29632
Bra024554	AT1G22960.1	Symbols: | Pentatricopeptide repeat (PPR) superfamily protein | chr1:8128086-8130242 REVERSE LENGTH=718	3416.27	1311.23	1441.89	1523.71	1685.21	1919.3	4742.79	1609.47	2029.03	2005.73	1613.42	1930.04	-2.60539	-2.3693	-2.24207	-2.02721	-1.77996	-2.9468	-2.33747	-2.36462	-2.93959	-2.45735
Bra020706	AT5G27060.1	Symbols: AtRLP53, RLP53 | receptor like protein 53 | chr5:9522534-9525407 REVERSE LENGTH=957	3043.83	96.6969	63.7297	37.1574	68.0144	61.5208	1928.85	205.794	69.8221	64.9693	64.2794	71.3572	-31.4781	-47.7616	-81.9172	-44.7527	-49.4764	-9.37272	-27.6252	-29.6886	-30.0073	-27.0309
Bra004833	AT3G60120.1	Symbols: BGLU27 | beta glucosidase 27 | chr3:22206238-22208952 FORWARD LENGTH=540	2472.04	94.7141	187.526	106.454	76.2235	52.2992	824.53	99.1405	75.5875	83.7411	64.312	51.3868	-26.1	-13.1824	-23.2217	-32.4315	-47.2673	-8.31678	-10.9083	-9.84618	-12.8208	-16.0456
Bra016678	AT1G14890.1	Symbols: | Plant invertase/pectin methylesterase inhibitor superfamily protein | chr1:5137045-5137704 FORWARD LENGTH=219	6325.84	237.477	276.713	284.645	159.202	140.404	3297.9	195.949	214.194	222.812	116.029	108.549	-26.6377	-22.8607	-22.2236	-39.7347	-45.0546	-16.8304	-15.3968	-14.8013	-28.4231	-30.3817
Bra017351	AT3G25770.1	Symbols: AOC2 | allene oxide cyclase 2 | chr3:9406975-9407839 FORWARD LENGTH=253	2009.85	235.091	189.615	105.929	202.65	45.6696	1711.68	544.307	393.786	193.052	129.181	75.4541	-8.54924	-10.5996	-18.9736	-9.91784	-44.0085	-3.1447	-4.34673	-8.86642	-13.2502	-22.685
Bra001122	AT3G04720.1	Symbols: PR4, HEL, PR-4 | pathogenesis-related 4 | chr3:1285691-1286531 REVERSE LENGTH=212	2228.39	107.183	523.012	187.829	138.603	61.8151	601.21	178.998	46.397	143.366	66.8641	196.42	-20.7905	-4.26069	-11.8639	-16.0775	-36.0493	-3.35875	-12.9579	-4.19353	-8.99152	-3.06084
Bra033532	NA	NA	867.002	47.1072	28.3252	43.1937	24.4474	24.9465	2533.23	1009.97	719.98	676.895	423.942	541.601	-18.4049	-30.6089	-20.0724	-35.464	-34.7545	-2.50822	-3.51847	-3.74243	-5.97542	-4.6773
Bra003273	AT3G57240.1	Symbols: BG3 | beta-1,3-glucanase 3 | chr3:21181916-21183045 REVERSE LENGTH=341	3112.51	126.133	1130.64	590.026	219.543	94.4924	3397.83	1037.63	915.183	1129.96	348.552	740.404	-24.6764	-2.75287	-5.27521	-14.1772	-32.9393	-3.27461	-3.71273	-3.00704	-9.74842	-4.58916
Bra021433	AT3G02550.1	Symbols: LBD41 | LOB domain-containing protein 41 | chr3:536747-537650 REVERSE LENGTH=263	14860.3	842.435	913.202	990.976	972.682	480.999	12019.5	1664.77	1669.47	1279.14	1007.25	853.156	-17.6397	-16.2727	-14.9956	-15.2777	-30.8947	-7.21992	-7.19959	-9.39655	-11.933	-14.0883
Bra031721	AT1G10585.1	Symbols: | basic helix-loop-helix (bHLH) DNA-binding superfamily protein | chr1:3494115-3495104 REVERSE LENGTH=181	2552.38	88.7736	132.481	141.721	168.081	84.8757	2958.43	796.525	141.581	150.247	106.445	76.8401	-28.7516	-19.266	-18.0099	-15.1854	-30.072	-3.71417	-20.8957	-19.6904	-27.793	-38.5011
Bra000775	AT4G12480.1	Symbols: pEARLI 1 | Bifunctional inhibitor/lipid-transfer protein/seed storage 2S albumin superfamily protein | chr4:7406371-7406877 REVERSE LENGTH=168	7944.91	469.349	599.68	497.886	547.85	284.738	7846.18	939.619	836.415	900.39	579.914	596.774	-16.9275	-13.2486	-15.9573	-14.502	-27.9025	-8.35038	-9.38073	-8.7142	-13.5299	-13.1477
Bra013399	AT4G19460.1	Symbols: | UDP-Glycosyltransferase superfamily protein | chr4:10610422-10611972 REVERSE LENGTH=516	897.558	20.3346	28.1905	22.7743	19.0389	34.3208	577.563	29.3405	20.6003	14.2774	17.6425	19.9153	-44.1394	-31.839	-39.411	-47.1434	-26.152	-19.6848	-28.0366	-40.453	-32.737	-29.001
Bra040363	AT3G07130.1	Symbols: ATPAP15, PAP15 | purple acid phosphatase 15 | chr3:2255763-2257981 REVERSE LENGTH=532	8384.25	900.099	675.219	564.785	726.099	355.998	521.505	188.748	198.821	82.154	34.9733	45.2324	-9.31481	-12.4171	-14.845	-11.547	-23.5514	-2.76297	-2.62299	-6.3479	-14.9115	-11.5295
Bra007071	AT3G54420.1	Symbols: ATEP3, ATCHITIV, CHIV, EP3 | homolog of carrot EP3-3 chitinase | chr3:20145935-20147034 FORWARD LENGTH=273	4770.27	580.615	517.657	374.053	347.208	205.487	4770.39	1166.37	1094.62	892.91	714.994	612.522	-8.21589	-9.21512	-12.7529	-13.7389	-23.2145	-4.08995	-4.35803	-5.34252	-6.67193	-7.78811
Bra020878	AT4G20970.1	Symbols: | basic helix-loop-helix (bHLH) DNA-binding superfamily protein | chr4:11215259-11216212 FORWARD LENGTH=190	1444.59	81.703	188.748	215.21	218.339	63.915	2331.68	521.016	497.914	423.757	247.744	235.506	-17.681	-7.65354	-6.71247	-6.61627	-22.6017	-4.47526	-4.6829	-5.5024	-9.41165	-9.90072
Bra006195	AT5G13330.1	Symbols: Rap2.6L | related to AP2 6l | chr5:4272384-4274461 FORWARD LENGTH=212	1500.85	142.677	138.964	108.61	145.018	73.067	869.248	240.707	156.739	35.2637	162.37	163.248	-10.5192	-10.8003	-13.8187	-10.3494	-20.5407	-3.61123	-5.54583	-24.6499	-5.3535	-5.32471
Bra020862	AT4G21910.2	Symbols: | MATE efflux family protein | chr4:11625742-11629253 REVERSE LENGTH=509	2380.85	246.562	350.97	327.871	295.257	116.162	714.979	105.107	89.7746	78.5078	107.604	103.098	-9.65619	-6.78363	-7.26154	-8.06365	-20.4959	-6.80239	-7.96416	-9.10711	-6.64454	-6.93495
Bra027991	AT4G10270.1	Symbols: | Wound-responsive family protein | chr4:6374805-6375077 FORWARD LENGTH=90	20831	871.168	1080.14	992.911	1153.26	1106.58	14957.4	1672.11	1505.13	1538.94	1091.8	1092.83	-23.9116	-19.2855	-20.9797	-18.0627	-18.8247	-8.94522	-9.93761	-9.71929	-13.6998	-13.6868
Bra001644	AT3G16870.1	Symbols: GATA17 | GATA transcription factor 17 | chr3:5763752-5764576 REVERSE LENGTH=190	7258.69	562.202	698.98	542.674	527.727	388.489	4321.65	787.044	784.583	858.306	287.319	369.7	-12.9112	-10.3847	-13.3758	-13.7546	-18.6844	-5.49099	-5.50821	-5.03509	-15.0413	-11.6896
Bra013478	AT4G20860.1	Symbols: | FAD-binding Berberine family protein | chr4:11172726-11174318 FORWARD LENGTH=530	4203	671.982	646.119	721.212	587.378	225.46	3933.85	440.424	394.719	412.905	321.959	325.106	-6.25463	-6.50499	-5.82769	-7.15553	-18.6419	-8.93196	-9.9662	-9.52725	-12.2185	-12.1002
Bra017132	AT2G38240.1	Symbols: | 2-oxoglutarate (2OG) and Fe(II)-dependent oxygenase superfamily protein | chr2:16012723-16014666 REVERSE LENGTH=353	6501.14	334.941	626.385	378.792	548.376	358.228	6310.99	2646.72	513.442	1335.2	1736.52	2145.47	-19.4098	-10.3788	-17.1628	-11.8553	-18.1481	-2.38446	-12.2915	-4.72663	-3.63427	-2.94154
Bra028711	AT5G07010.1	Symbols: ATST2A, ST2A | sulfotransferase 2A | chr5:2174960-2176039 REVERSE LENGTH=359	10351.9	386.094	617.95	483.584	927.58	574.136	9024.23	623.174	785.961	645.136	341.341	302.895	-26.8119	-16.752	-21.4066	-11.1601	-18.0304	-14.4811	-11.4818	-13.9881	-26.4376	-29.7933
Bra024325	AT5G64750.1	Symbols: ABR1 | Integrase-type DNA-binding superfamily protein | chr5:25891679-25893656 FORWARD LENGTH=391	2251.75	77.4478	138.055	125.472	182.229	126.176	1169.5	140.999	108.604	170.641	57.9665	80.2983	-29.0744	-16.3105	-17.9462	-12.3567	-17.8461	-8.29439	-10.7685	-6.85357	-20.1754	-14.5644
Bra017702	AT4G35180.1	Symbols: LHT7 | LYS/HIS transporter 7 | chr4:16738517-16740385 REVERSE LENGTH=478	764.422	74.1338	58.8876	86.6723	35.7032	43.4853	899.01	233.385	73.3311	82.7707	50.5889	47.9839	-10.3114	-12.981	-8.81968	-21.4105	-17.5789	-3.85205	-12.2596	-10.8615	-17.7709	-18.7357
Bra002986	AT5G54470.1	Symbols: | B-box type zinc finger family protein | chr5:22114584-22115315 REVERSE LENGTH=215	3236.33	538.486	650.368	344.271	374.192	184.237	4262.37	2055.43	1803.11	1547.23	1388.55	1326.13	-6.01005	-4.97615	-9.40053	-8.64885	-17.5661	-2.07371	-2.3639	-2.75484	-3.06966	-3.21414
Bra024717	AT1G26420.1	Symbols: | FAD-binding Berberine family protein | chr1:9141715-9143304 REVERSE LENGTH=529	502.729	43.2877	66.1692	62.6219	69.2958	28.8677	895.812	116.866	75.9462	157.85	57.7388	68.7259	-11.6137	-7.59763	-8.02801	-7.25483	-17.4149	-7.66529	-11.7953	-5.67508	-15.5149	-13.0346
Bra038929	AT1G58170.1	Symbols: | Disease resistance-responsive (dirigent-like protein) family protein | chr1:21536188-21536745 FORWARD LENGTH=185	1521.96	151.604	131.685	164.516	100.718	88.111	1735.5	600.938	263.96	373.293	274.534	109.075	-10.039	-11.5576	-9.25114	-15.1111	-17.2732	-2.88799	-6.57486	-4.64916	-6.32162	-15.9111
Bra017066	AT2G39518.1	Symbols: | Uncharacterised protein family (UPF0497) | chr2:16496029-16496937 REVERSE LENGTH=174	11391.9	1331.35	1601.29	931.054	1030.25	675.83	10247.8	2741.02	1457.3	1607.49	677.222	569.576	-8.55665	-7.1142	-12.2355	-11.0574	-16.8562	-3.73868	-7.03205	-6.37503	-15.1321	-17.992
Bra014547	AT3G59220.1	Symbols: PRN, PRN1, ATPIRIN1 | pirin | chr3:21894205-21895501 FORWARD LENGTH=287	5752.62	263.321	443.046	364.83	441.169	344.781	7808.08	789.845	490.018	422.062	493.534	231.998	-21.8464	-12.9842	-15.7679	-13.0395	-16.6849	-9.88559	-15.9343	-18.4998	-15.8208	-33.6558
Bra012614	AT4G18170.1	Symbols: WRKY28, ATWRKY28 | WRKY DNA-binding protein 28 | chr4:10061508-10062691 FORWARD LENGTH=318	1496.92	191.173	197.895	208.189	158.887	90.0431	506.405	150.238	87.6821	132.599	102.867	128.393	-7.83019	-7.56421	-7.1902	-9.42129	-16.6245	-3.37069	-5.77547	-3.81907	-4.92291	-3.94418
Bra003450	AT3G61460.1	Symbols: BRH1 | brassinosteroid-responsive RING-H2 | chr3:22741701-22742213 REVERSE LENGTH=170	6354.91	376.332	327.549	406.762	561.292	382.82	3106.65	408.509	387.279	429.771	318.044	304.243	-16.8864	-19.4014	-15.6232	-11.3219	-16.6003	-7.60485	-8.02174	-7.22862	-9.76799	-10.2111
Bra037381	AT4G01140.1	Symbols: | Protein of unknown function (DUF1191) | chr4:491012-491932 REVERSE LENGTH=306	1060.23	165.719	134.467	137.544	113.331	68.639	1167.64	460.321	145.064	182.455	51.0854	42.8171	-6.39776	-7.88469	-7.7083	-9.35516	-15.4465	-2.53658	-8.04914	-6.39961	-22.8566	-27.2704
Bra023127	AT1G30740.1	Symbols: | FAD-binding Berberine family protein | chr1:10903029-10904630 FORWARD LENGTH=533	559.095	106.159	88.8785	58.173	47.2723	36.3429	740.872	261.74	132.861	172.891	121.74	153.98	-5.26658	-6.29055	-9.6109	-11.8271	-15.3839	-2.83056	-5.57629	-4.2852	-6.08569	-4.81148
Bra003161	AT3G53960.1	Symbols: | Major facilitator superfamily protein | chr3:19978306-19980886 REVERSE LENGTH=602	5697.75	672.239	493.915	367.073	848.821	374.006	1096.79	223.878	142.439	151.044	309.145	263.535	-8.47578	-11.5359	-15.5221	-6.71255	-15.2344	-4.89905	-7.70007	-7.26139	-3.54782	-4.16184
Bra034061	AT3G09270.1	Symbols: ATGSTU8, GSTU8 | glutathione S-transferase TAU 8 | chr3:2848407-2849226 REVERSE LENGTH=224	683.262	42.5779	73.0461	58.8624	82.8411	44.981	852.016	183.117	127.437	112.522	87.3295	103.486	-16.0473	-9.35385	-11.6078	-8.24786	-15.19	-4.65285	-6.68578	-7.57199	-9.75634	-8.23315
Bra007225	AT3G56200.1	Symbols: | Transmembrane amino acid transporter family protein | chr3:20850087-20851779 FORWARD LENGTH=435	10751.3	1421.43	1452.89	1348.71	1185.67	727.858	6584.13	996.541	1093.64	1145.85	571.524	640.148	-7.56372	-7.39994	-7.97154	-9.0677	-14.7712	-6.60698	-6.02038	-5.74607	-11.5203	-10.2853
Bra003636	AT1G78820.1	Symbols: | D-mannose binding lectin protein with Apple-like carbohydrate-binding domain | chr1:29634401-29635768 REVERSE LENGTH=455	7757.14	1052.48	931.713	1022.08	626.754	526.303	7898.51	468.193	346.22	347.294	340.076	308.757	-7.37034	-8.32568	-7.58956	-12.3767	-14.7389	-16.8702	-22.8136	-22.743	-23.2257	-25.5816
Bra017160	AT2G37700.1	Symbols: | Fatty acid hydroxylase superfamily | chr2:15810581-15814176 REVERSE LENGTH=613	3990.47	675.546	603.264	546.609	554.452	273.101	1691.18	131.251	156.029	132.495	80.2592	118.753	-5.90703	-6.6148	-7.30041	-7.19714	-14.6117	-12.8851	-10.8389	-12.7641	-21.0715	-14.2412
Bra030416	AT1G51800.1	Symbols: | Leucine-rich repeat protein kinase family protein | chr1:19214203-19217833 FORWARD LENGTH=894	4110.52	370.815	319.913	152.764	139.719	282.174	2108.11	269.647	82.9084	69.4828	68.2341	142.369	-11.0851	-12.8489	-26.9076	-29.4199	-14.5673	-7.81804	-25.427	-30.34	-30.8953	-14.8074
Bra027992	AT4G10270.1	Symbols: | Wound-responsive family protein | chr4:6374805-6375077 FORWARD LENGTH=90	15541.4	857.202	1063.36	1033.13	1231.4	1096.46	16427.2	1865.41	1697.51	1544.42	819.268	1234	-18.1304	-14.6154	-15.043	-12.6209	-14.1742	-8.80621	-9.67723	-10.6365	-20.0511	-13.3122
Bra017491	AT5G47330.1	Symbols: | alpha/beta-Hydrolases superfamily protein | chr5:19207170-19208711 FORWARD LENGTH=314	10259	1065.63	1061.35	1034.58	779.738	724.034	10671.4	3633.48	3013.05	2932.26	1289.7	1112.84	-9.62717	-9.66599	-9.9161	-13.157	-14.1692	-2.93696	-3.54173	-3.63931	-8.27433	-9.58934
Bra016930	AT2G41480.1	Symbols: | Peroxidase superfamily protein | chr2:17296986-17298729 REVERSE LENGTH=341	1925.6	459.455	290.026	259.065	197.489	138.452	2271.34	504.311	342.294	344.039	148.705	84.2765	-4.19105	-6.6394	-7.43288	-9.75042	-13.9081	-4.50385	-6.63564	-6.60198	-15.2741	-26.951
Bra011509	AT3G57230.2	Symbols: AGL16 | AGAMOUS-like 16 | chr3:21177710-21180671 FORWARD LENGTH=239	1084.64	303.181	258.24	157.019	132.471	78.6192	1395.57	357.836	318.103	201.212	206.247	71.992	-3.57753	-4.20012	-6.9077	-8.18775	-13.7961	-3.90003	-4.38716	-6.93582	-6.7665	-19.3851
Bra032171	AT2G23200.1	Symbols: | Protein kinase superfamily protein | chr2:9879351-9881855 FORWARD LENGTH=834	2155.6	283.635	229.395	262.369	240.751	156.897	706.313	277.697	245.145	278.455	208.641	172.22	-7.59991	-9.39689	-8.21591	-8.95365	-13.7389	-2.54347	-2.88121	-2.53654	-3.3853	-4.10123
Bra000122	AT2G39200.1	Symbols: MLO12, ATMLO12 | Seven transmembrane MLO family protein | chr2:16356255-16359797 REVERSE LENGTH=576	679.155	228.753	204.683	336.603	221.416	49.7027	804.552	244.488	264.289	279.544	216.005	209.007	-2.96894	-3.31808	-2.01767	-3.06733	-13.6643	-3.29076	-3.04421	-2.87809	-3.72469	-3.8494
Bra026180	AT1G14890.1	Symbols: | Plant invertase/pectin methylesterase inhibitor superfamily protein | chr1:5137045-5137704 FORWARD LENGTH=219	3694.28	539.618	522.443	473.713	1278.89	271.964	2903.69	643.498	557.739	456.699	750.237	531.127	-6.8461	-7.07116	-7.79856	-2.88866	-13.5837	-4.51235	-5.20618	-6.358	-3.87036	-5.46704
Bra034666	AT4G34950.1	Symbols: | Major facilitator superfamily protein | chr4:16642544-16644759 REVERSE LENGTH=567	1711.75	372.329	313.432	325.071	299.13	127.511	1509.95	586.058	171.701	175.33	71.9277	54.2825	-4.59741	-5.46131	-5.26577	-5.72243	-13.4243	-2.57645	-8.79407	-8.61205	-20.9926	-27.8165
Bra026124	AT1G15520.1	Symbols: PDR12, ATPDR12, ABCG40, ATABCG40 | pleiotropic drug resistance 12 | chr1:5331993-5338175 REVERSE LENGTH=1423	2701.48	999.032	774.607	418.487	335.626	204.59	2259.79	943.156	668.96	333.211	178.627	141.195	-2.7041	-3.48755	-6.45535	-8.04908	-13.2044	-2.39599	-3.37806	-6.78186	-12.6509	-16.0047
Bra037480	AT5G48540.1	Symbols: | receptor-like protein kinase-related family protein | chr5:19669096-19669887 REVERSE LENGTH=263	3507.07	761.636	508.013	552.153	305.845	272.854	2317.18	299.231	256.727	276.631	247.628	200.582	-4.60465	-6.9035	-6.35163	-11.4668	-12.8533	-7.74378	-9.02585	-8.37643	-9.3575	-11.5523
Bra021802	AT2G32660.1	Symbols: AtRLP22, RLP22 | receptor like protein 22 | chr2:13853897-13855666 REVERSE LENGTH=589	4021.01	636.661	771.515	794.14	683.198	314.996	2958.9	439.079	251.08	300.726	103.126	175.862	-6.31578	-5.21184	-5.06335	-5.88557	-12.7653	-6.73888	-11.7847	-9.83919	-28.6921	-16.8251
Bra024795	AT2G02990.1	Symbols: RNS1, ATRNS1 | ribonuclease 1 | chr2:873714-874667 FORWARD LENGTH=230	4800.42	609.578	868.748	397.765	456.869	376.534	3892.69	1326.69	779.257	598.898	301.69	305.285	-7.87499	-5.52568	-12.0685	-10.5072	-12.749	-2.93414	-4.99539	-6.49975	-12.9029	-12.751
Bra031136	AT2G20670.1	Symbols: | Protein of unknown function (DUF506) | chr2:8912163-8913472 REVERSE LENGTH=294	5551.25	1957.1	1844.07	974.04	725.323	444.959	9133.17	2556.94	1156.74	877.86	628.539	636.598	-2.83647	-3.01032	-5.6992	-7.65349	-12.4759	-3.57191	-7.89561	-10.4039	-14.5308	-14.3468
Bra035722	AT5G51050.1	Symbols: | Mitochondrial substrate carrier family protein | chr5:20753381-20755714 FORWARD LENGTH=487	875.36	270.367	220.69	156.746	156.138	70.4556	871.394	428.843	301.99	350.674	133.048	196.407	-3.23767	-3.96647	-5.58458	-5.60632	-12.4243	-2.03197	-2.88551	-2.48491	-6.54947	-4.43667
Bra018157	AT3G47380.1	Symbols: | Plant invertase/pectin methylesterase inhibitor superfamily protein | chr3:17457795-17458403 FORWARD LENGTH=202	503.71	28.243	31.3179	31.583	109.112	40.6307	639.969	63.9433	31.4031	37.3181	78.1695	37.1729	-17.8349	-16.0838	-15.9488	-4.61645	-12.3973	-10.0084	-20.3792	-17.149	-8.18694	-17.216
Bra012586	AT4G18570.1	Symbols: | Tetratricopeptide repeat (TPR)-like superfamily protein | chr4:10231439-10234534 FORWARD LENGTH=642	2161.85	309.912	278.802	309.493	263.21	177.413	1052.08	417.103	283.798	296.218	343.801	384.718	-6.97569	-7.75407	-6.98513	-8.2134	-12.1854	-2.52235	-3.70714	-3.55171	-3.06014	-2.73468
Bra038577	AT1G61340.1	Symbols: | F-box family protein | chr1:22628526-22629741 FORWARD LENGTH=185	1588.7	288.408	263.313	233.738	188.544	135.402	1016.51	372.758	275.663	227.487	145.733	159.578	-5.50852	-6.0335	-6.79693	-8.42615	-11.7332	-2.727	-3.68751	-4.46843	-6.97515	-6.36999
Bra035596	AT5G55930.1	Symbols: ATOPT1, OPT1 | oligopeptide transporter 1 | chr5:22652988-22655827 FORWARD LENGTH=755	10437.3	1512.78	2066.93	1338.68	2064.07	902.712	7189	3381.63	3060.17	2636.96	1971.21	1709.8	-6.89942	-5.04966	-7.79671	-5.05666	-11.5622	-2.1259	-2.34922	-2.72625	-3.647	-4.20459
Bra008127	AT1G74020.1	Symbols: SS2 | strictosidine synthase 2 | chr1:27835289-27837277 REVERSE LENGTH=335	1322.12	267.444	233.82	266.227	140.943	114.562	3055.07	407.824	304.064	302.437	287.19	190.353	-4.94354	-5.65444	-4.96614	-9.38053	-11.5407	-7.49115	-10.0475	-10.1015	-10.6378	-16.0495
Bra002151	AT5G18290.1	Symbols: SIP1;2, SIP1B | Aquaporin-like superfamily protein | chr5:6055198-6056407 REVERSE LENGTH=243	2612.24	299.77	344.905	259.302	222.054	226.424	2208.91	361.135	288.41	472.729	228.689	116.427	-8.71415	-7.5738	-10.0741	-11.764	-11.5369	-6.11658	-7.65892	-4.67268	-9.65901	-18.9725
Bra004826	AT2G44370.1	Symbols: | Cysteine/Histidine-rich C1 domain family protein | chr2:18322102-18322854 REVERSE LENGTH=250	3524.56	412.691	474.913	402.581	526.831	307.472	3359.11	698.849	218.915	251.259	160.826	355.311	-8.54043	-7.42149	-8.75491	-6.69012	-11.463	-4.80663	-15.3444	-13.3691	-20.8866	-9.454
Bra038799	AT4G20830.2	Symbols: | FAD-binding Berberine family protein | chr4:11155486-11157108 FORWARD LENGTH=540	1860.78	235.802	325.755	210.778	234.045	164.414	1513.98	351.507	291.288	331.925	285.444	318.705	-7.89128	-5.71221	-8.82815	-7.95052	-11.3176	-4.30711	-5.19754	-4.56121	-5.30395	-4.75041
Bra002305	AT5G20480.1	Symbols: EFR | EF-TU receptor | chr5:6922497-6925679 FORWARD LENGTH=1031	6141.11	593.71	593.201	621.331	598.84	544.347	2825.87	605.508	357.16	347.63	358.016	299.746	-10.3436	-10.3525	-9.8838	-10.255	-11.2816	-4.66694	-7.91206	-8.12896	-7.89314	-9.42755
Bra013144	AT5G41750.1	Symbols: | Disease resistance protein (TIR-NBS-LRR class) family | chr5:16694047-16697527 FORWARD LENGTH=1068	1051.6	181.038	70.9037	99.6031	124.846	96.3245	1808.47	611.989	346.968	287.639	281.072	337.11	-5.80873	-14.8314	-10.5579	-8.42318	-10.9173	-2.95507	-5.21221	-6.28729	-6.43419	-5.36463
Bra033722	AT1G03870.1	Symbols: FLA9 | FASCICLIN-like arabinoogalactan 9 | chr1:982625-983368 REVERSE LENGTH=247	2628.1	629.572	423.942	346.084	265.721	240.964	1807.93	561.266	374.46	548.748	335.036	278.784	-4.17442	-6.1992	-7.59382	-9.89045	-10.9066	-3.22116	-4.8281	-3.29465	-5.39623	-6.48506
Bra007315	AT3G57260.1	Symbols: BGL2, PR2, BG2, PR-2 | beta-1,3-glucanase 2 | chr3:21188709-21189822 REVERSE LENGTH=339	2107.56	239.536	833.804	388.025	358.297	195.381	1009.65	348.68	256.384	225.025	128.37	279.305	-8.79851	-2.52764	-5.43151	-5.88216	-10.7869	-2.89563	-3.93804	-4.48683	-7.86516	-3.61487
Bra013530	AT4G21500.1	Symbols: | unknown protein; FUNCTIONS IN: molecular_function unknown; INVOLVED IN: biological_process unknown; LOCATED IN: endomembrane system; BEST Arabidopsis thaliana protein match is: unknown protein (TAIR:AT4G05018.1); Has 20 Blast hits to 20 proteins in 8 species: Archae - 0; Bacteria - 0; Metazoa - 0; Fungi - 0; Plants - 17; Viruses - 0; Other Eukaryotes - 3 (source: NCBI BLink). | chr4:11…	1223.69	142.738	106.389	159.872	110.685	113.549	671.375	152.609	93.2367	112.909	144.707	142.747	-8.57298	-11.502	-7.65419	-11.0556	-10.7768	-4.39931	-7.20076	-5.94616	-4.63955	-4.70325
Bra003102	AT5G52882.1	Symbols: | P-loop containing nucleoside triphosphate hydrolases superfamily protein | chr5:21434155-21438362 REVERSE LENGTH=829	710.08	143.124	181.612	131.053	66.9468	66.2891	982.802	188.834	218.778	186.213	144.206	116.032	-4.96129	-3.90987	-5.41827	-10.6066	-10.7119	-5.20458	-4.49223	-5.27784	-6.81526	-8.47009
Bra038045	NA	NA	1922.87	202.025	188.394	222.646	265.721	180.439	1565.09	370.859	107.81	194.821	133.287	376.794	-9.51798	-10.2066	-8.63645	-7.23642	-10.6566	-4.22018	-14.5171	-8.03348	-11.7423	-4.1537
Bra004751	AT2G43190.1	Symbols: | ribonuclease P family protein | chr2:17956220-17957833 FORWARD LENGTH=296	1002.69	101.844	97.3929	106.03	115.503	94.9573	680.33	208.672	138.994	163.555	250.201	102.099	-9.84535	-10.2953	-9.45666	-8.68107	-10.5594	-3.26028	-4.89467	-4.15964	-2.71913	-6.66343
Bra014886	AT1G30720.1	Symbols: | FAD-binding Berberine family protein | chr1:10898197-10899780 FORWARD LENGTH=527	2808.5	671.871	676.325	570.557	615.665	269.327	3371.28	1314.69	354.498	401.53	231.276	403.923	-4.18012	-4.15259	-4.92238	-4.56173	-10.4278	-2.56432	-9.51001	-8.39608	-14.5769	-8.34634
Bra030513	AT1G02900.1	Symbols: RALFL1, RALF1, ATRALF1 | rapid alkalinization factor 1 | chr1:653976-654338 REVERSE LENGTH=120	6192.24	483.87	433.037	521.497	571.893	594.924	5877.3	1878.36	585.156	960.694	642.173	579.828	-12.7973	-14.2996	-11.874	-10.8276	-10.4085	-3.12895	-10.044	-6.11776	-9.15221	-10.1363
Bra009516	AT5G03700.1	Symbols: | D-mannose binding lectin protein with Apple-like carbohydrate-binding domain | chr5:965874-967322 REVERSE LENGTH=482	2808.32	173.785	268.627	260.656	277.395	272.554	1803.89	273.498	268.018	256.087	184.128	174.525	-16.1597	-10.4543	-10.774	-10.1239	-10.3037	-6.59562	-6.73048	-7.04405	-9.79693	-10.336
Bra005197	AT2G37430.1	Symbols: | C2H2 and C2HC zinc fingers superfamily protein | chr2:15706454-15706990 FORWARD LENGTH=178	858.016	178.665	151.322	142.201	131.92	83.815	1464.56	204.461	45.8958	54.3342	28.4456	31.3542	-4.80237	-5.67013	-6.03383	-6.50406	-10.237	-7.16303	-31.9105	-26.9547	-51.4863	-46.7102
Bra036873	AT4G13820.1	Symbols: | Leucine-rich repeat (LRR) family protein | chr4:8008535-8010694 REVERSE LENGTH=719	3099.83	403.243	411.039	361.562	338.802	303.22	2856.15	678.514	455.749	636.249	368.888	423.882	-7.68725	-7.54145	-8.57344	-9.14939	-10.223	-4.20942	-6.26694	-4.48904	-7.74259	-6.73808
Bra018808	AT1G49650.1	Symbols: | alpha/beta-Hydrolases superfamily protein | chr1:18377363-18378487 REVERSE LENGTH=374	964.625	318.534	183.396	143.748	122.595	94.7495	1530.48	569.405	396.922	459.34	339.792	303.741	-3.02833	-5.25979	-6.71053	-7.86839	-10.1808	-2.68786	-3.85587	-3.33191	-4.50417	-5.03877
Bra027994	AT4G10270.1	Symbols: | Wound-responsive family protein | chr4:6374805-6375077 FORWARD LENGTH=90	13254.2	1152.46	1166.42	1050.73	1140.18	1309.62	10718.8	1434.17	1457	1341.63	999.635	779.692	-11.5008	-11.3631	-12.6143	-11.6247	-10.1206	-7.47387	-7.35676	-7.98939	-10.7227	-13.7475
Bra018076	AT5G08640.1	Symbols: FLS, ATFLS1, FLS1 | flavonol synthase 1 | chr5:2804009-2805175 FORWARD LENGTH=336	721.497	194.854	136.176	152.847	88.7975	71.3476	1471.57	582.154	410.209	361.375	210.369	169.529	-3.70276	-5.29827	-4.72039	-8.12519	-10.1124	-2.5278	-3.58737	-4.07214	-6.99518	-8.68034
Bra007437	AT3G59220.1	Symbols: PRN, PRN1, ATPIRIN1 | pirin | chr3:21894205-21895501 FORWARD LENGTH=287	5881.75	460.346	655.939	484.751	740.348	584.549	1744.17	424.107	294.265	303.322	556.58	542.544	-12.7768	-8.96692	-12.1335	-7.94457	-10.062	-4.11257	-5.92721	-5.75023	-3.13373	-3.2148
Bra002927	AT5G55180.2	Symbols: | O-Glycosyl hydrolases family 17 protein | chr5:22388834-22390561 FORWARD LENGTH=465	527.266	114.766	199.035	107.469	85.6495	52.8157	762.49	320.148	284.427	225.803	207.593	142.637	-4.59427	-2.64911	-4.90621	-6.15609	-9.98313	-2.38168	-2.68079	-3.37679	-3.673	-5.34567
Bra037422	NA	NA	10416.2	1388.2	1301.41	1644.19	1164.99	1049.41	12325.1	2080.47	1311.16	1315.52	1011.84	869.302	-7.50339	-8.00378	-6.33516	-8.94102	-9.92577	-5.92419	-9.40015	-9.36899	-12.1809	-14.1782
Bra039532	AT3G47110.1	Symbols: | Leucine-rich repeat protein kinase family protein | chr3:17347103-17350296 REVERSE LENGTH=1025	540.74	92.8548	126.351	84.4577	80.4044	54.7487	621.521	225.361	101.593	139.086	48.124	236.904	-5.8235	-4.27967	-6.40249	-6.72525	-9.87676	-2.75789	-6.11775	-4.46861	-12.915	-2.62351
Bra032954	AT3G26810.1	Symbols: AFB2 | auxin signaling F-box 2 | chr3:9868342-9870464 FORWARD LENGTH=575	8676.56	1850.09	1963.48	1403.29	1595.52	880.558	7487.75	2644.63	2536.87	1939.22	1234.02	1368.97	-4.6898	-4.41897	-6.18301	-5.43808	-9.85348	-2.8313	-2.95157	-3.86122	-6.06777	-5.46962
Bra001290	AT3G10040.1	Symbols: | sequence-specific DNA binding transcription factors | chr3:3096580-3097875 REVERSE LENGTH=431	2225.49	205.406	238.359	211.62	306.565	228.253	1202.77	227.442	221.841	243.042	250.193	201.905	-10.8346	-9.33671	-10.5164	-7.25944	-9.7501	-5.28825	-5.42177	-4.94882	-4.80737	-5.95711
Bra002022	AT2G13100.1	Symbols: | Major facilitator superfamily protein | chr2:5390206-5391764 FORWARD LENGTH=493	5927.48	982.785	705.841	899.359	649.375	612.067	4231.71	1889.5	1160.64	1553.23	902.423	1066.06	-6.03131	-8.39776	-6.59078	-9.12798	-9.68436	-2.23959	-3.64601	-2.72446	-4.68928	-3.96949
Bra028091	AT2G18660.1	Symbols: PNP-A | plant natriuretic peptide A | chr2:8091032-8091644 REVERSE LENGTH=130	3945.17	535.83	717.207	1077.81	514.469	407.909	8893.86	1504.8	1016.17	725.321	1697.74	1619.48	-7.36273	-5.50074	-3.66036	-7.66843	-9.67169	-5.91033	-8.75233	-12.262	-5.23865	-5.4918
Bra000311	AT2G43590.1	Symbols: | Chitinase family protein | chr2:18081592-18082749 REVERSE LENGTH=264	8550.82	870.451	1670.73	1077.19	863.006	886.941	2020.26	933.574	380.535	692.725	377.34	381.001	-9.82344	-5.11801	-7.93808	-9.90818	-9.6408	-2.16401	-5.309	-2.9164	-5.35395	-5.30251
Bra021404	AT3G62690.1	Symbols: ATL5 | AtL5 | chr3:23185829-23186602 REVERSE LENGTH=257	1419.06	109.826	108.973	138.495	127.049	148.767	635.886	72.7576	68.9118	212.275	250.449	125.117	-12.921	-13.0221	-10.2463	-11.1694	-9.53881	-8.73979	-9.22753	-2.99558	-2.53898	-5.08233
Bra013123	AT2G14580.1	Symbols: ATPRB1, PRB1 | basic pathogenesis-related protein 1 | chr2:6225703-6226188 REVERSE LENGTH=161	15687.3	1710.96	3936.78	2537.02	1369.01	1647.42	6027.73	1161.31	546.388	781.358	469.635	743.49	-9.16871	-3.9848	-6.18336	-11.4589	-9.52234	-5.19046	-11.032	-7.71443	-12.8349	-8.10735
Bra024284	AT5G64310.1	Symbols: AGP1, ATAGP1 | arabinogalactan protein 1 | chr5:25722018-25722413 FORWARD LENGTH=131	26233.7	4092.32	3218.13	3512.06	2222.48	2757.74	12845.3	4549.21	4320.66	4568.38	4284.17	3152.07	-6.41047	-8.15185	-7.4696	-11.8038	-9.51275	-2.82363	-2.97299	-2.81178	-2.99832	-4.0752
Bra009680	AT5G23400.1	Symbols: | Leucine-rich repeat (LRR) family protein | chr5:7880603-7882372 FORWARD LENGTH=589	2633.28	315.191	400.72	314.764	236.433	276.943	1593.53	225.998	225.627	198.728	195.48	167.083	-8.35455	-6.57137	-8.36589	-11.1375	-9.50838	-7.05108	-7.06267	-8.01865	-8.15188	-9.53736
Bra038442	AT4G14130.1	Symbols: XTR7, XTH15 | xyloglucan endotransglucosylase/hydrolase 15 | chr4:8137161-8138196 REVERSE LENGTH=289	2610.48	417.877	304.052	383.372	569.815	275.648	7558.25	1920.48	1486.03	1297.98	827.368	440.69	-6.24701	-8.58564	-6.80926	-4.58128	-9.47034	-3.9356	-5.0862	-5.82309	-9.13529	-17.1509
Bra025636	AT5G39890.1	Symbols: | Protein of unknown function (DUF1637) | chr5:15974543-15976013 FORWARD LENGTH=276	2791.19	555.479	489.435	471.554	580.606	295.59	2559.01	858.273	1040.21	714.081	792.491	795.451	-5.02483	-5.70288	-5.91913	-4.80737	-9.44278	-2.98158	-2.46009	-3.58364	-3.22907	-3.21706
Bra038810	AT4G20270.1	Symbols: BAM3 | Leucine-rich receptor-like protein kinase family protein | chr4:10949822-10952924 FORWARD LENGTH=992	1573.95	244.294	233.98	321.591	258.614	168.059	1418.2	239.727	229.743	246.037	128.158	169.017	-6.44285	-6.72686	-4.89426	-6.0861	-9.36546	-5.9159	-6.17298	-5.76417	-11.066	-8.39087
Bra027016	AT1G62790.1	Symbols: | Bifunctional inhibitor/lipid-transfer protein/seed storage 2S albumin superfamily protein | chr1:23252369-23253481 FORWARD LENGTH=150	5979.98	1047.76	1009.1	954.386	705.424	647.089	4864.91	1250.21	881.453	1254.7	903.34	1021.21	-5.70739	-5.92605	-6.26579	-8.47714	-9.24136	-3.89127	-5.51919	-3.87735	-5.38547	-4.76387
Bra018433	AT1G10550.1	Symbols: XTH33, XET | xyloglucan:xyloglucosyl transferase 33 | chr1:3479257-3480957 REVERSE LENGTH=310	11510.6	2366.05	1800.21	1728.16	1597.97	1246.51	10877.3	3500.53	2603.76	2901.2	1779	2026.85	-4.8649	-6.39403	-6.66061	-7.20326	-9.23426	-3.10733	-4.17754	-3.74924	-6.11428	-5.3666
Bra014500	AT3G60290.1	Symbols: | 2-oxoglutarate (2OG) and Fe(II)-dependent oxygenase superfamily protein | chr3:22282662-22284414 FORWARD LENGTH=357	6944.5	1018.91	1285.54	989.61	1053.76	752.109	818.845	397.637	337.043	311.099	267.259	227.626	-6.81562	-5.40201	-7.01741	-6.59021	-9.23337	-2.05928	-2.4295	-2.6321	-3.06386	-3.59733
Bra028893	AT5G01210.1	Symbols: | HXXXD-type acyl-transferase family protein | chr5:84554-85981 FORWARD LENGTH=475	2033.92	571.581	535.748	460.544	418.983	221.043	1729.77	817.665	607.128	540.74	510.699	396.369	-3.55841	-3.79641	-4.41634	-4.85442	-9.20147	-2.1155	-2.8491	-3.19889	-3.38706	-4.36404
Bra005681	AT5G01540.1	Symbols: LECRKA4.1 | lectin receptor kinase a4.1 | chr5:211285-213333 REVERSE LENGTH=682	942.923	256.094	198.857	204.08	192.62	104.113	709.709	304.503	225.627	288.474	237.129	213.589	-3.68194	-4.74171	-4.62036	-4.89525	-9.05673	-2.33071	-3.1455	-2.46022	-2.99292	-3.32278
Bra026701	AT1G16850.1	Symbols: | unknown protein; FUNCTIONS IN: molecular_function unknown; INVOLVED IN: response to salt stress; LOCATED IN: endomembrane system; EXPRESSED IN: leaf apex, leaf whorl, male gametophyte, flower, leaf; EXPRESSED DURING: LP.06 six leaves visible, LP.04 four leaves visible, LP.10 ten leaves visible, petal differentiation and expansion stage, LP.08 eight leaves visible; BEST Arabidopsis thal…	6450.61	1326.88	1192.42	1420.23	741.164	716.989	6565.74	2576.06	1465.47	1869.62	1155.41	1471.6	-4.86149	-5.40968	-4.54195	-8.70335	-8.9968	-2.54875	-4.4803	-3.5118	-5.68261	-4.46163
Bra018953	AT1G52200.1	Symbols: | PLAC8 family protein | chr1:19442271-19443407 REVERSE LENGTH=190	10026.3	1621.6	2114.21	1722.05	2272.83	1121.21	12107	5016.49	4247.08	4773.63	3772.9	3285.83	-6.18297	-4.74234	-5.8223	-4.41137	-8.94239	-2.41344	-2.85066	-2.53623	-3.20894	-3.68461
Bra026570	AT2G02990.1	Symbols: RNS1, ATRNS1 | ribonuclease 1 | chr2:873714-874667 FORWARD LENGTH=230	9836.43	1284.6	1803.34	1540.12	1514.62	1101.16	10535.8	1665.85	1486.39	1279.95	1225.76	800.448	-7.65719	-5.45456	-6.38679	-6.49432	-8.93279	-6.32458	-7.08818	-8.23142	-8.59532	-13.1624
Bra000593	AT5G49700.1	Symbols: | Predicted AT-hook DNA-binding family protein | chr5:20192599-20193429 FORWARD LENGTH=276	15590	1941.57	2517.95	2015.3	2431.44	1749.32	11928.1	3391.89	2250.83	2370.9	1932.89	1663.41	-8.02958	-6.19154	-7.73582	-6.41184	-8.91203	-3.51665	-5.29942	-5.03104	-6.17112	-7.17087
Bra037625	AT3G45060.1	Symbols: ATNRT2.6, NRT2.6 | high affinity nitrate transporter 2.6 | chr3:16477671-16479386 REVERSE LENGTH=542	815.164	164.96	224.776	159.466	169.751	91.6207	1266.24	366.053	173.348	243.297	111.421	189.183	-4.94159	-3.62656	-5.11184	-4.80212	-8.89716	-3.45917	-7.30461	-5.2045	-11.3645	-6.6932
Bra029456	AT4G12480.1	Symbols: pEARLI 1 | Bifunctional inhibitor/lipid-transfer protein/seed storage 2S albumin superfamily protein | chr4:7406371-7406877 REVERSE LENGTH=168	2477.16	310.999	467.803	322.811	367.49	279.868	4258.04	689.563	553.109	765.869	601.644	545.969	-7.96517	-5.29531	-7.67372	-6.74075	-8.85117	-6.17498	-7.69837	-5.55975	-7.07734	-7.79905
Bra029079	AT5G53290.1	Symbols: CRF3 | cytokinin response factor 3 | chr5:21617961-21619025 REVERSE LENGTH=354	11028.6	1007.64	934.586	1127.57	883.536	1250.94	5479.03	965.229	374.376	394.096	216.488	197.434	-10.945	-11.8005	-9.78086	-12.4823	-8.81625	-5.6764	-14.6351	-13.9028	-25.3087	-27.7512
Bra027444	AT5G42680.1	Symbols: | Protein of unknown function, DUF617 | chr5:17114640-17115356 FORWARD LENGTH=238	3034.63	495.96	379.794	445.924	554.607	349.779	735.456	123.784	89.4558	96.8435	45.823	120.925	-6.1187	-7.9902	-6.80526	-5.47168	-8.67585	-5.94145	-8.22145	-7.59427	-16.0499	-6.08192
Bra021856	AT2G33480.1	Symbols: ANAC041, NAC041 | NAC domain containing protein 41 | chr2:14181275-14182247 FORWARD LENGTH=268	1082.24	120.543	201.493	162.851	342.668	124.885	705.323	152.115	103.948	192.351	162.01	91.0461	-8.97804	-5.3711	-6.64558	-3.15828	-8.66589	-4.63677	-6.78534	-3.66685	-4.35358	-7.74688
Bra010194	AT4G10270.1	Symbols: | Wound-responsive family protein | chr4:6374805-6375077 FORWARD LENGTH=90	3080.16	363.738	641.883	452.97	443.202	355.775	4712.23	726.446	652.126	641.099	505.858	552.048	-8.46807	-4.79863	-6.79992	-6.94979	-8.65761	-6.48669	-7.22595	-7.35024	-9.31532	-8.53591
Bra009238	AT5G06860.1	Symbols: PGIP1, ATPGIP1 | polygalacturonase inhibiting protein 1 | chr5:2132373-2133434 FORWARD LENGTH=330	3972.37	874.154	711.883	767.93	667.914	462.34	4603.23	861.985	624.359	522.479	305.079	450.886	-4.54425	-5.58009	-5.17283	-5.94743	-8.59188	-5.34027	-7.37273	-8.81036	-15.0886	-10.2093
Bra005071	AT2G38940.1	Symbols: ATPT2, PHT1;4 | phosphate transporter 1;4 | chr2:16258500-16260104 FORWARD LENGTH=534	2480.41	248.442	290.428	319.122	351.454	290.748	7587.86	1446.13	1456.1	1414.01	1145.5	1313.65	-9.98386	-8.54053	-7.77261	-7.05757	-8.53113	-5.24701	-5.21108	-5.3662	-6.62406	-5.77617
Bra021621	AT2G30230.1	Symbols: | unknown protein; FUNCTIONS IN: molecular_function unknown; INVOLVED IN: biological_process unknown; LOCATED IN: endomembrane system; BEST Arabidopsis thaliana protein match is: unknown protein (TAIR:AT1G06980.1); Has 167 Blast hits to 167 proteins in 14 species: Archae - 0; Bacteria - 0; Metazoa - 0; Fungi - 0; Plants - 167; Viruses - 0; Other Eukaryotes - 0 (source: NCBI BLink). | chr…	645.117	198.424	104.693	109.796	102.039	75.6582	565.802	211.124	170.682	241.157	183.766	217.044	-3.2512	-6.16199	-5.8756	-6.32226	-8.52673	-2.67995	-3.31495	-2.3462	-3.07893	-2.60685
Bra004771	AT2G43570.1	Symbols: CHI | chitinase, putative | chr2:18076389-18077435 REVERSE LENGTH=277	2913.64	974.667	1213.96	724.514	676.813	342.677	3735.58	891.525	735.061	1046.19	461.213	1041.96	-2.98937	-2.40011	-4.02151	-4.30494	-8.50258	-4.1901	-5.082	-3.57065	-8.09947	-3.58515
Bra025547	AT5G40780.2	Symbols: | lysine histidine transporter 1 | chr5:16323823-16327082 FORWARD LENGTH=445	7786.59	1000.62	1177.21	1121.09	1259.37	925.151	7252.15	1053.69	1218.09	1369.2	1072.1	1534.84	-7.78177	-6.61444	-6.94555	-6.18292	-8.41656	-6.88262	-5.95371	-5.29663	-6.76443	-4.72502
Bra034561	AT4G33420.1	Symbols: | Peroxidase superfamily protein | chr4:16084856-16086105 FORWARD LENGTH=325	12009.9	5345.77	3136.24	2673.6	2286.88	1435	10868.6	3771.24	2396.81	2776.52	1605.34	1369.24	-2.24662	-3.82939	-4.49203	-5.25165	-8.36927	-2.88197	-4.53461	-3.91447	-6.77028	-7.93769
Bra036442	AT3G03690.1	Symbols: UNE7 | Core-2/I-branching beta-1,6-N-acetylglucosaminyltransferase family protein | chr3:911494-913643 REVERSE LENGTH=378	524.297	144.177	129.296	189.719	89.241	62.6505	832.414	276.835	253.998	222.402	149.742	144.509	-3.63648	-4.05501	-2.76355	-5.87507	-8.3686	-3.0069	-3.27725	-3.74284	-5.55899	-5.76029
Bra007886	AT1G69870.1	Symbols: NRT1.7 | nitrate transporter 1.7 | chr1:26316208-26320097 FORWARD LENGTH=620	2287.2	360.229	409.609	372.2	232.738	273.388	3707.42	1044	560.238	604.646	282.98	329.746	-6.34929	-5.58386	-6.14508	-9.82736	-8.36613	-3.55117	-6.61758	-6.13155	-13.1013	-11.2433
Bra000486	AT2G28590.1	Symbols: | Protein kinase superfamily protein | chr2:12249835-12251490 FORWARD LENGTH=424	1403.45	252.751	289.318	236.852	201.959	169.438	1572.1	332.724	270.012	371.358	101.869	104.827	-5.5527	-4.85089	-5.92543	-6.94918	-8.28297	-4.72494	-5.82233	-4.23338	-15.4326	-14.9971
Bra036788	AT3G51600.1	Symbols: LTP5 | lipid transfer protein 5 | chr3:19138661-19139124 REVERSE LENGTH=118	5956.49	1060.22	1124.4	982.822	746.425	725.784	7357.31	2303.38	1448.95	1830.83	1094.96	1351.02	-5.61816	-5.29748	-6.0606	-7.98002	-8.20697	-3.19414	-5.07768	-4.01857	-6.71925	-5.44574
Bra014854	AT3G53960.1	Symbols: | Major facilitator superfamily protein | chr3:19978306-19980886 REVERSE LENGTH=602	3871.81	1182.67	834.473	732.481	761.469	473.063	1325.78	533.86	476.553	626.201	415.507	372.979	-3.27379	-4.63983	-5.28588	-5.08466	-8.18455	-2.48339	-2.78202	-2.11718	-3.19075	-3.55457
Bra036871	AT4G13810.1	Symbols: AtRLP47, RLP47 | receptor like protein 47 | chr4:8005062-8007287 REVERSE LENGTH=741	1937.4	416.002	407.369	435.136	287.015	237.764	1278.83	391.053	303.979	353.079	384.02	254.765	-4.65719	-4.75588	-4.4524	-6.75017	-8.14842	-3.27022	-4.20697	-3.62194	-3.33011	-5.01965
Bra023790	AT3G22910.1	Symbols: | ATPase E1-E2 type family protein / haloacid dehalogenase-like hydrolase family protein | chr3:8116335-8119388 REVERSE LENGTH=1017	3304.47	774.376	734.418	657.229	612.823	407.49	2124.08	1029.39	844.556	834.682	577.156	446.33	-4.26727	-4.49944	-5.02788	-5.39221	-8.10933	-2.06344	-2.51503	-2.54478	-3.68025	-4.75899
Bra027257	AT3G16530.1	Symbols: | Legume lectin family protein | chr3:5624586-5625416 REVERSE LENGTH=276	2366.77	339.414	389.387	393.995	251.516	293.278	943.563	217.353	173.434	214.655	224.241	154.2	-6.97311	-6.07819	-6.00711	-9.41002	-8.07006	-4.34115	-5.44047	-4.39572	-4.20781	-6.11909
Bra029302	AT5G61890.1	Symbols: | Integrase-type DNA-binding superfamily protein | chr5:24852639-24853744 REVERSE LENGTH=248	4049.35	336.313	375.35	419.651	438.294	510.121	5171.87	804.397	340.836	342.353	231.123	217.323	-12.0404	-10.7882	-9.64933	-9.23889	-7.93802	-6.4295	-15.1741	-15.1068	-22.3771	-23.7981
Bra024893	AT2G01275.1	Symbols: | RING/FYVE/PHD zinc finger superfamily protein | chr2:142610-143809 REVERSE LENGTH=259	1795.39	390.288	412.549	323.997	412.168	226.764	934.434	383.498	317.259	306.063	158.915	268.128	-4.60017	-4.35194	-5.54138	-4.35597	-7.91744	-2.43661	-2.94533	-3.05308	-5.88009	-3.48503
Bra000421	AT2G46370.4	Symbols: JAR1 | Auxin-responsive GH3 family protein | chr2:19034233-19036369 FORWARD LENGTH=586	4192.06	858.543	994.99	913.017	1149.33	529.553	6075.73	2430.32	1948.77	1139.99	890.904	601.479	-4.88276	-4.21317	-4.59144	-3.64739	-7.91622	-2.49997	-3.11773	-5.32963	-6.81974	-10.1013
Bra035271	AT5G49690.1	Symbols: | UDP-Glycosyltransferase superfamily protein | chr5:20189968-20191350 REVERSE LENGTH=460	2346.67	326.581	152.813	185.646	356.765	298.313	2366.6	267.376	195.774	214.387	297.387	181.219	-7.18557	-15.3565	-12.6406	-6.57764	-7.86647	-8.85121	-12.0884	-11.0389	-7.95798	-13.0593
Bra008469	AT1G80510.1	Symbols: | Transmembrane amino acid transporter family protein | chr1:30273100-30274569 FORWARD LENGTH=489	4238.17	747.154	580.395	1025.45	726.972	540.21	4168.5	1652.14	943.314	1555.59	1036.88	997.681	-5.67242	-7.30222	-4.13299	-5.82989	-7.84541	-2.52309	-4.419	-2.67969	-4.02023	-4.17819
Bra028485	AT5G41080.1	Symbols: | PLC-like phosphodiesterases superfamily protein | chr5:16441858-16443835 FORWARD LENGTH=374	669.068	326.221	309.116	212.23	138.446	85.4359	557.813	251.051	155.328	103.967	175.33	55.2345	-2.05097	-2.16446	-3.15256	-4.8327	-7.83123	-2.22191	-3.59119	-5.36529	-3.1815	-10.099
Bra004092	AT1G67340.1	Symbols: | HCP-like superfamily protein with MYND-type zinc finger | chr1:25230323-25231622 FORWARD LENGTH=379	3785.45	765.287	705.025	691.369	688.395	493.175	3195.16	932.148	628.669	581.941	471.544	601.128	-4.94644	-5.36924	-5.4753	-5.49895	-7.67567	-3.42774	-5.08242	-5.49052	-6.77595	-5.31527
Bra000310	AT2G43570.1	Symbols: CHI | chitinase, putative | chr2:18076389-18077435 REVERSE LENGTH=277	2425.39	530.357	452.729	499.368	596.765	317.901	3068.85	962.189	605.672	980.456	727.079	1285.59	-4.57313	-5.35727	-4.85692	-4.06423	-7.62939	-3.18945	-5.06685	-3.13002	-4.22079	-2.38711
Bra026461	AT4G26150.1	Symbols: CGA1, GATA22, GNL | cytokinin-responsive gata factor 1 | chr4:13253210-13254659 FORWARD LENGTH=352	1685.69	343.106	339.979	329.023	302.387	222.145	1618.42	395.392	388.841	324.119	260.413	264.621	-4.91303	-4.95822	-5.12332	-5.57461	-7.58824	-4.0932	-4.16216	-4.99329	-6.21482	-6.11599
Bra008705	AT5G15310.1	Symbols: ATMYB16, ATMIXTA, MYB16 | myb domain protein 16 | chr5:4974894-4976106 FORWARD LENGTH=326	5373.32	799.203	793.783	797.703	782.471	709.75	7087.73	1266.57	1060.35	797.914	612.437	1094.04	-6.72335	-6.76926	-6.73599	-6.86712	-7.57072	-5.596	-6.68433	-8.88282	-11.573	-6.47849
Bra036875	AT4G13810.1	Symbols: AtRLP47, RLP47 | receptor like protein 47 | chr4:8005062-8007287 REVERSE LENGTH=741	1525.17	277.099	338.609	285.997	234.928	201.549	1161.37	427.33	318.74	355.646	210.764	331.696	-5.50406	-4.50422	-5.33282	-6.49207	-7.56724	-2.71774	-3.64363	-3.26552	-5.51029	-3.50131
Bra026062	AT1G16370.1	Symbols: ATOCT6, OCT6 | organic cation/carnitine transporter 6 | chr1:5596762-5598327 FORWARD LENGTH=521	1242.65	217.19	166.263	235.765	169.631	166.288	949.638	160.057	142.948	165.35	93.988	215.035	-5.72149	-7.474	-5.27071	-7.32561	-7.47288	-5.93312	-6.64324	-5.7432	-10.1038	-4.4162
Bra011969	AT1G08080.1	Symbols: ATACA7, ACA7 | alpha carbonic anhydrase 7 | chr1:2517022-2518546 REVERSE LENGTH=275	1693.24	133.629	134.204	185.103	144.291	226.645	1293.74	221.562	58.9373	34.0514	35.0899	57.385	-12.6712	-12.6169	-9.14756	-11.7349	-7.47089	-5.83918	-21.9511	-37.9937	-36.8693	-22.5449
Bra012890	AT3G50760.1	Symbols: GATL2 | galacturonosyltransferase-like 2 | chr3:18868074-18869099 FORWARD LENGTH=341	4029.88	407.57	398.034	565.359	444.876	539.567	4666.2	1017.11	449.331	613.701	314.703	399.342	-9.88758	-10.1245	-7.128	-9.05843	-7.46873	-4.5877	-10.3848	-7.60338	-14.8273	-11.6847
Bra032433	AT1G06160.1	Symbols: ORA59 | octadecanoid-responsive Arabidopsis AP2/ERF 59 | chr1:1883046-1883780 FORWARD LENGTH=244	6458.18	1244.65	1675.06	1101.39	2743.9	868.942	5737.8	709.841	1514.27	1123.46	1022.54	990.35	-5.18875	-3.85549	-5.86366	-2.35365	-7.43223	-8.08322	-3.78915	-5.10726	-5.61132	-5.79371
Bra012631	AT5G46680.1	Symbols: | Pentatricopeptide repeat (PPR-like) superfamily protein | chr5:18941118-18942524 FORWARD LENGTH=468	1153.71	154.873	171.84	215.186	217.906	155.414	1565.17	301.807	277.349	502.27	226.787	270.105	-7.44939	-6.71386	-5.36145	-5.29453	-7.42346	-5.186	-5.64332	-3.11619	-6.9015	-5.79467
Bra013532	AT4G21510.1	Symbols: | F-box family protein | chr4:11446193-11447025 REVERSE LENGTH=225	3806.03	616.866	526.386	525.914	538.452	515.331	2660.03	834.415	493.192	452.674	373.869	491.275	-6.16995	-7.23049	-7.23698	-7.06847	-7.3856	-3.1879	-5.3935	-5.87626	-7.11487	-5.41454
Bra028881	AT5G02190.1	Symbols: EMB24, ATASP38, PCS1 | Eukaryotic aspartyl protease family protein | chr5:435322-436683 FORWARD LENGTH=453	1321.22	96.2773	114.452	221.191	174.227	179.1	1295.73	111.353	190.647	172.773	139.279	146.677	-13.7231	-11.5439	-5.97321	-7.58333	-7.377	-11.6362	-6.79649	-7.49961	-9.30313	-8.8339
Bra035917	NA	NA	4562.27	1169.5	896.451	846.258	658.174	618.774	1414.9	536.145	493.155	625.959	421.517	504.404	-3.90104	-5.08926	-5.39111	-6.93171	-7.37308	-2.63902	-2.86908	-2.26037	-3.35669	-2.80509
Bra033349	AT1G02816.1	Symbols: | Protein of unknown function, DUF538 | chr1:621637-622137 FORWARD LENGTH=166	2622.09	634.91	529.804	559.493	433.985	356.219	1664.8	710.701	364.906	532.245	419.926	325.237	-4.12986	-4.94917	-4.68655	-6.04189	-7.36089	-2.34248	-4.56227	-3.12788	-3.96451	-5.11873
Bra007425	AT3G59010.1	Symbols: PME61 | pectin methylesterase 61 | chr3:21803015-21805098 REVERSE LENGTH=529	3183.64	561.235	547.386	664.988	729.339	434.319	3947.09	1098.17	956.664	1034.89	531.082	506.204	-5.67256	-5.81608	-4.78751	-4.3651	-7.33019	-3.59424	-4.12589	-3.81402	-7.43217	-7.79743
Bra037794	AT5G64750.1	Symbols: ABR1 | Integrase-type DNA-binding superfamily protein | chr5:25891679-25893656 FORWARD LENGTH=391	5077.86	557.987	563.604	575.277	394.189	693.899	5296.19	1110.82	537.999	503.09	425.191	258.784	-9.10032	-9.00962	-8.82681	-12.8818	-7.31787	-4.76782	-9.84424	-10.5273	-12.456	-20.4657
Bra004586	AT2G40750.1	Symbols: WRKY54, ATWRKY54 | WRKY DNA-binding protein 54 | chr2:17000636-17002354 REVERSE LENGTH=346	4926.83	578.024	721.58	660.818	924.9	675.097	2347.51	662.099	577.904	660.72	380.135	207.137	-8.52357	-6.82784	-7.45565	-5.32688	-7.29796	-3.54556	-4.06211	-3.55296	-6.17546	-11.3331
Bra021628	AT2G30360.1	Symbols: CIPK11, PKS5, SIP4, SNRK3.22 | SOS3-interacting protein 4 | chr2:12937265-12938572 REVERSE LENGTH=435	9525.83	1168.34	1635.28	1426.42	1601.94	1312.32	7669.95	2344.42	2073.58	2200.51	1288.44	1321.1	-8.1533	-5.8252	-6.67814	-5.94643	-7.25877	-3.27158	-3.69889	-3.48553	-5.9529	-5.80573
Bra016074	AT1G72280.1	Symbols: AERO1, ERO1 | endoplasmic reticulum oxidoreductins 1 | chr1:27212039-27214506 REVERSE LENGTH=469	3549.56	931.329	1021.72	791.574	720.995	489.183	2246.62	1001.9	812.174	875.182	499.968	569.487	-3.81128	-3.4741	-4.48418	-4.92314	-7.2561	-2.24236	-2.76618	-2.56703	-4.49353	-3.94499
Bra008028	AT1G72310.1	Symbols: ATL3 | RING/U-box superfamily protein | chr1:27226405-27227379 FORWARD LENGTH=324	851.584	211.311	171.664	194.941	151.182	117.503	1074.22	245.241	162.2	158.081	101.689	151.849	-4.03	-4.96076	-4.36842	-5.63284	-7.24734	-4.38026	-6.62281	-6.79538	-10.5638	-7.07426
Bra035189	AT1G80310.1	Symbols: | sulfate transmembrane transporters | chr1:30194951-30196345 FORWARD LENGTH=464	3675.19	790.076	650.58	660.216	643.137	510.914	2635.22	966.915	848.704	885.769	798.691	785.299	-4.65169	-5.6491	-5.56665	-5.71447	-7.19336	-2.72539	-3.10499	-2.97506	-3.29942	-3.35569
Bra023849	AT3G22160.1	Symbols: | VQ motif-containing protein | chr3:7818148-7818726 REVERSE LENGTH=192	4750.19	563.189	985.33	758.41	824.914	660.849	3038.16	1160.5	1004.27	915.597	738.318	686.021	-8.43445	-4.82091	-6.26335	-5.75841	-7.18801	-2.61798	-3.02524	-3.31823	-4.11497	-4.42867
Bra000340	AT2G44080.1	Symbols: ARL | ARGOS-like | chr2:18237726-18238133 FORWARD LENGTH=135	19043.4	3409.02	3777.1	3646.62	4395.39	2651.76	13868.2	4043.74	3221.17	3502.5	1972.95	1667.55	-5.58618	-5.0418	-5.22221	-4.33258	-7.18142	-3.42955	-4.30533	-3.95951	-7.02917	-8.31651
Bra041079	AT1G52140.1	Symbols: | unknown protein; BEST Arabidopsis thaliana protein match is: unknown protein (TAIR:AT3G16330.1); Has 114 Blast hits to 114 proteins in 15 species: Archae - 0; Bacteria - 0; Metazoa - 0; Fungi - 0; Plants - 114; Viruses - 0; Other Eukaryotes - 0 (source: NCBI BLink). | chr1:19407559-19408185 REVERSE LENGTH=208	1559.86	292.998	341.339	267.858	254.338	217.422	1620.24	405.506	292.994	330.506	517.4	248.279	-5.32379	-4.56983	-5.82346	-6.13302	-7.17434	-3.9956	-5.52994	-4.9023	-3.1315	-6.52588
Bra038294	NA	NA	1735.9	308.907	275.422	321.127	197.251	242.045	2096.49	352.428	203.018	236.184	157.35	165.696	-5.61949	-6.30269	-5.40565	-8.80046	-7.17181	-5.9487	-10.3266	-8.87651	-13.3237	-12.6526
Bra004768	AT2G43510.1	Symbols: ATTI1, TI1 | trypsin inhibitor protein 1 | chr2:18067211-18067620 FORWARD LENGTH=89	3653.12	467.668	536.784	453.674	500.652	511.791	5029.79	1002.31	663.29	825.599	501.081	696.516	-7.81135	-6.80557	-8.0523	-7.29673	-7.13791	-5.0182	-7.58309	-6.09229	-10.0379	-7.22136
Bra001516	AT3G13650.1	Symbols: | Disease resistance-responsive (dirigent-like protein) family protein | chr3:4463056-4463616 FORWARD LENGTH=186	1394.68	348.439	308.304	302.041	221.505	195.667	1608.52	602.497	285.93	264.511	184.463	184.035	-4.00265	-4.52372	-4.61752	-6.29638	-7.12782	-2.66976	-5.62557	-6.08111	-8.72001	-8.74029
Bra031919	AT5G64410.1	Symbols: ATOPT4, OPT4 | oligopeptide transporter 4 | chr5:25750921-25754974 REVERSE LENGTH=729	1870.4	741.541	583.095	517.877	396.598	263.628	4836.1	1694.12	1104.89	1501.83	981.034	792.392	-2.52232	-3.20771	-3.61167	-4.71611	-7.09485	-2.85464	-4.377	-3.22014	-4.92959	-6.10317
Bra002118	AT5G17980.1	Symbols: | C2 calcium/lipid-binding plant phosphoribosyltransferase family protein | chr5:5953596-5956745 FORWARD LENGTH=1049	6498.06	1887.76	1698.73	1402.11	1271.3	917.949	5794.14	2542.05	2427.85	2388.31	1566.56	1581.47	-3.44221	-3.82525	-4.63449	-5.11135	-7.07889	-2.27932	-2.38653	-2.42604	-3.69864	-3.66377
Bra018557	AT4G02370.1	Symbols: | Protein of unknown function, DUF538 | chr4:1042458-1042961 FORWARD LENGTH=167	1228.07	385.452	291.813	253.79	189.57	173.873	1674.42	623.516	430.823	506.665	368.682	463.025	-3.18605	-4.20841	-4.83892	-6.47819	-7.06303	-2.68545	-3.88656	-3.30479	-4.54164	-3.61626
Bra010503	AT4G36010.1	Symbols: | Pathogenesis-related thaumatin superfamily protein | chr4:17039472-17040976 REVERSE LENGTH=301	6956.03	971.943	664.349	855.858	1155.64	989.691	8496.28	1243.91	979.715	1233.03	853.222	854.664	-7.15683	-10.4704	-8.12755	-6.0192	-7.02849	-6.8303	-8.6722	-6.89057	-9.95788	-9.94108
Bra000124	AT2G39210.1	Symbols: | Major facilitator superfamily protein | chr2:16366287-16368231 REVERSE LENGTH=601	2191.56	862.154	471.17	408.246	411.518	312.65	2119.87	754.406	405.063	705.855	532.534	791.902	-2.54196	-4.65131	-5.36823	-5.32555	-7.00963	-2.80999	-5.23343	-3.00327	-3.98072	-2.67693
Bra017454	AT2G01410.1	Symbols: | NHL domain-containing protein | chr2:175209-176372 REVERSE LENGTH=387	1641.95	425.363	364.597	358.268	308.868	236.167	1798.05	655.693	395.314	604.557	444.832	467.02	-3.86011	-4.50347	-4.58302	-5.31602	-6.9525	-2.74221	-4.54841	-2.97416	-4.04209	-3.85005
Bra040095	AT4G16790.1	Symbols: | hydroxyproline-rich glycoprotein family protein | chr4:9451747-9453168 REVERSE LENGTH=473	1239.14	233.025	232.9	208.2	221.646	178.499	1425.42	353.704	317.742	304.591	320.938	323.642	-5.31763	-5.32048	-5.95168	-5.59063	-6.942	-4.02998	-4.48609	-4.67978	-4.44142	-4.40431
Bra035386	AT5G35730.1	Symbols: | EXS (ERD1/XPR1/SYG1) family protein | chr5:13893941-13896821 FORWARD LENGTH=457	1402.52	460.584	360.064	357.668	309.516	202.421	1741.39	863.742	581.765	675.483	464.589	530.747	-3.04509	-3.8952	-3.92129	-4.53133	-6.92873	-2.0161	-2.99329	-2.57799	-3.74824	-3.28102
Bra021668	AT2G30830.1	Symbols: | 2-oxoglutarate (2OG) and Fe(II)-dependent oxygenase superfamily protein | chr2:13132707-13134284 REVERSE LENGTH=358	3077.14	570.063	620.754	506.5	459.34	446.369	2359.9	1175.37	815.697	710.946	425.433	367.541	-5.39789	-4.9571	-6.0753	-6.69905	-6.89371	-2.00779	-2.89311	-3.31938	-5.54705	-6.42078
Bra012796	AT4G15240.1	Symbols: | Protein of unknown function (DUF604) | chr4:8703518-8705378 REVERSE LENGTH=488	1213.58	346.116	204.176	270.487	381.469	176.266	1308.44	522.94	443.754	514.852	356.331	436.221	-3.50628	-5.94379	-4.48665	-3.18133	-6.88494	-2.50208	-2.94857	-2.54139	-3.67198	-2.99949
Bra012256	AT1G20900.1	Symbols: ESC, ORE7, AHL27 | Predicted AT-hook DNA-binding family protein | chr1:7273024-7273959 FORWARD LENGTH=311	2697.18	858.629	964.062	720.651	797.829	392.44	1241.65	508.23	236.872	273.166	224.117	176.402	-3.14126	-2.79772	-3.7427	-3.38065	-6.87285	-2.44309	-5.24186	-4.5454	-5.54019	-7.03875
Bra010532	AT4G35480.1	Symbols: RHA3B | RING-H2 finger A3B | chr4:16852233-16852835 REVERSE LENGTH=200	1365.07	360.377	278.236	369.326	235.121	199.573	1030.95	238.902	274.38	332.427	303.668	326.893	-3.78789	-4.90616	-3.69611	-5.80582	-6.83995	-4.31537	-3.75738	-3.10128	-3.39499	-3.15378
Bra030417	AT1G51790.1	Symbols: | Leucine-rich repeat protein kinase family protein | chr1:19206858-19210574 REVERSE LENGTH=882	1466.88	267.422	474.608	292.868	337.719	215.547	1457.35	439.416	429.217	461.815	210.695	281.918	-5.48526	-3.09072	-5.00867	-4.34349	-6.80538	-3.31656	-3.39537	-3.1557	-6.91687	-5.16941
Bra013361	AT4G18910.1	Symbols: NIP1;2, NLM2, ATNLM2 | NOD26-like intrinsic protein 1;2 | chr4:10366211-10368179 FORWARD LENGTH=294	3094.91	498.525	361.713	512.658	436.183	458.943	2643.83	837.834	415.118	614.604	304.127	405.146	-6.20813	-8.55626	-6.03699	-7.09544	-6.74356	-3.15555	-6.36886	-4.30168	-8.69318	-6.52562
Bra004564	AT2G46150.1	Symbols: | Late embryogenesis abundant (LEA) hydroxyproline-rich glycoprotein family | chr2:18961424-18962089 FORWARD LENGTH=221	773.646	97.7436	85.8133	105.062	319.508	115.089	588.628	118.674	40.3686	107.365	100.661	162.275	-7.91506	-9.01546	-7.36371	-2.42137	-6.72215	-4.96004	-14.5813	-5.48249	-5.84763	-3.62735
Bra035019	AT1G78210.1	Symbols: | alpha/beta-Hydrolases superfamily protein | chr1:29422820-29424294 REVERSE LENGTH=314	6216.52	1026.78	1217.47	993.943	1194.02	925.889	7891.56	3485.13	3379.79	3288.66	2017.43	1614.9	-6.05438	-5.1061	-6.2544	-5.20638	-6.71411	-2.26435	-2.33493	-2.39963	-3.91169	-4.88672
Bra021687	AT2G31010.1	Symbols: | Protein kinase superfamily protein | chr2:13194939-13199642 FORWARD LENGTH=775	6549.59	1094.65	1600.92	1285.84	1849.52	977.813	8891.09	3860.83	4061.23	3445.36	2301.52	1877.02	-5.98327	-4.09114	-5.09363	-3.54124	-6.6982	-2.3029	-2.18926	-2.5806	-3.86314	-4.73681
Bra025141	AT2G03980.1	Symbols: | GDSL-like Lipase/Acylhydrolase superfamily protein | chr2:1260907-1262408 FORWARD LENGTH=367	1133.97	337.161	182.276	176.184	119.027	170.581	2530.78	1101.86	353.515	386.482	225.312	111.104	-3.36329	-6.22117	-6.43628	-9.527	-6.64769	-2.29683	-7.1589	-6.54825	-11.2323	-22.7785
Bra017174	NA	NA	5446.79	1237.21	899.359	894.998	776.141	820.735	5512.38	1406.82	773.274	1324.59	464.784	852.378	-4.40248	-6.0563	-6.08581	-7.01778	-6.63648	-3.91833	-7.12862	-4.16157	-11.8601	-6.46706
Bra025095	AT5G45080.1	Symbols: AtPP2-A6, PP2-A6 | phloem protein 2-A6 | chr5:18191575-18193207 REVERSE LENGTH=392	1586.83	211.447	178.585	217.237	221.717	240.294	501.863	215.081	112.784	97.3645	74.0117	140.776	-7.50462	-8.88557	-7.3046	-7.15701	-6.6037	-2.33337	-4.44977	-5.15448	-6.78086	-3.56498
Bra008731	AT5G14930.2	Symbols: SAG101 | senescence-associated gene 101 | chr5:4828754-4830769 FORWARD LENGTH=537	2092.97	401.997	362.025	402.932	383.725	317.953	2584.76	1250.39	814.061	750.239	619.867	541.507	-5.20643	-5.78129	-5.19435	-5.45435	-6.58264	-2.06716	-3.17514	-3.44525	-4.16986	-4.77327
Bra036704	AT2G19780.1	Symbols: | Leucine-rich repeat (LRR) family protein | chr2:8522831-8524039 REVERSE LENGTH=402	807.683	186.757	160.965	126.179	112.713	123.269	655.961	175.07	103.845	108.731	110.561	90.7549	-4.32478	-5.01776	-6.40109	-7.16584	-6.5522	-3.74685	-6.31673	-6.03288	-5.93302	-7.22783
Bra017058	AT2G39705.1	Symbols: RTFL8, DVL11 | ROTUNDIFOLIA like 8 | chr2:16557038-16557301 FORWARD LENGTH=87	1330.57	206.302	160.513	182.337	159.275	203.597	986.956	358.016	268.278	216.361	190.48	225.721	-6.44962	-8.28948	-7.29731	-8.35392	-6.53531	-2.75674	-3.67886	-4.56162	-5.18142	-4.37246
Bra029602	NA	NA	9392.01	1696.74	1461.07	1885.01	1316.77	1439.13	9397.54	3993.63	2529.47	2285.27	1670.33	2152.06	-5.53533	-6.42817	-4.98247	-7.13261	-6.52617	-2.35313	-3.71522	-4.11222	-5.62616	-4.36676
Bra039004	AT2G19570.1	Symbols: CDA1, AT-CDA1, DESZ | cytidine deaminase 1 | chr2:8470598-8471503 REVERSE LENGTH=301	2302.18	418.867	539.596	544.024	617.599	353.048	2263.11	1081.5	960.908	668.24	647.913	587.32	-5.49621	-4.26649	-4.23176	-3.72763	-6.52087	-2.09257	-2.35518	-3.38667	-3.49292	-3.85328
Bra034572	AT4G33560.1	Symbols: | Wound-responsive family protein | chr4:16135465-16135752 FORWARD LENGTH=95	1882.12	216.155	366.436	331.867	349.369	288.689	1569.14	284.235	396.506	502.751	595.867	438.802	-8.70727	-5.13629	-5.67131	-5.3872	-6.51954	-5.52057	-3.95742	-3.12111	-2.63337	-3.57596
Bra029769	AT3G09450.1	Symbols: | CONTAINS InterPro DOMAIN/s: Fusaric acid resistance protein, conserved region (InterPro:IPR006726); BEST Arabidopsis thaliana protein match is: unknown protein (TAIR:AT2G28780.1); Has 503 Blast hits to 494 proteins in 215 species: Archae - 0; Bacteria - 423; Metazoa - 0; Fungi - 0; Plants - 65; Viruses - 0; Other Eukaryotes - 15 (source: NCBI BLink). | chr3:2907548-2910091 FORWARD LENG…	1055.25	278.108	297.282	244.098	321.47	162.133	598.115	195.838	146.302	95.4865	124.419	69.4968	-3.79439	-3.54966	-4.32306	-3.28258	-6.50855	-3.05413	-4.08822	-6.26387	-4.80726	-8.60637
Bra038792	AT4G20970.1	Symbols: | basic helix-loop-helix (bHLH) DNA-binding superfamily protein | chr4:11215259-11216212 FORWARD LENGTH=190	2119.12	409.637	741.736	653.075	585.184	327.871	1752.06	761.367	602.369	612.105	312.241	523.849	-5.17317	-2.85697	-3.24483	-3.62129	-6.46327	-2.3012	-2.90862	-2.86235	-5.61124	-3.34459
Bra011128	AT4G29680.1	Symbols: | Alkaline-phosphatase-like family protein | chr4:14538067-14539557 REVERSE LENGTH=496	505.264	144.15	132.371	126.656	186.348	78.2188	570.706	158.074	170.288	186.997	127.211	99.8331	-3.50513	-3.81703	-3.98926	-2.7114	-6.45962	-3.61037	-3.35142	-3.05195	-4.48629	-5.7166
Bra022803	AT2G30490.1	Symbols: ATC4H, C4H, CYP73A5, REF3 | cinnamate-4-hydroxylase | chr2:12993861-12995683 REVERSE LENGTH=505	1931.68	562.848	566.164	597.137	509.505	299.405	2651.15	1062.08	887.599	1078.67	626.497	687.441	-3.43197	-3.41187	-3.2349	-3.79129	-6.45173	-2.49619	-2.98688	-2.4578	-4.2317	-3.85655
Bra018898	AT1G51170.1	Symbols: | Protein kinase superfamily protein | chr1:18953625-18954839 REVERSE LENGTH=404	1879.45	405.655	376.83	376.516	464.029	292.784	2121.07	720.164	537.13	578.442	375.6	572.193	-4.63312	-4.98753	-4.99169	-4.05029	-6.41924	-2.94526	-3.9489	-3.66687	-5.64715	-3.70691
Bra025281	AT4G27710.1	Symbols: CYP709B3 | cytochrome P450, family 709, subfamily B, polypeptide 3 | chr4:13828520-13830417 FORWARD LENGTH=518	1326.6	414.004	421.234	415.953	388.398	206.935	1666.11	622.146	537.136	591.362	370.051	376.279	-3.20432	-3.14932	-3.1893	-3.41557	-6.41071	-2.678	-3.10184	-2.81741	-4.50238	-4.42786
Bra033694	AT5G43760.1	Symbols: KCS20 | 3-ketoacyl-CoA synthase 20 | chr5:17585903-17588486 FORWARD LENGTH=529	5828.07	1405.67	917.083	1074.48	899.424	919.414	5827.25	1479.49	1156.76	1888.04	1109.87	1479.46	-4.14612	-6.35501	-5.42408	-6.47978	-6.3389	-3.93869	-5.03756	-3.0864	-5.25039	-3.93877
Bra016073	AT1G72290.1	Symbols: | Kunitz family trypsin and protease inhibitor protein | chr1:27215852-27216499 FORWARD LENGTH=215	6019.42	476.201	913.179	920.637	881.446	950.922	2125.15	108.574	159.423	207.248	82.312	145.475	-12.6405	-6.59172	-6.53832	-6.82903	-6.33009	-19.5733	-13.3303	-10.2541	-25.8182	-14.6084
Bra032822	AT1G27360.1	Symbols: SPL11 | squamosa promoter-like 11 | chr1:9502139-9503715 FORWARD LENGTH=393	8345.34	1781.89	1178.03	1644.85	1373.48	1329.02	5274.46	1289.63	1654.01	1489.41	1225.75	1058.09	-4.68342	-7.08415	-5.07362	-6.07605	-6.27932	-4.0899	-3.18889	-3.54131	-4.30305	-4.98489
Bra032173	AT2G23340.1	Symbols: DEAR3 | DREB and EAR motif protein 3 | chr2:9938186-9938716 FORWARD LENGTH=176	3476.34	665.979	863.979	671.684	651.145	555.384	3425.99	1062.4	759.097	845.688	699.831	630.978	-5.21989	-4.02364	-5.17556	-5.33881	-6.25934	-3.22476	-4.51324	-4.05113	-4.89545	-5.42965
Bra032222	NA	NA	3648.93	389.663	430.069	423.33	343.718	583.187	3093.78	791.907	506.894	440.961	418.852	627.637	-9.36432	-8.48452	-8.61959	-10.6161	-6.25688	-3.90675	-6.10341	-7.01599	-7.38633	-4.92925
Bra017509	AT5G47060.1	Symbols: | Protein of unknown function (DUF581) | chr5:19116843-19117639 FORWARD LENGTH=177	9840.31	1183.04	1044.05	1309.6	1731.16	1580.25	7788.72	1030.38	1496.18	1426.66	966.894	1214.57	-8.31782	-9.42513	-7.51398	-5.68423	-6.22706	-7.55908	-5.20574	-5.45941	-8.0554	-6.41274
Bra013292	AT4G18210.1	Symbols: ATPUP10, PUP10 | purine permease 10 | chr4:10076175-10077495 FORWARD LENGTH=390	1075.59	215.275	120.792	150.331	119.371	174.554	676.655	156.195	105.548	129.267	103.367	100.291	-4.99635	-8.90448	-7.15481	-9.01048	-6.16193	-4.33212	-6.41087	-5.23455	-6.54614	-6.74692
Bra039124	AT3G01360.1	Symbols: | Family of unknown function (DUF716) | chr3:137772-138731 REVERSE LENGTH=319	1881.21	460.303	472.502	402.386	411.674	306.958	2266.7	861.544	565.709	725.73	448.797	586.531	-4.08689	-3.98138	-4.67514	-4.56966	-6.12856	-2.63097	-4.00683	-3.12334	-5.05061	-3.86459
Bra028639	AT5G64080.1	Symbols: | Bifunctional inhibitor/lipid-transfer protein/seed storage 2S albumin superfamily protein | chr5:25645475-25646638 REVERSE LENGTH=182	12269.8	3662.28	2996.43	2080.9	1870.87	2029.59	12282.6	3564.86	2419.63	2540.77	1454.27	1470.47	-3.35032	-4.09481	-5.89639	-6.55834	-6.04546	-3.44546	-5.07623	-4.8342	-8.44589	-8.35284
Bra030103	AT1G28510.1	Symbols: | Optic atrophy 3 protein (OPA3) | chr1:10024036-10025939 FORWARD LENGTH=171	885.193	197.164	253.447	185.395	222.805	146.508	1065.56	435.403	285.156	320.729	501.721	441.527	-4.48963	-3.49262	-4.77463	-3.97295	-6.04194	-2.4473	-3.73676	-3.32231	-2.12381	-2.41335
Bra036316	AT4G01700.1	Symbols: | Chitinase family protein | chr4:732413-733487 REVERSE LENGTH=280	6777.21	1074.37	936.645	1197.06	927.053	1125.28	4323.08	873.601	533.006	740.238	533.711	760.303	-6.30808	-7.23562	-5.66155	-7.31049	-6.02269	-4.94857	-8.11075	-5.84012	-8.10004	-5.686
Bra019940	AT1G10370.1	Symbols: GST30, ATGSTU17, GST30B, ERD9 | Glutathione S-transferase family protein | chr1:3397274-3398273 REVERSE LENGTH=227	32279	6619.2	7286.36	5971.34	6615.66	5391.63	29282.4	14047.9	8849.94	9065.47	6517.98	4892.4	-4.87657	-4.43006	-5.40565	-4.87918	-5.98687	-2.08447	-3.30877	-3.2301	-4.49256	-5.98528
Bra017086	AT2G39200.1	Symbols: MLO12, ATMLO12 | Seven transmembrane MLO family protein | chr2:16356255-16359797 REVERSE LENGTH=576	3720.19	707.678	805.824	670.576	1005.4	621.897	3148.77	1017.65	820.685	660.053	583.774	445.342	-5.2569	-4.61663	-5.54775	-3.70021	-5.982	-3.09416	-3.83676	-4.77048	-5.39382	-7.07045
Bra000613	AT5G50200.1	Symbols: WR3, ATNRT3.1, NRT3.1 | nitrate transmembrane transporters | chr5:20436612-20437535 FORWARD LENGTH=210	2350.77	556.479	381.767	491.147	559.239	393.154	1739.4	467.667	365.944	424.561	401.506	595.959	-4.22436	-6.1576	-4.78629	-4.20352	-5.97926	-3.71931	-4.75319	-4.09694	-4.33219	-2.91866
Bra026860	AT1G14080.1	Symbols: FUT6, ATFUT6 | fucosyltransferase 6 | chr1:4822580-4824218 FORWARD LENGTH=519	2591.39	980.356	578.08	602.745	418.769	433.548	1767.09	365.831	268.718	391.755	342.751	344.41	-2.64332	-4.48275	-4.29931	-6.18811	-5.97717	-4.83035	-6.576	-4.5107	-5.15561	-5.13077
Bra032151	AT2G23690.1	Symbols: | unknown protein; FUNCTIONS IN: molecular_function unknown; INVOLVED IN: N-terminal protein myristoylation; LOCATED IN: cellular_component unknown; EXPRESSED IN: 7 plant structures; EXPRESSED DURING: petal differentiation and expansion stage; BEST Arabidopsis thaliana protein match is: unknown protein (TAIR:AT4G37240.1); Has 243 Blast hits to 243 proteins in 15 species: Archae - 0; Bact…	1282.88	269.657	577.36	464.916	343.907	214.83	1127.1	282.367	369.784	254.528	388.564	175.932	-4.75745	-2.22198	-2.75938	-3.73031	-5.97161	-3.99161	-3.048	-4.4282	-2.90068	-6.40645
Bra023719	AT3G23560.1	Symbols: ALF5 | MATE efflux family protein | chr3:8454361-8456588 REVERSE LENGTH=477	3509.36	587.924	675.716	503.96	654.371	592.812	2214.16	758.821	543.051	553.109	508.222	686.655	-5.96907	-5.19354	-6.96357	-5.36295	-5.91985	-2.91789	-4.07726	-4.00312	-4.35668	-3.22456
Bra021039	AT4G17660.1	Symbols: | Protein kinase superfamily protein | chr4:9831401-9833006 FORWARD LENGTH=388	1014.79	179.609	244.747	253.195	219.68	171.891	814.155	321.022	245.939	256.085	183.099	202.73	-5.65	-4.14628	-4.00794	-4.6194	-5.90368	-2.53613	-3.31039	-3.17924	-4.44653	-4.01596
Bra018599	AT1G08800.1	Symbols: | Protein of unknown function, DUF593 | chr1:2813578-2817078 REVERSE LENGTH=1113	6137.98	1666.83	1564.27	1565.23	1700.15	1050.58	1698.3	717.683	666.163	576.33	334.554	365.204	-3.68243	-3.92386	-3.92146	-3.61026	-5.84247	-2.36637	-2.54938	-2.94675	-5.07631	-4.65028
Bra034155	NA	NA	1628.72	716.607	367.74	497.395	273.544	281.34	1075.71	451.275	323.533	475.913	322.904	372.692	-2.27282	-4.429	-3.2745	-5.95414	-5.78915	-2.38371	-3.32488	-2.26031	-3.33136	-2.88632
Bra021721	AT2G31650.1	Symbols: ATX1, SDG27 | homologue of trithorax | chr2:13455448-13462181 REVERSE LENGTH=1062	1057.2	283.454	236.57	246.509	242.064	184.31	750.416	294.635	227.232	204.48	150.59	231.955	-3.72971	-4.46887	-4.28869	-4.36744	-5.73599	-2.54693	-3.30242	-3.66987	-4.98317	-3.23518
Bra010143	AT4G08290.1	Symbols: | nodulin MtN21 /EamA-like transporter family protein | chr4:5239088-5240861 FORWARD LENGTH=384	2143.35	1028.57	511.025	550.076	409.655	374.109	1605.79	576.822	422.385	454.367	346.986	281.738	-2.08382	-4.19422	-3.89646	-5.23209	-5.72921	-2.78386	-3.80172	-3.53413	-4.62782	-5.69959
Bra017638	AT3G57230.1	Symbols: AGL16 | AGAMOUS-like 16 | chr3:21177710-21180671 FORWARD LENGTH=240	1629.72	303.609	381.39	234.4	245.828	285.025	765.209	248.569	276.998	174.553	160.534	187.84	-5.36783	-4.27311	-6.95273	-6.62951	-5.71781	-3.07846	-2.76251	-4.38382	-4.76665	-4.07373
Bra026732	AT1G16150.1	Symbols: WAKL4 | wall associated kinase-like 4 | chr1:5532415-5534877 FORWARD LENGTH=779	3717.46	551.544	844.505	562.072	664.221	652.377	2439.97	1123.51	954.711	753.016	681.123	642.176	-6.7401	-4.40194	-6.61385	-5.59672	-5.69833	-2.17174	-2.55572	-3.24026	-3.58228	-3.79953
Bra018121	AT4G10270.1	Symbols: | Wound-responsive family protein | chr4:6374805-6375077 FORWARD LENGTH=90	694.709	86.4816	239.557	204.59	120.018	121.947	1581.06	111.438	158.257	181.109	182.204	114.378	-8.03303	-2.89997	-3.39562	-5.78837	-5.69681	-14.1878	-9.99046	-8.72988	-8.67742	-13.8231
Bra026890	AT1G13750.1	Symbols: | Purple acid phosphatases superfamily protein | chr1:4715490-4718091 REVERSE LENGTH=613	1090.41	179.172	274.789	229.119	209.96	191.473	1142.33	456.997	372.395	287.617	199.377	227.077	-6.08583	-3.96817	-4.75914	-5.19342	-5.69485	-2.49964	-3.06752	-3.97171	-5.7295	-5.03058
Bra017732	AT4G35840.1	Symbols: | RING/U-box superfamily protein | chr4:16981083-16982266 FORWARD LENGTH=236	5593.91	1310.17	1624.11	1361.68	1154.7	983.321	5336.33	1567.29	1192.45	973.491	1006.1	1131.6	-4.26961	-3.44429	-4.10809	-4.84447	-5.68879	-3.40481	-4.4751	-5.48164	-5.30398	-4.71574
Bra016276	AT1G26560.1	Symbols: BGLU40 | beta glucosidase 40 | chr1:9178513-9181726 FORWARD LENGTH=510	966.048	321.877	264.795	251.711	224.466	170.326	1142.37	537.499	350.892	359.599	247.723	285.072	-3.0013	-3.64829	-3.83793	-4.30376	-5.67176	-2.12534	-3.25562	-3.17679	-4.61148	-4.0073
Bra006280	AT5G15120.1	Symbols: | Protein of unknown function (DUF1637) | chr5:4898814-4900351 FORWARD LENGTH=293	8080.77	1543.64	1929.97	2053.52	2795.26	1425.38	7997.85	3029.1	3417.36	2705.59	1965.09	2868.46	-5.23488	-4.18699	-3.93508	-2.89088	-5.6692	-2.64034	-2.34036	-2.95605	-4.06997	-2.7882
Bra035844	AT5G63450.1	Symbols: CYP94B1 | cytochrome P450, family 94, subfamily B, polypeptide 1 | chr5:25408987-25410519 REVERSE LENGTH=510	6048.16	898.682	909.886	986.423	960.747	1077.7	7826.57	1313.78	839.635	796.82	592.3	481.562	-6.73003	-6.64716	-6.13141	-6.29527	-5.6121	-5.95729	-9.3214	-9.82226	-13.2139	-16.2525
Bra029278	AT5G62180.1	Symbols: AtCXE20, CXE20 | carboxyesterase 20 | chr5:24978866-24979849 REVERSE LENGTH=327	15005.6	2282.49	2558.23	2573.47	3220.92	2687.27	12084.1	4295.18	2454.46	2671.47	2353.6	3447.67	-6.57422	-5.86562	-5.83088	-4.65879	-5.58396	-2.81341	-4.92332	-4.52339	-5.1343	-3.505
Bra026448	NA	NA	2240.59	455.812	490.812	413.655	771.657	402.267	2048.69	1019.35	514.4	663.635	343.119	391.801	-4.9156	-4.56507	-5.41657	-2.90361	-5.56991	-2.0098	-3.98268	-3.08707	-5.97079	-5.2289
Bra001725	AT3G18830.1	Symbols: ATPLT5, PMT5, ATPMT5 | polyol/monosaccharide transporter 5 | chr3:6489000-6491209 REVERSE LENGTH=539	2023.55	495.192	485.195	426.145	558.248	363.667	1625.98	471.593	409.618	542.015	377.34	393.192	-4.08639	-4.17059	-4.7485	-3.62482	-5.56429	-3.44785	-3.9695	-2.99988	-4.30906	-4.13533
Bra016072	AT1G72290.1	Symbols: | Kunitz family trypsin and protease inhibitor protein | chr1:27215852-27216499 FORWARD LENGTH=215	3669.99	396.767	462.009	581.419	454.2	661.857	1976.54	77.6419	62.4314	65.7741	72.7576	89.241	-9.24974	-7.94355	-6.31213	-8.08012	-5.54499	-25.4571	-31.6594	-30.0504	-27.1661	-22.1483
Bra029363	AT5G23210.1	Symbols: SCPL34 | serine carboxypeptidase-like 34 | chr5:7810892-7814837 FORWARD LENGTH=499	3934.89	1495.77	1240.36	1119.53	1210.96	713.579	4322.94	871.997	914.581	1142.4	627.229	486.645	-2.63068	-3.17238	-3.51477	-3.2494	-5.5143	-4.95752	-4.72669	-3.78409	-6.89212	-8.88315
Bra021101	AT3G16530.1	Symbols: | Legume lectin family protein | chr3:5624586-5625416 REVERSE LENGTH=276	4625.27	1125.87	1175.11	1005.56	594.419	839.034	5004.73	1164.54	441.464	588.155	405.848	396.622	-4.10817	-3.93603	-4.5997	-7.78116	-5.51261	-4.2976	-11.3367	-8.5092	-12.3315	-12.6184
Bra006186	AT5G13180.1	Symbols: ANAC083, VNI2, NAC083 | NAC domain containing protein 83 | chr5:4196643-4197577 FORWARD LENGTH=252	1269.31	402.618	308.775	430.875	352.138	230.452	1195.73	399.135	379.065	376.229	285.767	396.137	-3.15264	-4.11079	-2.94589	-3.60458	-5.50791	-2.9958	-3.15442	-3.1782	-4.18428	-3.01848
Bra017111	AT2G38640.1	Symbols: | Protein of unknown function (DUF567) | chr2:16157725-16158474 REVERSE LENGTH=196	874.404	197.164	136.042	172.454	296.204	159.515	767.423	160.098	116.768	113.595	99.7358	78.0764	-4.43491	-6.42746	-5.07036	-2.95203	-5.48164	-4.79346	-6.5722	-6.75578	-7.69456	-9.82913
Bra007630	AT3G61750.1	Symbols: | Cytochrome b561/ferric reductase transmembrane with DOMON related domain | chr3:22857897-22859254 REVERSE LENGTH=398	1227.36	211.602	81.7668	114.619	168.321	224.521	1734.57	401.283	358.502	280.747	254.1	348.849	-5.80032	-15.0105	-10.7082	-7.29178	-5.46657	-4.32256	-4.83838	-6.17841	-6.82633	-4.97227
Bra015435	AT1G05560.1	Symbols: UGT1, UGT75B1 | UDP-glucosyltransferase 75B1 | chr1:1645674-1647083 REVERSE LENGTH=469	10451.2	2871.06	2835.69	2212.52	2845.76	1918.6	6825.19	1889.81	2464.25	2147.44	1034.75	1042.6	-3.64019	-3.68559	-4.72366	-3.67255	-5.44731	-3.61157	-2.76968	-3.17829	-6.59598	-6.54632
Bra001080	AT3G03550.1	Symbols: | RING/U-box superfamily protein | chr3:850391-851461 REVERSE LENGTH=356	616.405	244.765	186.84	196.275	181.853	113.499	1157.93	531.015	385.717	433.941	399.284	399.566	-2.51835	-3.29911	-3.14052	-3.38958	-5.43093	-2.1806	-3.00202	-2.6684	-2.90002	-2.89797
Bra038058	AT4G15940.1	Symbols: | Fumarylacetoacetate (FAA) hydrolase family | chr4:9038361-9040163 FORWARD LENGTH=222	1476.4	409.507	727.274	413.238	372.241	272.903	1689.61	761.035	564.621	544.744	315.242	338.905	-3.60531	-2.03005	-3.57276	-3.96625	-5.40998	-2.22015	-2.99247	-3.10166	-5.35972	-4.9855
Bra009300	AT5G07010.1	Symbols: ATST2A, ST2A | sulfotransferase 2A | chr5:2174960-2176039 REVERSE LENGTH=359	8594.54	836.237	1410.2	957.564	1826.17	1591.7	7362.13	2538.62	2217.85	1547.71	783.222	523.933	-10.2776	-6.09455	-8.97542	-4.70632	-5.3996	-2.90005	-3.31949	-4.75679	-9.3998	-14.0517
Bra018645	AT1G08180.1	Symbols: | unknown protein; Has 53 Blast hits to 53 proteins in 9 species: Archae - 0; Bacteria - 0; Metazoa - 1; Fungi - 0; Plants - 52; Viruses - 0; Other Eukaryotes - 0 (source: NCBI BLink). | chr1:2564741-2565076 REVERSE LENGTH=111	2864.47	1162.54	963.075	845.136	902.057	532.366	3702.28	1819.21	898.485	1017.94	861.745	774.62	-2.46398	-2.9743	-3.38936	-3.17549	-5.38064	-2.0351	-4.12058	-3.63703	-4.29626	-4.77948
Bra009250	AT5G07580.1	Symbols: | Integrase-type DNA-binding superfamily protein | chr5:2399525-2400349 FORWARD LENGTH=274	8575.31	1163.87	1609.62	1366.05	2724.89	1594.46	4303.45	899.645	989.857	1009.39	579.457	621.459	-7.36793	-5.32754	-6.27745	-3.14703	-5.37819	-4.7835	-4.34755	-4.26342	-7.42669	-6.92475
Bra034657	AT4G34840.1	Symbols: ATMTN2, ATMTAN2, MTN2, MTAN2 | Phosphorylase superfamily protein | chr4:16606299-16607748 FORWARD LENGTH=254	1900.89	719.736	454.809	521.127	605.227	356.549	2335.76	1050.32	683.801	840.323	552.099	628.34	-2.64109	-4.17953	-3.64765	-3.14079	-5.33136	-2.22386	-3.41585	-2.7796	-4.23069	-3.71735
Bra000513	NA	NA	2045.97	432.352	430.399	423.442	300.598	386.197	2665.52	585.321	336.729	352.739	252.152	271.84	-4.73219	-4.75366	-4.83176	-6.80633	-5.29774	-4.55395	-7.91592	-7.55664	-10.5711	-9.80547
Bra016399	AT1G21920.1	Symbols: | Histone H3 K4-specific methyltransferase SET7/9 family protein | chr1:7704454-7705866 REVERSE LENGTH=417	2870.35	619.442	647.979	517.145	890.794	545.1	2469.93	1194.17	532.471	564.482	442.433	414.855	-4.63377	-4.4297	-5.55038	-3.22224	-5.26573	-2.06832	-4.63862	-4.37557	-5.58261	-5.95372
Bra037264	AT2G17630.1	Symbols: | Pyridoxal phosphate (PLP)-dependent transferases superfamily protein | chr2:7666637-7667905 FORWARD LENGTH=422	5017.2	1136.05	1055.32	1203.71	1074.72	953.624	1504.92	482.025	596.984	466.572	395.764	377.978	-4.41635	-4.7542	-4.16811	-4.66838	-5.26119	-3.12208	-2.52087	-3.22548	-3.80257	-3.9815
Bra009569	AT5G02760.1	Symbols: | Protein phosphatase 2C family protein | chr5:625377-626817 FORWARD LENGTH=370	6542.07	853.153	636.817	1098.77	1299.04	1243.98	1015.1	265.711	178.905	381.789	249.625	176.479	-7.66811	-10.2731	-5.95399	-5.03608	-5.25898	-3.82032	-5.67396	-2.6588	-4.0665	-5.75196
Bra018591	AT1G08930.1	Symbols: ERD6 | Major facilitator superfamily protein | chr1:2873604-2876979 FORWARD LENGTH=496	3498.11	1626.31	1180.38	777.709	953.081	665.191	7297.48	3288.99	3222.31	3144.34	2586.38	2098.33	-2.15095	-2.96355	-4.49797	-3.67032	-5.25881	-2.21876	-2.26467	-2.32083	-2.8215	-3.47776
Bra000203	AT2G40750.1	Symbols: WRKY54, ATWRKY54 | WRKY DNA-binding protein 54 | chr2:17000636-17002354 REVERSE LENGTH=346	2256.67	302.166	659.052	524.911	896.645	430.322	1033.55	291.488	229.719	238.82	142.483	115.895	-7.46831	-3.42412	-4.29915	-2.51679	-5.24414	-3.54577	-4.49919	-4.32774	-7.25385	-8.91799
Bra022735	AT5G54630.1	Symbols: | zinc finger protein-related | chr5:22192607-22194260 REVERSE LENGTH=472	1588.6	521.201	443.342	353.444	332.054	303.154	1096.42	542.636	267.835	248.663	231.183	324.821	-3.04796	-3.58324	-4.49463	-4.78416	-5.24024	-2.02054	-4.09364	-4.40926	-4.74265	-3.37546
Bra032530	AT2G02955.1	Symbols: MEE12 | maternal effect embryo arrest 12 | chr2:859592-861772 FORWARD LENGTH=666	1215.88	351.664	321.951	490.83	475.573	232.09	932.711	274.435	376.322	274.105	341.549	292.489	-3.4575	-3.7766	-2.47719	-2.55666	-5.23883	-3.39866	-2.47849	-3.40275	-2.73083	-3.18888
Bra036955	AT1G44750.2	Symbols: ATPUP11, PUP11 | purine permease 11 | chr1:16893825-16895168 FORWARD LENGTH=367	981.454	225.035	166.748	253.193	204.329	187.84	941.327	426.406	309.434	379.479	328.136	392.172	-4.36134	-5.88585	-3.87631	-4.8033	-5.22495	-2.20758	-3.04209	-2.48058	-2.86871	-2.40029
Bra029813	AT3G10040.1	Symbols: | sequence-specific DNA binding transcription factors | chr3:3096580-3097875 REVERSE LENGTH=431	2743.89	737.753	765.836	706.479	690.019	525.722	1810.77	623.349	719.749	814.441	862.384	801.665	-3.71925	-3.58287	-3.88389	-3.97654	-5.21928	-2.90491	-2.51584	-2.22333	-2.09973	-2.25876
Bra013480	AT4G20880.1	Symbols: | ethylene-responsive nuclear protein / ethylene-regulated nuclear protein (ERT2) | chr4:11179389-11180606 REVERSE LENGTH=405	4537.67	941.644	983.394	945.311	1164.75	870.656	3141.84	1128.93	1171.78	1162.33	1162.1	985.422	-4.81888	-4.61429	-4.80019	-3.89583	-5.21178	-2.78302	-2.68125	-2.70305	-2.70359	-3.18832
Bra013446	AT4G20140.1	Symbols: GSO1 | Leucine-rich repeat transmembrane protein kinase | chr4:10884220-10888045 FORWARD LENGTH=1249	1259.76	207.284	167.443	142.159	199.914	242.5	989.766	324.056	116.829	135.84	125.547	127.364	-6.07746	-7.52352	-8.86163	-6.30151	-5.19489	-3.05431	-8.47192	-7.28626	-7.88363	-7.77116
Bra040274	AT3G06490.1	Symbols: MYB108, AtMYB108, BOS1 | myb domain protein 108 | chr3:2004298-2006358 FORWARD LENGTH=323	1449.84	453.099	377.119	320.412	379.738	283.895	665.655	241.184	305.995	265.523	190.126	103.218	-3.19983	-3.84452	-4.52492	-3.818	-5.10696	-2.75995	-2.17538	-2.50696	-3.50113	-6.44902
Bra030702	AT1G07720.1	Symbols: KCS3 | 3-ketoacyl-CoA synthase 3 | chr1:2390970-2392406 REVERSE LENGTH=478	6227.76	608.283	613.906	849.219	667.23	1220.39	3834.22	928.085	509.691	549.387	689.317	853.359	-10.2383	-10.1445	-7.33351	-9.33375	-5.10309	-4.13132	-7.52264	-6.97909	-5.56235	-4.49309
Bra020663	AT5G49100.1	Symbols: | unknown protein; BEST Arabidopsis thaliana protein match is: unknown protein (TAIR:AT3G06868.1); Has 30201 Blast hits to 17322 proteins in 780 species: Archae - 12; Bacteria - 1396; Metazoa - 17338; Fungi - 3422; Plants - 5037; Viruses - 0; Other Eukaryotes - 2996 (source: NCBI BLink). | chr5:19897700-19898890 REVERSE LENGTH=396	1808.68	213.366	157.339	311.432	196.202	354.978	1363.08	162.665	130.625	208.917	159.084	203.569	-8.47689	-11.4954	-5.80762	-9.21846	-5.09519	-8.37968	-10.4351	-6.5245	-8.5683	-6.69591
Bra004581	AT2G40610.1	Symbols: ATEXPA8, EXP8, ATEXP8, ATHEXP ALPHA 1.11, EXPA8 | expansin A8 | chr2:16949121-16950472 REVERSE LENGTH=253	20479.1	4532.24	4064.95	4365.29	4039.46	4026.19	10220.3	3112.14	1727.56	2075.28	1455.48	1402.79	-4.51854	-5.03797	-4.69135	-5.06976	-5.08647	-3.28401	-5.91603	-4.92478	-7.02194	-7.28569
Bra002949	AT5G54860.1	Symbols: | Major facilitator superfamily protein | chr5:22284721-22287025 FORWARD LENGTH=491	684.414	267.422	184.579	181.003	165.915	134.563	627.922	294.404	221.45	191.646	115.147	132.062	-2.5593	-3.70797	-3.78123	-4.12509	-5.0862	-2.13286	-2.8355	-3.27647	-5.45322	-4.75475
Bra031903	AT5G64750.1	Symbols: ABR1 | Integrase-type DNA-binding superfamily protein | chr5:25891679-25893656 FORWARD LENGTH=391	6419.79	1290.23	1620.59	1304.67	1636.49	1265.5	7076.19	2771.26	1934.05	1987.34	1136.53	796.206	-4.97569	-3.96139	-4.92062	-3.9229	-5.07293	-2.55342	-3.65874	-3.56063	-6.22614	-8.88739
Bra027996	AT4G10270.1	Symbols: | Wound-responsive family protein | chr4:6374805-6375077 FORWARD LENGTH=90	11007.7	1645.16	1539.68	1638.41	1655.02	2171.54	11697.9	2936.14	2188.76	2269.68	2044.91	2003.42	-6.69096	-7.14934	-6.71853	-6.6511	-5.06908	-3.98411	-5.34453	-5.15399	-5.7205	-5.83897
Bra028510	AT5G41860.1	Symbols: | unknown protein; Has 1807 Blast hits to 1807 proteins in 277 species: Archae - 0; Bacteria - 0; Metazoa - 736; Fungi - 347; Plants - 385; Viruses - 0; Other Eukaryotes - 339 (source: NCBI BLink). | chr5:16757951-16758529 FORWARD LENGTH=192	2395.19	399.785	382.905	404.725	608.875	473.488	2533.15	623.034	676.849	959.449	613.82	763.637	-5.9912	-6.25531	-5.91807	-3.9338	-5.05861	-4.06583	-3.74256	-2.64021	-4.12686	-3.31722
Bra032857	AT1G27950.1	Symbols: LTPG1 | glycosylphosphatidylinositol-anchored lipid protein transfer 1 | chr1:9740740-9741991 FORWARD LENGTH=193	9622.88	1292.39	952.175	1425.82	1150.79	1902.91	5653.05	1321.64	502.822	764.072	831.63	1091.16	-7.4458	-10.1062	-6.74901	-8.36198	-5.05693	-4.2773	-11.2426	-7.39858	-6.79755	-5.18077
Bra026470	AT5G24070.1	Symbols: | Peroxidase superfamily protein | chr5:8134301-8135991 REVERSE LENGTH=340	876.692	257.239	273.388	236.519	249.804	173.896	1655.37	373.767	411.476	502.247	326.691	245.47	-3.40808	-3.20677	-3.70665	-3.50952	-5.04147	-4.42888	-4.023	-3.29593	-5.06708	-6.74368
Bra004421	NA	NA	2353.8	691.977	796.75	674.339	677.052	468.57	2492.98	656.479	737.074	733.554	574.272	581.808	-3.40156	-2.95425	-3.49053	-3.47654	-5.02337	-3.7975	-3.38227	-3.3985	-4.34111	-4.28488
Bra017779	AT4G35120.1	Symbols: | Galactose oxidase/kelch repeat superfamily protein | chr4:16716806-16718017 FORWARD LENGTH=389	2015.03	700.007	532.999	447.756	473.585	401.398	2322.34	1149.47	925.274	1139.86	670.356	689.776	-2.87859	-3.78055	-4.50029	-4.25484	-5.02003	-2.02036	-2.50989	-2.03739	-3.46434	-3.3668
Bra036198	AT3G30390.1	Symbols: | Transmembrane amino acid transporter family protein | chr3:11977112-11978827 REVERSE LENGTH=460	5309.28	1581.88	1433.8	1404.01	1195.61	1057.65	9196.98	4590.12	2323.68	2198.46	1777.17	1522.69	-3.35631	-3.70294	-3.78151	-4.44065	-5.01988	-2.00365	-3.95794	-4.18337	-5.17507	-6.03996
Bra039559	AT4G15240.1	Symbols: | Protein of unknown function (DUF604) | chr4:8703518-8705378 REVERSE LENGTH=488	1784.65	547.062	470.682	501.44	498.988	356.599	1619.36	760.729	511.765	634.33	539.868	472.248	-3.26224	-3.79163	-3.55905	-3.57654	-5.00464	-2.12869	-3.16426	-2.55287	-2.99955	-3.42905
Bra011821	AT4G39950.1	Symbols: CYP79B2 | cytochrome P450, family 79, subfamily B, polypeptide 2 | chr4:18525311-18527284 FORWARD LENGTH=541	7464.2	1915.67	1681.44	1538.91	1117.12	1496.37	5369.72	1860.22	1684.84	2033.23	1454.51	1718.96	-3.89639	-4.43917	-4.85032	-6.68165	-4.9882	-2.8866	-3.18708	-2.64098	-3.69177	-3.12382
Bra027654	AT1G63670.1	Symbols: | Protein of unknown function (DUF3741) | chr1:23607527-23610003 REVERSE LENGTH=689	2200.65	514.989	492.603	515.343	549.299	442.266	1733.87	797.489	539.475	552.618	446.017	592.309	-4.2732	-4.46739	-4.27026	-4.00629	-4.97585	-2.17416	-3.214	-3.13756	-3.88745	-2.92731
Bra003774	AT1G75030.1	Symbols: ATLP-3, TLP-3 | thaumatin-like protein 3 | chr1:28174418-28175255 FORWARD LENGTH=246	1417.05	400.601	552.254	415.469	410.065	285.876	1089.33	541.709	273.498	352.007	230.229	430.472	-3.53731	-2.56594	-3.41072	-3.45567	-4.95687	-2.01091	-3.98295	-3.09463	-4.73151	-2.53055
Bra004191	AT1G66830.1	Symbols: | Leucine-rich repeat protein kinase family protein | chr1:24930700-24932834 REVERSE LENGTH=685	11237.2	2804.64	2426.58	2869.98	2958.56	2267.9	5255.64	1553.22	1539.57	1539.12	1432	1216.84	-4.00665	-4.63088	-3.91543	-3.7982	-4.95489	-3.38371	-3.41371	-3.4147	-3.67014	-4.31909
Bra028690	AT5G07580.1	Symbols: | Integrase-type DNA-binding superfamily protein | chr5:2399525-2400349 FORWARD LENGTH=274	885.451	219.781	262.379	247.807	242.285	179.153	795.386	190.969	208.294	180.478	173.938	140.036	-4.02879	-3.3747	-3.57315	-3.65458	-4.94243	-4.165	-3.81857	-4.40711	-4.57281	-5.67987
Bra006877	AT3G51790.1	Symbols: ATG1, TG1 | transmembrane protein G1P-related 1 | chr3:19209893-19210663 REVERSE LENGTH=256	2671.04	711.292	852.609	688.076	867.095	541.954	2222.6	931.669	1027.27	1110.88	898.36	880.516	-3.75519	-3.13278	-3.8819	-3.08045	-4.92854	-2.38561	-2.1636	-2.00076	-2.47406	-2.5242
Bra024395	AT5G65530.1	Symbols: | Protein kinase superfamily protein | chr5:26190844-26192826 REVERSE LENGTH=456	12832.6	1623.53	1795.92	1705.34	2210.95	2603.81	3078.17	1038.32	668.891	623.71	656.971	700.182	-7.90413	-7.14542	-7.52495	-5.80411	-4.92839	-2.96457	-4.6019	-4.93526	-4.6854	-4.39624
Bra040236	AT3G06035.1	Symbols: | Glycoprotein membrane precursor GPI-anchored | chr3:1823172-1824110 REVERSE LENGTH=200	1582.12	260.863	208.294	398.936	325.631	321.229	2105.69	459.188	243.991	229.074	215.621	244.111	-6.06495	-7.59561	-3.96585	-4.85863	-4.92521	-4.58568	-8.6302	-9.19218	-9.7657	-8.62595
Bra011771	AT4G37520.1	Symbols: | Peroxidase superfamily protein | chr4:17631704-17633060 FORWARD LENGTH=329	6565.52	2285.61	1909.72	1666.55	1663.41	1334.77	2743.51	1349.54	987.181	939.775	873.629	836.257	-2.87255	-3.43795	-3.93959	-3.94702	-4.91884	-2.03292	-2.77914	-2.91933	-3.14036	-3.2807
Bra036278	AT4G02330.1	Symbols: ATPMEPCRB | Plant invertase/pectin methylesterase inhibitor superfamily | chr4:1032479-1034928 FORWARD LENGTH=573	9673.03	3242.37	3321.04	2983.9	2560.09	1966.75	10705.4	4015.85	3218.12	3875.67	2089.7	2413.46	-2.98332	-2.91265	-3.24174	-3.77839	-4.91828	-2.66579	-3.3266	-2.76221	-5.12294	-4.43571
Bra004888	AT2G45080.1	Symbols: cycp3;1 | cyclin p3;1 | chr2:18591688-18592443 FORWARD LENGTH=222	3322.28	446.142	412.036	584.201	730.781	675.936	2429.49	487.174	295.448	236.072	94.4372	187.941	-7.44669	-8.06308	-5.68688	-4.5462	-4.91508	-4.9869	-8.22307	-10.2913	-25.726	-12.9269
Bra018602	AT1G08770.1	Symbols: PRA1.E | prenylated RAB acceptor 1.E | chr1:2808933-2809562 FORWARD LENGTH=209	2221.98	701.932	860.985	696.805	642.174	454.582	2642.9	1302.78	891.046	1184.06	881.654	1019.73	-3.16552	-2.58074	-3.18881	-3.46009	-4.88796	-2.02866	-2.96606	-2.23207	-2.99766	-2.59176
Bra004392	AT1G69530.1	Symbols: ATEXPA1, EXP1, AT-EXP1, ATEXP1, ATHEXP ALPHA 1.2, EXPA1 | expansin A1 | chr1:26142034-26143051 FORWARD LENGTH=250	3247.06	1068.72	784.465	1077.38	840.377	664.988	2522.02	716.219	468.793	836.298	788.156	745.487	-3.03827	-4.1392	-3.01385	-3.86381	-4.88289	-3.5213	-5.37982	-3.0157	-3.1999	-3.38305
Bra003981	AT1G69760.1	Symbols: | unknown protein; BEST Arabidopsis thaliana protein match is: unknown protein (TAIR:AT1G26920.1); Has 51 Blast hits to 51 proteins in 15 species: Archae - 0; Bacteria - 2; Metazoa - 2; Fungi - 7; Plants - 29; Viruses - 0; Other Eukaryotes - 11 (source: NCBI BLink). | chr1:26240094-26240627 REVERSE LENGTH=177	2266.86	415.053	609.848	554.145	472.109	464.774	1253.39	389.387	203.989	246.359	174.118	196.09	-5.46162	-3.71709	-4.09073	-4.80156	-4.87734	-3.21888	-6.1444	-5.08766	-7.19851	-6.39191
Bra001721	AT3G18773.1	Symbols: | RING/U-box superfamily protein | chr3:6466304-6466966 FORWARD LENGTH=220	1623.11	445.386	340.599	325.47	356.632	333.963	1576.69	402.786	341.622	219.331	197.248	170.594	-3.64428	-4.76546	-4.98697	-4.55122	-4.86015	-3.91446	-4.61531	-7.18863	-7.99344	-9.24235
Bra012777	AT4G15610.1	Symbols: | Uncharacterised protein family (UPF0497) | chr4:8909162-8910641 FORWARD LENGTH=193	8553.76	799.534	1735.67	1697.87	1402.78	1763.25	9587.71	1764.83	1239.42	1444.09	1253.03	672.15	-10.6984	-4.92822	-5.03794	-6.09772	-4.85113	-5.43265	-7.73564	-6.63927	-7.65162	-14.2642
Bra000079	AT2G38640.1	Symbols: | Protein of unknown function (DUF567) | chr2:16157725-16158474 REVERSE LENGTH=196	687.037	308.207	280.025	216.232	226.228	141.926	799.847	311.256	200.068	174.764	119.088	141.74	-2.22914	-2.45348	-3.17731	-3.03692	-4.84081	-2.56974	-3.99788	-4.57673	-6.71644	-5.64306
Bra031489	AT1G60660.1	Symbols: B5 #5, ATCB5LP, CB5LP | cytochrome B5-like protein | chr1:22342589-22342954 REVERSE LENGTH=121	551.449	124.565	177.028	196.1	222.782	114.02	1369.3	541.791	408.228	389.857	422.747	519.489	-4.427	-3.11504	-2.81208	-2.47529	-4.83642	-2.52736	-3.35425	-3.51231	-3.23905	-2.63586
Bra037791	AT5G64700.1	Symbols: | nodulin MtN21 /EamA-like transporter family protein | chr5:25865190-25866845 REVERSE LENGTH=359	587.215	111.995	67.7778	80.8722	72.3248	121.451	1521.97	235.904	216.238	272.618	260.126	229.137	-5.24323	-8.66383	-7.26102	-8.11914	-4.835	-6.45165	-7.0384	-5.58279	-5.8509	-6.64218
Bra007869	AT1G69600.1	Symbols: ZFHD1, ATHB29, ZHD11 | zinc finger homeodomain 1 | chr1:26182470-26183198 FORWARD LENGTH=242	2395.17	562.285	607.934	547.933	731.237	495.443	3915.23	1090.3	1189.81	1239.18	921.857	894.637	-4.25971	-3.93985	-4.37128	-3.2755	-4.8344	-3.59097	-3.29063	-3.15953	-4.24711	-4.37633
Bra005021	AT2G39710.1	Symbols: | Eukaryotic aspartyl protease family protein | chr2:16562051-16563379 REVERSE LENGTH=442	6588.92	1540.9	1746.85	1747.06	1538.73	1379.37	4850.41	1680.65	1464.89	1722.27	1005.5	1277.55	-4.27602	-3.77189	-3.77143	-4.28205	-4.77676	-2.88603	-3.31111	-2.81629	-4.82388	-3.79665
Bra028301	AT5G52240.1	Symbols: MSBP1, ATMP1, AtMAPR5 | membrane steroid binding protein 1 | chr5:21213121-21214557 FORWARD LENGTH=220	702.349	133.013	195.183	154.692	182.219	147.387	1172.26	455.512	378.208	330.702	414.998	422.989	-5.2803	-3.59841	-4.54031	-3.85442	-4.76534	-2.5735	-3.09951	-3.54476	-2.82474	-2.77137
Bra033976	AT1G67820.1	Symbols: | Protein phosphatase 2C family protein | chr1:25429882-25431484 FORWARD LENGTH=445	1448.18	328.779	476.82	356.007	427.525	304.077	930.719	462.871	418.423	359.38	409.279	440.321	-4.40472	-3.03716	-4.06784	-3.38736	-4.76254	-2.01075	-2.22435	-2.58979	-2.27405	-2.11373
Bra025192	AT3G26200.1	Symbols: CYP71B22 | cytochrome P450, family 71, subfamily B, polypeptide 22 | chr3:9589347-9590972 FORWARD LENGTH=500	3839.05	723.367	530.523	705.656	785.158	808.898	3889.81	497.392	361.336	544.118	477.164	906.219	-5.3072	-7.23635	-5.4404	-4.88953	-4.74602	-7.82041	-10.7651	-7.14884	-8.15194	-4.29235
Bra012032	AT2G27180.1	Symbols: | unknown protein; BEST Arabidopsis thaliana protein match is: unknown protein (TAIR:AT3G11690.1); Has 99 Blast hits to 99 proteins in 14 species: Archae - 0; Bacteria - 0; Metazoa - 0; Fungi - 0; Plants - 99; Viruses - 0; Other Eukaryotes - 0 (source: NCBI BLink). | chr2:11620473-11620970 FORWARD LENGTH=165	1150.13	300.156	325.372	214.271	204.692	242.714	1335.7	579.885	414.888	453.108	272.673	230.489	-3.83177	-3.53482	-5.36764	-5.61883	-4.73862	-2.30339	-3.21942	-2.94786	-4.89854	-5.79507
Bra003507	AT3G62690.1	Symbols: ATL5 | AtL5 | chr3:23185829-23186602 REVERSE LENGTH=257	2081.27	519.573	626.044	554.721	577.729	440.505	1901.05	452.716	411.97	602.351	441.634	337.55	-4.00573	-3.32448	-3.75192	-3.6025	-4.72474	-4.19921	-4.61454	-3.15605	-4.30458	-5.63191
Bra011680	AT4G36410.1	Symbols: UBC17 | ubiquitin-conjugating enzyme 17 | chr4:17201969-17202890 FORWARD LENGTH=161	14779.3	2793.82	3533.96	3155.89	4413.3	3131.48	8574.72	2663.66	2890.66	2041.51	1764.88	1804.02	-5.29	-4.18208	-4.68308	-3.34881	-4.71959	-3.21915	-2.96635	-4.20019	-4.85853	-4.75312
Bra012899	AT3G50440.1	Symbols: ATMES10, MES10 | methyl esterase 10 | chr3:18717392-18718435 REVERSE LENGTH=288	2221.37	655.287	856	609.127	676.914	473.485	2259.99	922.096	898.043	1025.23	896.082	469.33	-3.38992	-2.59506	-3.64681	-3.28161	-4.69153	-2.45093	-2.51657	-2.20437	-2.52208	-4.81535
Bra026550	AT2G03450.1	Symbols: PAP9, ATPAP9 | purple acid phosphatase 9 | chr2:1041528-1043569 FORWARD LENGTH=651	1467.46	336.927	303.293	377.285	278.284	315.861	1534.61	415.676	329.242	451.976	245.657	299.747	-4.35542	-4.83842	-3.88953	-5.27325	-4.6459	-3.69184	-4.66104	-3.39534	-6.24696	-5.11968
Bra009100	AT5G05260.1	Symbols: CYP79A2 | cytochrome p450 79a2 | chr5:1559778-1561765 REVERSE LENGTH=523	1451.21	251.627	418.487	407.599	309.442	312.683	1004.95	264.468	412.483	247.375	361.266	245.581	-5.76731	-3.46775	-3.56039	-4.68976	-4.64115	-3.79989	-2.43634	-4.06246	-2.78175	-4.09213
Bra029882	AT3G10960.1	Symbols: ATAZG1, AZG1 | AZA-guanine resistant1 | chr3:3424986-3426725 REVERSE LENGTH=579	1412.44	380.084	263.158	331.7	323.53	306.629	3896.51	1469.19	1017.45	1157.16	835.445	891.494	-3.71613	-5.36727	-4.25819	-4.36572	-4.60635	-2.65215	-3.82968	-3.3673	-4.66399	-4.37076
Bra000315	AT2G43620.1	Symbols: | Chitinase family protein | chr2:18093954-18095025 REVERSE LENGTH=283	4404.66	390.007	636.729	525.321	634.358	957.294	8820.66	1475.05	1312	1623.21	484.057	816.085	-11.2938	-6.91764	-8.3847	-6.94349	-4.60116	-5.97991	-6.72306	-5.43408	-18.2224	-10.8085
Bra008728	AT5G14940.1	Symbols: | Major facilitator superfamily protein | chr5:4831748-4834312 REVERSE LENGTH=552	1243.91	365.637	280.142	276.897	505.59	270.985	1009.05	246.299	341.302	318.66	337.86	277.523	-3.40204	-4.44028	-4.49232	-2.46031	-4.59033	-4.09685	-2.95647	-3.16654	-2.98659	-3.63591
Bra017065	AT2G39530.1	Symbols: | Uncharacterised protein family (UPF0497) | chr2:16498659-16499401 REVERSE LENGTH=178	19256.9	3099.47	5522.27	4500.33	5174.29	4196.91	22020.9	10768.4	9215.41	10869.8	3510.66	4618.59	-6.21297	-3.48713	-4.279	-3.72165	-4.58835	-2.04496	-2.38957	-2.02588	-6.27258	-4.76788
Bra004604	AT2G41180.1	Symbols: | VQ motif-containing protein | chr2:17165242-17165667 FORWARD LENGTH=141	1960.99	741.923	638.449	512.572	570.052	427.626	1849.98	679.083	383.528	202.067	354.3	198.587	-2.64312	-3.07149	-3.82578	-3.44002	-4.58576	-2.72423	-4.82359	-9.15528	-5.22151	-9.31572
Bra030040	AT1G27360.1	Symbols: SPL11 | squamosa promoter-like 11 | chr1:9502139-9503715 FORWARD LENGTH=393	958.942	202.198	174.943	182.563	111.511	209.322	1003.46	370.971	385.163	164.313	108.589	145.643	-4.74259	-5.48145	-5.25266	-8.59953	-4.58118	-2.70496	-2.60529	-6.107	-9.2409	-6.88986
Bra025774	AT1G19840.1	Symbols: | SAUR-like auxin-responsive protein family | chr1:6872794-6873255 REVERSE LENGTH=153	1453.47	308.627	214.96	414.637	323.247	318.193	675.406	266.617	243.922	221.543	160.192	199.756	-4.70947	-6.76158	-3.5054	-4.49647	-4.56789	-2.53324	-2.76894	-3.04865	-4.21623	-3.38116
Bra004951	AT2G45970.1	Symbols: CYP86A8, LCR | cytochrome P450, family 86, subfamily A, polypeptide 8 | chr2:18912548-18914161 REVERSE LENGTH=537	2065.3	655.12	493.546	640.79	529.323	452.312	1682.58	758.961	637.662	522.195	439.272	451.515	-3.15255	-4.18462	-3.22305	-3.90178	-4.5661	-2.21695	-2.63867	-3.22213	-3.83038	-3.72652
Bra007552	AT3G60690.1	Symbols: | SAUR-like auxin-responsive protein family | chr3:22435262-22435774 FORWARD LENGTH=170	984.172	401.695	467.524	401.67	354.568	215.618	1186.1	418.87	429.507	476.522	331.867	275.112	-2.45005	-2.10507	-2.4502	-2.77569	-4.56442	-2.83167	-2.76154	-2.48908	-3.57402	-4.31134
Bra004067	AT1G67850.1	Symbols: | Protein of unknown function (DUF707) | chr1:25439204-25441904 FORWARD LENGTH=404	4629.65	1323.3	1872.28	1258.12	1196.2	1022.05	3632.2	1660.81	1509.37	1473.93	1190.84	1258.79	-3.49856	-2.47273	-3.67982	-3.8703	-4.52977	-2.18701	-2.40643	-2.4643	-3.05012	-2.88547
Bra014506	AT3G60200.1	Symbols: | unknown protein; BEST Arabidopsis thaliana protein match is: unknown protein (TAIR:AT2G44600.1); Has 60 Blast hits to 60 proteins in 12 species: Archae - 0; Bacteria - 0; Metazoa - 8; Fungi - 0; Plants - 51; Viruses - 0; Other Eukaryotes - 1 (source: NCBI BLink). | chr3:22249320-22250237 FORWARD LENGTH=305	2446.07	874.682	997.101	769.27	710.959	540.615	2643.4	1201.88	774.21	1023.68	737.808	601.49	-2.79652	-2.45318	-3.17973	-3.44052	-4.52461	-2.19939	-3.41432	-2.58225	-3.58277	-4.39475
Bra022443	NA	NA	7077.44	1320.2	1282.85	1235.77	1697.09	1581.36	5647.14	1635.26	1279.67	1721.16	1291.72	1608.27	-5.36088	-5.51697	-5.72715	-4.17034	-4.47554	-3.45336	-4.41297	-3.28101	-4.3718	-3.51131
Bra001798	AT3G20640.1	Symbols: | basic helix-loop-helix (bHLH) DNA-binding superfamily protein | chr3:7210654-7213199 REVERSE LENGTH=454	881.883	400.017	306.639	317.311	311.471	200.118	765.022	327.181	217.794	268.83	197.201	180.906	-2.20461	-2.87596	-2.77924	-2.83135	-4.40681	-2.33822	-3.51259	-2.84575	-3.8794	-4.22884
Bra009006	AT5G10770.1	Symbols: | Eukaryotic aspartyl protease family protein | chr5:3403331-3405331 REVERSE LENGTH=474	6966.29	1958.55	1826.91	1771.09	1603.33	1584.32	6926.06	2636.3	2085.37	2349.16	1979.17	1503.05	-3.55686	-3.81315	-3.93333	-4.34489	-4.39702	-2.62719	-3.32126	-2.94831	-3.49948	-4.608
Bra026572	AT2G02950.1	Symbols: PKS1 | phytochrome kinase substrate 1 | chr2:855149-856468 REVERSE LENGTH=439	1817.64	340.475	282.755	273.793	476.16	414.998	1601.71	395.269	152.183	250.73	184.563	280.174	-5.33854	-6.42832	-6.63874	-3.81729	-4.37988	-4.0522	-10.5249	-6.38819	-8.67839	-5.71684
Bra012430	AT1G27050.1	Symbols: ATHB54, HB54 | homeobox protein 54 | chr1:9393706-9394408 FORWARD LENGTH=205	2167.41	550.921	608.246	651.662	916.21	498.312	2126.51	926.3	810.747	573.189	1053.31	790.682	-3.93416	-3.56338	-3.32597	-2.36563	-4.3495	-2.2957	-2.6229	-3.70996	-2.01888	-2.68946
Bra033494	AT4G15550.1	Symbols: IAGLU | indole-3-acetate beta-D-glucosyltransferase | chr4:8877877-8879301 REVERSE LENGTH=474	8576.83	3414.89	2543.53	2268.02	2652.53	1977.4	5979.62	1708.51	1523.85	1189.28	1058.46	1220.24	-2.5116	-3.37202	-3.78164	-3.23345	-4.33743	-3.4999	-3.92402	-5.02793	-5.64936	-4.90036
Bra010076	AT5G62360.1	Symbols: | Plant invertase/pectin methylesterase inhibitor superfamily protein | chr5:25040699-25041310 FORWARD LENGTH=203	5744.14	1312.9	930.969	1345.75	1112.98	1330.13	3505.14	925.869	523.682	683.998	433.251	506.114	-4.37515	-6.17007	-4.26836	-5.16105	-4.31848	-3.78578	-6.69326	-5.12449	-8.09032	-6.92559
Bra023641	AT5G17850.1	Symbols: | Sodium/calcium exchanger family protein | chr5:5899253-5900932 FORWARD LENGTH=559	3469.53	1075.76	793.054	991.089	874.506	803.471	2298.43	946.669	875.941	816.774	705.146	890.568	-3.22519	-4.3749	-3.50072	-3.96742	-4.31818	-2.42791	-2.62396	-2.81403	-3.25951	-2.58086
Bra002278	AT5G19980.1	Symbols: GONST4 | golgi nucleotide sugar transporter 4 | chr5:6749907-6750932 REVERSE LENGTH=341	8251.68	1937.95	2399.01	2176.72	2109.54	1914.96	9489.75	2593.11	2016.06	2743.39	1653.26	1818.28	-4.25794	-3.43962	-3.79088	-3.9116	-4.30906	-3.6596	-4.70708	-3.45913	-5.74002	-5.21908
Bra005546	AT2G32920.1	Symbols: ATPDIL2-3, PDI9, ATPDI9, PDIL2-3 | PDI-like 2-3 | chr2:13962502-13965406 REVERSE LENGTH=440	3361.88	1364.48	1150.76	1179.71	839.524	780.247	4365.08	1835.25	1224.57	1201.66	1198.43	1486.1	-2.46385	-2.92144	-2.84975	-4.00451	-4.30874	-2.37847	-3.56458	-3.63254	-3.64233	-2.93727
Bra035897	AT5G62360.1	Symbols: | Plant invertase/pectin methylesterase inhibitor superfamily protein | chr5:25040699-25041310 FORWARD LENGTH=203	6452.95	1649.92	1015.1	1523.38	1386.72	1502.6	3988.53	788.913	439.661	763.499	584.969	520.992	-3.91107	-6.35696	-4.23594	-4.65339	-4.29452	-5.05573	-9.07183	-5.22401	-6.81836	-7.65565
Bra017057	AT2G39710.1	Symbols: | Eukaryotic aspartyl protease family protein | chr2:16562051-16563379 REVERSE LENGTH=442	4329.63	990.133	1115.42	1159.08	1068.11	1010.98	3426.48	1135.56	1180.63	1386	885.067	1148.93	-4.37278	-3.88161	-3.7354	-4.05354	-4.28261	-3.01744	-2.90225	-2.47221	-3.87144	-2.98232
Bra030846	AT1G55610.1	Symbols: BRL1 | BRI1 like | chr1:20779874-20783374 REVERSE LENGTH=1166	1461.17	443.396	349.393	384.052	430.515	342.044	1194.9	534.21	456.333	438.885	466.615	461.462	-3.29541	-4.18202	-3.80462	-3.394	-4.27188	-2.23676	-2.61848	-2.72258	-2.56078	-2.58938
Bra025093	AT5G45110.1	Symbols: NPR3, ATNPR3 | NPR1-like protein 3 | chr5:18229319-18231334 FORWARD LENGTH=586	5262.44	1331.73	1300.4	1497.36	1618.11	1233.45	4114.4	1962.38	1408.67	1376.25	1250.49	1182.16	-3.95158	-4.04679	-3.51448	-3.25221	-4.26644	-2.09664	-2.92077	-2.98957	-3.29023	-3.48041
Bra016267	AT1G69760.1	Symbols: | unknown protein; BEST Arabidopsis thaliana protein match is: unknown protein (TAIR:AT1G26920.1); Has 51 Blast hits to 51 proteins in 15 species: Archae - 0; Bacteria - 2; Metazoa - 2; Fungi - 7; Plants - 29; Viruses - 0; Other Eukaryotes - 11 (source: NCBI BLink). | chr1:26240094-26240627 REVERSE LENGTH=177	2143.66	492.534	459.389	435.222	451.736	502.59	2500.97	589.363	314.198	453.339	321.921	438.061	-4.35231	-4.66633	-4.92544	-4.74538	-4.26523	-4.24351	-7.95985	-5.51678	-7.76889	-5.70918
Bra004835	AT2G44450.1	Symbols: BGLU15 | beta glucosidase 15 | chr2:18340966-18343744 FORWARD LENGTH=506	4341.61	1567.97	1037.39	1130.08	523.316	1019.42	2504.39	974.032	701.24	676.855	512.098	470.137	-2.76894	-4.18513	-3.84186	-8.29634	-4.2589	-2.57116	-3.57137	-3.70004	-4.89045	-5.32694
Bra030246	AT2G22330.1	Symbols: CYP79B3 | cytochrome P450, family 79, subfamily B, polypeptide 3 | chr2:9488601-9490983 FORWARD LENGTH=543	4400.89	798.539	701.82	991.425	666.47	1039.09	1043.48	410.831	506.148	498.413	446.47	464.942	-5.51118	-6.27068	-4.43895	-6.60328	-4.23533	-2.53993	-2.06161	-2.09361	-2.33718	-2.24432
Bra038908	AT3G51600.1	Symbols: LTP5 | lipid transfer protein 5 | chr3:19138661-19139124 REVERSE LENGTH=118	3205.6	971.839	1045.28	920.016	817.502	758.137	5177.8	2221.75	1142.95	1908.54	1201.14	1567.17	-3.29849	-3.06674	-3.48429	-3.92121	-4.22826	-2.33051	-4.53021	-2.71296	-4.31074	-3.30392
Bra019726	AT2G32560.1	Symbols: | F-box family protein | chr2:13824820-13826761 FORWARD LENGTH=371	4045.36	889.632	885.24	890.794	971.577	957.037	3373.6	1207.16	1282.82	1148.49	888.711	852.748	-4.54723	-4.56979	-4.5413	-4.1637	-4.22696	-2.79466	-2.62983	-2.93742	-3.79606	-3.95615
Bra005747	AT5G02890.1	Symbols: | HXXXD-type acyl-transferase family protein | chr5:670207-671454 REVERSE LENGTH=353	885.438	349.311	178.825	442.36	194.674	211.008	1012.61	383.587	123.682	203.22	123.015	153.357	-2.53481	-4.95142	-2.00162	-4.54831	-4.19623	-2.63984	-8.18721	-4.98283	-8.2316	-6.60296
Bra020220	AT5G22860.1	Symbols: | Serine carboxypeptidase S28 family protein | chr5:7639511-7642945 REVERSE LENGTH=502	734.756	337.017	253.599	249.029	125.735	175.36	2170.79	587.812	397.418	541.274	452.772	406.481	-2.18017	-2.89731	-2.95048	-5.84369	-4.18999	-3.693	-5.46223	-4.01052	-4.79444	-5.34045
Bra036817	AT3G51320.1	Symbols: | Pentatricopeptide repeat (PPR) superfamily protein | chr3:19049853-19051445 REVERSE LENGTH=530	1088.27	289.71	245.936	274.655	264.571	259.821	888.683	381.928	319.581	325.523	229.355	408.402	-3.75641	-4.42501	-3.96232	-4.11334	-4.18854	-2.32683	-2.78078	-2.73002	-3.87471	-2.176
Bra014975	AT3G23730.1	Symbols: XTH16 | xyloglucan endotransglucosylase/hydrolase 16 | chr3:8550222-8551248 FORWARD LENGTH=291	10688	2599.56	1574.44	2456.16	1682.87	2556.2	15962.6	5607.22	2308.06	2833.48	1728.53	1863.67	-4.11147	-6.78845	-4.35151	-6.35106	-4.18121	-2.84679	-6.91602	-5.63357	-9.23478	-8.56514
Bra014420	AT3G61820.1	Symbols: | Eukaryotic aspartyl protease family protein | chr3:22880074-22881525 REVERSE LENGTH=483	3718.01	636.297	952.08	695.04	685.161	889.493	2771.86	976.931	573.745	767.646	413.609	617.946	-5.8432	-3.90514	-5.34935	-5.42648	-4.17992	-2.83731	-4.83117	-3.61086	-6.70164	-4.4856
Bra022668	AT5G53730.1	Symbols: | Late embryogenesis abundant (LEA) hydroxyproline-rich glycoprotein family | chr5:21808072-21808713 REVERSE LENGTH=213	2711.77	790.522	432.051	494.198	494.49	649.854	2874.75	476.43	432.355	481.584	497.611	706.606	-3.43035	-6.2765	-5.48721	-5.48397	-4.17289	-6.03394	-6.64905	-5.96936	-5.7771	-4.06839
Bra009235	AT5G06860.1	Symbols: PGIP1, ATPGIP1 | polygalacturonase inhibiting protein 1 | chr5:2132373-2133434 FORWARD LENGTH=330	5900.29	1797.81	1569.12	1460.29	1587.86	1419.7	5546.45	1994.64	1474.89	1589.43	1122.13	915.696	-3.28193	-3.76025	-4.04049	-3.71588	-4.15601	-2.78068	-3.76059	-3.48958	-4.94279	-6.05709
Bra033411	AT1G03590.1	Symbols: | Protein phosphatase 2C family protein | chr1:894480-896257 REVERSE LENGTH=462	2938.79	941.459	678.959	796.434	909.365	709.69	1800.42	765.21	411.989	447.016	690.489	498.886	-3.12153	-4.32838	-3.68994	-3.23169	-4.14095	-2.35284	-4.37007	-4.02764	-2.60746	-3.60888
Bra021637	AT2G30490.1	Symbols: ATC4H, C4H, CYP73A5, REF3 | cinnamate-4-hydroxylase | chr2:12993861-12995683 REVERSE LENGTH=505	4692.38	1610.03	1614.04	1406.38	1208.33	1134.86	4635.24	1735.44	1374.55	1633.51	926.025	719.485	-2.91447	-2.90723	-3.3365	-3.88336	-4.13477	-2.67093	-3.37219	-2.8376	-5.00552	-6.44244
Bra007735	AT3G63200.1	Symbols: PLP9, PLA IIIB | PATATIN-like protein 9 | chr3:23346140-23347379 FORWARD LENGTH=384	2047.29	483.2	316.016	562.58	325.146	496.377	3137.49	455.483	384.784	430.44	279.637	285.452	-4.23694	-6.47844	-3.63911	-6.29653	-4.12447	-6.88827	-8.1539	-7.28903	-11.2199	-10.9913
Bra038224	NA	NA	2810.02	795.303	658.481	709.886	939.674	681.803	2744.79	786.978	697.284	907.699	678.098	720.927	-3.53327	-4.26743	-3.95841	-2.99042	-4.12145	-3.48776	-3.9364	-3.0239	-4.04778	-3.80731
Bra009236	AT5G06860.1	Symbols: PGIP1, ATPGIP1 | polygalacturonase inhibiting protein 1 | chr5:2132373-2133434 FORWARD LENGTH=330	8268.14	2419.17	2365.32	2320.04	2191.56	2007.21	7751.65	2964.23	1763.01	1663.35	1155.45	1018.57	-3.41776	-3.49557	-3.56379	-3.77272	-4.11922	-2.61506	-4.39683	-4.66026	-6.70877	-7.61033
Bra010408	AT4G27310.1	Symbols: | B-box type zinc finger family protein | chr4:13675853-13676616 FORWARD LENGTH=223	5928.29	2195.24	1897.72	1833.91	2174.75	1440.78	5857.03	2864.54	1880.97	2310.42	2112.69	1823.96	-2.70052	-3.1239	-3.2326	-2.72596	-4.11464	-2.04467	-3.11383	-2.53505	-2.77231	-3.21116
Bra021358	AT3G03440.1	Symbols: | ARM repeat superfamily protein | chr3:815709-818568 FORWARD LENGTH=408	7029.9	1609.29	1724.67	1610.55	1970.59	1709.2	5860.18	2268.08	2575.01	2473.91	1983.53	2134.64	-4.36832	-4.07608	-4.36491	-3.56741	-4.11298	-2.58376	-2.27579	-2.36879	-2.95442	-2.74528
Bra027911	AT1G57620.1	Symbols: | emp24/gp25L/p24 family/GOLD family protein | chr1:21342863-21344581 FORWARD LENGTH=212	1802.82	484.441	478.923	565.634	487.378	438.717	1746.32	754.058	561.982	680.273	504.997	435.934	-3.72144	-3.76432	-3.18726	-3.69902	-4.1093	-2.3159	-3.10743	-2.56709	-3.45808	-4.00593
Bra023181	AT1G31350.1	Symbols: KUF1 | KAR-UP F-box 1 | chr1:11221519-11222706 REVERSE LENGTH=395	1595.52	373.591	426.465	437.32	492.302	388.604	1130.85	503.589	368.58	526.284	484.725	534.625	-4.27077	-3.74127	-3.6484	-3.24094	-4.10577	-2.24558	-3.06813	-2.14874	-2.33297	-2.11522
Bra012942	AT5G61570.2	Symbols: | Protein kinase superfamily protein | chr5:24758507-24760201 FORWARD LENGTH=358	1121.09	459.133	370.833	438.581	400.549	273.94	1017.35	483.464	449.509	396.775	260.126	347.967	-2.44175	-3.02317	-2.55618	-2.79888	-4.09247	-2.10429	-2.26325	-2.56405	-3.91099	-2.9237
Bra018988	AT1G52780.1	Symbols: | Protein of unknown function (DUF2921) | chr1:19658846-19662025 FORWARD LENGTH=1059	1626.92	620.018	601.69	591.513	551.632	401.882	2028.83	992.934	608.719	858.466	597.241	766.842	-2.62399	-2.70392	-2.75044	-2.94929	-4.04825	-2.04327	-3.33295	-2.36332	-3.397	-2.64569
Bra008765	AT5G14330.1	Symbols: | unknown protein; Has 8 Blast hits to 8 proteins in 2 species: Archae - 0; Bacteria - 0; Metazoa - 0; Fungi - 0; Plants - 8; Viruses - 0; Other Eukaryotes - 0 (source: NCBI BLink). | chr5:4619947-4620551 REVERSE LENGTH=128	2156.58	391.387	462.375	527.257	524.654	533.294	2568.6	803.165	537.95	573.885	593.014	474.145	-5.5101	-4.66414	-4.09019	-4.11048	-4.04389	-3.1981	-4.77479	-4.47581	-4.33143	-5.41733
Bra011237	AT4G30980.1	Symbols: LRL2 | LJRHL1-like 2 | chr4:15079489-15081606 REVERSE LENGTH=310	2699.51	711.179	519.394	626.767	700.888	673.024	2325.78	1048.99	779.338	767.493	749.039	1015.55	-3.79582	-5.19742	-4.30704	-3.85156	-4.01102	-2.21716	-2.9843	-3.03036	-3.10502	-2.29017
Bra019387	AT4G22290.1	Symbols: | Ubiquitin-specific protease family C19-related protein | chr4:11783199-11785730 REVERSE LENGTH=445	2070.05	698.57	550.85	553.825	462.01	516.311	3071.48	1053.11	786.721	1070.62	517.107	781.885	-2.96327	-3.75792	-3.73773	-4.48053	-4.00931	-2.91658	-3.90415	-2.86888	-5.93974	-3.9283
Bra004449	AT2G40940.1	Symbols: ERS1, ERS | ethylene response sensor 1 | chr2:17084635-17086819 REVERSE LENGTH=613	6344.42	987.413	915.858	1181.16	1355.42	1584.19	4730.79	1178.52	1255.9	1249.19	859.558	1547.33	-6.4253	-6.9273	-5.37135	-4.68078	-4.00484	-4.01418	-3.76685	-3.78709	-5.50375	-3.05739
Bra015293	AT1G04180.1	Symbols: YUC9 | YUCCA 9 | chr1:1104623-1105988 FORWARD LENGTH=421	1048.55	340.954	443.82	409.156	148.295	262.152	989.458	131.982	244.387	228.627	281.171	192.432	-3.07534	-2.36256	-2.56271	-7.0707	-3.99978	-7.49692	-4.04873	-4.32783	-3.51906	-5.14186
Bra027411	AT3G13620.1	Symbols: | Amino acid permease family protein | chr3:4450904-4452556 REVERSE LENGTH=478	6509.66	1848.46	1656.69	1726.42	2002.41	1627.55	3772.29	1421.45	922.276	1331.32	601.374	757.531	-3.52167	-3.92932	-3.77061	-3.25091	-3.99967	-2.65383	-4.0902	-2.8335	-6.27279	-4.97972
Bra004455	AT2G47470.1	Symbols: ATPDIL2-1, UNE5, MEE30, PDI11, ATPDI11 | thioredoxin family protein | chr2:19481503-19483683 FORWARD LENGTH=361	9074.44	3001.43	2838.34	2865.01	2191.98	2273.63	9191.35	3916.89	3927.52	3892.15	2742.01	3319	-3.02337	-3.19709	-3.16733	-4.13984	-3.99117	-2.34659	-2.34024	-2.36151	-3.35205	-2.76931
Bra015781	AT1G76160.1	Symbols: sks5 | SKU5 similar 5 | chr1:28578211-28581020 REVERSE LENGTH=541	11092	3088.9	2998.04	3573.16	3146.66	2785.19	8503.03	3250.65	2937.56	3350.89	2261.86	2013.77	-3.59092	-3.69975	-3.10426	-3.52501	-3.98249	-2.61579	-2.89459	-2.53754	-3.75931	-4.22244
Bra037954	AT1G54020.2	Symbols: | GDSL-like Lipase/Acylhydrolase superfamily protein | chr1:20161805-20163706 REVERSE LENGTH=372	2916.51	547.892	751.589	685.459	597.575	732.467	1704.7	308.821	239.85	193.57	97.4565	136.67	-5.32315	-3.88046	-4.25483	-4.88058	-3.98176	-5.52003	-7.10736	-8.80663	-17.4919	-12.4731
Bra005580	AT2G32280.1	Symbols: | Protein of unknown function (DUF1218) | chr2:13713210-13713977 FORWARD LENGTH=163	3136.24	437.06	586.183	727.441	595.099	788.019	1996.85	486.258	388.704	484.849	328.512	300.44	-7.17577	-5.35027	-4.31133	-5.27011	-3.9799	-4.10656	-5.1372	-4.1185	-6.07847	-6.64642
Bra039363	AT2G38150.1	Symbols: | alpha 1,4-glycosyltransferase family protein | chr2:15981700-15982917 REVERSE LENGTH=405	6367.22	1496.59	1350.81	1535.13	1547.89	1600.3	7360.03	1951.78	1547.39	2326.48	980.387	1328.18	-4.25449	-4.71363	-4.14767	-4.11348	-3.97877	-3.77093	-4.75642	-3.16359	-7.50727	-5.54144
Bra016891	AT2G42200.1	Symbols: SPL9, AtSPL9 | squamosa promoter binding protein-like 9 | chr2:17587601-17589451 FORWARD LENGTH=375	1459.63	538.34	307.026	307.886	632.544	367.388	874.277	373.478	397.193	381.781	148.478	196.02	-2.71135	-4.75409	-4.74081	-2.30755	-3.97299	-2.34091	-2.20114	-2.29	-5.88826	-4.46014
Bra033568	AT4G38540.1	Symbols: | FAD/NAD(P)-binding oxidoreductase family protein | chr4:18023187-18024827 FORWARD LENGTH=407	1828.48	472.434	802.307	775.755	589.304	460.699	985.543	474.108	430.064	467.617	408.509	442.44	-3.87034	-2.27903	-2.35703	-3.10278	-3.96893	-2.07873	-2.29162	-2.10759	-2.41254	-2.22752
Bra027827	AT1G59970.1	Symbols: | Matrixin family protein | chr1:22073601-22074683 FORWARD LENGTH=360	4208.87	1464.27	1308.31	1253.93	1111.54	1061.61	3940.96	1689.89	1014.56	1368.76	806.054	985.028	-2.87438	-3.21703	-3.35654	-3.78652	-3.96461	-2.33208	-3.8844	-2.87922	-4.8892	-4.00086
Bra014435	AT3G61460.1	Symbols: BRH1 | brassinosteroid-responsive RING-H2 | chr3:22741701-22742213 REVERSE LENGTH=170	6788.35	1760.84	1801.32	2131.35	2039.56	1713.57	4031.1	1653.95	1324.28	1566.94	1143.78	1501.3	-3.85518	-3.76854	-3.185	-3.32834	-3.96152	-2.43726	-3.04399	-2.57259	-3.52437	-2.68507
Bra025766	AT1G19770.1	Symbols: ATPUP14, PUP14 | purine permease 14 | chr1:6832426-6833702 FORWARD LENGTH=393	4589.03	2197.24	1797.41	1893.74	1647.93	1161.88	5814	1969.03	1538.09	2166.58	1899.18	1757.73	-2.08854	-2.55313	-2.42326	-2.78472	-3.94966	-2.95272	-3.78001	-2.68349	-3.06132	-3.30768
Bra026262	AT4G32480.1	Symbols: | Protein of unknown function (DUF506) | chr4:15676488-15677776 FORWARD LENGTH=287	7386.23	3288	3218.34	2363.87	1936.93	1883.07	8315.64	3722.76	2161.66	1966.53	1470.48	1029.88	-2.24642	-2.29504	-3.12463	-3.81337	-3.92244	-2.23373	-3.84688	-4.22859	-5.65505	-8.07438
Bra006927	AT3G52470.1	Symbols: | Late embryogenesis abundant (LEA) hydroxyproline-rich glycoprotein family | chr3:19450750-19451376 FORWARD LENGTH=208	1296.56	603.857	536.145	606.31	315.691	331.438	1179.4	455.229	316.299	317.833	242.321	210.451	-2.14713	-2.4183	-2.13844	-4.10705	-3.91192	-2.59078	-3.72875	-3.71075	-4.8671	-5.60415
Bra017478	AT5G47550.1	Symbols: | Cystatin/monellin superfamily protein | chr5:19286596-19286964 REVERSE LENGTH=122	2008.22	713.24	768.308	522.168	263.479	514.555	994.729	284.839	234.206	80.492	99.1405	261.13	-2.81563	-2.61382	-3.84593	-7.62194	-3.90283	-3.49225	-4.24724	-12.3581	-10.0335	-3.80932
Bra029104	AT5G52882.1	Symbols: | P-loop containing nucleoside triphosphate hydrolases superfamily protein | chr5:21434155-21438362 REVERSE LENGTH=829	2903.15	583.932	687.421	734.925	973.705	745.507	2177.17	712.97	766.912	773.606	563.718	559.698	-4.97173	-4.22325	-3.95027	-2.98155	-3.8942	-3.05366	-2.83888	-2.81431	-3.86216	-3.8899
Bra022205	AT3G17250.1	Symbols: | Protein phosphatase 2C family protein | chr3:5892875-5894426 REVERSE LENGTH=422	11428.3	2919.63	3201.99	3352.99	3218.52	2939.4	12910.1	5334.69	5637.59	6448.22	4225.72	5111.65	-3.9143	-3.56912	-3.40839	-3.55079	-3.88797	-2.42003	-2.29	-2.00212	-3.05512	-2.52562
Bra005143	AT2G38010.1	Symbols: | Neutral/alkaline non-lysosomal ceramidase | chr2:15906862-15909867 FORWARD LENGTH=757	2735.22	1159.96	1160.66	1240.26	1147.31	704.474	2600.05	1230.54	978.117	1076.34	1188.66	864.1	-2.35803	-2.35661	-2.20536	-2.38403	-3.88264	-2.11293	-2.65822	-2.41564	-2.18738	-3.00897
Bra018040	AT3G48720.1	Symbols: | HXXXD-type acyl-transferase family protein | chr3:18046527-18049295 FORWARD LENGTH=430	6428.39	2145.38	2100.57	2164.2	2007.2	1657.05	6038.27	2494.08	1561.42	1979.63	1071.11	1303.32	-2.99639	-3.06031	-2.97033	-3.20267	-3.87942	-2.42104	-3.86717	-3.0502	-5.63739	-4.63299
Bra027629	NA	NA	1560.02	317.136	392.479	292.141	410.09	403.247	2187.79	890.998	428.19	606.628	534.73	428.756	-4.91909	-3.97479	-5.33996	-3.80409	-3.86865	-2.45544	-5.10939	-3.60648	-4.09139	-5.10265
Bra029309	AT5G61780.1	Symbols: Tudor2, AtTudor2, TSN2 | TUDOR-SN protein 2 | chr5:24822012-24826641 FORWARD LENGTH=985	9342.65	2147.22	2810.58	2226.96	2990.09	2421.42	6273.04	1916.5	2124.16	1629.55	1873.49	1660.37	-4.35104	-3.3241	-4.19525	-3.12454	-3.85834	-3.27318	-2.95319	-3.84955	-3.34832	-3.7781
Bra004516	AT2G46680.1	Symbols: ATHB-7, ATHB7, HB-7 | homeobox 7 | chr2:19165777-19166773 REVERSE LENGTH=258	4796.37	1211.02	1039.78	1114.03	1704.79	1245.68	4674.14	1638.57	1394.75	1243.79	1319.66	1203.97	-3.9606	-4.61287	-4.30542	-2.81347	-3.8504	-2.85257	-3.35124	-3.75798	-3.54193	-3.88227
Bra027397	AT3G13790.2	Symbols: ATBFRUCT1 | Glycosyl hydrolases family 32 protein | chr3:4533084-4535831 REVERSE LENGTH=581	8237.62	1617.82	1290.7	1403.58	1733.01	2140.77	13627.9	2391.67	1618.94	1971.86	2289.3	2446.75	-5.0918	-6.38229	-5.86901	-4.75336	-3.84797	-5.69807	-8.41779	-6.91119	-5.95287	-5.5698
Bra003570	AT1G80510.1	Symbols: | Transmembrane amino acid transporter family protein | chr1:30273100-30274569 FORWARD LENGTH=489	1291.5	228.554	266.381	217.237	328.467	337.582	1997.84	533.533	345.406	476.392	307.36	352.273	-5.65074	-4.84832	-5.94512	-3.9319	-3.82574	-3.74455	-5.78403	-4.19369	-6.5	-5.67128
Bra025638	AT5G39865.1	Symbols: | Glutaredoxin family protein | chr5:15965560-15966732 REVERSE LENGTH=390	1732.52	395.59	492.23	507.712	559.503	455.8	1359.37	447.543	440.544	543.747	450.507	299.99	-4.37958	-3.51974	-3.41241	-3.09653	-3.80105	-3.03741	-3.08566	-2.5	-3.01742	-4.53138
Bra009393	AT5G09620.1	Symbols: | Octicosapeptide/Phox/Bem1p family protein | chr5:2983757-2985352 REVERSE LENGTH=531	18131.8	3746.97	4874.15	4206.28	5176.19	4801.88	6429.96	2401.98	1686.89	1822.29	1614.01	1612.67	-4.83906	-3.71999	-4.31065	-3.50292	-3.77598	-2.67694	-3.81172	-3.52851	-3.98384	-3.98715
Bra007844	AT2G24500.1	Symbols: FZF | Zinc finger protein 622 | chr2:10401259-10402805 REVERSE LENGTH=395	10565.2	3330.48	2796.23	2144.96	3150.6	2805.07	10287	4973.07	4139.32	3100.76	2757.63	2008.37	-3.17228	-3.77837	-4.92559	-3.35339	-3.76647	-2.06854	-2.48519	-3.31757	-3.73038	-5.12206
Bra006528	AT5G19980.1	Symbols: GONST4 | golgi nucleotide sugar transporter 4 | chr5:6749907-6750932 REVERSE LENGTH=341	3091.31	844.229	925.872	991.543	937.927	821.349	2905.82	1090.48	834.348	1186.94	711.896	1131.54	-3.6617	-3.33881	-3.11768	-3.2959	-3.7637	-2.66472	-3.48274	-2.44816	-4.0818	-2.56802
Bra039983	AT2G29470.1	Symbols: ATGSTU3, GST21, GSTU3 | glutathione S-transferase tau 3 | chr2:12628666-12629490 REVERSE LENGTH=225	1434.48	311.71	562.989	539.567	522.806	382.542	1033.51	382.33	315.221	244.4	349.428	396.258	-4.60197	-2.54797	-2.65858	-2.74381	-3.74986	-2.70319	-3.27868	-4.22876	-2.95772	-2.60817
Bra040478	AT2G46870.1	Symbols: NGA1 | AP2/B3-like transcriptional factor family protein | chr2:19261313-19262245 FORWARD LENGTH=310	588.7	280.572	211.749	213.571	178.535	157.886	718.745	278.491	334.807	287.374	253.465	302.895	-2.09821	-2.78018	-2.75646	-3.29739	-3.72864	-2.58086	-2.14674	-2.50108	-2.83568	-2.37292
Bra004320	AT1G68570.1	Symbols: | Major facilitator superfamily protein | chr1:25746811-25750110 FORWARD LENGTH=596	1695.17	493.468	306.793	411.108	491.525	455.924	1716.8	484.609	399.337	497.786	359.864	488.682	-3.43522	-5.52545	-4.12342	-3.4488	-3.7181	-3.54265	-4.29913	-3.44887	-4.77069	-3.51312
Bra020299	AT5G59680.1	Symbols: | Leucine-rich repeat protein kinase family protein | chr5:24046792-24050801 FORWARD LENGTH=887	907.24	355.726	373.339	374.712	391.307	244.526	506.226	185.111	170.712	158.699	144.966	200.065	-2.55039	-2.43007	-2.42117	-2.31849	-3.7102	-2.73472	-2.96538	-3.18985	-3.49203	-2.53031
Bra015375	AT1G04980.1	Symbols: ATPDIL2-2, ATPDI10, PDI10, PDIL2-2 | PDI-like 2-2 | chr1:1413869-1416120 REVERSE LENGTH=447	1978.32	619.349	481.645	549.359	448.554	535.459	2455.29	828.761	543.896	515.284	420.766	620.617	-3.19419	-4.10742	-3.60114	-4.41044	-3.69462	-2.9626	-4.51426	-4.76493	-5.83529	-3.95621
Bra034583	AT4G33790.1	Symbols: CER4, G7, FAR3 | Jojoba acyl CoA reductase-related male sterility protein | chr4:16204325-16207891 REVERSE LENGTH=493	8035.23	2375.21	2777.68	2385.76	2197.39	2190.7	5324.13	2386.79	1734.72	1641.3	1300.93	1483.51	-3.38296	-2.89278	-3.368	-3.65672	-3.66788	-2.23067	-3.06916	-3.24385	-4.09256	-3.58887
Bra001971	AT2G16250.1	Symbols: | Leucine-rich repeat protein kinase family protein | chr2:7039682-7042933 REVERSE LENGTH=915	4319.05	1366.04	1177.8	1400.96	1878.69	1179.97	3124.65	1236.37	1364.9	1311.74	1107.82	1061.48	-3.16173	-3.66705	-3.08292	-2.29897	-3.6603	-2.52728	-2.28929	-2.38207	-2.82054	-2.94367
Bra000015	AT2G37710.1	Symbols: RLK | receptor lectin kinase | chr2:15814934-15816961 REVERSE LENGTH=675	6622.69	1743.51	1923.54	1907.76	1684.78	1810.44	3930.34	1387.66	817.609	1335.17	1215.29	1144.25	-3.79848	-3.44297	-3.47145	-3.93089	-3.65806	-2.83235	-4.80711	-2.9437	-3.23408	-3.43486
Bra004227	AT1G67480.1	Symbols: | Galactose oxidase/kelch repeat superfamily protein | chr1:25277294-25278529 FORWARD LENGTH=376	1303.12	511.694	534.06	486.974	255.969	359.105	1469.63	703.997	505.414	502.745	431.449	424.388	-2.54668	-2.44003	-2.67595	-5.09093	-3.6288	-2.08755	-2.90777	-2.92321	-3.40627	-3.46294
Bra009691	AT5G23530.1	Symbols: AtCXE18, CXE18 | carboxyesterase 18 | chr5:7933366-7934373 REVERSE LENGTH=335	2269.66	664.608	620.488	755.306	1104.94	625.461	1839.39	792.385	566.618	569.036	381.974	394.145	-3.41504	-3.65786	-3.00495	-2.0541	-3.62878	-2.32133	-3.24626	-3.23247	-4.81548	-4.66679
Bra023395	AT5G13180.1	Symbols: ANAC083, VNI2, NAC083 | NAC domain containing protein 83 | chr5:4196643-4197577 FORWARD LENGTH=252	3305.4	1059.03	1115.35	1017.91	993.088	913.908	3426.93	1355.48	1122.48	1181.63	976.922	865.098	-3.12116	-2.96355	-3.24724	-3.32841	-3.61678	-2.5282	-3.053	-2.90017	-3.50788	-3.96132
Bra033709	AT5G43980.1	Symbols: PDLP1, PDLP1A | plasmodesmata-located protein 1 | chr5:17694817-17696458 REVERSE LENGTH=303	1234.38	172.787	197.275	192.406	305.886	341.781	1749.66	287.951	344.917	272.848	284.202	360.999	-7.14394	-6.25715	-6.4155	-4.03542	-3.61161	-6.07624	-5.0727	-6.41258	-6.1564	-4.84672
Bra010324	AT4G29520.1	Symbols: | LOCATED IN: endoplasmic reticulum, plasma membrane; EXPRESSED IN: 23 plant structures; EXPRESSED DURING: 14 growth stages; CONTAINS InterPro DOMAIN/s: Saposin B (InterPro:IPR008139); Has 137 Blast hits to 137 proteins in 50 species: Archae - 2; Bacteria - 0; Metazoa - 41; Fungi - 10; Plants - 36; Viruses - 0; Other Eukaryotes - 48 (source: NCBI BLink). | chr4:14494056-14495657 REVERSE …	1788.81	659.299	887.836	792.941	330.553	496.183	2091.91	877.006	882.201	957.534	514.398	670.859	-2.7132	-2.0148	-2.25592	-5.41157	-3.60514	-2.38529	-2.37124	-2.18468	-4.06671	-3.11826
Bra003942	AT1G70780.1	Symbols: | unknown protein; FUNCTIONS IN: molecular_function unknown; INVOLVED IN: biological_process unknown; LOCATED IN: mitochondrion; EXPRESSED IN: sperm cell, male gametophyte, pollen tube; EXPRESSED DURING: L mature pollen stage, M germinated pollen stage; BEST Arabidopsis thaliana protein match is: unknown protein (TAIR:AT1G23150.1); Has 143 Blast hits to 143 proteins in 17 species: Archae…	6260.65	1233.81	2131.9	1523.23	2401.06	1736.62	7930.41	3268.22	3001.17	3149.78	2502.38	2722.3	-5.07424	-2.93665	-4.11011	-2.60745	-3.60508	-2.42652	-2.64244	-2.51777	-3.16915	-2.91313
Bra013607	AT4G22290.1	Symbols: | Ubiquitin-specific protease family C19-related protein | chr4:11783199-11785730 REVERSE LENGTH=445	1704.3	537.516	463.705	490.211	379.95	474.898	2213.44	769.799	600.991	653.765	459.963	594.738	-3.1707	-3.6754	-3.47667	-4.48559	-3.58877	-2.87535	-3.68298	-3.38568	-4.81221	-3.72171
Bra003476	AT3G61820.1	Symbols: | Eukaryotic aspartyl protease family protein | chr3:22880074-22881525 REVERSE LENGTH=483	3113.23	851.572	710.155	863.025	583.489	871.437	1203.64	573.868	390.365	479.342	272.951	381.141	-3.65586	-4.38387	-3.60735	-5.33554	-3.57252	-2.09742	-3.08337	-2.51103	-4.40973	-3.15799
Bra032621	AT1G01120.1	Symbols: KCS1 | 3-ketoacyl-CoA synthase 1 | chr1:57392-58978 REVERSE LENGTH=528	4446.63	960.929	1245.68	1168.01	1193.31	1246.37	4867.43	1584.15	942.823	1251.42	973.978	1660.8	-4.62743	-3.56964	-3.80701	-3.7263	-3.56766	-3.07258	-5.16261	-3.88953	-4.99747	-2.93077
Bra004810	AT2G44160.1	Symbols: MTHFR2 | methylenetetrahydrofolate reductase 2 | chr2:18262301-18265185 FORWARD LENGTH=594	4351.53	1337.33	1364.8	1597.13	1535.74	1224.2	953.709	240.625	211.666	255.646	241.794	95.2247	-3.25389	-3.1884	-2.72459	-2.83351	-3.55459	-3.96347	-4.50573	-3.73058	-3.9443	-10.0154
Bra001796	AT3G20600.1	Symbols: NDR1 | Late embryogenesis abundant (LEA) hydroxyproline-rich glycoprotein family | chr3:7194877-7195536 FORWARD LENGTH=219	3120.5	1540.9	1247.38	1213.2	1049.16	878.098	3255.27	1582.6	795.9	1246.24	650.684	838.432	-2.02512	-2.50164	-2.57212	-2.97428	-3.5537	-2.05691	-4.09005	-2.61207	-5.00284	-3.88257
Bra009237	AT5G06860.1	Symbols: PGIP1, ATPGIP1 | polygalacturonase inhibiting protein 1 | chr5:2132373-2133434 FORWARD LENGTH=330	7517.87	1979.34	2002.41	2105.69	2004.4	2117.92	6806.88	2440.13	1353.45	1852.2	854.646	884.438	-3.79817	-3.75441	-3.57026	-3.75068	-3.54965	-2.78956	-5.02928	-3.67502	-7.96456	-7.69628
Bra007226	AT3G56200.1	Symbols: | Transmembrane amino acid transporter family protein | chr3:20850087-20851779 FORWARD LENGTH=435	2767.78	967.97	1066.69	925.331	1140.23	779.946	2901.8	969.898	1004.17	1428.59	876.269	802.556	-2.85937	-2.59474	-2.99112	-2.42739	-3.54868	-2.99186	-2.88975	-2.03123	-3.31154	-3.6157
Bra004188	AT1G66760.1	Symbols: | MATE efflux family protein | chr1:24902110-24904054 FORWARD LENGTH=466	2136.73	881.988	609.109	665.117	660.584	604.892	3466.92	1719.06	1066.9	1400.53	1143.78	1274.31	-2.42263	-3.50796	-3.21256	-3.23461	-3.53242	-2.01675	-3.24953	-2.47543	-3.03111	-2.72063
Bra032434	AT1G06150.1	Symbols: EMB1444 | basic helix-loop-helix (bHLH) DNA-binding superfamily protein | chr1:1867129-1873194 REVERSE LENGTH=1322	1616.12	598.637	401.631	532.33	542.531	458.341	1415.2	655.383	599.549	594.27	481.977	636.074	-2.69967	-4.02389	-3.03594	-2.97885	-3.52602	-2.15935	-2.36044	-2.38141	-2.93624	-2.2249
Bra037702	AT2G43550.1	Symbols: | Scorpion toxin-like knottin superfamily protein | chr2:18073263-18073651 FORWARD LENGTH=103	6227.26	2512.52	1579.36	2061.22	1422.4	1766.85	5901.29	1997.56	2019.58	2154.21	1272.23	1137.74	-2.47849	-3.9429	-3.02115	-4.37799	-3.5245	-2.95425	-2.92204	-2.73942	-4.63854	-5.18685
Bra040013	AT1G33260.1	Symbols: | Protein kinase superfamily protein | chr1:12064796-12066114 FORWARD LENGTH=349	530.437	175.665	171.36	194.619	169.109	150.915	533.819	236.83	235.081	259.572	152.73	130.917	-3.01959	-3.09545	-2.72551	-3.13666	-3.51481	-2.25402	-2.27079	-2.05654	-3.49518	-4.07754
Bra024558	AT1G23010.1	Symbols: LPR1 | Cupredoxin superfamily protein | chr1:8147353-8149580 FORWARD LENGTH=581	2272.11	811.08	637.128	845.491	654.568	649.293	1263.7	569.914	505.955	483.795	316.182	314.116	-2.80134	-3.56618	-2.68733	-3.47116	-3.49936	-2.21735	-2.49765	-2.61206	-3.99675	-4.02304
Bra008099	AT1G73500.1	Symbols: ATMKK9, MKK9 | MAP kinase kinase 9 | chr1:27639419-27640351 REVERSE LENGTH=310	6576.46	2529	3199.25	2455.25	2860.95	1888.14	4722.75	2148.65	1899.62	1951.12	1311.62	853.694	-2.60042	-2.05563	-2.67853	-2.2987	-3.48304	-2.19801	-2.48616	-2.42053	-3.6007	-5.53213
Bra002478	AT5G60460.1	Symbols: | Preprotein translocase Sec, Sec61-beta subunit protein | chr5:24317590-24317919 REVERSE LENGTH=109	1225.94	316.377	293.062	268.118	264.006	354.449	1761.7	457.969	225.417	355.497	135.721	447.083	-3.87493	-4.18321	-4.57239	-4.64361	-3.45872	-3.84677	-7.81529	-4.9556	-12.9803	-3.94043
Bra032269	AT1G48920.1	Symbols: ATNUC-L1, PARL1, NUC-L1 | nucleolin like 1 | chr1:18098186-18101422 FORWARD LENGTH=557	811.895	174.764	235.044	228.904	156.189	235.621	686.609	189.558	307.034	340.635	215.625	299.986	-4.64567	-3.45423	-3.54688	-5.19816	-3.44577	-3.62216	-2.23626	-2.01567	-3.18427	-2.2888
Bra015599	AT1G47840.1	Symbols: HXK3 | hexokinase 3 | chr1:17616243-17618859 REVERSE LENGTH=493	2532.38	597.017	808.182	866.466	887.765	736.275	1580.04	629.462	696.361	596.41	417.489	659.327	-4.24172	-3.13343	-2.92265	-2.85253	-3.43945	-2.51014	-2.269	-2.64925	-3.78463	-2.39644
Bra021736	AT2G31360.1	Symbols: ADS2, DS2 | 16:0delta9 desaturase 2 | chr2:13372121-13373546 REVERSE LENGTH=307	6235.59	1999.68	1394.63	1676.08	1371.38	1822.25	5657.23	2126.2	1923.61	2035.34	1527.42	1523.32	-3.11829	-4.47114	-3.72034	-4.54695	-3.42192	-2.66072	-2.94094	-2.7795	-3.70378	-3.71375
Bra012765	AT4G15770.1	Symbols: | RNA binding | chr4:8978060-8978623 FORWARD LENGTH=187	7600.52	2141.27	1898.32	2139.36	2417.52	2223.62	5919.84	2320.45	2467.66	2939.22	2306.86	2618.17	-3.54954	-4.00381	-3.55271	-3.14393	-3.41808	-2.55116	-2.39897	-2.01409	-2.56619	-2.26106
Bra039006	AT2G19590.1	Symbols: ACO1, ATACO1 | ACC oxidase 1 | chr2:8476239-8477354 REVERSE LENGTH=310	2470.05	235.109	357.832	310.862	442.033	723.21	1515.03	156.814	171.876	226.237	152.721	220.501	-10.506	-6.90282	-7.94581	-5.58793	-3.4154	-9.66132	-8.81467	-6.69665	-9.92025	-6.87085
Bra030785	AT1G09560.1	Symbols: GLP5 | germin-like protein 5 | chr1:3093896-3094639 FORWARD LENGTH=219	4053.19	1756.47	1618.85	1710.69	1311.79	1187.27	6020.65	2556.59	1869.49	2940.12	2514.06	2954.95	-2.30758	-2.50375	-2.36933	-3.08982	-3.41387	-2.35495	-3.22048	-2.04776	-2.39479	-2.03748
Bra005390	AT2G34810.1	Symbols: | FAD-binding Berberine family protein | chr2:14685292-14686914 FORWARD LENGTH=540	6233.45	2914.29	2732.11	2382.32	2482.55	1829.3	6278.3	2581.65	1750.25	2143.1	1272.11	1139.32	-2.13893	-2.28155	-2.61655	-2.51091	-3.40756	-2.43189	-3.58709	-2.92954	-4.93534	-5.51057
Bra024709	AT1G26560.1	Symbols: BGLU40 | beta glucosidase 40 | chr1:9178513-9181726 FORWARD LENGTH=510	1353.15	387.9	417.044	421.037	448.079	400.787	1314.44	447.421	348.662	633.609	294.829	394.767	-3.4884	-3.24462	-3.21385	-3.01989	-3.37623	-2.93781	-3.76995	-2.07453	-4.45831	-3.32966
Bra017085	AT2G39210.1	Symbols: | Major facilitator superfamily protein | chr2:16366287-16368231 REVERSE LENGTH=601	16577.1	5301.08	5220.07	5134.1	6064.81	4925.66	12272.7	5311.35	4837.69	4263.97	4940.57	4523.28	-3.12712	-3.17565	-3.22882	-2.73333	-3.36546	-2.31066	-2.53689	-2.87823	-2.48407	-2.71323
Bra012283	NA	NA	521.858	178.817	154.526	158.211	234.414	155.516	570.534	199.91	218.138	234.098	186.323	109.969	-2.91839	-3.37715	-3.29849	-2.22622	-3.35565	-2.85395	-2.61547	-2.43716	-3.06207	-5.18813
Bra028478	AT5G40890.1	Symbols: ATCLC-A, CLC-A, CLCA, ATCLCA | chloride channel A | chr5:16381645-16384999 REVERSE LENGTH=775	1354.94	603.877	446.876	554.239	374.544	404.034	2148.16	1015.65	328.418	295.423	216.502	123.987	-2.24374	-3.03203	-2.44469	-3.61757	-3.35353	-2.11506	-6.54093	-7.27147	-9.92213	-17.3257
Bra011249	AT4G31140.1	Symbols: | O-Glycosyl hydrolases family 17 protein | chr4:15141581-15143188 FORWARD LENGTH=484	5206.38	2126.97	1611.35	1746.77	1688.88	1554.14	6043.61	2688.24	1867.73	1747.66	1431.28	1436.89	-2.44779	-3.23107	-2.98058	-3.08274	-3.35001	-2.24817	-3.2358	-3.45812	-4.22252	-4.20604
Bra035001	AT3G44220.1	Symbols: | Late embryogenesis abundant (LEA) hydroxyproline-rich glycoprotein family | chr3:15928216-15929645 FORWARD LENGTH=206	3623.05	952.289	1059.35	996.504	975.627	1082.94	2288.14	1143.98	775.51	670.294	789.61	809.005	-3.80457	-3.42007	-3.63576	-3.71356	-3.34557	-2.00016	-2.9505	-3.41364	-2.89781	-2.82834
Bra024700	AT1G26650.1	Symbols: | unknown protein; BEST Arabidopsis thaliana protein match is: unknown protein (TAIR:AT1G69430.1); Has 205 Blast hits to 204 proteins in 17 species: Archae - 0; Bacteria - 0; Metazoa - 0; Fungi - 0; Plants - 205; Viruses - 0; Other Eukaryotes - 0 (source: NCBI BLink). | chr1:9210335-9211342 FORWARD LENGTH=335	3323.46	958.904	863.585	1067.61	805.821	993.862	3519.37	1433	1104.04	1170.27	766.942	1045.63	-3.46589	-3.84845	-3.11299	-4.12432	-3.34399	-2.45595	-3.18772	-3.00731	-4.58883	-3.36579
Bra018950	AT1G52160.1	Symbols: TRZ3 | tRNAse Z3 | chr1:19420911-19424419 REVERSE LENGTH=890	1130.68	301.561	374.349	332.973	446.221	339.245	1035.51	438.691	506.419	428.592	313.803	434.715	-3.74942	-3.02039	-3.39571	-2.5339	-3.33293	-2.36045	-2.04477	-2.41607	-3.29987	-2.38204
Bra025627	AT5G39990.1	Symbols: | Core-2/I-branching beta-1,6-N-acetylglucosaminyltransferase family protein | chr5:16004494-16006428 FORWARD LENGTH=447	9221.57	2969.47	3163.22	3136.5	3723.16	2769.81	8300.6	3962.8	4110.33	3695.03	3955	4127.59	-3.10546	-2.91525	-2.94008	-2.47681	-3.32932	-2.09463	-2.01945	-2.24642	-2.09876	-2.011
Bra033666	AT5G43170.1	Symbols: AZF3, ZF3 | zinc-finger protein 3 | chr5:17331050-17331631 REVERSE LENGTH=193	12827.6	2805.63	2780.71	2492.16	3905.03	3875.83	12472.4	2514.33	3311.9	3097.9	2328.18	2121.84	-4.57209	-4.61307	-5.14718	-3.28489	-3.30964	-4.96053	-3.76593	-4.02608	-5.35715	-5.87811
Bra017296	AT2G35760.1	Symbols: | Uncharacterised protein family (UPF0497) | chr2:15032059-15033094 FORWARD LENGTH=201	13214.6	4553.36	4559.77	4239.03	4102.36	4009.16	11573.7	5522.74	3900.33	4655.68	3377.5	3655.92	-2.90216	-2.89808	-3.11736	-3.22122	-3.2961	-2.09564	-2.96736	-2.48593	-3.42671	-3.16574
Bra026499	AT5G23400.1	Symbols: | Leucine-rich repeat (LRR) family protein | chr5:7880603-7882372 FORWARD LENGTH=589	907.687	264.339	325.561	269.305	178.369	276.943	1373.76	303.09	162.095	427.168	415.145	293.97	-3.4338	-2.78807	-3.37048	-5.08882	-3.27752	-4.53252	-8.47503	-3.21597	-3.30911	-4.67313
Bra014991	AT3G23880.1	Symbols: | F-box and associated interaction domains-containing protein | chr3:8622061-8623155 REVERSE LENGTH=364	13247.8	3316.46	3987.65	3486.03	4036.22	4061.24	11114.8	4328.54	3363.26	3561.27	2640.11	2513.81	-3.99456	-3.32221	-3.80025	-3.28223	-3.26201	-2.56779	-3.30477	-3.12102	-4.20998	-4.4215
Bra039837	AT2G15320.1	Symbols: | Leucine-rich repeat (LRR) family protein | chr2:6666527-6667675 REVERSE LENGTH=382	5349.69	2599.35	2125.39	1911.75	1811.89	1648.09	4919.65	2004.47	1770.9	1814.98	1494.93	1366.83	-2.05809	-2.51704	-2.79832	-2.95255	-3.24599	-2.45434	-2.77805	-2.71058	-3.29089	-3.59931
Bra012992	AT5G60960.1	Symbols: | Pentatricopeptide repeat (PPR) superfamily protein | chr5:24528423-24529988 REVERSE LENGTH=521	3383.55	852.794	964.941	1061.51	1169.23	1046.72	3600.01	1328.37	1466.74	1216.61	1013.25	1313.76	-3.96761	-3.50648	-3.18749	-2.89383	-3.23253	-2.7101	-2.45443	-2.95905	-3.55293	-2.74023
Bra030202	AT2G22795.1	Symbols: | unknown protein; BEST Arabidopsis thaliana protein match is: unknown protein (TAIR:AT4G37820.1); Has 799854 Blast hits to 188815 proteins in 4452 species: Archae - 4529; Bacteria - 144236; Metazoa - 287749; Fungi - 87083; Plants - 43826; Viruses - 3662; Other Eukaryotes - 228769 (source: NCBI BLink). | chr2:9697380-9699584 REVERSE LENGTH=734	2068	686.186	535.181	671.905	721.958	640.377	2321.99	1084.45	1025.29	1026.39	778.563	813.909	-3.01376	-3.86411	-3.07782	-2.86443	-3.22935	-2.14117	-2.26472	-2.26229	-2.9824	-2.85289
Bra003906	AT1G71880.1	Symbols: SUC1, ATSUC1 | sucrose-proton symporter 1 | chr1:27054334-27056100 FORWARD LENGTH=513	5917.71	1885.5	1965.11	2054.22	1649.45	1832.82	6193.7	2780.71	2361.74	2995.36	1814.82	1980.14	-3.13854	-3.01139	-2.88076	-3.58769	-3.22875	-2.22738	-2.62252	-2.06776	-3.41285	-3.12791
Bra031275	AT3G21330.1	Symbols: | basic helix-loop-helix (bHLH) DNA-binding superfamily protein | chr3:7507720-7508841 FORWARD LENGTH=373	2638.51	409.932	471.756	604.516	611.765	818.654	2377.16	765.494	557.768	287.97	392.221	312.979	-6.43646	-5.59295	-4.36467	-4.31295	-3.22299	-3.10539	-4.26192	-8.25489	-6.06077	-7.59527
Bra008241	AT1G76160.1	Symbols: sks5 | SKU5 similar 5 | chr1:28578211-28581020 REVERSE LENGTH=541	7235.7	2035.02	2207.06	2588.76	2347.61	2248.98	6697.48	2207.65	2142.49	2133.58	1509.73	1319.02	-3.55559	-3.27843	-2.79504	-3.08216	-3.21733	-3.03376	-3.12603	-3.13908	-4.43621	-5.07762
Bra000840	AT4G03210.1	Symbols: XTH9 | xyloglucan endotransglucosylase/hydrolase 9 | chr4:1416019-1417197 FORWARD LENGTH=290	6344.89	3067.34	2145.13	1969.78	1547.51	1975.11	5514.16	2263.41	2641	2558.91	2253.53	1674.02	-2.06853	-2.95781	-3.22112	-4.10006	-3.21242	-2.43622	-2.08791	-2.15489	-2.4469	-3.29396
Bra011907	AT1G55265.1	Symbols: | Protein of unknown function, DUF538 | chr1:20617326-20617853 FORWARD LENGTH=175	772.72	214.23	159.312	183.442	265.152	240.579	1515.47	530.804	214.969	333.054	213.683	228.22	-3.60696	-4.85036	-4.21234	-2.91425	-3.21192	-2.85505	-7.04971	-4.55022	-7.09214	-6.64039
Bra013672	AT4G23060.1	Symbols: IQD22 | IQ-domain 22 | chr4:12087283-12090408 FORWARD LENGTH=484	780.063	257.338	284.659	292.183	221.509	244.019	1376.25	661.247	630.763	594.471	658.618	615.465	-3.03128	-2.74034	-2.66978	-3.52159	-3.19673	-2.08129	-2.18188	-2.31508	-2.0896	-2.23611
Bra026311	AT4G27730.1	Symbols: ATOPT6, OPT6 | oligopeptide transporter 1 | chr4:13834024-13836468 REVERSE LENGTH=736	3771.38	1271.45	1259.68	1301.66	1139.24	1188.59	4415.64	1598.64	992.915	1254.09	996.267	1012.36	-2.9662	-2.99392	-2.89736	-3.31044	-3.17299	-2.76212	-4.44715	-3.52099	-4.43219	-4.36173
Bra021887	AT5G03490.1	Symbols: | UDP-Glycosyltransferase superfamily protein | chr5:871550-872947 FORWARD LENGTH=465	1646.56	661.128	586.293	529.089	590.414	521.609	1119.7	432.713	380.47	375.497	432.328	525.683	-2.49053	-2.80843	-3.11207	-2.78882	-3.15669	-2.58763	-2.94294	-2.98191	-2.58993	-2.12999
Bra014903	AT1G31130.1	Symbols: | unknown protein; FUNCTIONS IN: molecular_function unknown; INVOLVED IN: biological_process unknown; LOCATED IN: cellular_component unknown; EXPRESSED IN: 23 plant structures; EXPRESSED DURING: 13 growth stages; BEST Arabidopsis thaliana protein match is: unknown protein (TAIR:AT4G19950.1); Has 246 Blast hits to 244 proteins in 29 species: Archae - 2; Bacteria - 16; Metazoa - 0; Fungi -…	2673.86	1286.2	1082.35	1051.06	1133.81	848.02	3357.29	1466.68	1260.78	1355.89	1274.8	1294.01	-2.07888	-2.47042	-2.54397	-2.3583	-3.15306	-2.28904	-2.66287	-2.47608	-2.63358	-2.59449
Bra033680	AT5G43420.1	Symbols: | RING/U-box superfamily protein | chr5:17451790-17452917 FORWARD LENGTH=375	7249.98	1646.87	1601.17	2236.4	1864.05	2318.12	8056.06	3490.23	2331.25	2685.92	1694.75	2002.41	-4.40228	-4.52793	-3.24181	-3.88937	-3.12753	-2.30817	-3.45568	-2.99937	-4.75354	-4.02318
Bra007639	AT3G61900.1	Symbols: | SAUR-like auxin-responsive protein family | chr3:22925813-22926379 FORWARD LENGTH=136	701.175	110.792	87.6472	145.305	148.154	225.318	717.444	130.455	152.813	158.84	196.627	168.627	-6.32875	-7.99997	-4.82554	-4.73274	-3.11194	-5.49955	-4.69491	-4.51677	-3.64876	-4.25462
Bra015376	AT1G04990.1	Symbols: | Zinc finger C-x8-C-x5-C-x3-H type family protein | chr1:1419368-1421454 REVERSE LENGTH=404	4019.44	961.442	848.868	1277.05	1006.54	1302.24	2658.58	1321.9	1094.69	1123.43	938.247	1107.91	-4.18064	-4.73506	-3.14744	-3.99332	-3.08656	-2.01118	-2.42861	-2.36648	-2.83356	-2.39964
Bra016075	AT1G72290.1	Symbols: | Kunitz family trypsin and protease inhibitor protein | chr1:27215852-27216499 FORWARD LENGTH=215	2819.81	433.23	751.424	700.712	721.631	916.762	1606.88	84.6445	104.287	90.2616	104.587	133.343	-6.50881	-3.75262	-4.02421	-3.90755	-3.07584	-18.9839	-15.4082	-17.8025	-15.3641	-12.0507
Bra029525	AT5G14940.1	Symbols: | Major facilitator superfamily protein | chr5:4831748-4834312 REVERSE LENGTH=552	4305.07	1386.79	1240.61	1408.23	1714.33	1401.7	4040.27	970.989	1244.51	1177.74	1029.39	1240.48	-3.10434	-3.47012	-3.05708	-2.51123	-3.07132	-4.16098	-3.24647	-3.43053	-3.92492	-3.25702
Bra003879	AT1G72470.1	Symbols: ATEXO70D1, EXO70D1 | exocyst subunit exo70 family protein D1 | chr1:27283759-27285660 FORWARD LENGTH=633	3724.58	1149.9	1313.39	1221.44	1418.66	1215.91	2952.15	1191.04	1084.17	907.039	897.502	656.42	-3.23905	-2.83585	-3.04934	-2.62542	-3.0632	-2.47863	-2.72296	-3.25471	-3.2893	-4.49735
Bra037002	AT4G33565.1	Symbols: | RING/U-box superfamily protein | chr4:16136821-16137924 FORWARD LENGTH=367	4336.46	1789.97	1272.17	1452.16	1751.46	1419.92	2503.8	1085.99	715.978	869.737	829.775	588.071	-2.42264	-3.40871	-2.98621	-2.47591	-3.05402	-2.30555	-3.49703	-2.8788	-3.01744	-4.25765
Bra009700	AT5G23660.1	Symbols: MTN3, SWEET12, AtSWEET12 | homolog of Medicago truncatula MTN3 | chr5:7971936-7973796 REVERSE LENGTH=285	14783	7383.79	6242.14	4978.16	4987.15	4848.95	16217.3	6034.06	7031.98	5689.24	6249.92	6008.87	-2.00209	-2.36826	-2.96957	-2.96422	-3.0487	-2.68763	-2.30622	-2.85052	-2.5948	-2.69889
Bra004286	AT1G68160.1	Symbols: | Protein of unknown function (DUF3755) | chr1:25546168-25548625 REVERSE LENGTH=273	3418.9	1322.72	1285.29	1308.79	1234.9	1121.47	2690.56	1109.86	1032.14	1008.16	972.523	1048.73	-2.58475	-2.66002	-2.61226	-2.76856	-3.04859	-2.42423	-2.60678	-2.66878	-2.76658	-2.56554
Bra006043	AT5G10020.1	Symbols: | Leucine-rich receptor-like protein kinase family protein | chr5:3133514-3136949 FORWARD LENGTH=1048	1041.53	477.258	439.977	402.424	420.542	342.746	1328.68	349.015	413.964	393.768	267.782	374.069	-2.18232	-2.36724	-2.58814	-2.47664	-3.03878	-3.80694	-3.20965	-3.37427	-4.9618	-3.55197
Bra006297	AT5G15350.1	Symbols: ENODL17, AtENODL17 | early nodulin-like protein 17 | chr5:4985184-4986154 REVERSE LENGTH=172	5253.7	1504.69	1289.34	1660.8	1585.39	1734.64	3097.61	933.035	754.284	866.709	607.321	802.129	-3.49155	-4.07472	-3.16336	-3.31382	-3.0287	-3.31993	-4.10669	-3.57399	-5.10045	-3.86174
Bra036447	AT3G03640.1	Symbols: GLUC, BGLU25 | beta glucosidase 25 | chr3:881028-884028 FORWARD LENGTH=531	5608.48	2655.02	2499.23	1882.05	2054.65	1855.12	5606.3	2189.87	1859.8	2149.45	1933.26	1884.04	-2.11241	-2.24408	-2.97998	-2.72965	-3.02324	-2.56011	-3.01446	-2.60825	-2.89992	-2.97568
Bra030503	AT1G02520.1	Symbols: PGP11 | P-glycoprotein 11 | chr1:524134-528745 FORWARD LENGTH=1278	677.308	243.637	303.299	295.562	284.949	224.035	626.924	309.025	217.999	221.118	226.053	232.154	-2.77999	-2.23314	-2.29159	-2.37694	-3.02322	-2.02872	-2.87581	-2.83525	-2.77335	-2.70047
Bra020234	AT5G60710.1	Symbols: | Zinc finger (C3HC4-type RING finger) family protein | chr5:24410953-24414849 REVERSE LENGTH=704	7428.73	2406.66	2257.2	2630.31	2807.67	2463.53	6834.74	2747.62	1821.44	2339.46	1736.9	2128.24	-3.08674	-3.29113	-2.82428	-2.64587	-3.01548	-2.48751	-3.75238	-2.9215	-3.93502	-3.21145
Bra039397	NA	NA	9227.35	2681.47	3283.4	2978.73	3222.36	3068.78	7711.87	2846.59	2207.92	2038.03	1894.03	1235.24	-3.44115	-2.8103	-3.09775	-2.86354	-3.00685	-2.70916	-3.49282	-3.78398	-4.07167	-6.24322
Bra013470	AT4G20780.1	Symbols: CML42 | calmodulin like 42 | chr4:11133309-11133884 REVERSE LENGTH=191	13375.8	3582.68	5719.56	4992.28	6037.22	4451.78	16317.6	6100.63	7360.73	5246.37	4570.47	2651.67	-3.73346	-2.33861	-2.6793	-2.21556	-3.0046	-2.67474	-2.21685	-3.11026	-3.57022	-6.15371
Bra033811	NA	NA	545.866	119.241	98.8823	144.721	139.027	182.276	514.891	173.471	67.2303	91.6423	98.5237	142.822	-4.57784	-5.52036	-3.77185	-3.92633	-2.99472	-2.96817	-7.65862	-5.61849	-5.22606	-3.60512
Bra022699	NA	NA	3376.27	675.49	1063.34	921.892	1250.6	1128.79	2658.22	500.606	640.377	550.673	492.02	541.345	-4.99825	-3.17516	-3.66233	-2.69972	-2.99105	-5.31	-4.15102	-4.82722	-5.40267	-4.9104
Bra039935	AT2G22795.1	Symbols: | unknown protein; BEST Arabidopsis thaliana protein match is: unknown protein (TAIR:AT4G37820.1); Has 799854 Blast hits to 188815 proteins in 4452 species: Archae - 4529; Bacteria - 144236; Metazoa - 287749; Fungi - 87083; Plants - 43826; Viruses - 3662; Other Eukaryotes - 228769 (source: NCBI BLink). | chr2:9697380-9699584 REVERSE LENGTH=734	5961.05	2004.75	1751.88	2004.16	1684.45	2001.26	6067.62	2311.24	1773.26	1265.48	1222.4	1106.22	-2.97346	-3.40266	-2.97434	-3.53887	-2.97865	-2.62527	-3.42173	-4.79472	-4.96369	-5.485
Bra006450	AT5G18280.1	Symbols: ATAPY2, APY2 | apyrase 2 | chr5:6050799-6054875 REVERSE LENGTH=578	12311.4	4793.05	4790.66	5039.94	4517.02	4164.93	11668.5	5478.41	5685.47	5193.78	4008.82	3851.47	-2.56859	-2.56988	-2.44277	-2.72556	-2.95597	-2.12991	-2.05234	-2.24663	-2.91071	-3.02962
Bra000240	AT2G41770.1	Symbols: | Protein of unknown function (DUF288) | chr2:17424549-17427042 REVERSE LENGTH=771	7797.91	3060.04	3056.36	3210.16	2958.21	2643.68	6703.35	2945.16	2552.27	2912.33	1706.33	2104.86	-2.5483	-2.55137	-2.42913	-2.63602	-2.94964	-2.27606	-2.62643	-2.30171	-3.92852	-3.1847
Bra022141	AT5G47550.1	Symbols: | Cystatin/monellin superfamily protein | chr5:19286596-19286964 REVERSE LENGTH=122	1503.82	255.044	304.284	344.107	345.117	510.25	1156.47	350.116	290.72	268.439	311.423	353.787	-5.89632	-4.94216	-4.37021	-4.35742	-2.94722	-3.30311	-3.97795	-4.30813	-3.7135	-3.26883
Bra028697	AT5G07440.1	Symbols: GDH2 | glutamate dehydrogenase 2 | chr5:2356153-2358012 FORWARD LENGTH=411	10012.8	3782.44	3317.09	3288.51	2845.34	3402.49	9472.9	3572.98	2439.7	2340.93	2589.58	2379.54	-2.64718	-3.01855	-3.04478	-3.51902	-2.94279	-2.65126	-3.88281	-4.04664	-3.65808	-3.98098
Bra025806	AT1G20300.1	Symbols: | Pentatricopeptide repeat (PPR) superfamily protein | chr1:7029701-7031314 FORWARD LENGTH=537	5378.76	1662.39	1560.54	1867.61	1854.51	1836.36	5195.45	1982.27	1843.56	2263.87	1415.33	1677.71	-3.23556	-3.44673	-2.88002	-2.90037	-2.92903	-2.62096	-2.81816	-2.29494	-3.67084	-3.09675
Bra027687	NA	NA	1541.69	355.423	513.572	391.499	490.588	527.155	1556.28	538.616	546.994	494.201	512.734	593.944	-4.33762	-3.0019	-3.93792	-3.14254	-2.92455	-2.88941	-2.84515	-3.14908	-3.03526	-2.62025
Bra004314	AT1G68500.1	Symbols: | unknown protein; BEST Arabidopsis thaliana protein match is: unknown protein (TAIR:AT1G25422.1); Has 16 Blast hits to 16 proteins in 6 species: Archae - 0; Bacteria - 0; Metazoa - 0; Fungi - 0; Plants - 16; Viruses - 0; Other Eukaryotes - 0 (source: NCBI BLink). | chr1:25702041-25702322 FORWARD LENGTH=93	10586.8	3147.96	3821.56	3693.6	4704.15	3627.28	10410.1	4417.24	3645.64	4160.03	2058.79	2313.59	-3.36307	-2.77028	-2.86626	-2.25052	-2.91866	-2.3567	-2.85549	-2.50241	-5.05642	-4.49954
Bra038495	AT4G16650.1	Symbols: | O-fucosyltransferase family protein | chr4:9372727-9375910 FORWARD LENGTH=549	5810.51	2323.63	1783.57	2266.69	2179.16	2006.05	4932.94	2398.58	1865.75	1631.66	1201.8	1214.7	-2.50062	-3.2578	-2.56343	-2.6664	-2.89649	-2.05661	-2.64394	-3.02326	-4.10463	-4.06104
Bra021508	AT3G13790.2	Symbols: ATBFRUCT1 | Glycosyl hydrolases family 32 protein | chr3:4533084-4535831 REVERSE LENGTH=581	3085.14	507.96	665.557	532.057	990.84	1070.45	4680.98	1480.51	866.933	1065.43	1173.31	1493.98	-6.07359	-4.63543	-5.79851	-3.11366	-2.8821	-3.16173	-5.39947	-4.39351	-3.98955	-3.13323
Bra035731	AT5G51180.1	Symbols: | alpha/beta-Hydrolases superfamily protein | chr5:20797360-20799929 FORWARD LENGTH=357	15069.1	4703.59	4997.07	5145.79	5908.17	5232.31	14688.4	6530.76	4964.37	4436.97	4018.03	3813.38	-3.20374	-3.01559	-2.92843	-2.55055	-2.88001	-2.24911	-2.95876	-3.31046	-3.65562	-3.85181
Bra002191	AT5G18860.1	Symbols: | inosine-uridine preferring nucleoside hydrolase family protein | chr5:6291023-6295581 FORWARD LENGTH=890	13239.3	4474.16	6205.35	5710.98	6501.64	4600.01	11271.3	5184.12	4993.99	4706.75	2224.03	1738.08	-2.95906	-2.13353	-2.31822	-2.0363	-2.8781	-2.1742	-2.25697	-2.39471	-5.06796	-6.48491
Bra028716	AT5G06810.1	Symbols: | Mitochondrial transcription termination factor family protein | chr5:2108493-2112256 FORWARD LENGTH=1141	696.483	251.742	290.913	298.241	318.756	242.829	777.581	291.97	322.09	338.417	225.011	285.599	-2.76665	-2.39413	-2.3353	-2.185	-2.8682	-2.66322	-2.41417	-2.2977	-3.45575	-2.72263
Bra000950	AT4G01220.1	Symbols: | Nucleotide-diphospho-sugar transferase family protein | chr4:513431-515648 REVERSE LENGTH=360	5869.26	2820.1	1856.72	2241.98	1820.06	2053.59	2522.76	601.801	504.063	588.387	294.044	375.258	-2.08122	-3.16109	-2.61789	-3.22476	-2.85805	-4.19202	-5.00485	-4.28759	-8.57953	-6.72273
Bra024109	AT4G30080.1	Symbols: ARF16 | auxin response factor 16 | chr4:14703369-14705564 REVERSE LENGTH=670	2864.33	944.164	830.599	855.26	869.976	1002.74	2862.93	836.359	610.081	726.09	384.525	478.59	-3.03372	-3.44851	-3.34908	-3.29242	-2.8565	-3.42309	-4.6927	-3.94294	-7.44537	-5.98201
Bra005059	AT2G39210.1	Symbols: | Major facilitator superfamily protein | chr2:16366287-16368231 REVERSE LENGTH=601	6342.43	2848.52	2667.14	2695.24	2301.48	2226.4	3636.99	1785.84	1792.29	1810.33	1200.93	1354.76	-2.22657	-2.37799	-2.3532	-2.7558	-2.84874	-2.03657	-2.02924	-2.00902	-3.02848	-2.6846
Bra001542	AT3G14240.1	Symbols: | Subtilase family protein | chr3:4741637-4743964 REVERSE LENGTH=775	1651.91	591.086	450.9	547.794	515.805	579.974	2055.87	394.956	337.275	457.312	206.516	200.025	-2.7947	-3.66358	-3.01557	-3.20259	-2.84825	-5.20531	-6.09553	-4.49555	-9.95502	-10.2781
Bra036401	NA	NA	2258.12	723.934	683.89	706.138	566.102	793.09	1557.73	327.711	247.904	333.517	267.266	271.042	-3.11923	-3.30188	-3.19785	-3.98889	-2.84724	-4.75337	-6.2836	-4.67062	-5.82839	-5.74719
Bra028183	AT5G38460.1	Symbols: | ALG6, ALG8 glycosyltransferase family | chr5:15398592-15400987 REVERSE LENGTH=533	596.885	296.979	203.4	282.693	237.882	210.239	869.069	371.34	307.337	249.733	243.724	274.626	-2.00986	-2.93454	-2.11142	-2.50916	-2.83908	-2.34036	-2.82774	-3.47999	-3.56579	-3.16455
Bra040428	AT3G63200.1	Symbols: PLP9, PLA IIIB | PATATIN-like protein 9 | chr3:23346140-23347379 FORWARD LENGTH=384	927.075	327.535	295.395	392.331	214.359	326.682	1514.98	370.859	261.812	311.185	167.785	193.825	-2.83046	-3.13842	-2.36299	-4.32487	-2.83785	-4.08506	-5.78652	-4.86842	-9.02929	-7.81623
Bra013939	AT4G25990.1	Symbols: CIL | CCT motif family protein | chr4:13191937-13193543 REVERSE LENGTH=394	1004.5	223.182	316.885	316.997	356.896	354.211	779.257	256.036	234.417	345.525	171.692	210.904	-4.50081	-3.16992	-3.1688	-2.81455	-2.83588	-3.04354	-3.32423	-2.25528	-4.53869	-3.69484
Bra010209	AT1G33610.1	Symbols: | Leucine-rich repeat (LRR) family protein | chr1:12188910-12190346 FORWARD LENGTH=478	1376.25	542.747	554.062	490.542	471.609	485.775	1637.13	683.099	633.312	744.868	511.46	500.831	-2.53571	-2.48393	-2.80557	-2.9182	-2.8331	-2.39662	-2.58503	-2.19788	-3.2009	-3.26883
Bra002314	AT5G20600.1	Symbols: | FUNCTIONS IN: molecular_function unknown; INVOLVED IN: rRNA processing; LOCATED IN: preribosome, small subunit precursor; EXPRESSED IN: 22 plant structures; EXPRESSED DURING: 13 growth stages; CONTAINS InterPro DOMAIN/s: Nucleolar, Nop52 (InterPro:IPR010301); Has 543 Blast hits to 530 proteins in 201 species: Archae - 0; Bacteria - 10; Metazoa - 211; Fungi - 164; Plants - 46; Viruses -…	910.998	331.351	319.802	363.423	412.897	321.704	1254.8	411.881	500.554	456.432	420.794	530.505	-2.74934	-2.84863	-2.50672	-2.20636	-2.83179	-3.04651	-2.50682	-2.74915	-2.98198	-2.36529
Bra002747	AT5G57220.1	Symbols: CYP81F2 | cytochrome P450, family 81, subfamily F, polypeptide 2 | chr5:23187911-23189681 FORWARD LENGTH=491	545.191	53.8521	60.344	37.5203	151.46	193.816	654.404	124.299	98.3855	179.648	200.378	289.155	-10.1239	-9.03472	-14.5306	-3.59957	-2.81293	-5.26476	-6.65143	-3.6427	-3.26585	-2.26316
Bra034990	AT5G22070.1	Symbols: | Core-2/I-branching beta-1,6-N-acetylglucosaminyltransferase family protein | chr5:7308255-7309343 FORWARD LENGTH=362	2416.16	846.341	457.179	708.112	544.321	859.813	4933.91	1260.33	947.963	1246.91	732.172	878.414	-2.85483	-5.28493	-3.41212	-4.43885	-2.8101	-3.91478	-5.20475	-3.95691	-6.73873	-5.61684
Bra033265	AT1G01430.1	Symbols: TBL25 | TRICHOME BIREFRINGENCE-LIKE 25 | chr1:156953-158536 REVERSE LENGTH=456	2712.51	1247.47	720.422	923.25	987.931	966.522	2513.42	1084.09	928.411	871.284	588.458	625.378	-2.17441	-3.76517	-2.938	-2.74565	-2.80646	-2.31846	-2.70723	-2.88473	-4.2712	-4.01904
Bra011507	AT4G34215.1	Symbols: | Domain of unknown function (DUF303) | chr4:16380203-16381192 REVERSE LENGTH=260	3176.8	997.694	1221.69	1083.15	1578.7	1133.53	3403.59	1572.96	1486.51	1489.99	1588.45	1575.34	-3.18414	-2.60033	-2.93293	-2.01229	-2.80257	-2.16381	-2.28965	-2.2843	-2.14271	-2.16054
Bra032466	AT1G05360.1	Symbols: | BEST Arabidopsis thaliana protein match is: SNARE associated Golgi protein family (TAIR:AT4G14950.1); Has 332 Blast hits to 326 proteins in 115 species: Archae - 0; Bacteria - 11; Metazoa - 174; Fungi - 0; Plants - 74; Viruses - 0; Other Eukaryotes - 73 (source: NCBI BLink). | chr1:1564816-1567278 FORWARD LENGTH=416	1664.57	806.294	563.072	614.167	442.572	594.144	1733.35	801.165	576.33	793.138	561.288	666.476	-2.06447	-2.95623	-2.71029	-3.76113	-2.80163	-2.16354	-3.00757	-2.18543	-3.08817	-2.60077
Bra031851	AT5G65660.1	Symbols: | hydroxyproline-rich glycoprotein family protein | chr5:26245444-26246245 REVERSE LENGTH=136	6551.69	2069.36	1728.56	2245.1	1717.48	2340.46	7926.31	2723	1804.77	2157.94	1675.44	1657.15	-3.16605	-3.79026	-2.91822	-3.81471	-2.79932	-2.91087	-4.39187	-3.67309	-4.73088	-4.7831
Bra030066	AT1G27930.1	Symbols: | Protein of unknown function (DUF579) | chr1:9731510-9732379 REVERSE LENGTH=289	7672.25	2762.56	2563.84	2814.49	2147.29	2750.91	8895.12	2898.03	2046.44	2418.41	2059.37	2602.53	-2.77722	-2.99248	-2.72598	-3.57299	-2.78899	-3.06937	-4.34663	-3.67809	-4.31934	-3.41787
Bra010528	AT4G35630.1	Symbols: PSAT | phosphoserine aminotransferase | chr4:16904205-16905497 FORWARD LENGTH=430	3806.27	1271.72	1477.77	1279.22	1330.34	1368.94	4113.38	1333.74	1498.58	2043.14	1311.91	1497.86	-2.99301	-2.57568	-2.97546	-2.86113	-2.78045	-3.08409	-2.74485	-2.01326	-3.13541	-2.74617
Bra021897	AT2G34180.1	Symbols: CIPK13, SnRK3.7, WL2, ATWL2 | CBL-interacting protein kinase 13 | chr2:14430761-14432269 REVERSE LENGTH=502	2145.98	551.203	537.303	609.154	634.651	774.666	4932.91	715.767	378.396	682.312	399.006	489.368	-3.89327	-3.99398	-3.52289	-3.38135	-2.7702	-6.89178	-13.0364	-7.2297	-12.363	-10.0802
Bra001701	NA	NA	7886.37	2695.17	2192.52	2835.91	2618.63	2849.96	3764.76	1299.79	1156.03	1303.45	1107.91	1173.03	-2.92611	-3.59694	-2.7809	-3.01164	-2.76719	-2.89644	-3.25663	-2.8883	-3.39807	-3.20943
Bra032349	AT1G29980.1	Symbols: | Protein of unknown function, DUF642 | chr1:10503411-10505994 REVERSE LENGTH=407	1238.85	510.277	473.789	440.498	500.348	448.099	2694.32	1332.87	1021.81	1073.68	897.468	867.929	-2.4278	-2.61477	-2.81239	-2.47598	-2.76468	-2.02144	-2.63681	-2.50943	-3.00213	-3.10431
Bra010389	AT4G27950.1	Symbols: CRF4 | cytokinin response factor 4 | chr4:13909732-13910739 REVERSE LENGTH=335	4586.94	1502.53	1623.8	1548.85	1721.4	1661.32	3815.4	1742.89	1748.87	1832.61	1198.74	1686.49	-3.05281	-2.82482	-2.96151	-2.66466	-2.76102	-2.18912	-2.18164	-2.08195	-3.18284	-2.26233
Bra032749	AT4G13930.1	Symbols: SHM4 | serine hydroxymethyltransferase 4 | chr4:8048013-8050021 REVERSE LENGTH=471	18442.4	5318.12	5825.48	6066.34	7079.22	6683.06	17099.1	5459.34	6098.97	5453.68	3844.55	3728.71	-3.46784	-3.16582	-3.04012	-2.60515	-2.75957	-3.13208	-2.8036	-3.13533	-4.44762	-4.5858
Bra010804	AT1G30000.1	Symbols: MNS3 | alpha-mannosidase 3 | chr1:10509532-10512320 REVERSE LENGTH=624	2168.68	897.718	1043.82	805.056	988.636	790.883	2962.53	1470.29	1042.89	1349.8	1043.66	1133.67	-2.41577	-2.07764	-2.69383	-2.19361	-2.7421	-2.01493	-2.84069	-2.19479	-2.8386	-2.61322
Bra011162	AT4G30080.1	Symbols: ARF16 | auxin response factor 16 | chr4:14703369-14705564 REVERSE LENGTH=670	2237.18	921.26	920.619	860.434	843.861	819.564	1938.67	881.711	672.493	813.109	570.456	705.516	-2.42839	-2.43008	-2.60006	-2.65112	-2.72972	-2.19876	-2.88281	-2.38427	-3.39846	-2.74788
Bra026610	AT2G02220.1	Symbols: ATPSKR1, PSKR1 | phytosulfokin receptor 1 | chr2:584098-587124 REVERSE LENGTH=1008	968.543	264.887	285.52	295.5	213.729	355.285	673.878	264.658	156.629	156.025	209.888	279.991	-3.65644	-3.39221	-3.27764	-4.53164	-2.7261	-2.54622	-4.30238	-4.31904	-3.21066	-2.40678
Bra030769	AT1G09330.1	Symbols: | unknown protein; FUNCTIONS IN: molecular_function unknown; INVOLVED IN: biological_process unknown; LOCATED IN: integral to membrane; EXPRESSED IN: 24 plant structures; EXPRESSED DURING: 15 growth stages; CONTAINS InterPro DOMAIN/s: Protein of unknown function DUF846, eukaryotic (InterPro:IPR008564); Has 518 Blast hits to 518 proteins in 206 species: Archae - 0; Bacteria - 0; Metazoa -…	5765.44	2282.59	2279.04	2190.38	2178.06	2122.95	7184.71	3014.06	2639.9	2857.89	2604.16	2993.48	-2.52583	-2.52977	-2.63216	-2.64705	-2.71577	-2.38373	-2.72158	-2.51399	-2.75894	-2.40012
Bra022430	AT3G19540.1	Symbols: | Protein of unknown function (DUF620) | chr3:6780762-6782633 FORWARD LENGTH=485	16506.7	6444.91	6294.99	6151	6195.69	6079.15	13572.9	6167.15	5837.28	6088.03	5220.48	4998.07	-2.5612	-2.6222	-2.68358	-2.66422	-2.7153	-2.20084	-2.32521	-2.22944	-2.59993	-2.71563
Bra034535	AT4G32800.1	Symbols: | Integrase-type DNA-binding superfamily protein | chr4:15819812-15820477 FORWARD LENGTH=221	823.404	254.853	194.154	372.459	282.993	304.674	1178.51	391.71	302.269	344.369	355.996	303.126	-3.2309	-4.24098	-2.21072	-2.90963	-2.70257	-3.00863	-3.89888	-3.42223	-3.31046	-3.88786
Bra022308	AT3G18280.1	Symbols: | Bifunctional inhibitor/lipid-transfer protein/seed storage 2S albumin superfamily protein | chr3:6267102-6267392 FORWARD LENGTH=96	3617.15	1647.83	1248.81	1366.89	798.499	1339.98	3413.91	1166.14	992.155	837.38	807.506	925.869	-2.1951	-2.89648	-2.64626	-4.52994	-2.69941	-2.92753	-3.4409	-4.07689	-4.22772	-3.68725
Bra007213	AT3G56060.1	Symbols: | Glucose-methanol-choline (GMC) oxidoreductase family protein | chr3:20803328-20805983 REVERSE LENGTH=577	2273.84	599.09	615.269	667.31	779.273	842.866	2297.89	780.099	926.681	931.844	863.164	744.441	-3.79549	-3.69568	-3.40747	-2.9179	-2.69775	-2.94564	-2.4797	-2.46596	-2.66217	-3.08673
Bra026261	AT4G28365.1	Symbols: ENODL3, AtENODL3 | early nodulin-like protein 3 | chr4:14033012-14033688 REVERSE LENGTH=199	1905.86	532.739	540.92	590.284	921.008	709.587	1584.67	530.198	520.154	661.33	295.432	393.979	-3.57747	-3.52337	-3.22872	-2.06932	-2.68587	-2.98883	-3.04654	-2.39619	-5.36391	-4.02222
Bra003205	AT3G55030.1	Symbols: PGPS2 | phosphatidylglycerolphosphate synthase 2 | chr3:20396860-20398224 FORWARD LENGTH=233	1883.2	729.962	625.146	627.025	897.469	705.124	903.035	324.359	439.09	336.22	222.173	426.431	-2.57986	-3.01242	-3.00339	-2.09835	-2.67074	-2.78406	-2.05661	-2.68585	-4.06456	-2.11766
Bra003938	AT1G70940.1	Symbols: PIN3, ATPIN3 | Auxin efflux carrier family protein | chr1:26743170-26745871 FORWARD LENGTH=640	7813.19	3032.24	2850.32	3259.62	2916.46	2927.29	8375.39	2886.53	1969.57	1983.4	1682.74	1758.59	-2.57671	-2.74116	-2.39696	-2.679	-2.66909	-2.90154	-4.2524	-4.22274	-4.97723	-4.76256
Bra009722	AT5G24010.1	Symbols: | Protein kinase superfamily protein | chr5:8113910-8116384 FORWARD LENGTH=824	5922.06	2155.94	2277.09	2108.2	2343.68	2224.19	5653.06	1909.47	1682.18	2182.31	2124.64	1892.15	-2.74686	-2.60071	-2.80906	-2.52682	-2.66257	-2.96054	-3.36056	-2.5904	-2.66071	-2.98764
Bra019771	AT1G12500.1	Symbols: | Nucleotide-sugar transporter family protein | chr1:4263542-4264957 REVERSE LENGTH=361	4008.31	1281.4	1302.69	1549.16	1296.55	1512.84	4076.95	1423.91	982.091	1152.24	882.5	1019.11	-3.12807	-3.07695	-2.58741	-3.09152	-2.64953	-2.86321	-4.1513	-3.53828	-4.61977	-4.0005
Bra017713	AT4G35480.1	Symbols: RHA3B | RING-H2 finger A3B | chr4:16852233-16852835 REVERSE LENGTH=200	2615.56	1299.11	931.543	1124.01	835.359	987.514	1890.04	754.084	660.693	712.343	783.729	779.976	-2.01335	-2.80777	-2.32699	-3.13106	-2.64863	-2.50641	-2.86069	-2.65327	-2.4116	-2.4232
Bra034408	AT1G35620.1	Symbols: ATPDIL5-2, ATPDI8, PDI8, PDIL5-2 | PDI-like 5-2 | chr1:13156504-13158280 FORWARD LENGTH=440	4865.25	2096.43	1856.13	1990.41	2014.8	1840.83	6307.37	2722.4	2150.61	2281.75	1701.56	2247.31	-2.32073	-2.62118	-2.44435	-2.41476	-2.64297	-2.31684	-2.93283	-2.76427	-3.70682	-2.80663
Bra002744	AT5G57250.1	Symbols: | Pentatricopeptide repeat (PPR) superfamily protein | chr5:23195609-23198524 REVERSE LENGTH=971	3095.25	1380.66	1369.34	1473.68	1254.77	1174.92	3463.39	1315.21	1299.61	1510.88	968.488	1119.31	-2.24186	-2.2604	-2.10035	-2.46679	-2.63443	-2.63334	-2.66495	-2.2923	-3.57608	-3.09422
Bra007054	AT3G54200.1	Symbols: | Late embryogenesis abundant (LEA) hydroxyproline-rich glycoprotein family | chr3:20065731-20066438 FORWARD LENGTH=235	967.089	294.542	253.441	397.418	298.323	367.719	1973.47	769.453	504.209	764.604	683.648	964.217	-3.28337	-3.81583	-2.43343	-3.24175	-2.62997	-2.56477	-3.91399	-2.58104	-2.88668	-2.04671
Bra009298	AT5G07030.1	Symbols: | Eukaryotic aspartyl protease family protein | chr5:2183600-2185717 REVERSE LENGTH=455	4482.14	1364.59	991.546	1642.74	1137.15	1707.68	1359.38	259.561	330.347	357.71	287.603	329.721	-3.28461	-4.52036	-2.72845	-3.94156	-2.6247	-5.23723	-4.11501	-3.80023	-4.72658	-4.12282
Bra015478	AT1G06160.1	Symbols: ORA59 | octadecanoid-responsive Arabidopsis AP2/ERF 59 | chr1:1883046-1883780 FORWARD LENGTH=244	592.893	142.339	195.323	175.264	172.414	226.557	660.433	293.998	215.359	232.886	163.606	165.119	-4.16536	-3.03545	-3.38286	-3.43878	-2.61697	-2.24639	-3.06666	-2.83586	-4.03673	-3.99974
Bra000602	AT5G49945.1	Symbols: | Protein of unknown function (DUF1682) | chr5:20317418-20319432 FORWARD LENGTH=480	2725.71	1157.87	1059.63	1228.47	1061.35	1041.96	3967.73	1750.32	1366.66	1302.68	1123.24	1189.38	-2.35407	-2.57232	-2.21878	-2.56815	-2.61594	-2.26686	-2.90323	-3.04582	-3.5324	-3.33596
Bra004674	AT2G42200.1	Symbols: SPL9, AtSPL9 | squamosa promoter binding protein-like 9 | chr2:17587601-17589451 FORWARD LENGTH=375	943.507	228.469	219.135	187.451	201.58	362.011	802.923	338.552	237.261	174.193	209.361	236.947	-4.12969	-4.3056	-5.03335	-4.68056	-2.60629	-2.37164	-3.38413	-4.60939	-3.83511	-3.38862
Bra032854	AT1G27930.1	Symbols: | Protein of unknown function (DUF579) | chr1:9731510-9732379 REVERSE LENGTH=289	5757.99	2121.02	2116.07	1893.29	1632.25	2216.68	6505.56	1747.82	1522	1964.9	1654.3	1808.84	-2.71473	-2.72108	-3.04126	-3.52764	-2.59757	-3.7221	-4.27435	-3.31089	-3.93252	-3.59654
Bra030905	AT1G54115.1	Symbols: ATCCX4, CCX4 | cation calcium exchanger 4 | chr1:20202118-20204052 FORWARD LENGTH=644	1788.85	659.719	613.484	610.582	540.39	688.998	2030.96	950.751	667.002	821.509	575.948	795.211	-2.71153	-2.91589	-2.92975	-3.31029	-2.59631	-2.13616	-3.04491	-2.47223	-3.52629	-2.55399
Bra026618	AT2G02060.1	Symbols: | Homeodomain-like superfamily protein | chr2:495691-497609 FORWARD LENGTH=256	707.964	247.756	182.276	276.099	251.288	273.449	1011.43	286.853	226.117	207.176	175.202	166.066	-2.8575	-3.88402	-2.56417	-2.81734	-2.58902	-3.52595	-4.47304	-4.88198	-5.77294	-6.09053
Bra002661	AT5G58320.2	Symbols: | Kinase interacting (KIP1-like) family protein | chr5:23577728-23579641 FORWARD LENGTH=558	7767.48	2729.59	3185.6	3469.23	3609.94	3005.62	5869.55	2775.85	2127.68	2826.62	1920.59	1835.41	-2.84566	-2.43831	-2.23896	-2.15169	-2.58432	-2.11451	-2.75866	-2.07653	-3.05612	-3.19795
Bra004382	AT1G69460.1	Symbols: | emp24/gp25L/p24 family/GOLD family protein | chr1:26112054-26113160 REVERSE LENGTH=214	8271.68	3927.67	3106.79	3407.12	2921.91	3204.04	8007.83	3558.14	2214.58	3401.24	2272.52	2426.42	-2.106	-2.66245	-2.42776	-2.83092	-2.58164	-2.25057	-3.61596	-2.35439	-3.52377	-3.30027
Bra011411	AT4G33080.1	Symbols: | AGC (cAMP-dependent, cGMP-dependent and protein kinase C) kinase family protein | chr4:15960146-15964296 FORWARD LENGTH=519	2606.13	1271.36	1064.22	1173.06	1124.29	1010.48	2258.44	1050.08	954.683	1012.59	942.297	998.116	-2.04988	-2.44886	-2.22165	-2.31802	-2.5791	-2.15073	-2.36564	-2.23036	-2.39674	-2.2627
Bra023063	AT2G48010.1	Symbols: RKF3 | receptor-like kinase in in flowers 3 | chr2:19641465-19643318 FORWARD LENGTH=617	4490.53	1298.03	1227.22	1461.47	1747.66	1748.04	2544.95	1084.9	1062.27	1217.15	993.411	1255.22	-3.4595	-3.65911	-3.07261	-2.56945	-2.56889	-2.34579	-2.39577	-2.09091	-2.56183	-2.02749
Bra002112	AT5G17860.1	Symbols: CAX7 | calcium exchanger 7 | chr5:5902638-5904350 REVERSE LENGTH=570	6193.25	2244.74	2435.41	2444.84	2710.93	2421.72	9121.18	3335.85	2196.81	3034.44	1321.64	1512.38	-2.75901	-2.543	-2.53319	-2.28455	-2.55738	-2.73429	-4.15201	-3.00589	-6.90141	-6.03101
Bra021349	AT3G43720.1	Symbols: | Bifunctional inhibitor/lipid-transfer protein/seed storage 2S albumin superfamily protein | chr3:15615549-15617099 REVERSE LENGTH=193	2513.33	671.469	604.777	865.777	528.109	985.892	1550.14	544.611	210.128	396.205	140.36	433.211	-3.74303	-4.1558	-2.90298	-4.75911	-2.5493	-2.84633	-7.37712	-3.91247	-11.044	-3.57826
Bra011880	AT4G39030.1	Symbols: EDS5, SID1 | MATE efflux family protein | chr4:18185740-18188898 FORWARD LENGTH=543	2364.05	613.248	952.02	896.456	1100.97	929.552	1702.67	633.816	795.776	757.385	754.029	738.711	-3.85497	-2.48319	-2.63711	-2.14724	-2.54321	-2.68638	-2.13963	-2.24809	-2.2581	-2.30492
Bra021614	AT5G67360.1	Symbols: ARA12 | Subtilase family protein | chr5:26872192-26874465 REVERSE LENGTH=757	4691.1	2280.93	2115.8	1919.72	1933.1	1844.84	6367.7	2406.79	1578.46	1753.49	867.461	1502.19	-2.05666	-2.21718	-2.44364	-2.42672	-2.54282	-2.64572	-4.03412	-3.63144	-7.34062	-4.23894
Bra036575	AT5G26340.1	Symbols: MSS1, STP13, ATSTP13 | Major facilitator superfamily protein | chr5:9243851-9246994 REVERSE LENGTH=526	10075.2	2091.24	2110.49	3063.84	3520.56	3991.72	4724.94	673.497	544.4	596.612	542.303	526.589	-4.81781	-4.77387	-3.28842	-2.86182	-2.52402	-7.01553	-8.67917	-7.91962	-8.71273	-8.97273
Bra028859	AT5G02890.1	Symbols: | HXXXD-type acyl-transferase family protein | chr5:670207-671454 REVERSE LENGTH=353	1514.94	475.658	477.923	539.388	566.441	600.302	2414.99	628.56	639.337	598.323	486.123	772.971	-3.18494	-3.16984	-2.80863	-2.67449	-2.52363	-3.8421	-3.77733	-4.03626	-4.96786	-3.1243
Bra023681	NA	NA	18962.4	8928.77	7145.33	8685.99	8473.5	7536.66	19617.4	9524.33	7750.26	9142.62	7286.59	8418.44	-2.12374	-2.65382	-2.1831	-2.23785	-2.51602	-2.05971	-2.53119	-2.14571	-2.69226	-2.33029
Bra004738	AT2G43040.1	Symbols: NPG1 | tetratricopeptide repeat (TPR)-containing protein | chr2:17896049-17898524 REVERSE LENGTH=704	1061.84	347.673	412.914	477.672	397.97	423.243	1260.81	601.547	475.049	411.349	337.405	393.007	-3.05413	-2.57158	-2.22295	-2.66814	-2.50882	-2.09595	-2.65406	-3.06506	-3.73679	-3.20811
Bra027473	AT5G43190.1	Symbols: | Galactose oxidase/kelch repeat superfamily protein | chr5:17340300-17341511 REVERSE LENGTH=403	4544.49	1489.41	1962.38	1807.54	2180.92	1840.56	3561.74	1726.42	1432.3	1436.56	1014.36	1447.03	-3.0512	-2.31581	-2.51419	-2.08375	-2.46908	-2.06308	-2.48673	-2.47935	-3.51132	-2.46141
Bra027985	AT5G42420.1	Symbols: | Nucleotide-sugar transporter family protein | chr5:16968819-16970225 FORWARD LENGTH=350	1536.87	640.437	557.036	631.747	456.07	623.596	1805.53	826.299	516.858	655.396	554.167	677.528	-2.39972	-2.75901	-2.43273	-3.36981	-2.46453	-2.18508	-3.49328	-2.75487	-3.2581	-2.66488
Bra037041	AT4G32800.1	Symbols: | Integrase-type DNA-binding superfamily protein | chr4:15819812-15820477 FORWARD LENGTH=221	503.198	180.811	143.693	186.376	223.544	204.843	912.838	224.677	230.202	231.835	208.814	166.833	-2.78301	-3.5019	-2.69991	-2.251	-2.45651	-4.06289	-3.96538	-3.93745	-4.37154	-5.47157
Bra027907	AT1G57750.1	Symbols: MAH1, CYP96A15 | cytochrome P450, family 96, subfamily A, polypeptide 15 | chr1:21384186-21385679 REVERSE LENGTH=497	502.247	135.102	174.552	134.518	99.2594	206.57	597.47	271.321	249.987	196.668	203.477	241.475	-3.71754	-2.87735	-3.73368	-5.05994	-2.43136	-2.20208	-2.39	-3.03796	-2.9363	-2.47425
Bra002021	AT2G17120.1	Symbols: LYM2 | lysm domain GPI-anchored protein 2 precursor | chr2:7459156-7460648 FORWARD LENGTH=350	18385.9	7657.11	6868.34	7689.64	7384.86	7571.11	16589.3	7294.27	5394.71	5966.11	4311.12	3922.77	-2.40115	-2.67691	-2.391	-2.48967	-2.42843	-2.27429	-3.07511	-2.78059	-3.84803	-4.22898
Bra039737	AT1G65690.1	Symbols: | Late embryogenesis abundant (LEA) hydroxyproline-rich glycoprotein family | chr1:24431642-24432898 REVERSE LENGTH=252	699.709	157.381	141.369	138.061	191.282	288.442	2729.86	1307.23	682.155	1170.94	779.433	917.008	-4.44596	-4.94952	-5.06811	-3.658	-2.42582	-2.08828	-4.00182	-2.33134	-3.50237	-2.97692
Bra005695	AT5G01110.1	Symbols: | Tetratricopeptide repeat (TPR)-like superfamily protein | chr5:42114-44303 REVERSE LENGTH=729	508.896	179.637	111.733	195.035	176.812	211.868	595.778	186.893	189.283	183.396	129.803	224.435	-2.83291	-4.55457	-2.60925	-2.87818	-2.40195	-3.1878	-3.14755	-3.24859	-4.58986	-2.65457
Bra000006	AT1G07660.1	Symbols: | Histone superfamily protein | chr1:2369212-2369523 FORWARD LENGTH=103	5362.95	2118.17	2143.78	2167.7	1817.55	2266.92	5800.41	2446.31	1526.2	1548.58	684.737	1022.01	-2.53188	-2.50163	-2.47403	-2.95065	-2.36574	-2.37109	-3.80056	-3.74563	-8.471	-5.67549
Bra007606	AT3G61460.1	Symbols: BRH1 | brassinosteroid-responsive RING-H2 | chr3:22741701-22742213 REVERSE LENGTH=170	6702.1	2218.96	2432.47	2596.07	2963.46	2834.55	4780.96	2109.01	1990.12	2020.76	1640.62	1682.94	-3.02038	-2.75527	-2.58163	-2.26158	-2.36443	-2.26692	-2.40235	-2.36592	-2.91412	-2.84084
Bra004967	AT2G40330.1	Symbols: PYL6, RCAR9 | PYR1-like 6 | chr2:16845177-16845824 REVERSE LENGTH=215	5810.98	2232.79	2717.27	2372.87	2300.29	2467.96	7342.22	3488.34	3107.93	3347.69	3040.57	2482.1	-2.60256	-2.13854	-2.44892	-2.52619	-2.35457	-2.10479	-2.36241	-2.19322	-2.41475	-2.95807
Bra015789	AT1G76090.1	Symbols: SMT3 | sterol methyltransferase 3 | chr1:28550592-28551671 REVERSE LENGTH=359	5009.38	2350.02	1817.42	2079.76	1908.86	2131.08	3832.87	1750.96	1554.01	1489.41	1591.77	1805.1	-2.13163	-2.75631	-2.40863	-2.62428	-2.35063	-2.18901	-2.46644	-2.57341	-2.40793	-2.12336
Bra026303	AT4G27860.2	Symbols: | vacuolar iron transporter (VIT) family protein | chr4:13873808-13876240 FORWARD LENGTH=596	6300.3	2792.78	3115.77	2751.45	2986.05	2682.14	2620.61	553.044	474.804	540.477	224.274	329.936	-2.25592	-2.02207	-2.28981	-2.10991	-2.34898	-4.73852	-5.51935	-4.8487	-11.6849	-7.94278
Bra040619	AT1G44800.1	Symbols: | nodulin MtN21 /EamA-like transporter family protein | chr1:16914342-16916858 REVERSE LENGTH=370	7303.99	2632.1	2114.58	2430.15	3277	3124.19	4822.61	1296.8	1384.63	1585.19	2004.28	1868.55	-2.77497	-3.45411	-3.00557	-2.22886	-2.33788	-3.71885	-3.48296	-3.04229	-2.40616	-2.58094
Bra018347	AT2G30010.1	Symbols: TBL45 | TRICHOME BIREFRINGENCE-LIKE 45 | chr2:12805833-12809226 FORWARD LENGTH=398	3950.24	1254.16	1053.48	1967.3	1054.5	1692.31	4743.46	2246.15	977.964	1084.65	846.082	1000.36	-3.14971	-3.74971	-2.00795	-3.74608	-2.33423	-2.11182	-4.85034	-4.37326	-5.60638	-4.74175
Bra017285	AT2G35860.1	Symbols: FLA16 | FASCICLIN-like arabinogalactan protein 16 precursor | chr2:15059859-15061810 FORWARD LENGTH=445	2659.03	956.309	788.219	1307.03	942.492	1145.23	3145.24	1402.41	926.375	1051.06	620.633	964.804	-2.78051	-3.37347	-2.03441	-2.82128	-2.32183	-2.24274	-3.39521	-2.99245	-5.06779	-3.25998
Bra030832	AT1G55810.1	Symbols: UKL3 | uridine kinase-like 3 | chr1:20861273-20864003 FORWARD LENGTH=466	3843.76	1683.85	1566.58	1769.85	1566.32	1656.25	3751.64	1469.17	1017.27	854.614	760.155	427.29	-2.28272	-2.4536	-2.1718	-2.45401	-2.32076	-2.55358	-3.68795	-4.38986	-4.93536	-8.78008
Bra024832	AT2G02100.1	Symbols: LCR69, PDF2.2 | low-molecular-weight cysteine-rich 69 | chr2:528397-528885 FORWARD LENGTH=77	19985.8	9650.11	6844.09	9470.85	6649.64	8685.52	13211.4	4562.87	5299.41	4586.67	4133.56	3491.12	-2.07104	-2.92015	-2.11024	-3.00555	-2.30105	-2.89541	-2.49299	-2.88039	-3.19613	-3.78429
Bra034152	AT3G10910.1	Symbols: | RING/U-box superfamily protein | chr3:3413068-3413613 REVERSE LENGTH=181	1886.63	544.236	531.563	629.395	503.208	823.404	1039.29	372.363	223.226	367.415	197.766	465.922	-3.46657	-3.54921	-2.99753	-3.74921	-2.29126	-2.79107	-4.65577	-2.82865	-5.25515	-2.23061
Bra011301	AT4G31820.1	Symbols: ENP, NPY1, MAB4 | Phototropic-responsive NPH3 family protein | chr4:15390788-15393627 REVERSE LENGTH=571	1386.41	434.064	469.692	670.309	542.671	605.997	1401.8	485.388	448.099	504.841	352.23	420.165	-3.19402	-2.95174	-2.06831	-2.55479	-2.28782	-2.888	-3.12833	-2.77672	-3.97979	-3.33631
Bra028967	AT5G55630.1	Symbols: KCO1, TPK1, ATKCO1, ATTPK1 | Outward rectifying potassium channel protein | chr5:22531718-22532893 FORWARD LENGTH=363	1064.37	485.438	332.996	432.878	419.998	467.073	1266.19	530.914	446.471	547.663	370.582	521.673	-2.1926	-3.19634	-2.45882	-2.53423	-2.27881	-2.38492	-2.836	-2.31199	-3.41676	-2.42717
Bra035303	AT5G42570.1	Symbols: | B-cell receptor-associated 31-like | chr5:17021459-17022497 REVERSE LENGTH=218	5298.68	2428.18	2457.55	2497.75	2434.89	2327.94	6675.21	2909.56	2712.77	2700.59	2594.27	2822.05	-2.18216	-2.15608	-2.12138	-2.17615	-2.27612	-2.29423	-2.46066	-2.47176	-2.57306	-2.36538
Bra013200	AT2G04570.1	Symbols: | GDSL-like Lipase/Acylhydrolase superfamily protein | chr2:1594747-1596129 FORWARD LENGTH=350	1814.02	427.869	361.014	652.069	544.11	798.079	1411.98	368.228	246.017	478.169	456.199	420.19	-4.23966	-5.02479	-2.78194	-3.33392	-2.27298	-3.83453	-5.73936	-2.95289	-3.0951	-3.36034
Bra026277	AT4G28180.1	Symbols: | unknown protein; FUNCTIONS IN: molecular_function unknown; INVOLVED IN: N-terminal protein myristoylation; LOCATED IN: cellular_component unknown; EXPRESSED IN: 15 plant structures; EXPRESSED DURING: 8 growth stages; Has 1508 Blast hits to 1315 proteins in 223 species: Archae - 4; Bacteria - 127; Metazoa - 687; Fungi - 310; Plants - 142; Viruses - 28; Other Eukaryotes - 210 (source: NC…	3217.43	871.842	896.902	1028.24	1292.09	1424.36	2828.81	1396.56	1122.58	932.119	798.618	881.565	-3.69038	-3.58727	-3.12907	-2.4901	-2.25886	-2.02556	-2.51992	-3.03482	-3.54213	-3.20885
Bra031560	NA	NA	1239.14	276.19	338.67	364.83	449.283	550.174	748.461	366.637	260.294	180.031	195.755	262.005	-4.48655	-3.65884	-3.39649	-2.75804	-2.25227	-2.04142	-2.87544	-4.1574	-3.82346	-2.85667
Bra021209	AT3G16870.1	Symbols: GATA17 | GATA transcription factor 17 | chr3:5763752-5764576 REVERSE LENGTH=190	2463.04	794.691	693.786	873.608	775.188	1097.06	1886.2	782.005	882.503	803.031	761.442	867.033	-3.09937	-3.55014	-2.81939	-3.17735	-2.24513	-2.41201	-2.13733	-2.34885	-2.47714	-2.17547
Bra038700	AT3G12145.1	Symbols: FLR1, FLOR1 | Leucine-rich repeat (LRR) family protein | chr3:3874764-3876075 REVERSE LENGTH=325	3005.81	1186.9	1039.96	1410.64	1170.47	1344.2	2575.08	810.989	611.71	748.075	473.46	552.119	-2.53249	-2.89031	-2.13081	-2.56804	-2.23613	-3.17523	-4.20964	-3.44228	-5.43885	-4.66399
Bra000777	AT4G12510.1	Symbols: | Bifunctional inhibitor/lipid-transfer protein/seed storage 2S albumin superfamily protein | chr4:7417414-7417803 REVERSE LENGTH=129	6396.94	3097.37	2402.99	2921.61	1656.31	2862.57	8046.29	3722.65	1955.38	2311.95	823.358	722.849	-2.06528	-2.66208	-2.18953	-3.86216	-2.23468	-2.16144	-4.11495	-3.4803	-9.77253	-11.1314
Bra035609	AT5G56200.1	Symbols: | C2H2 type zinc finger transcription factor family | chr5:22747768-22749249 FORWARD LENGTH=493	1274.61	298.414	256.368	322.817	454.822	571.452	1029.08	297.136	262.447	303.322	249.969	395.395	-4.27128	-4.9718	-3.9484	-2.80244	-2.23048	-3.46333	-3.9211	-3.3927	-4.11683	-2.60266
Bra040795	NA	NA	1194.77	458.252	464.917	485.34	404.022	538.091	2415.12	737.48	450.071	436.839	529.192	488.196	-2.60723	-2.56986	-2.46172	-2.95719	-2.22039	-3.27483	-5.36609	-5.52863	-4.56379	-4.94703
Bra026835	AT1G14360.1	Symbols: ATUTR3, UTR3 | UDP-galactose transporter 3 | chr1:4911362-4913029 REVERSE LENGTH=331	16261.6	6437.7	7828.43	8095.71	7979.88	7418.9	9303.97	4580.67	3734.94	2877.69	2821.39	1802.31	-2.526	-2.07725	-2.00867	-2.03783	-2.19192	-2.03114	-2.49106	-3.23314	-3.29765	-5.16225
Bra026991	AT1G12110.1	Symbols: NRT1.1, CHL1-1, NRT1, B-1, ATNRT1, CHL1 | nitrate transporter 1.1 | chr1:4105341-4109290 FORWARD LENGTH=590	2790.63	910.603	989.895	962.72	1366.56	1276.99	2651.07	890.141	1122.79	967.414	959.869	1112.82	-3.0646	-2.81912	-2.89869	-2.04208	-2.18532	-2.97826	-2.36115	-2.74037	-2.76191	-2.3823
Bra006563	AT5G20540.1	Symbols: ATBRXL4, BRX-LIKE4, BRXL4 | BREVIS RADIX-like 4 | chr5:6947943-6951760 FORWARD LENGTH=384	877.422	401.265	342.97	430.654	364.477	402.015	728.035	324.722	239.126	254.825	260.072	297.072	-2.18664	-2.55831	-2.03742	-2.40735	-2.18256	-2.24203	-3.04457	-2.857	-2.79936	-2.4507
Bra011177	AT4G30250.1	Symbols: | P-loop containing nucleoside triphosphate hydrolases superfamily protein | chr4:14811262-14812821 REVERSE LENGTH=519	1975.79	725.434	679.273	783.235	898.859	906.807	2559.35	785.83	617.729	637.722	453.702	283.821	-2.7236	-2.90868	-2.5226	-2.19811	-2.17884	-3.25687	-4.14316	-4.01327	-5.64104	-9.01748
Bra016751	AT1G12845.1	Symbols: | unknown protein; FUNCTIONS IN: molecular_function unknown; INVOLVED IN: biological_process unknown; LOCATED IN: endomembrane system; EXPRESSED IN: 22 plant structures; EXPRESSED DURING: 13 growth stages; Has 8 Blast hits to 8 proteins in 4 species: Archae - 0; Bacteria - 0; Metazoa - 0; Fungi - 0; Plants - 8; Viruses - 0; Other Eukaryotes - 0 (source: NCBI BLink). | chr1:4379023-437938…	1770.28	343.604	467.56	699.859	412.202	816.83	1316.27	604.868	559.277	425.305	305.153	384.482	-5.15209	-3.78621	-2.52948	-4.29469	-2.16726	-2.17613	-2.35352	-3.09488	-4.31348	-3.42349
Bra023680	AT5G18520.1	Symbols: | Lung seven transmembrane receptor family protein | chr5:6145027-6146349 FORWARD LENGTH=440	18464.5	7750.25	7261.76	8325.34	7907.57	8526.5	17848.6	8843.49	7122.69	6024.32	6624.12	4712.08	-2.38244	-2.5427	-2.21787	-2.33504	-2.16554	-2.01828	-2.50588	-2.96276	-2.69449	-3.78784
Bra021365	AT3G03220.1	Symbols: ATEXPA13, EXP13, ATEXP13, ATHEXP ALPHA 1.22, EXPA13 | expansin A13 | chr3:742655-743975 REVERSE LENGTH=266	1752.74	459.044	423.034	545.155	596.258	813.836	2162.16	700.293	554.219	769.932	639.231	894.304	-3.81824	-4.14326	-3.21512	-2.93957	-2.15368	-3.08751	-3.90127	-2.80825	-3.38244	-2.4177
Bra040902	AT5G21100.1	Symbols: | Plant L-ascorbate oxidase | chr5:7168312-7170719 FORWARD LENGTH=573	11007.9	4166.53	4968.21	4740.05	4515.96	5134.13	9643.88	3430	3445.81	3421.65	2358.27	2226.66	-2.64198	-2.21567	-2.32232	-2.43755	-2.14406	-2.81163	-2.79873	-2.81849	-4.08939	-4.3311
Bra018684	AT1G07720.1	Symbols: KCS3 | 3-ketoacyl-CoA synthase 3 | chr1:2390970-2392406 REVERSE LENGTH=478	4379.6	1909.03	1624.01	2014.16	1443.67	2052.25	3108.12	930.229	449.164	760.49	717.45	735.441	-2.29415	-2.69678	-2.17441	-3.03366	-2.13405	-3.34124	-6.91979	-4.087	-4.33218	-4.2262
Bra023574	AT5G16590.1	Symbols: LRR1 | Leucine-rich repeat protein kinase family protein | chr5:5431862-5433921 FORWARD LENGTH=625	4381.86	1563.61	1617.76	1898.57	1811.34	2056.4	3777.1	1524.28	903.118	743.315	1442.67	1051.18	-2.8024	-2.7086	-2.30798	-2.41913	-2.13084	-2.47796	-4.18229	-5.08143	-2.61813	-3.5932
Bra001826	AT3G21330.1	Symbols: | basic helix-loop-helix (bHLH) DNA-binding superfamily protein | chr3:7507720-7508841 FORWARD LENGTH=373	2522.86	702.82	784.248	1002.15	1122.13	1185.76	1527.42	711.32	344.627	386.033	212.683	219.487	-3.58962	-3.21692	-2.51745	-2.24828	-2.12763	-2.1473	-4.4321	-3.95671	-7.18167	-6.95905
Bra002167	AT5G18550.1	Symbols: | Zinc finger C-x8-C-x5-C-x3-H type family protein | chr5:6160515-6162729 FORWARD LENGTH=465	2341.42	858.461	748.387	984.099	910.243	1108.69	1866.3	724.257	653.138	744.673	888.445	664.099	-2.72746	-3.12862	-2.37925	-2.5723	-2.11188	-2.57685	-2.85744	-2.5062	-2.10064	-2.81027
Bra030918	AT1G53920.1	Symbols: GLIP5 | GDSL-motif lipase 5 | chr1:20137725-20139637 FORWARD LENGTH=385	5497.5	1475.41	1610.88	2031.13	2345.68	2608.79	2820.32	1195.4	1079.39	1139.14	1120.24	1171.64	-3.72608	-3.41273	-2.70662	-2.34367	-2.1073	-2.35931	-2.61288	-2.47583	-2.5176	-2.40716
Bra032823	AT1G27370.1	Symbols: SPL10 | squamosa promoter binding protein-like 10 | chr1:9505454-9506997 REVERSE LENGTH=396	1821.34	400.377	241.934	246.237	271.266	867.664	1230.79	300.726	314.561	150.239	143.847	300.868	-4.54906	-7.52825	-7.3967	-6.71422	-2.09913	-4.09273	-3.91272	-8.19221	-8.55624	-4.0908
Bra005921	AT5G07010.1	Symbols: ATST2A, ST2A | sulfotransferase 2A | chr5:2174960-2176039 REVERSE LENGTH=359	2770.2	474.995	279.307	562.177	763.637	1332.21	17892.6	6111.85	2942.95	2275.67	2424.55	1378.07	-5.83206	-9.91812	-4.92763	-3.62764	-2.0794	-2.92753	-6.07982	-7.86256	-7.37976	-12.9838
Bra020933	AT4G20170.1	Symbols: | Domain of unknown function (DUF23) | chr4:10896810-10898794 FORWARD LENGTH=504	16011.3	7405.34	7654.19	7849.41	6988.7	7716.67	16332.7	7460.26	6187.12	6797.61	5669.61	4987.99	-2.16213	-2.09183	-2.03981	-2.29103	-2.0749	-2.18929	-2.63979	-2.40271	-2.88074	-3.27441
Bra010263	AT4G30960.1	Symbols: CIPK6, SIP3, SNRK3.14, ATCIPK6 | SOS3-interacting protein 3 | chr4:15067400-15068725 FORWARD LENGTH=441	6067.93	2213.85	2319.58	2532.99	2899.22	2940.89	6681.66	2375.54	2183.21	1992.95	1812.71	1778.58	-2.74089	-2.61596	-2.39556	-2.09295	-2.0633	-2.81269	-3.06048	-3.35265	-3.68601	-3.75674
Bra033399	AT1G03440.1	Symbols: | Leucine-rich repeat (LRR) family protein | chr1:852681-853874 FORWARD LENGTH=397	2710.99	738.335	438.811	881.099	780.818	1314.95	1973.71	662.651	357.016	612.388	317.664	679.286	-3.67176	-6.17804	-3.07683	-3.47199	-2.06167	-2.97851	-5.52835	-3.22297	-6.2132	-2.90557
Bra000997	AT3G01650.1	Symbols: RGLG1 | RING domain ligase1 | chr3:242734-245062 FORWARD LENGTH=489	3541.22	1261.02	1215.43	1221.74	1426.57	1723.44	3816.95	1660.47	1475.15	1539.87	1561.23	1717.21	-2.80822	-2.91355	-2.89851	-2.48233	-2.05474	-2.29872	-2.5875	-2.47875	-2.44484	-2.22276
Bra005070	AT2G38940.1	Symbols: ATPT2, PHT1;4 | phosphate transporter 1;4 | chr2:16258500-16260104 FORWARD LENGTH=534	660.164	112.741	137.449	157.46	198.351	323.424	1550.1	147.97	269.434	240.062	156.149	201.025	-5.85558	-4.80297	-4.19258	-3.32826	-2.04117	-10.4758	-5.75317	-6.45708	-9.92706	-7.71098
Bra006644	AT5G22940.1	Symbols: F8H | FRA8 homolog | chr5:7677197-7678892 FORWARD LENGTH=469	2671.99	360.918	249.074	731.218	742.84	1309.1	1368.79	462.181	305.062	297.47	213.419	662.694	-7.40332	-10.7277	-3.65416	-3.59699	-2.04109	-2.96159	-4.48692	-4.60144	-6.41363	-2.06549
Bra016197	AT1G70640.1	Symbols: | octicosapeptide/Phox/Bem1p (PB1) domain-containing protein | chr1:26636255-26636887 FORWARD LENGTH=174	784.154	157.311	141.458	128.622	178.366	386.795	850.729	348.747	295.4	190.259	186.23	316.176	-4.98474	-5.54337	-6.09658	-4.39632	-2.02731	-2.43939	-2.87992	-4.47143	-4.56816	-2.69068
Bra027267	AT3G15250.1	Symbols: | unknown protein; BEST Arabidopsis thaliana protein match is: unknown protein (TAIR:AT1G53163.1); Has 409 Blast hits to 218 proteins in 63 species: Archae - 0; Bacteria - 22; Metazoa - 178; Fungi - 77; Plants - 38; Viruses - 1; Other Eukaryotes - 93 (source: NCBI BLink). | chr3:5136503-5137183 REVERSE LENGTH=226	924.173	212.57	158.23	218.915	352.805	458.038	561.118	175.969	172.673	144.757	258.07	221.047	-4.34762	-5.84069	-4.22161	-2.6195	-2.01768	-3.18873	-3.2496	-3.87628	-2.17429	-2.53846
Bra010372	AT4G28350.1	Symbols: | Concanavalin A-like lectin protein kinase family protein | chr4:14026577-14028622 FORWARD LENGTH=649	2398.87	1311.45	941.197	1530.66	1232.07	1413.99	654.109	134.214	70.7639	141.853	132.713	106.159	-1.82917	-2.54874	-1.56721	-1.94702	-1.69653	-4.87363	-9.24354	-4.61117	-4.92875	-6.1616
Bra016266	AT1G69780.1	Symbols: ATHB13 | Homeobox-leucine zipper protein family | chr1:26259166-26260465 FORWARD LENGTH=294	4141.91	2234.1	1691.63	2619.85	3382.43	3427.35	5670.9	2457.81	1756.12	1777.51	2075.68	2020.82	-1.85395	-2.44847	-1.58097	-1.22454	-1.20849	-2.3073	-3.22922	-3.19036	-2.73207	-2.80624
Bra035852	AT5G63180.1	Symbols: | Pectin lyase-like superfamily protein | chr5:25341106-25343113 REVERSE LENGTH=432	1994.35	1116.37	900.78	1545.28	1007.57	1699.17	1699.67	778.914	512.26	657.097	384.97	628.811	-1.78646	-2.21403	-1.29061	-1.97937	-1.17372	-2.1821	-3.31798	-2.58663	-4.41507	-2.70299
Bra034387	AT2G26680.1	Symbols: | CONTAINS InterPro DOMAIN/s: Methyltransferase FkbM (InterPro:IPR006342); Has 1073 Blast hits to 1073 proteins in 243 species: Archae - 45; Bacteria - 509; Metazoa - 0; Fungi - 4; Plants - 60; Viruses - 4; Other Eukaryotes - 451 (source: NCBI BLink). | chr2:11344003-11345288 REVERSE LENGTH=319	1753.69	974.191	860.219	890.155	932.665	900.626	2679.5	1281.59	1003.18	1208.94	951.803	1321.92	-1.80015	-2.03866	-1.9701	-1.8803	-1.94719	-2.09076	-2.67101	-2.2164	-2.81518	-2.02698
Bra022450	AT3G19770.1	Symbols: ATVPS9A, VPS9A, VPS9 | Vacuolar sorting protein 9 (VPS9) domain | chr3:6866916-6869114 FORWARD LENGTH=520	4294.71	2350.79	2108.6	2005.55	2369.94	2300.47	2749.08	1359.87	1196.29	1312.13	959.176	1001.59	-1.82692	-2.03676	-2.14141	-1.81216	-1.86688	-2.02158	-2.298	-2.09513	-2.86609	-2.74472
Bra035410	AT1G60010.1	Symbols: | unknown protein; FUNCTIONS IN: molecular_function unknown; INVOLVED IN: N-terminal protein myristoylation; LOCATED IN: cellular_component unknown; EXPRESSED IN: 22 plant structures; EXPRESSED DURING: 13 growth stages; BEST Arabidopsis thaliana protein match is: unknown protein (TAIR:AT1G10530.1); Has 185 Blast hits to 185 proteins in 18 species: Archae - 0; Bacteria - 0; Metazoa - 0; F…	3814.98	2665.7	1807.9	1680.7	1734.96	2332.55	8403.47	4158.45	2495.79	3061.79	2746.75	3887.08	-1.43114	-2.11017	-2.26988	-2.19889	-1.63554	-2.02082	-3.36706	-2.74463	-3.05942	-2.1619
Bra005987	AT5G08350.1	Symbols: | GRAM domain-containing protein / ABA-responsive protein-related | chr5:2686417-2687175 REVERSE LENGTH=222	1006.04	655.918	335.877	244.629	182.397	81.3076	1674.42	610.38	353.396	582.227	515.238	319.165	-1.53379	-2.99526	-4.11251	-5.51566	-12.3733	-2.74324	-4.73808	-2.87589	-3.2498	-5.24625
Bra017939	AT1G21670.1	Symbols: | LOCATED IN: cell wall, plant-type cell wall; EXPRESSED IN: 23 plant structures; EXPRESSED DURING: 14 growth stages; CONTAINS InterPro DOMAIN/s: WD40-like Beta Propeller (InterPro:IPR011659), Six-bladed beta-propeller, TolB-like (InterPro:IPR011042); BEST Arabidopsis thaliana protein match is: DPP6 N-terminal domain-like protein (TAIR:AT1G21680.1); Has 8461 Blast hits to 5060 proteins i…	1118.87	595.894	339.89	219.08	226.869	210.71	3262.21	561.217	195.831	239.609	289.8	280.579	-1.87763	-3.29186	-5.10713	-4.93179	-5.31	-5.81274	-16.6583	-13.6147	-11.2568	-11.6267
Bra039597	AT2G43590.1	Symbols: | Chitinase family protein | chr2:18081592-18082749 REVERSE LENGTH=264	10688.8	6166.16	4806.15	4017.16	3659.75	2349.82	2286.58	629.306	301.517	516.911	267.46	280.379	-1.73346	-2.22398	-2.66079	-2.92064	-4.54877	-3.63349	-7.58359	-4.42355	-8.54924	-8.15532
Bra029740	AT3G09020.1	Symbols: | alpha 1,4-glycosyltransferase family protein | chr3:2753307-2754542 FORWARD LENGTH=411	1430.41	755.811	500.014	576.847	363.519	328.835	1041.36	457.405	227.656	204.435	238.635	219.259	-1.89255	-2.86074	-2.4797	-3.9349	-4.34993	-2.27667	-4.57427	-5.09384	-4.36382	-4.74945
Bra035904	AT5G62180.1	Symbols: AtCXE20, CXE20 | carboxyesterase 20 | chr5:24978866-24979849 REVERSE LENGTH=327	590.229	322.369	288.2	179.943	234.26	140.04	653.274	319.054	268.772	273.94	250.883	235.404	-1.83091	-2.04798	-3.28009	-2.51955	-4.21472	-2.04753	-2.43059	-2.38473	-2.6039	-2.77512
Bra014044	AT1G45201.1	Symbols: ATTLL1, TLL1 | triacylglycerol lipase-like 1 | chr1:17123889-17128462 FORWARD LENGTH=479	3395.17	1913.26	1307.84	1632.01	756.08	955.987	1750.48	694.867	619.182	743.247	327.084	313.666	-1.77455	-2.59601	-2.08036	-4.49049	-3.55148	-2.51916	-2.82708	-2.35518	-5.35178	-5.58071
Bra012071	AT5G66440.1	Symbols: | unknown protein; BEST Arabidopsis thaliana protein match is: unknown protein (TAIR:AT4G34560.1); Has 1807 Blast hits to 1807 proteins in 277 species: Archae - 0; Bacteria - 0; Metazoa - 736; Fungi - 347; Plants - 385; Viruses - 0; Other Eukaryotes - 339 (source: NCBI BLink). | chr5:26530274-26531032 REVERSE LENGTH=252	1695.2	862.664	541.461	652.499	428.765	488.358	1758.66	694.304	549.239	705.514	875.081	709.626	-1.96508	-3.13079	-2.59801	-3.95368	-3.47122	-2.53298	-3.20199	-2.49274	-2.00971	-2.47829
Bra021527	AT3G14020.1	Symbols: NF-YA6 | nuclear factor Y, subunit A6 | chr3:4642968-4644301 FORWARD LENGTH=308	1422.33	755.173	545.022	398.034	439.146	430.485	1534.36	739.202	508.389	608.924	498.582	639.043	-1.88345	-2.60967	-3.57339	-3.23885	-3.30402	-2.0757	-3.01808	-2.51979	-3.07745	-2.40103
Bra033323	AT1G02390.1	Symbols: ATGPAT2, GPAT2 | glycerol-3-phosphate acyltransferase 2 | chr1:480921-483163 FORWARD LENGTH=530	2578.11	1322.72	1216.82	1163.56	1148.73	783.501	4281.09	1779.18	1612.28	1818.05	1150.58	1463.79	-1.9491	-2.11873	-2.21571	-2.24431	-3.2905	-2.40622	-2.6553	-2.35477	-3.72081	-2.92466
Bra036731	AT1G33240.1	Symbols: AT-GTL1, AT-GTL2, GTL1 | GT-2-like 1 | chr1:12051859-12054320 REVERSE LENGTH=669	14323	7765.13	6266.39	6255.29	6034.58	4629.88	12629.6	6188.17	5622.44	5151.96	3485.31	4298.49	-1.84453	-2.28569	-2.28974	-2.37349	-3.0936	-2.04093	-2.24628	-2.45142	-3.62367	-2.93815
Bra011573	AT4G34950.1	Symbols: | Major facilitator superfamily protein | chr4:16642544-16644759 REVERSE LENGTH=567	3151.17	1583.82	1132.08	1225.44	1386.13	1082.79	2723.87	782.2	724.978	797.378	667.813	855.084	-1.9896	-2.78352	-2.57146	-2.27336	-2.91023	-3.48232	-3.75718	-3.41603	-4.07879	-3.1855
Bra036573	AT5G26280.1	Symbols: | TRAF-like family protein | chr5:9208724-9210403 FORWARD LENGTH=350	10526.6	7346	3807.46	4579.78	3395.65	3657.51	3657.21	1137.88	1237.03	1455.76	1059.98	1298.11	-1.43297	-2.76473	-2.29849	-3.10003	-2.87808	-3.21406	-2.95644	-2.51223	-3.45026	-2.81733
Bra016840	AT1G11310.1	Symbols: MLO2, ATMLO2, PMR2 | Seven transmembrane MLO family protein | chr1:3800899-3803870 REVERSE LENGTH=573	8713.76	4384.73	3640.9	3655.79	3636.54	3175.29	7662.81	2398.37	1930.35	2533.3	1741.83	2203	-1.9873	-2.3933	-2.38355	-2.39617	-2.74424	-3.19501	-3.96965	-3.02483	-4.39929	-3.47835
Bra006609	AT5G22070.1	Symbols: | Core-2/I-branching beta-1,6-N-acetylglucosaminyltransferase family protein | chr5:7308255-7309343 FORWARD LENGTH=362	4209.96	2131.29	1533.1	1444.94	1350.33	1560.71	3655.08	1722.48	1321.77	1495.3	987.413	1381.13	-1.97531	-2.74604	-2.91359	-3.11773	-2.69746	-2.12199	-2.76529	-2.44438	-3.70167	-2.64644
Bra022837	AT2G31360.1	Symbols: ADS2, DS2 | 16:0delta9 desaturase 2 | chr2:13372121-13373546 REVERSE LENGTH=307	3398.86	1723.53	1473.96	1463.95	1085.21	1261.27	5434.74	2403.76	1977.82	2293.22	1624.66	1272.63	-1.97203	-2.30594	-2.3217	-3.13198	-2.69479	-2.26093	-2.74784	-2.36992	-3.34516	-4.27048
Bra011899	AT4G38400.1	Symbols: ATEXLA2, EXPL2, ATEXPL2, ATHEXP BETA 2.2, EXLA2 | expansin-like A2 | chr4:17978675-17979665 REVERSE LENGTH=265	7760.9	4601.37	3380.49	3272.94	2776.61	2895.16	8923.66	4418.71	3761.04	4090.63	2571.69	2607.91	-1.68665	-2.29579	-2.37123	-2.7951	-2.68065	-2.01952	-2.37266	-2.18149	-3.46996	-3.42177
Bra018271	AT2G31230.1	Symbols: ATERF15, ERF15 | ethylene-responsive element binding factor 15 | chr2:13306676-13307407 REVERSE LENGTH=243	1144.7	645.385	415.656	407.128	556.112	430.852	577.381	281.849	172.436	151.59	197.653	191.646	-1.77367	-2.75396	-2.81165	-2.0584	-2.65683	-2.04855	-3.34838	-3.80883	-2.92119	-3.01275
Bra001639	AT3G16720.1	Symbols: ATL2, TL2 | TOXICOS EN LEVADURA 2 | chr3:5692880-5693794 FORWARD LENGTH=304	1630.58	1199.63	767.823	714.211	402.56	630.24	1072.04	489.561	506.604	449.291	527.776	358.979	-1.35924	-2.12364	-2.28305	-4.05053	-2.58724	-2.1898	-2.11613	-2.38607	-2.03124	-2.98636
Bra021815	AT2G32860.1	Symbols: BGLU33 | beta glucosidase 33 | chr2:13940233-13943596 FORWARD LENGTH=613	7796.26	5286.02	3309.57	3531.56	2267.09	3145.2	5670.16	1958.04	2197.5	2114.7	1627.46	1703.22	-1.47488	-2.35567	-2.2076	-3.43888	-2.47878	-2.89583	-2.58028	-2.68131	-3.48405	-3.32908
Bra035067	AT1G78830.1	Symbols: | Curculin-like (mannose-binding) lectin family protein | chr1:29637141-29638508 REVERSE LENGTH=455	2342.69	1402.14	1145.41	1121.76	784.607	948.121	1699.11	434.839	211.563	284.082	208.693	310.938	-1.6708	-2.04529	-2.08841	-2.98581	-2.47088	-3.90745	-8.03122	-5.98105	-8.14167	-5.46447
Bra023599	AT5G17190.1	Symbols: | FUNCTIONS IN: molecular_function unknown; INVOLVED IN: intracellular protein transport; LOCATED IN: endomembrane system, integral to membrane, endoplasmic reticulum; EXPRESSED IN: 23 plant structures; EXPRESSED DURING: 13 growth stages; CONTAINS InterPro DOMAIN/s: B-cell receptor-associated 31-like (InterPro:IPR008417); BEST Arabidopsis thaliana protein match is: unknown protein (TAIR:…	6880.2	3496.69	3014.85	3197.58	2702.36	2902.29	8001.39	3586.33	2779.39	3582.46	2991.34	3292.95	-1.96763	-2.2821	-2.15169	-2.546	-2.37061	-2.23108	-2.87883	-2.23349	-2.67485	-2.42985
Bra008974	AT5G11280.1	Symbols: | unknown protein; BEST Arabidopsis thaliana protein match is: unknown protein (TAIR:AT1G80200.1); Has 30201 Blast hits to 17322 proteins in 780 species: Archae - 12; Bacteria - 1396; Metazoa - 17338; Fungi - 3422; Plants - 5037; Viruses - 0; Other Eukaryotes - 2996 (source: NCBI BLink). | chr5:3597321-3598347 FORWARD LENGTH=209	6347.31	3435.58	2628.59	2712.64	2269.05	2697.88	2024.89	956.598	606.814	899.127	665.347	705.516	-1.84752	-2.41472	-2.3399	-2.79734	-2.3527	-2.11676	-3.33692	-2.25206	-3.04336	-2.87008
Bra036493	AT2G20680.1	Symbols: MAN2, AtMAN2 | Glycosyl hydrolase superfamily protein | chr2:8921024-8923066 FORWARD LENGTH=433	665.442	334.332	280.434	299.823	241.821	291.96	787.586	312.923	270.907	282.609	275.725	299.929	-1.99036	-2.3729	-2.21945	-2.7518	-2.27922	-2.51687	-2.90722	-2.78684	-2.85642	-2.62591
Bra008696	AT5G15470.1	Symbols: GAUT14 | galacturonosyltransferase 14 | chr5:5021433-5024168 REVERSE LENGTH=532	4340.86	2263.07	1948.13	1939.53	2075.66	2007.02	4904.71	2251.73	2298.79	1385.46	2084.8	1822.3	-1.91813	-2.22822	-2.2381	-2.09132	-2.16284	-2.1782	-2.13361	-3.54013	-2.3526	-2.69149
Bra012801	AT3G52470.1	Symbols: | Late embryogenesis abundant (LEA) hydroxyproline-rich glycoprotein family | chr3:19450750-19451376 FORWARD LENGTH=208	7288.03	3788.24	2455.47	3430.22	2203.71	3392.45	4044.77	1571.54	1204.8	1353.16	1128.17	1238.71	-1.92386	-2.96808	-2.12465	-3.30716	-2.14831	-2.57376	-3.35721	-2.98913	-3.58525	-3.26531
Bra033687	AT5G43600.1	Symbols: ATAAH-2, UAH | ureidoglycolate amidohydrolase | chr5:17512651-17515280 FORWARD LENGTH=476	3071.54	1833.25	1339.85	1438.49	1208.54	1446.24	3829.73	1602	1186.7	1496.89	1110.88	1408.55	-1.67546	-2.29245	-2.13525	-2.54153	-2.12381	-2.39059	-3.22721	-2.55846	-3.44747	-2.71892
Bra001441	AT2G22980.1	Symbols: SCPL13 | serine carboxypeptidase-like 13 | chr2:9779029-9783078 FORWARD LENGTH=430	994.173	503.868	615.489	475.836	559.714	577.803	1171	516.162	530.961	528.119	342.107	388.84	-1.97308	-1.61526	-2.08932	-1.77622	-1.72061	-2.26867	-2.20544	-2.2173	-3.42291	-3.01152
Bra035625	AT5G56550.1	Symbols: OXS3, ATOXS3 | oxidative stress 3 | chr5:22895847-22896502 REVERSE LENGTH=172	649.262	350.052	497.995	323.838	245.535	150.081	2465.88	1141.74	441.627	668.378	493.589	265.623	-1.85476	-1.30375	-2.0049	-2.64427	-4.32608	-2.15976	-5.58363	-3.68935	-4.99582	-9.28338
Bra021572	AT3G14690.1	Symbols: CYP72A15 | cytochrome P450, family 72, subfamily A, polypeptide 15 | chr3:4937410-4939310 FORWARD LENGTH=512	1719.77	1068.59	1107.64	766	525.48	413.692	1485.24	698.716	563.518	570.552	464.275	495.303	-1.60938	-1.55264	-2.24513	-3.27276	-4.15713	-2.12567	-2.63566	-2.60316	-3.19905	-2.99865
Bra004326	AT1G68620.1	Symbols: | alpha/beta-Hydrolases superfamily protein | chr1:25766018-25767028 FORWARD LENGTH=336	2664.08	1512.44	1481.21	1077.09	1010.67	787.031	1911.17	723.082	410.905	292.632	290.895	267.856	-1.76145	-1.79858	-2.47341	-2.63595	-3.38497	-2.64309	-4.65112	-6.53097	-6.56997	-7.13507
Bra018160	AT3G47340.1	Symbols: ASN1, DIN6, AT-ASN1 | glutamine-dependent asparagine synthase 1 | chr3:17438136-17441043 REVERSE LENGTH=584	2062.73	1470.7	1040.87	771.003	660.415	631.413	3152.29	898.854	474.81	258.408	241.194	275.565	-1.40255	-1.98174	-2.67539	-3.12338	-3.26685	-3.50701	-6.63906	-12.1989	-13.0695	-11.4394
Bra004327	AT1G68620.1	Symbols: | alpha/beta-Hydrolases superfamily protein | chr1:25766018-25767028 FORWARD LENGTH=336	3098.7	1608.3	1681.67	1130.48	1298.92	1040.85	2026.09	942.328	457.655	707.266	364.32	352.221	-1.92669	-1.84263	-2.74105	-2.3856	-2.97709	-2.15009	-4.42711	-2.86468	-5.56129	-5.75233
Bra027685	AT1G64190.1	Symbols: | 6-phosphogluconate dehydrogenase family protein | chr1:23825549-23827012 REVERSE LENGTH=487	4811.77	3006.24	2480.47	2092.85	1923.97	1702.82	7129.83	3335.76	2382.53	2802.63	2260.96	2545.68	-1.60059	-1.93986	-2.29915	-2.50096	-2.82577	-2.13739	-2.99255	-2.54398	-3.15345	-2.80076
Bra006574	NA	NA	1015.1	708.141	597.823	474.913	419.997	377.498	1525.17	734.726	601.078	592.467	486.47	492.869	-1.43347	-1.69799	-2.13744	-2.41692	-2.68902	-2.07584	-2.53739	-2.57427	-3.13518	-3.09447
Bra033337	AT1G02640.1	Symbols: BXL2, ATBXL2 | beta-xylosidase 2 | chr1:564293-567580 FORWARD LENGTH=768	5311.35	3088	2894.74	2492.4	2536.08	2036.08	3387.25	1613.49	767.609	851.886	635.565	515.385	-1.72	-1.83483	-2.13102	-2.09431	-2.60862	-2.09933	-4.41273	-3.97618	-5.32951	-6.57227
Bra040291	AT3G06780.1	Symbols: | glycine-rich protein | chr3:2143634-2144239 FORWARD LENGTH=201	913.476	483.032	500.9	385.591	356.02	353.517	6152.79	2350.35	1471.79	1865.94	1469.38	1251.15	-1.89113	-1.82367	-2.36903	-2.5658	-2.58397	-2.61782	-4.18048	-3.29742	-4.18734	-4.91771
Bra021316	AT5G40780.1	Symbols: LHT1 | lysine histidine transporter 1 | chr5:16323823-16327082 FORWARD LENGTH=446	696.145	362.555	356.515	329.756	296.618	270.405	1354.52	403.072	575.183	515.284	346.895	584.591	-1.92011	-1.95264	-2.11109	-2.34694	-2.57445	-3.36049	-2.35494	-2.62869	-3.9047	-2.31704
Bra024410	AT5G65690.1	Symbols: PCK2, PEPCK | phosphoenolpyruvate carboxykinase 2 | chr5:26266477-26269486 FORWARD LENGTH=670	549.839	362.395	361.201	273.719	270.289	223.711	4004.12	1154.05	707.749	1282.17	482.651	389.625	-1.51724	-1.52225	-2.00877	-2.03426	-2.45781	-3.46962	-5.65754	-3.12292	-8.2961	-10.2769
Bra023683	AT5G18550.1	Symbols: | Zinc finger C-x8-C-x5-C-x3-H type family protein | chr5:6160515-6162729 FORWARD LENGTH=465	1025.43	529.619	540.362	447.847	414.998	417.968	949.562	324.913	317.182	335.183	295.196	265.556	-1.93617	-1.89767	-2.28969	-2.47093	-2.45337	-2.92251	-2.99374	-2.83297	-3.21672	-3.57575
Bra003707	AT1G76790.1	Symbols: | O-methyltransferase family protein | chr1:28822355-28823630 REVERSE LENGTH=367	1877.25	1063.57	1105.6	881.568	826.422	816.007	2134.37	1006.38	997.964	1015.66	642.445	684.728	-1.76505	-1.69795	-2.12944	-2.27154	-2.30053	-2.12084	-2.13872	-2.10146	-3.32226	-3.11711
Bra026058	AT1G16410.1	Symbols: CYP79F1, BUS1, SPS1 | cytochrome p450 79f1 | chr1:5608862-5611118 FORWARD LENGTH=538	1206.27	1193.57	605.931	945.432	475.49	879.202	1114.78	397.518	390.8	501.098	491.905	536.241	-1.01064	-1.99077	-1.27589	-2.5369	-1.37201	-2.80435	-2.85256	-2.22467	-2.26625	-2.07888
Bra034140	AT3G10720.2	Symbols: | Plant invertase/pectin methylesterase inhibitor superfamily | chr3:3354639-3357581 REVERSE LENGTH=619	5275.98	3457.33	2901.87	3270.74	2116.87	2798.38	5083.1	2286.57	1652.78	1901.28	1474.77	1692.53	-1.52603	-1.81813	-1.61308	-2.49235	-1.88537	-2.22302	-3.07548	-2.67351	-3.44671	-3.00326
Bra006919	AT3G52360.1	Symbols: | unknown protein; FUNCTIONS IN: molecular_function unknown; INVOLVED IN: response to karrikin; LOCATED IN: endomembrane system; EXPRESSED IN: 23 plant structures; EXPRESSED DURING: 14 growth stages; BEST Arabidopsis thaliana protein match is: unknown protein (TAIR:AT2G35850.1); Has 34 Blast hits to 34 proteins in 10 species: Archae - 0; Bacteria - 0; Metazoa - 0; Fungi - 0; Plants - 34;…	722.083	387.72	406.786	380.061	309.81	405.585	1239.1	360.383	300.868	338.959	312.974	473.896	-1.86238	-1.77509	-1.89991	-2.33073	-1.78035	-3.43829	-4.11842	-3.6556	-3.95911	-2.61471
Bra006641	AT5G22920.1	Symbols: | CHY-type/CTCHY-type/RING-type Zinc finger protein | chr5:7665143-7667031 FORWARD LENGTH=291	6267.7	4743	4558.28	4140.95	2739.07	3699.67	6815.12	2714.08	1493.52	1371.37	1653.99	1091.58	-1.32146	-1.37501	-1.51359	-2.28826	-1.69412	-2.51102	-4.56313	-4.96957	-4.12041	-6.24335
Bra039829	NA	NA	969.31	557.781	505.071	683.506	427.654	604.698	1104.4	353.538	216.653	346.142	285.783	332.719	-1.7378	-1.91916	-1.41814	-2.26658	-1.60297	-3.12385	-5.09755	-3.1906	-3.86447	-3.31932
Bra037115	AT5G67360.1	Symbols: ARA12 | Subtilase family protein | chr5:26872192-26874465 REVERSE LENGTH=757	1442.93	902.047	910.368	924.312	668.571	749.481	2639.22	1053.92	770.729	860.736	532.284	1058.34	-1.59962	-1.585	-1.56109	-2.15823	-1.92524	-2.50419	-3.42432	-3.06624	-4.95829	-2.49374
Bra032555	AT1G03220.1	Symbols: | Eukaryotic aspartyl protease family protein | chr1:787143-788444 FORWARD LENGTH=433	1479.48	781.876	875.255	809.274	685.779	979.108	1104.8	505.757	410.477	283.144	250.419	315.232	-1.89222	-1.69034	-1.82816	-2.15737	-1.51105	-2.18445	-2.6915	-3.9019	-4.41181	-3.50472
Bra006336	AT5G16010.1	Symbols: | 3-oxo-5-alpha-steroid 4-dehydrogenase family protein | chr5:5227982-5229012 FORWARD LENGTH=268	14181.6	7421.28	8073.25	7249.98	6705.96	7266.95	16554.5	6173.02	5530.58	4665.61	4831.37	3220.46	-1.91094	-1.75662	-1.95609	-2.11478	-1.95152	-2.68175	-2.99327	-3.5482	-3.42646	-5.14041
Bra034943	AT1G41830.1	Symbols: SKS6 | SKU5-similar 6 | chr1:15603892-15607802 REVERSE LENGTH=542	5163.6	3245.72	2618.91	4238.56	2487.05	3304.76	1366.14	607.606	450.054	432.424	246.831	326.933	-1.5909	-1.97166	-1.21824	-2.07619	-1.56247	-2.2484	-3.0355	-3.15926	-5.53472	-4.17865
Bra004980	AT2G40180.1	Symbols: ATHPP2C5, PP2C5 | phosphatase 2C5 | chr2:16782522-16784014 FORWARD LENGTH=390	688.339	513.127	597.37	418.259	334.2	440.747	873.871	327.943	355.299	253.301	175.098	320.213	-1.34146	-1.15228	-1.64572	-2.05966	-1.56176	-2.6647	-2.45954	-3.44993	-4.99075	-2.72903
Bra034372	AT2G27820.1	Symbols: PD1, ADT3 | prephenate dehydratase 1 | chr2:11856808-11858082 FORWARD LENGTH=424	5187.38	2801.53	2877.35	2737.27	2528.55	2862.8	5342.03	2467.3	2179.42	2385.45	1741.92	1842.58	-1.85162	-1.80283	-1.89509	-2.05152	-1.812	-2.16513	-2.45112	-2.23942	-3.06675	-2.89921
Bra027936	AT1G56340.1	Symbols: CRT1, CRT1a, AtCRT1a | calreticulin 1a | chr1:21090059-21092630 REVERSE LENGTH=425	4848.01	2861.51	3064.99	3040.81	2363.64	2932.62	7955.19	3655.18	3311.92	3612.41	2959.13	2456.84	-1.69421	-1.58174	-1.59432	-2.05108	-1.65313	-2.17642	-2.40199	-2.20218	-2.68835	-3.23798
Bra005550	AT2G32860.1	Symbols: BGLU33 | beta glucosidase 33 | chr2:13940233-13943596 FORWARD LENGTH=613	3721.22	3974.93	2847.3	3335.14	1825.33	2618.63	4469.49	1889.36	1497.89	1480.41	1494.38	1287.77	1.06818	-1.30693	-1.11576	-2.03866	-1.42106	-2.36561	-2.98386	-3.01909	-2.99087	-3.47072
Bra040011	AT1G33250.1	Symbols: | Protein of unknown function (DUF604) | chr1:12057524-12059346 REVERSE LENGTH=548	4031.7	2364.17	2327.46	2443.27	1994.59	2086.41	3595.33	1769.95	1599.4	1640.93	1301.38	1575.57	-1.70533	-1.73223	-1.65012	-2.02132	-1.93236	-2.03132	-2.24792	-2.19103	-2.76271	-2.28192
Bra023009	AT2G43590.1	Symbols: | Chitinase family protein | chr2:18081592-18082749 REVERSE LENGTH=264	683.993	429.795	430.506	398.002	309.599	203.303	903.357	384.414	291.185	396.675	278.747	337.078	-1.59144	-1.58881	-1.71857	-2.20929	-3.3644	-2.34996	-3.10235	-2.27732	-3.24078	-2.67996
Bra011195	NA	NA	3266.67	2304.43	1702.44	1718.35	921.966	984.076	3081.72	1441.29	1361.39	1410.19	1203.61	1035.82	-1.41756	-1.91882	-1.90105	-3.54316	-3.31953	-2.13817	-2.26366	-2.18532	-2.5604	-2.97515
Bra002214	AT5G19120.1	Symbols: | Eukaryotic aspartyl protease family protein | chr5:6414585-6415745 FORWARD LENGTH=386	5252.01	2994.87	2737.04	2769.46	2254.25	1859.62	6949.87	2453.57	1140.19	1212.55	472.507	709.7	-1.75367	-1.91886	-1.8964	-2.32983	-2.82424	-2.83255	-6.09536	-5.73162	-14.7085	-9.79269
Bra037412	AT4G01410.1	Symbols: | Late embryogenesis abundant (LEA) hydroxyproline-rich glycoprotein family | chr4:578308-578991 FORWARD LENGTH=227	822.811	532.42	473.026	478.205	370.859	322.479	1293.18	563.6	396.559	497.544	411.506	384.041	-1.54542	-1.73946	-1.72062	-2.21866	-2.55152	-2.2945	-3.261	-2.59913	-3.14255	-3.3673
Bra021549	AT3G14310.1	Symbols: ATPME3, PME3 | pectin methylesterase 3 | chr3:4772214-4775095 REVERSE LENGTH=592	9590.36	4918.74	5272.29	4945.67	4041.01	3926.47	10723.5	3842.91	2974.68	3306.61	2376.74	1979.83	-1.94976	-1.81901	-1.93914	-2.37326	-2.44249	-2.79046	-3.60493	-3.24305	-4.51185	-5.41637
Bra006315	AT5G15650.1	Symbols: RGP2, ATRGP2 | reversibly glycosylated polypeptide 2 | chr5:5092203-5094093 FORWARD LENGTH=360	1361.47	708.076	856.937	745.107	671.561	581.693	2823.83	1000.24	976.153	1063.08	796.044	647.012	-1.92277	-1.58876	-1.82721	-2.02732	-2.34053	-2.82315	-2.89281	-2.65627	-3.54733	-4.36442
Bra003918	AT1G71695.1	Symbols: | Peroxidase superfamily protein | chr1:26964359-26966557 FORWARD LENGTH=358	1168.19	643.424	755.006	663.46	376.22	501.51	587.378	263.59	216.872	159.97	110.343	143.821	-1.81558	-1.54726	-1.76075	-3.10507	-2.32935	-2.22838	-2.70841	-3.6718	-5.3232	-4.08409
Bra040010	AT1G33240.1	Symbols: AT-GTL1, AT-GTL2, GTL1 | GT-2-like 1 | chr1:12051859-12054320 REVERSE LENGTH=669	14400.6	8725.19	7357.19	7468.74	6288.8	6239.75	13259.7	6571.64	5125.87	6077.82	3616.39	3535.76	-1.65046	-1.95735	-1.92812	-2.28988	-2.30788	-2.01772	-2.58682	-2.18165	-3.66656	-3.75017
Bra003039	AT5G53730.1	Symbols: | Late embryogenesis abundant (LEA) hydroxyproline-rich glycoprotein family | chr5:21808072-21808713 REVERSE LENGTH=213	569.436	293.395	327.238	359.872	198.351	249.232	938.626	245.406	310.895	253.193	209.922	249.784	-1.94085	-1.74013	-1.58233	-2.87085	-2.28476	-3.82479	-3.01911	-3.70716	-4.47131	-3.75775
Bra004915	AT2G45470.1	Symbols: FLA8, AGP8 | FASCICLIN-like arabinogalactan protein 8 | chr2:18742797-18744059 REVERSE LENGTH=420	5159.52	3019.57	2733.83	2788.8	1739.54	2345.37	8165.58	3953.65	2949.75	3149.1	2023.13	2569.81	-1.70869	-1.88729	-1.85009	-2.96603	-2.19987	-2.06533	-2.76823	-2.59299	-4.03611	-3.1775
Bra030525	AT1G03220.1	Symbols: | Eukaryotic aspartyl protease family protein | chr1:787143-788444 FORWARD LENGTH=433	1876.81	1693.28	1217.05	1443.17	917.165	881.03	2077.83	1008.83	436.554	373.293	277.136	340.11	-1.10839	-1.5421	-1.30048	-2.04632	-2.13025	-2.05964	-4.75962	-5.56622	-7.49751	-6.10929
Bra020707	NA	NA	709.733	472.71	523.96	496.72	316.812	339.673	3249.63	1072.4	846.318	543.248	421.275	368.626	-1.50141	-1.35456	-1.42884	-2.24023	-2.08946	-3.03024	-3.83973	-5.98185	-7.7138	-8.81552
Bra014635	AT3G57260.1	Symbols: BGL2, PR2, BG2, PR-2 | beta-1,3-glucanase 2 | chr3:21188709-21189822 REVERSE LENGTH=339	11051.5	5635.01	8191.25	7503.7	6065.81	3869.53	11435.3	5578.96	3380.12	3419.04	3445.81	2516.67	-1.96122	-1.34918	-1.47281	-1.82193	-2.85603	-2.04972	-3.3831	-3.34459	-3.31861	-4.54382
Bra007890	AT1G69930.1	Symbols: ATGSTU11, GSTU11 | glutathione S-transferase TAU 11 | chr1:26337735-26338690 REVERSE LENGTH=234	585.314	411.034	631.042	377.305	338.033	236.13	2057.75	398.108	510.105	403.858	875.048	337.696	-1.424	1.07813	-1.5513	-1.73153	-2.47878	-5.16882	-4.03397	-5.09523	-2.35159	-6.0935
Bra032894	AT1G28330.1	Symbols: DRM1, DYL1 | dormancy-associated protein-like 1 | chr1:9934252-9935216 REVERSE LENGTH=122	857.339	629.366	479.894	586.805	454.913	372.887	927.296	159.127	139.262	187.597	352.545	155.525	-1.36223	-1.78652	-1.46103	-1.88462	-2.29919	-5.8274	-6.65864	-4.94302	-2.63029	-5.96236
Bra038080	AT4G15550.1	Symbols: IAGLU | indole-3-acetate beta-D-glucosyltransferase | chr4:8877877-8879301 REVERSE LENGTH=474	4402.07	3914.29	2366.39	2677.09	2360.83	1928.26	3493	1260.92	1042.91	1014.55	815.442	820.237	-1.12462	-1.86025	-1.64435	-1.86463	-2.28292	-2.7702	-3.34928	-3.44291	-4.28357	-4.25853
Bra013547	AT4G21680.1	Symbols: NRT1.8 | NITRATE TRANSPORTER 1.8 | chr4:11517540-11519576 REVERSE LENGTH=589	5686.11	3593.6	3316.78	3134.24	3021.02	2709.4	8228.33	3255.22	2756.18	3099.05	1741.09	1865.83	-1.58229	-1.71435	-1.81419	-1.88218	-2.09866	-2.52773	-2.98541	-2.65511	-4.72596	-4.41001
Bra012229	AT1G20430.1	Symbols: | unknown protein; Has 29 Blast hits to 29 proteins in 10 species: Archae - 0; Bacteria - 0; Metazoa - 0; Fungi - 0; Plants - 29; Viruses - 0; Other Eukaryotes - 0 (source: NCBI BLink). | chr1:7083471-7083821 REVERSE LENGTH=116	920.339	475.443	557.608	563.545	524.747	443.756	808.931	371.164	382.867	365.893	292.46	305.777	-1.93575	-1.65051	-1.63312	-1.75387	-2.07398	-2.17944	-2.11283	-2.21084	-2.76595	-2.64549
Bra005378	AT2G34930.1	Symbols: | disease resistance family protein / LRR family protein | chr2:14737169-14739886 REVERSE LENGTH=905	3130.45	2316.69	1644.07	2187.39	1620.67	1533.42	1710.04	694.887	494.753	801.009	759.664	492.061	-1.35126	-1.90409	-1.43113	-1.93158	-2.04148	-2.46089	-3.45635	-2.13486	-2.25105	-3.47526
Bra018469	AT4G12290.1	Symbols: | Copper amine oxidase family protein | chr4:7304434-7306973 FORWARD LENGTH=741	7922.5	5838.28	4917.9	4587.64	4161.11	3926.07	8942.19	3773.71	3452.4	3726.94	3268.86	3885.25	-1.35699	-1.61095	-1.72692	-1.90394	-2.01792	-2.3696	-2.59014	-2.39934	-2.73557	-2.30157
Bra038632	AT5G63450.1	Symbols: CYP94B1 | cytochrome P450, family 94, subfamily B, polypeptide 1 | chr5:25408987-25410519 REVERSE LENGTH=510	76.6889	22.8594	29.0602	37.0518	24.2448	19.4866	841.276	221.741	26.5988	20.4067	28.5479	20.5905	1	1	1	1	1	-3.79396	-31.6283	-41.2255	-29.4689	-40.8575
Bra000174	AT2G40180.1	Symbols: ATHPP2C5, PP2C5 | phosphatase 2C5 | chr2:16782522-16784014 FORWARD LENGTH=390	217.303	54.2665	60.344	98.1533	85.559	103.393	507.48	72.5366	130.216	66.0401	54.0377	22.2552	1	1	1	1	1	-6.99619	-3.89722	-7.68442	-9.39122	-22.8028
Bra039909	AT2G18010.1	Symbols: | SAUR-like auxin-responsive protein family | chr2:7833902-7834240 FORWARD LENGTH=112	48.2223	71.7978	40.3686	50.1413	48.3857	114.452	4792.6	1038.25	274.757	331.127	177.33	242.719	1	1	1	1	1	-4.61604	-17.443	-14.4736	-27.0264	-19.7455
Bra037007	AT4G33420.1	Symbols: | Peroxidase superfamily protein | chr4:16084856-16086105 FORWARD LENGTH=325	190.089	39.8946	50.0706	55.9145	40.0195	57.1234	796.844	96.1556	76.5058	66.3871	55.1857	50.5477	1	1	1	1	1	-8.28703	-10.4155	-12.003	-14.4393	-15.7642
Bra015102	AT3G25130.1	Symbols: | unknown protein; FUNCTIONS IN: molecular_function unknown; INVOLVED IN: biological_process unknown; LOCATED IN: plasma membrane; EXPRESSED IN: 17 plant structures; EXPRESSED DURING: 9 growth stages; Has 3885 Blast hits to 2658 proteins in 280 species: Archae - 12; Bacteria - 208; Metazoa - 970; Fungi - 222; Plants - 148; Viruses - 11; Other Eukaryotes - 2314 (source: NCBI BLink). | chr…	117.28	29.5152	26.8376	30.6731	30.7647	47.2778	671.497	124.005	60.7495	52.2142	34.6156	44.9632	1	1	1	1	1	-5.41508	-11.0535	-12.8604	-19.3987	-14.9344
Bra025728	AT1G19320.1	Symbols: | Pathogenesis-related thaumatin superfamily protein | chr1:6679327-6680178 FORWARD LENGTH=247	22183.5	1560.97	14290.2	5956.09	3636.92	1710.15	4332.76	762.292	645.506	771.534	662.255	637.24	-14.2114	-1.55236	-3.72451	-6.09953	-12.9717	-5.68386	-6.71219	-5.61577	-6.54243	-6.79926
Bra019025	AT4G27810.1	Symbols: | unknown protein; CONTAINS InterPro DOMAIN/s: Protein of unknown function DUF688 (InterPro:IPR007789); BEST Arabidopsis thaliana protein match is: unknown protein (TAIR:AT5G53030.1); Has 73 Blast hits to 66 proteins in 11 species: Archae - 0; Bacteria - 0; Metazoa - 0; Fungi - 0; Plants - 73; Viruses - 0; Other Eukaryotes - 0 (source: NCBI BLink). | chr4:13854641-13855671 REVERSE LENGTH…	473.246	28.341	48.81	21.4856	41.7852	42.395	889.997	120.545	56.9918	64.9693	33.265	75.6773	1	1	1	1	1	-7.38311	-15.6162	-13.6987	-26.7548	-11.7604
Bra015133	AT2G04100.1	Symbols: | MATE efflux family protein | chr2:1377020-1379051 REVERSE LENGTH=483	293.999	41.6158	38.0212	37.9741	26.1135	62.3069	2997.36	523.765	270.587	286.655	225.729	275.853	1	1	1	1	1	-5.72272	-11.0773	-10.4563	-13.2786	-10.8658
Bra008591	AT1G76680.1	Symbols: OPR1, ATOPR1 | 12-oxophytodienoate reductase 1 | chr1:28776982-28778271 FORWARD LENGTH=372	14316.5	13488.3	13060.8	12063	11766.9	10639.4	5960.11	2249.79	1774.26	1409.16	722.952	553.487	-1.0614	-1.09614	-1.18681	-1.21668	-1.34561	-2.64919	-3.35921	-4.22955	-8.24413	-10.7683
Bra034606	AT4G05230.1	Symbols: | Ubiquitin-like superfamily protein | chr4:2687003-2687623 FORWARD LENGTH=206	140.601	189.049	100.96	224.74	227.728	133.917	528.136	125.915	108.283	110.754	105.783	52.433	1	1	1	1	1	-4.19439	-4.87737	-4.76855	-4.99264	-10.0726
Bra001596	AT3G15500.1	Symbols: ATNAC3, ANAC055, NAC055, NAC3 | NAC domain containing protein 3 | chr3:5234731-5235882 FORWARD LENGTH=317	78.5286	94.6264	62.4957	50.0957	72.8232	46.2044	749.755	299.022	205.96	77.6836	92.7061	80.4205	1	1	1	1	1	-2.50736	-3.64029	-9.65139	-8.08744	-9.32293
Bra031090	AT2G19590.1	Symbols: ACO1, ATACO1 | ACC oxidase 1 | chr2:8476239-8477354 REVERSE LENGTH=310	266.553	84.2674	93.1953	123.445	127.234	169.664	517.183	65.4134	68.8387	84.9493	57.9464	56.1737	1	1	1	1	1	-7.90638	-7.51297	-6.08814	-8.9252	-9.20685
Bra001774	AT3G20080.1	Symbols: CYP705A15 | cytochrome P450, family 705, subfamily A, polypeptide 15 | chr3:7008813-7010463 FORWARD LENGTH=523	256.469	353.367	324.924	375.298	381.661	540.228	569.7	71.1088	84.1044	233.754	255.162	62.244	1	1	1	1	2.10641	-8.01167	-6.77372	-2.43718	-2.2327	-9.15269
Bra020440	NA	NA	97.8071	272.335	413.848	157.485	224.144	180.688	2330.98	800.681	595.239	369.094	451.88	279.305	1	1	1	1	1	-2.91125	-3.91604	-6.31541	-5.1584	-8.34564
Bra011084	AT4G29140.1	Symbols: | MATE efflux family protein | chr4:14369148-14370746 FORWARD LENGTH=532	240.006	38.4053	66.8794	49.897	38.9496	51.8432	512.146	90.7552	61.6299	63.609	77.5616	63.9818	1	1	1	1	1	-5.64316	-8.31002	-8.05147	-6.60309	-8.00456
Bra026044	AT1G16510.1	Symbols: | SAUR-like auxin-responsive protein family | chr1:5644784-5645227 REVERSE LENGTH=147	461.988	29.2298	88.3995	45.0612	58.4595	40.7448	1371.27	189.183	300.97	300.726	202.043	172.887	1	1	1	1	1	-7.24838	-4.55617	-4.55987	-6.78702	-7.9316
Bra005072	NA	NA	66.522	212.734	422.955	171.666	204.653	151.974	2094.76	875.905	586.253	567.018	408.034	279.118	1	1	1	1	1	-2.39154	-3.57313	-3.69434	-5.13379	-7.50493
Bra028980	AT5G55450.1	Symbols: | Bifunctional inhibitor/lipid-transfer protein/seed storage 2S albumin superfamily protein | chr5:22467560-22467874 FORWARD LENGTH=104	2275.77	218.404	1522.27	473.105	331.876	279.15	889.834	325.706	223.321	266.207	114.411	244.951	-10.42	-1.49498	-4.81029	-6.85729	-8.1525	-2.73202	-3.98455	-3.34264	-7.77752	-3.6327
Bra017177	AT2G37580.1	Symbols: | RING/U-box superfamily protein | chr2:15764745-15765452 FORWARD LENGTH=235	191.2	114.09	63.2573	62.4548	68.6438	51.4738	515.63	105.34	102.622	98.0941	133.287	74.2091	1	1	1	1	1	-4.89491	-5.02456	-5.25648	-3.86857	-6.94834
Bra016170	AT1G70990.1	Symbols: | proline-rich family protein | chr1:26767520-26768050 REVERSE LENGTH=176	497.71	286.863	465.319	212.595	326.93	282.766	784.971	279.024	141.008	213.214	141.2	113.943	1	1	1	1	1	-2.81327	-5.56685	-3.68161	-5.55928	-6.88916
Bra020198	AT5G22580.1	Symbols: | Stress responsive A/B Barrel Domain | chr5:7502709-7503137 FORWARD LENGTH=111	4832.14	2445.95	3180.32	3879.45	3110.15	4401.66	2699.27	1151.09	908.266	692.959	714.081	407.795	-1.97557	-1.51939	-1.24557	-1.55367	-1.0978	-2.34497	-2.97189	-3.89528	-3.78006	-6.61918
Bra011748	NA	NA	301.405	276.879	409.459	224.21	449.364	454.851	2362.35	537.397	490.281	364.211	313.644	359.487	1	1	1	1	1	-4.39591	-4.81836	-6.48621	-7.53195	-6.57145
Bra000927	AT4G01410.1	Symbols: | Late embryogenesis abundant (LEA) hydroxyproline-rich glycoprotein family | chr4:578308-578991 FORWARD LENGTH=227	363.961	190.877	180.256	148.748	135.883	113.881	1028.33	269.563	167.423	239.892	136.486	163.577	1	1	1	1	1	-3.8148	-6.14211	-4.28664	-7.53433	-6.28652
Bra020439	NA	NA	44.2294	53.1021	127.105	62.347	116.958	116.976	1957.39	911.609	507.876	670.294	369.193	318.367	1	1	1	1	1	-2.14718	-3.85407	-2.9202	-5.30181	-6.14822
Bra024032	AT4G30960.1	Symbols: CIPK6, SIP3, SNRK3.14, ATCIPK6 | SOS3-interacting protein 3 | chr4:15067400-15068725 FORWARD LENGTH=441	8487.45	4645.62	6052.24	5476.5	5188.47	5460.98	13261.2	3479.6	2115.18	2505.8	2035.85	2187	-1.82698	-1.40237	-1.54979	-1.63583	-1.5542	-3.81113	-6.26954	-5.2922	-6.51384	-6.06365
Bra018639	AT1G08280.1	Symbols: | Glycosyltransferase family 29 (sialyltransferase) family protein | chr1:2608408-2609604 FORWARD LENGTH=398	64.58	34.4951	45.7158	104.208	74.2222	72.2839	956.732	203.242	216.755	294.663	164.97	166.629	1	1	1	1	1	-4.70735	-4.41389	-3.24687	-5.79943	-5.74169
Bra030319	AT2G21140.1	Symbols: ATPRP2, PRP2 | proline-rich protein 2 | chr2:9060868-9062035 REVERSE LENGTH=321	865.275	232.451	260.765	480.071	168.617	475.572	911.692	315.785	446.627	258.452	325.84	282.127	-3.7224	-3.31822	-1.80239	-5.1316	-1.81944	-2.88707	-2.04128	-3.52751	-2.79797	-3.2315
Bra030839	AT1G55740.1	Symbols: AtSIP1, SIP1 | seed imbibition 1 | chr1:20835507-20838707 REVERSE LENGTH=754	1801.02	1546.69	1506.74	1942.76	1306.5	1917.29	1734.4	541.457	531.158	435.459	362.702	310.743	-1.16444	-1.19531	1.0787	-1.37851	1.06456	-3.20321	-3.26532	-3.98292	-4.78189	-5.58146
Bra023457	NA	NA	317.999	255.73	329.896	294.22	308.941	389.579	1479.51	332.034	232.619	256.999	313.627	268.555	1	1	1	1	1	-4.4559	-6.36023	-5.75687	-4.71742	-5.50915
Bra014924	AT3G23220.1	Symbols: | Integrase-type DNA-binding superfamily protein | chr3:8287969-8288388 FORWARD LENGTH=139	120.491	129.346	71.7963	142.403	126.422	157.46	554.404	165.266	103.809	169.864	72.7033	102.123	1	1	1	1	1	-3.35462	-5.34062	-3.26381	-7.62557	-5.42879
Bra028667	AT5G08200.1	Symbols: | peptidoglycan-binding LysM domain-containing protein | chr5:2638385-2640508 FORWARD LENGTH=409	1924.02	1669.02	1893.71	1894.44	1866.81	2475.65	2593.96	898.7	499.83	927.675	594.264	480.034	-1.15278	-1.01601	-1.01561	-1.03065	1.28671	-2.88635	-5.18968	-2.79619	-4.365	-5.4037
Bra017067	AT2G39518.1	Symbols: | Uncharacterised protein family (UPF0497) | chr2:16496029-16496937 REVERSE LENGTH=174	202.879	71.5163	78.9068	61.7057	102.787	213.007	562.989	96.5115	49.526	82.7083	196.664	105.006	1	1	1	1	1	-5.83339	-11.3675	-6.80692	-2.86269	-5.36149
Bra025522	AT5G41080.1	Symbols: | PLC-like phosphodiesterases superfamily protein | chr5:16441858-16443835 FORWARD LENGTH=374	887.414	336.577	596.925	431.417	216.805	151.812	1766.64	476.802	478.22	455.442	334.867	653.479	-2.63659	-1.48664	-2.05698	-4.09314	-5.84548	-3.70519	-3.6942	-3.87896	-5.27565	-2.70344
Bra002355	AT5G21100.1	Symbols: | Plant L-ascorbate oxidase | chr5:7168312-7170719 FORWARD LENGTH=573	16977.9	10599.9	11687.1	11879.9	13630.7	13176.2	4481.17	1397.13	1818.9	1805.29	1231.12	850.357	-1.6017	-1.4527	-1.42913	-1.24556	-1.28853	-3.20741	-2.46367	-2.48224	-3.63991	-5.26975
Bra041137	AT5G42880.1	Symbols: | Plant protein of unknown function (DUF827) | chr5:17191758-17194091 FORWARD LENGTH=751	830.958	281.618	176.209	141.109	465.005	146.606	1175.45	441.616	343.404	506.172	349.406	329.236	-2.95066	-4.71575	-5.88877	-1.78699	-5.66797	-2.6617	-3.42294	-2.32223	-3.36414	-3.57024
Bra015274	AT1G03870.1	Symbols: FLA9 | FASCICLIN-like arabinoogalactan 9 | chr1:982625-983368 REVERSE LENGTH=247	2790.48	3009.26	2442.17	2830.57	1607.84	2594.19	4025.42	1880.27	1082.22	1360.48	627.219	808.59	1.0784	-1.14262	1.01437	-1.73555	-1.07567	-2.14087	-3.71959	-2.95882	-6.41789	-4.97832
Bra012334	AT1G22550.1	Symbols: | Major facilitator superfamily protein | chr1:7966608-7968552 REVERSE LENGTH=564	3879.45	2625.68	2643.98	2756.39	2161.08	1940.92	1783.37	525.664	468.044	435.276	428.21	358.979	-1.4775	-1.46728	-1.40744	-1.79514	-1.99877	-3.3926	-3.81026	-4.0971	-4.16471	-4.9679
Bra005833	AT5G04970.1	Symbols: | Plant invertase/pectin methylesterase inhibitor superfamily | chr5:1464262-1467001 REVERSE LENGTH=624	205.184	200.424	330.164	321.034	287.602	332.211	1378.89	441.524	301.009	334.412	293.082	289.691	1	1	1	1	1	-3.12302	-4.58089	-4.12333	-4.70479	-4.75986
Bra029948	NA	NA	483.421	292.657	176.812	167.024	226.673	188.437	1197.26	410.349	415.403	210.932	187.321	257.923	1	1	1	1	1	-2.91766	-2.88217	-5.67605	-6.39149	-4.64193
Bra030397	AT1G52140.1	Symbols: | unknown protein; BEST Arabidopsis thaliana protein match is: unknown protein (TAIR:AT3G16330.1); Has 114 Blast hits to 114 proteins in 15 species: Archae - 0; Bacteria - 0; Metazoa - 0; Fungi - 0; Plants - 114; Viruses - 0; Other Eukaryotes - 0 (source: NCBI BLink). | chr1:19407559-19408185 REVERSE LENGTH=208	321.663	128.419	79.4905	119.315	59.9291	76.5707	500.664	214.276	197.461	110.163	61.3048	108.946	1	1	1	1	1	-2.33654	-2.53551	-4.54476	-8.1668	-4.59552
Bra027900	AT2G07760.1	Symbols: | Zinc knuckle (CCHC-type) family protein | chr2:3584420-3586278 REVERSE LENGTH=530	2208.92	982.667	1135.07	935.372	1043.07	438.478	1613.95	287.641	263.052	442.574	104.287	76.0359	-2.24788	-1.94607	-2.36154	-2.11771	-5.0377	-5.61099	-6.13548	-3.64673	-15.476	-21.2262
Bra033647	AT5G42880.1	Symbols: | Plant protein of unknown function (DUF827) | chr5:17191758-17194091 FORWARD LENGTH=751	348.374	104.04	69.5356	70.0999	72.0226	48.1484	623.079	259.145	218.654	259.225	169.322	137.574	1	1	1	1	1	-2.40436	-2.84961	-2.40362	-3.67985	-4.52905
Bra027357	AT3G14225.1	Symbols: GLIP4 | GDSL-motif lipase 4 | chr3:4734616-4735993 REVERSE LENGTH=377	332.599	38.6519	102.32	52.8913	49.625	61.9854	592.685	148.451	159.745	160.834	214.552	132.621	1	1	1	1	1	-3.99246	-3.71019	-3.68507	-2.76243	-4.46901
Bra021434	AT3G02760.1	Symbols: | Class II aaRS and biotin synthetases superfamily protein | chr3:597588-600650 REVERSE LENGTH=883	354.657	395.294	374.886	551.816	327.904	311.284	1772.67	517.385	522.914	531.677	464.665	398.659	1	1	1.55591	1	1	-3.42621	-3.38998	-3.33411	-3.81494	-4.44658
Bra037823	AT5G65660.1	Symbols: | hydroxyproline-rich glycoprotein family protein | chr5:26245444-26246245 REVERSE LENGTH=136	1318.79	1156.41	1409.68	1437.08	1621.67	1820.88	6921.25	3137.49	2921.55	3053.14	2382.16	1563.82	-1.14042	1.06892	1.0897	1.22967	1.38072	-2.20598	-2.36903	-2.26693	-2.90545	-4.42586
Bra018035	AT3G48760.1	Symbols: | DHHC-type zinc finger family protein | chr3:18075902-18078084 FORWARD LENGTH=476	2671.66	809.806	1374.27	912.534	853.647	545.599	3118.81	1551.95	1078.42	1049.41	1337.05	1414.02	-3.29914	-1.94406	-2.92774	-3.1297	-4.89675	-2.00961	-2.89202	-2.97197	-2.33261	-2.20563
Bra031842	AT5G67620.1	Symbols: | unknown protein; FUNCTIONS IN: molecular_function unknown; INVOLVED IN: N-terminal protein myristoylation; LOCATED IN: microtubule; BEST Arabidopsis thaliana protein match is: unknown protein (TAIR:AT5G62900.1); Has 1807 Blast hits to 1807 proteins in 277 species: Archae - 0; Bacteria - 0; Metazoa - 736; Fungi - 347; Plants - 385; Viruses - 0; Other Eukaryotes - 339 (source: NCBI BLink…	259.858	408.379	203.183	151.496	329.951	412.686	1266.62	243.509	285.853	330.506	227.396	289.823	1	1	1	1	1	-5.20153	-4.43102	-3.83237	-5.57011	-4.37032
Bra010627	AT4G37990.1	Symbols: ELI3-2, ELI3, ATCAD8, CAD-B2 | elicitor-activated gene 3-2 | chr4:17855964-17857388 FORWARD LENGTH=359	17599.8	13136.1	13728.6	13003.2	14032.1	12143.4	14396.2	6631.13	6605.38	6702.12	4996.16	3323.58	-1.3398	-1.28198	-1.3535	-1.25425	-1.44933	-2.171	-2.17947	-2.14801	-2.88145	-4.33153
Bra025730	AT1G19320.1	Symbols: | Pathogenesis-related thaumatin superfamily protein | chr1:6679327-6680178 FORWARD LENGTH=247	7332.36	1434.15	5840.74	3018.54	2123.91	1524.54	6612.26	2430.81	1857.26	1962.09	1409.87	2095.25	-5.11269	-1.25538	-2.42911	-3.45229	-4.80956	-2.72019	-3.56022	-3.37001	-4.68998	-3.15583
Bra024259	AT5G64020.1	Symbols: TBL14 | TRICHOME BIREFRINGENCE-LIKE 14 | chr5:25620534-25622034 REVERSE LENGTH=408	360.45	112.741	87.395	91.6724	89.015	70.3019	633.036	299.401	182.484	179.326	105.828	149.109	1	1	1	1	1	-2.11434	-3.46899	-3.53008	-5.98174	-4.24546
Bra019500	AT3G47340.1	Symbols: ASN1, DIN6, AT-ASN1 | glutamine-dependent asparagine synthase 1 | chr3:17438136-17441043 REVERSE LENGTH=584	228.216	240.31	315.407	207.054	168.914	161.311	514.565	163.377	104.186	122.929	118.963	121.328	1	1	1	1	1	-3.14956	-4.93891	-4.18587	-4.32542	-4.24111
Bra014207	AT2G43040.1	Symbols: NPG1 | tetratricopeptide repeat (TPR)-containing protein | chr2:17896049-17898524 REVERSE LENGTH=704	277.076	210.33	205.416	226.096	246.053	151.683	622.683	281.636	207.18	234.497	156.336	150.133	1	1	1	1	1	-2.21095	-3.00552	-2.6554	-3.98298	-4.14754
Bra017654	AT1G71880.1	Symbols: SUC1, ATSUC1 | sucrose-proton symporter 1 | chr1:27054334-27056100 FORWARD LENGTH=513	334.534	131.483	130.034	102.989	112.744	123.657	698.578	194.934	186.566	199.619	139.193	170.375	1	1	1	1	1	-3.58366	-3.7444	-3.49956	-5.01877	-4.10024
Bra011672	NA	NA	145.06	155.23	207.674	117.715	99.3877	240.681	541.386	183.502	73.5292	105.409	75.0253	134.628	1	1	1	1	1	-2.9503	-7.36287	-5.13605	-7.21605	-4.02135
Bra037419	AT5G49330.1	Symbols: MYB111, ATMYB111, PFG3 | myb domain protein 111 | chr5:19999147-20001293 REVERSE LENGTH=342	237.96	64.4215	74.7834	103.368	97.9174	133.994	599.294	111.174	119.814	133.852	107.399	151.182	1	1	1	1	1	-5.39059	-5.00187	-4.47729	-5.58007	-3.96406
Bra037478	AT5G48560.1	Symbols: | basic helix-loop-helix (bHLH) DNA-binding superfamily protein | chr5:19684160-19686871 FORWARD LENGTH=498	408.331	226.066	131.067	143.927	110.405	134.628	980.173	480.414	370.674	366.894	243.071	250.376	1	1	1	1	1	-2.04027	-2.6443	-2.67154	-4.03246	-3.9148
Bra039993	AT2G29660.1	Symbols: | zinc finger (C2H2 type) family protein | chr2:12679346-12680467 FORWARD LENGTH=373	3681.65	3305.14	3907.94	3508.23	2861.86	2474.43	3819.95	1623.24	1373.92	1498.12	865.567	986.802	-1.11392	1.06146	-1.04943	-1.28645	-1.48788	-2.35329	-2.78033	-2.54983	-4.41323	-3.87104
Bra005808	NA	NA	312.542	368.608	356.275	328.617	343.803	322.736	1264.88	626.209	505.775	347.185	385.821	327.581	1	1	1	1	1	-2.0199	-2.50087	-3.64324	-3.27841	-3.86127
Bra014208	AT3G19320.1	Symbols: | Leucine-rich repeat (LRR) family protein | chr3:6696395-6698073 REVERSE LENGTH=493	1854.64	1399.86	1434.84	1189.16	1048.75	1400.12	4290.95	1703.17	1486.29	1622.49	1620.3	1113.05	-1.32488	-1.29258	-1.55962	-1.76843	-1.32463	-2.51939	-2.88702	-2.64467	-2.64824	-3.85513
Bra025861	NA	NA	71.4251	46.3116	71.2426	73.1639	210.329	213.195	5982.01	2578.91	1462.53	1521.48	1246.45	1572.99	1	1	1	1	1	-2.31959	-4.09018	-3.9317	-4.79924	-3.80295
Bra006125	AT5G11890.1	Symbols: | FUNCTIONS IN: molecular_function unknown; LOCATED IN: plasma membrane; EXPRESSED IN: 12 plant structures; EXPRESSED DURING: 6 growth stages; BEST Arabidopsis thaliana protein match is: Late embryogenesis abundant (LEA) hydroxyproline-rich glycoprotein family (TAIR:AT1G17620.1); Has 1807 Blast hits to 1807 proteins in 277 species: Archae - 0; Bacteria - 0; Metazoa - 736; Fungi - 347; Pl…	1305.13	991.789	843.969	950.293	777.563	790.83	2455.95	1060.29	580.482	957.525	474.498	654.109	-1.31594	-1.54642	-1.3734	-1.67849	-1.65033	-2.3163	-4.23088	-2.56489	-5.17589	-3.75465
Bra027531	AT5G44130.1	Symbols: FLA13 | FASCICLIN-like arabinogalactan protein 13 precursor | chr5:17761128-17761871 FORWARD LENGTH=247	10831.5	7594.84	6664.9	7302.09	7072.29	6504.44	11073.9	5338.62	3864.67	4753.08	3741.07	2960.97	-1.42617	-1.62516	-1.48334	-1.53154	-1.66525	-2.0743	-2.86542	-2.32984	-2.96009	-3.73996
Bra020906	AT4G21680.1	Symbols: NRT1.8 | NITRATE TRANSPORTER 1.8 | chr4:11517540-11519576 REVERSE LENGTH=589	3440.44	2144.12	2470.35	2235.87	2400.39	1913.26	5549.6	2239.87	2534.83	2441.9	1543.12	1504.61	-1.60459	-1.39269	-1.53875	-1.43328	-1.79821	-2.47764	-2.18934	-2.27266	-3.59635	-3.6884
Bra015981	AT1G58270.1	Symbols: ZW9 | TRAF-like family protein | chr1:21612394-21614089 REVERSE LENGTH=396	18389.9	8961.25	9227.84	6108.43	5153.88	4563.85	3464.09	482.833	274.156	297.993	128.159	101.769	-2.05216	-1.99287	-3.01058	-3.56817	-4.02947	-7.17451	-12.6355	-11.6247	-27.0296	-34.0388
Bra023676	AT5G18470.1	Symbols: | Curculin-like (mannose-binding) lectin family protein | chr5:6127952-6129193 FORWARD LENGTH=413	664.787	151.077	366.686	206.804	201.466	165.718	847.372	236.41	221.451	337.861	253.42	385.132	-4.40032	-1.81296	-3.21458	-3.29975	-4.01156	-3.58433	-3.82645	-2.50805	-3.34375	-2.20021
Bra034878	AT4G13370.1	Symbols: | Plant protein of unknown function (DUF936) | chr4:7777916-7780334 REVERSE LENGTH=673	282.143	134.7	98.8499	115.539	121.776	265.711	685.939	218.989	154.951	160.804	120.137	187.989	1	1	1	1	1	-3.1323	-4.42681	-4.26568	-5.70964	-3.64883
Bra017135	AT2G38160.1	Symbols: | unknown protein; BEST Arabidopsis thaliana protein match is: unknown protein (TAIR:AT2G40070.2); Has 972 Blast hits to 731 proteins in 211 species: Archae - 0; Bacteria - 236; Metazoa - 194; Fungi - 201; Plants - 218; Viruses - 32; Other Eukaryotes - 91 (source: NCBI BLink). | chr2:15986643-15988464 REVERSE LENGTH=314	548.951	398.385	785.404	474.379	975.508	704.704	1651.41	665.832	579.894	793.82	450.126	456.155	-1.37794	1.43074	-1.1572	1.77704	1.28373	-2.48022	-2.84778	-2.08033	-3.66877	-3.62028
Bra004678	AT2G42280.1	Symbols: | basic helix-loop-helix (bHLH) DNA-binding superfamily protein | chr2:17611428-17613163 REVERSE LENGTH=359	6350.39	3626.26	5151.03	4310.65	4787.2	3577.89	8249.63	4096.48	3334.75	3220.5	2884.94	2282.23	-1.75122	-1.23284	-1.47319	-1.32654	-1.7749	-2.01383	-2.47384	-2.5616	-2.85955	-3.61472
Bra006617	NA	NA	306.091	308.357	164.849	138.934	412.432	314.022	634.522	143.592	136.813	242.299	218.368	177.403	1	1	1	1	1	-4.41892	-4.63788	-2.61876	-2.90575	-3.57673
Bra016091	AT1G22650.1	Symbols: | Plant neutral invertase family protein | chr1:8013529-8015647 REVERSE LENGTH=534	1104.1	202.802	449.785	450.387	572.361	285.206	919.236	258.498	264.395	213.496	200.257	245.968	-5.44423	-2.45473	-2.45145	-1.92903	-3.87124	-3.55607	-3.47675	-4.30564	-4.59028	-3.73722
Bra005410	AT4G38940.1	Symbols: | Galactose oxidase/kelch repeat superfamily protein | chr4:18152848-18153960 FORWARD LENGTH=370	31.7658	34.5623	76.8764	66.0228	31.5724	46.1272	607.97	142.331	206.418	182.998	129.769	172.683	1	1	1	1	1	-4.27152	-2.94533	-3.32228	-4.68502	-3.52073
Bra024785	AT2G03220.1	Symbols: FT1, ATFUT1, ATFT1, MUR2 | fucosyltransferase 1 | chr2:970401-972353 REVERSE LENGTH=558	415.93	226.035	312.683	311.357	335.128	214.272	750.727	364.52	246.906	304.182	136.962	213.793	1	1	1	1	1	-2.05949	-3.04054	-2.46802	-5.48128	-3.51147
Bra039804	AT3G57730.1	Symbols: | Protein kinase superfamily protein | chr3:21390328-21391395 REVERSE LENGTH=355	9927.14	5738.18	5513.14	6136.53	6492.17	7126.5	6908.65	1894.03	2114.55	2281.67	1994.17	1990	-1.73002	-1.80063	-1.61771	-1.52909	-1.39299	-3.64759	-3.2672	-3.02789	-3.46442	-3.47168
Bra027353	AT3G14240.1	Symbols: | Subtilase family protein | chr3:4741637-4743964 REVERSE LENGTH=775	1445.9	893.305	960.024	1140.77	917.922	1004.91	1661.56	568.232	603.987	591.769	435.753	482.839	-1.6186	-1.50611	-1.26748	-1.57519	-1.43884	-2.92409	-2.75099	-2.80778	-3.81308	-3.44123
Bra000778	AT4G12510.1	Symbols: | Bifunctional inhibitor/lipid-transfer protein/seed storage 2S albumin superfamily protein | chr4:7417414-7417803 REVERSE LENGTH=129	6094.76	2911.6	2210.68	3192.02	1846.78	3175.32	7954.63	3565.56	2030.98	2373.32	1032.05	865.201	-2.09327	-2.75696	-1.90937	-3.30021	-1.91942	-2.23096	-3.91665	-3.35169	-7.7076	-9.19397
Bra025559	NA	NA	69.7444	70.6497	72.9192	71.0291	165.046	351.02	613.495	172.374	162.284	180.803	75.0792	179.213	1	1	1	1	1	-3.55909	-3.78038	-3.39317	-8.1713	-3.42327
Bra020568	AT5G66900.1	Symbols: | Disease resistance protein (CC-NBS-LRR class) family | chr5:26714931-26717757 REVERSE LENGTH=809	2955.42	3353.4	3492.01	3176.36	3417.21	3441.5	533.956	153.244	175.666	126.881	225.925	156.131	1.13466	1.18156	1.07476	1.15625	1.16447	-3.48435	-3.03961	-4.20832	-2.36342	-3.41992
Bra023530	AT5G15650.1	Symbols: RGP2, ATRGP2 | reversibly glycosylated polypeptide 2 | chr5:5092203-5094093 FORWARD LENGTH=360	932.844	630.917	616.508	565.802	564.785	531.728	1505.28	582.541	558.142	647.977	514.474	441.431	-1.47855	-1.51311	-1.64871	-1.65168	-1.75436	-2.58399	-2.69695	-2.32305	-2.92586	-3.41
Bra009730	AT5G24080.1	Symbols: | Protein kinase superfamily protein | chr5:8139334-8141014 REVERSE LENGTH=470	240.253	152.192	172.733	113.929	141.836	167.349	617.44	166.49	188.101	143.372	155.091	183.057	1	1	1	1	1	-3.70857	-3.28249	-4.30656	-3.98115	-3.37294
Bra001359	AT3G10410.1	Symbols: SCPL49, CPY | SERINE CARBOXYPEPTIDASE-LIKE 49 | chr3:3235518-3238063 REVERSE LENGTH=516	2400.48	1356.24	1536.15	1041.8	1267.85	657.234	3015.66	1369.32	1277.49	1142.91	973.349	1329.86	-1.76995	-1.56266	-2.30417	-1.89335	-3.6524	-2.2023	-2.36061	-2.63858	-3.09823	-2.26765
Bra027940	AT2G43590.1	Symbols: | Chitinase family protein | chr2:18081592-18082749 REVERSE LENGTH=264	8880.08	2891.01	3448.81	5354.04	2560.12	2462.46	7673.39	2432.26	1021.92	1555.4	1758.06	577.941	-3.07162	-2.57482	-1.65858	-3.46862	-3.60618	-3.15484	-7.5088	-4.93339	-4.36469	-13.2771
Bra019256	AT4G23930.1	Symbols: | Late embryogenesis abundant (LEA) hydroxyproline-rich glycoprotein family | chr4:12436131-12436694 REVERSE LENGTH=187	651.339	274.109	258.884	213.322	328.424	182.263	610.386	246.583	218.964	301.94	236.715	282.77	-2.3762	-2.51595	-3.05331	-1.98323	-3.57362	-2.47538	-2.78761	-2.02155	-2.57857	-2.1586
Bra035540	AT5G54830.1	Symbols: | DOMON domain-containing protein / dopamine beta-monooxygenase N-terminal domain-containing protein | chr5:22273394-22276117 FORWARD LENGTH=907	2279.45	1696.8	1335.09	1504.86	1408.03	1547.76	4139.53	1710.29	1467.58	1692.39	1117.52	1303.05	-1.34338	-1.70734	-1.51473	-1.61889	-1.47274	-2.42037	-2.82065	-2.44597	-3.70421	-3.1768
Bra030385	AT1G52410.2	Symbols: TSA1 | TSK-associating protein 1 | chr1:19520762-19525361 FORWARD LENGTH=759	19278.1	13084	14236.9	12646.5	13593.5	10996.6	7266.93	2775.71	3585.55	2936.53	2352.62	2288.81	-1.47341	-1.35409	-1.52438	-1.41819	-1.7531	-2.61804	-2.02673	-2.47467	-3.08887	-3.17498
Bra024565	AT1G23140.1	Symbols: | Calcium-dependent lipid-binding (CaLB domain) family protein | chr1:8202362-8203172 REVERSE LENGTH=165	204.08	70.0025	80.7169	73.9746	74.8029	108.818	655.774	308.618	284.136	151.794	245.65	207.185	1	1	1	1	1	-2.12487	-2.30796	-4.32016	-2.66955	-3.16516
Bra016949	AT2G41190.1	Symbols: | Transmembrane amino acid transporter family protein | chr2:17167561-17170145 REVERSE LENGTH=536	849.174	465.794	613.617	466.311	501.248	480.999	1483.5	628.525	423.682	440.753	466.431	472.155	-1.82307	-1.38388	-1.82105	-1.69412	-1.76544	-2.36029	-3.50145	-3.36583	-3.18053	-3.14198
Bra001680	AT3G17710.1	Symbols: | F-box and associated interaction domains-containing protein | chr3:6055597-6056703 FORWARD LENGTH=368	490.616	89.7973	91.3687	120.467	176.708	228.748	555.312	215.48	116.001	122.469	139.616	177.011	1	1	1	1	1	-2.57709	-4.78713	-4.53431	-3.97742	-3.13716
Bra013229	AT3G25140.1	Symbols: GAUT8, QUA1 | Nucleotide-diphospho-sugar transferases superfamily protein | chr3:9154748-9156642 FORWARD LENGTH=559	21127.9	11891.8	11266.1	14405.8	13080.4	15375.1	21041.6	9737.2	7932.35	8871.78	6457.21	6732.62	-1.77668	-1.87535	-1.46662	-1.61523	-1.37416	-2.16095	-2.65263	-2.37175	-3.25862	-3.12532
Bra030259	AT2G22170.1	Symbols: | Lipase/lipooxygenase, PLAT/LH2 family protein | chr2:9427010-9427742 REVERSE LENGTH=183	22180.9	17258.1	15431.8	15731.6	13112.3	17224.8	11666.8	5558.01	4123.1	5188.95	2935.56	3751.58	-1.28525	-1.43735	-1.40996	-1.69161	-1.28773	-2.0991	-2.82962	-2.24839	-3.9743	-3.10984
Bra027425	NA	NA	3895.78	2743.81	2228.44	2688.73	2858.79	2723.52	5372.7	2630.53	2223.77	2023.55	1782.2	1744.33	-1.41984	-1.74821	-1.44893	-1.36274	-1.43042	-2.04244	-2.41603	-2.65509	-3.01464	-3.08009
Bra010352	NA	NA	304.701	820.849	977.878	808.478	682.646	826.174	4980.84	2392.11	1638.19	2335.26	1881.59	1618.85	2.69395	3.2093	2.65335	2.24038	2.71143	-2.0822	-3.04045	-2.13288	-2.64714	-3.07678
Bra014818	AT3G54430.1	Symbols: SRS6 | SHI-related sequence 6 | chr3:20147224-20147851 REVERSE LENGTH=183	797.359	575.025	630.94	611.765	747.655	851.83	3806.31	1448.48	1612.72	1424.65	1394.6	1246.22	-1.38665	-1.26376	-1.30337	-1.06648	1.06831	-2.6278	-2.36018	-2.67175	-2.72932	-3.05428
Bra024434	AT5G67620.1	Symbols: | unknown protein; FUNCTIONS IN: molecular_function unknown; INVOLVED IN: N-terminal protein myristoylation; LOCATED IN: microtubule; BEST Arabidopsis thaliana protein match is: unknown protein (TAIR:AT5G62900.1); Has 1807 Blast hits to 1807 proteins in 277 species: Archae - 0; Bacteria - 0; Metazoa - 736; Fungi - 347; Plants - 385; Viruses - 0; Other Eukaryotes - 339 (source: NCBI BLink…	445.486	133.879	368.911	130.15	219.693	368.64	1992.12	751.712	474.599	543.435	379.582	652.729	1	1	1	1	1	-2.65011	-4.19748	-3.66579	-5.24819	-3.05199
Bra025372	AT3G29030.1	Symbols: ATEXPA5, ATEXP5, ATHEXP ALPHA 1.4, EXP5, EXPA5 | expansin A5 | chr3:11011538-11013068 REVERSE LENGTH=255	990.592	852.978	617.449	1232.34	718.748	956.521	2311.74	777.003	741.458	894.171	701.544	758.027	-1.16133	-1.60433	1.24404	-1.37822	-1.03562	-2.9752	-3.11783	-2.58534	-3.29522	-3.04968
Bra003635	AT1G78850.1	Symbols: | D-mannose binding lectin protein with Apple-like carbohydrate-binding domain | chr1:29642072-29643397 REVERSE LENGTH=441	868.284	308.747	247.14	484.803	292.267	448.979	697.487	210.234	127.031	178.758	98.7836	176.99	-2.81228	-3.51333	-1.791	-2.97086	-1.93391	-3.31767	-5.49068	-3.90185	-7.06076	-3.94083
Bra004866	AT2G44790.1	Symbols: UCC2 | uclacyanin 2 | chr2:18462182-18463232 REVERSE LENGTH=202	202.174	272.819	296.756	418.646	502.423	1069.94	1389.89	506.905	362.693	295.757	397.599	462.553	1	1	1	2.4851	5.29217	-2.74191	-3.83214	-4.69943	-3.49571	-3.00482
Bra013116	NA	NA	3069.41	1444.27	1004.45	1649.44	1038.96	1778.24	1668.61	424.808	369.589	435.155	214.322	322.626	-2.12523	-3.05581	-1.86088	-2.95431	-1.72609	-3.92792	-4.51477	-3.83452	-7.78553	-5.17196
Bra006488	AT5G18970.1	Symbols: | AWPM-19-like family protein | chr5:6333714-6334539 REVERSE LENGTH=171	3075.53	1656.46	1305.7	1771.28	1042.78	1640.57	2874.37	1038.06	827.358	1146.82	822.192	541.071	-1.85669	-2.35546	-1.73633	-2.94936	-1.87467	-2.76898	-3.47416	-2.50638	-3.49598	-5.31237
Bra001326	AT3G09070.1	Symbols: | Protein of unknown function (DUF740) | chr3:2768880-2770937 REVERSE LENGTH=685	797.673	242.625	417.489	283.395	340.914	246.729	674.081	288.926	237.802	292.534	268.748	239.569	-3.28768	-1.91064	-2.8147	-2.33981	-3.23299	-2.33306	-2.83463	-2.30428	-2.50823	-2.81372
Bra007668	AT3G62200.1	Symbols: | Putative endonuclease or glycosyl hydrolase | chr3:23023437-23025671 REVERSE LENGTH=673	409.489	291.275	238.936	422.37	149.634	126.507	687.03	313.929	279.331	220.493	185.135	232.081	1	1	1	1	1	-2.18849	-2.45956	-3.11588	-3.71097	-2.9603
Bra019252	AT4G24015.1	Symbols: | RING/U-box superfamily protein | chr4:12469887-12471197 REVERSE LENGTH=174	382.515	219.25	188.516	166.306	127.396	184.7	530.438	195.323	131.389	193.858	162.413	179.756	1	1	1	1	1	-2.7157	-4.03716	-2.73622	-3.26598	-2.95088
Bra030386	AT1G52400.1	Symbols: BGL1, BGLU18, ATBG1 | beta glucosidase 18 | chr1:19515250-19517930 FORWARD LENGTH=528	5086.18	614.358	2381.27	2555.53	1368.61	1579.65	1144.08	182.481	185.449	208.923	160.473	219.527	-8.27885	-2.13591	-1.99026	-3.71631	-3.21981	-6.26958	-6.16924	-5.47608	-7.12942	-5.21157
Bra031321	AT3G22060.1	Symbols: | Receptor-like protein kinase-related family protein | chr3:7771065-7772137 FORWARD LENGTH=252	289.691	161.379	212.665	166.056	134.738	238.258	511.127	247.078	151.185	156.7	84.9489	174.764	1	1	1	1	1	-2.06869	-3.3808	-3.26182	-6.01688	-2.92467
Bra015557	AT1G67390.1	Symbols: | F-box family protein | chr1:25244690-25247139 FORWARD LENGTH=479	757.211	503.054	419.492	393.45	519.612	1126.47	2135.4	787.49	1004.32	710.59	632.21	730.737	-1.50523	-1.80507	-1.92454	-1.45726	1.48766	-2.71165	-2.12621	-3.00511	-3.37768	-2.92226
Bra024716	AT1G26440.2	Symbols: ATUPS5, UPS5 | ureide permease 5 | chr1:9144109-9145673 REVERSE LENGTH=413	2763.3	870.969	793.654	695.985	1465.88	864.366	2355.72	1095.55	904.215	844.83	704.434	831.832	-3.17267	-3.48174	-3.97034	-1.88508	-3.19691	-2.15026	-2.60527	-2.7884	-3.34413	-2.83197
Bra034904	AT4G12900.1	Symbols: | Gamma interferon responsive lysosomal thiol (GILT) reductase family protein | chr4:7548820-7549946 FORWARD LENGTH=231	418.797	256.414	141.17	194.941	141.356	98.9344	656.429	265.031	232.376	289.084	181.707	224.998	1	1	1	1	1	-2.4768	-2.82486	-2.27072	-3.61257	-2.91749
Bra026810	AT1G14710.1	Symbols: | hydroxyproline-rich glycoprotein family protein | chr1:5062168-5064697 REVERSE LENGTH=601	813.496	1276.6	881.109	1313.91	625.323	804.321	1629.96	797.661	771.158	377.348	413.164	558.951	1.56928	1.08311	1.61514	-1.30092	-1.01141	-2.04342	-2.11365	-4.31951	-3.94507	-2.91611
Bra004901	AT4G00100.1	Symbols: ATRPS13A, RPS13, PFL2, RPS13A | ribosomal protein S13A | chr4:37172-38123 FORWARD LENGTH=151	384.331	123.293	90.116	148.526	159.775	184.666	559.749	182.072	251.736	190.126	100.687	194.902	1	1	1	1	1	-3.07433	-2.22356	-2.94409	-5.5593	-2.87195
Bra013745	AT4G23930.1	Symbols: | Late embryogenesis abundant (LEA) hydroxyproline-rich glycoprotein family | chr4:12436131-12436694 REVERSE LENGTH=187	444.136	171.954	163.786	173.035	168.617	120.545	677.23	307.859	227.381	258.289	153.758	236.523	1	1	1	1	1	-2.19981	-2.97839	-2.62199	-4.40452	-2.86327
Bra017563	AT5G46330.1	Symbols: FLS2 | Leucine-rich receptor-like protein kinase family protein | chr5:18791802-18795407 FORWARD LENGTH=1173	1538.09	755.811	871.583	840.09	644.293	492.155	7880.55	2053.52	1758.03	844.758	1503.26	733.219	-2.03502	-1.76471	-1.83086	-2.38725	-3.12521	-3.83758	-4.4826	-9.32877	-5.24231	-10.7479
Bra008634	NA	NA	4903.67	1584.38	1955.14	2050.88	2575.58	1576.39	2519.91	568.269	1248.81	636.123	459.942	464.784	-3.09501	-2.50809	-2.39101	-1.90391	-3.1107	-4.43436	-2.01785	-3.96136	-5.47876	-5.42168
Bra002098	AT2G17860.1	Symbols: | Pathogenesis-related thaumatin superfamily protein | chr2:7762257-7763018 REVERSE LENGTH=253	785.592	349.154	354.692	440.737	337.576	252.768	1622.22	606.395	512.846	522.788	387.378	364.697	-2.24999	-2.21486	-1.78245	-2.32716	-3.10796	-2.67519	-3.16317	-3.10302	-4.18769	-4.44813
Bra033079	NA	NA	208.412	26.6491	46.7122	39.088	33.4057	74.0551	1983.98	621.304	575.099	660.98	510.878	708.505	1	1	1	1	1	-3.19325	-3.44981	-3.00157	-3.88347	-2.80023
Bra040246	AT3G05900.1	Symbols: | neurofilament protein-related | chr3:1761408-1763854 REVERSE LENGTH=673	2033.58	2399.91	2498.47	2340.24	2519.15	2626.01	1974.5	677.654	702.257	481.497	600.357	708.915	1.18014	1.22861	1.1508	1.23878	1.29132	-2.91373	-2.81165	-4.10075	-3.28888	-2.78524
Bra028477	AT5G40780.1	Symbols: LHT1 | lysine histidine transporter 1 | chr5:16323823-16327082 FORWARD LENGTH=446	1194.84	431.904	686.575	504.685	537.45	397.118	1851.27	609.09	590.1	665.687	476.979	680.451	-2.76645	-1.74029	-2.3675	-2.22316	-3.00878	-3.0394	-3.13721	-2.78099	-3.88124	-2.72065
Bra007603	AT3G61430.1	Symbols: PIP1A, ATPIP1, PIP1, PIP1;1 | plasma membrane intrinsic protein 1A | chr3:22733657-22735113 FORWARD LENGTH=286	11138.9	9034.03	8577.51	9058.14	8015.51	8262.74	18571.1	7704.69	6843.78	7477.78	7017.72	6743.86	-1.23299	-1.29862	-1.22971	-1.38967	-1.34809	-2.41036	-2.71357	-2.4835	-2.64632	-2.75378
Bra013107	AT2G15440.1	Symbols: | Protein of unknown function (DUF579) | chr2:6743792-6744781 REVERSE LENGTH=329	701.353	811.606	824.812	1195	900.522	1199.59	1144.72	493.671	502.028	510.11	570.925	416.034	1.1572	1.17603	1.70385	1.28398	1.71039	-2.31879	-2.28019	-2.24407	-2.00503	-2.75151
Bra001332	AT3G09190.1	Symbols: | Concanavalin A-like lectin family protein | chr3:2821650-2822687 REVERSE LENGTH=345	1164.82	1343.02	775.089	1103.23	897.202	2100.63	4140.11	1500.58	1391.04	1602.78	1253.87	1510.82	1.15299	-1.50282	-1.05583	-1.29828	1.80339	-2.75901	-2.97627	-2.58308	-3.30187	-2.74031
Bra007355	AT3G57710.1	Symbols: | Protein kinase superfamily protein | chr3:21386233-21387288 REVERSE LENGTH=351	4377.69	3956.39	4435.41	4689.33	4524.25	4898.59	5231.14	1949.47	2534.89	2309.4	1929.05	1922.58	-1.10649	1.01319	1.07119	1.03348	1.11899	-2.68337	-2.06366	-2.26515	-2.71177	-2.7209
Bra029910	AT3G48610.1	Symbols: NPC6 | non-specific phospholipase C6 | chr3:18011653-18013959 REVERSE LENGTH=520	1247.99	676.365	705.848	653.373	642.047	694.876	1234.41	488.963	531.749	602.222	426.478	454.48	-1.84514	-1.76807	-1.91007	-1.94377	-1.79599	-2.52455	-2.32141	-2.04976	-2.89443	-2.71609
Bra020898	AT4G21570.1	Symbols: | Protein of unknown function (DUF300) | chr4:11471126-11472269 REVERSE LENGTH=294	2140.9	1430.76	1960.95	1632.75	1541.61	1441.67	3404.86	1004.78	1552.96	1434.03	1322.51	1259.02	-1.49634	-1.09177	-1.31122	-1.38874	-1.48501	-3.38866	-2.1925	-2.37433	-2.57454	-2.70437
Bra029224	AT5G63450.1	Symbols: CYP94B1 | cytochrome P450, family 94, subfamily B, polypeptide 1 | chr5:25408987-25410519 REVERSE LENGTH=510	4058.03	2751.17	2693.5	2993.8	3245.87	4387.48	2686.9	1037.33	703.841	948.939	985.738	1014.54	-1.47502	-1.5066	-1.35548	-1.25021	1.08118	-2.59021	-3.81748	-2.83148	-2.72578	-2.64839
Bra012481	AT1G25370.1	Symbols: | Protein of unknown function (DUF1639) | chr1:8898046-8898934 REVERSE LENGTH=263	419.599	337.164	186.913	212.865	314.45	454.067	766.609	311.167	194.499	337.645	241.1	291.826	1	1	1	1	1	-2.46366	-3.94145	-2.27046	-3.17963	-2.62694
Bra000660	AT4G08950.1	Symbols: EXO | Phosphate-responsive 1 family protein | chr4:5740378-5741322 FORWARD LENGTH=314	7687.03	4289.28	3465.37	3955.29	2533.38	2712.04	10174.7	3347.31	2708.72	3839.22	2284.94	2354.91	-1.79215	-2.21824	-1.94348	-3.0343	-2.83441	-3.03966	-3.75628	-2.6502	-4.45294	-4.32063
Bra004648	AT2G41770.1	Symbols: | Protein of unknown function (DUF288) | chr2:17424549-17427042 REVERSE LENGTH=771	2172.07	1224.18	1560.47	1431.17	1119.89	1511.78	2178.64	847.174	982.201	1055.75	756.36	838.836	-1.77431	-1.39193	-1.51769	-1.93954	-1.43676	-2.57166	-2.21812	-2.06359	-2.88043	-2.59722
Bra002203	AT5G19025.1	Symbols: | Ribosomal protein L34e superfamily protein | chr5:6355220-6357083 REVERSE LENGTH=259	4794.41	1860.86	2542.49	2293.57	2416.91	1699.2	5903.69	2778.96	2530.47	2427.08	2572.24	1595.08	-2.57645	-1.88571	-2.09037	-1.98369	-2.82157	-2.12442	-2.33304	-2.43242	-2.29516	-3.70119
Bra029307	NA	NA	61.2886	76.4307	189.293	128.873	261.688	236.317	749.903	334.387	301.948	318.33	283.541	292.97	1	1	1	1	1	-2.24262	-2.48355	-2.35574	-2.64478	-2.55966
Bra011745	AT4G36890.1	Symbols: IRX14 | Nucleotide-diphospho-sugar transferases superfamily protein | chr4:17379631-17381627 REVERSE LENGTH=525	2726.34	2109.78	1462.62	1651.84	2183.01	2204.12	3469.99	1529.68	1546.53	1617.64	1234.32	1360.44	-1.29224	-1.86401	-1.65049	-1.24889	-1.23693	-2.26844	-2.24373	-2.14509	-2.81126	-2.55064
Bra028368	AT3G24300.1	Symbols: AMT1;3, ATAMT1;3 | ammonium transporter 1;3 | chr3:8805858-8807354 REVERSE LENGTH=498	1197.33	500.219	725.78	597.92	517.601	432.749	1171.13	452.733	427.195	460.832	436.529	334.256	-2.39361	-1.64971	-2.00249	-2.31323	-2.7668	-2.5868	-2.74144	-2.54134	-2.68282	-3.50369
Bra022099	AT5G47060.1	Symbols: | Protein of unknown function (DUF581) | chr5:19116843-19117639 FORWARD LENGTH=177	720.125	445.524	446.551	479.209	571.197	563.463	1443.6	505.506	578.521	562.989	461.529	567.695	-1.61636	-1.61264	-1.50274	-1.26073	-1.27803	-2.85575	-2.49533	-2.56417	-3.12786	-2.54291
Bra006009	AT5G08580.1	Symbols: | Calcium-binding EF hand family protein | chr5:2780976-2782961 REVERSE LENGTH=391	2923.6	1985.86	1761.64	1865.65	1529.08	1727.01	1931.16	939.117	891.266	783.803	735.655	767.702	-1.47221	-1.65959	-1.56707	-1.912	-1.69287	-2.05636	-2.16676	-2.46383	-2.62509	-2.51551
Bra028337	NA	NA	183.775	252.347	144.619	135.203	156.78	187.391	558.637	208.656	147.032	136.898	254.789	222.129	1	1	1	1	1	-2.67731	-3.79942	-4.08068	-2.19255	-2.51492
Bra023131	AT1G30760.1	Symbols: | FAD-binding Berberine family protein | chr1:10918321-10920441 FORWARD LENGTH=534	2329.77	1992.45	1461.25	2113.12	1791.31	1642.24	1764.02	670.997	768.182	720.003	738.924	704.447	-1.1693	-1.59437	-1.10253	-1.3006	-1.41865	-2.62895	-2.29636	-2.45002	-2.38728	-2.50412
Bra017958	AT3G49730.1	Symbols: | Tetratricopeptide repeat (TPR)-like superfamily protein | chr3:18445730-18447646 REVERSE LENGTH=638	180.526	71.3118	48.0234	70.2335	103.521	157.747	728.822	284.723	247.537	340.317	240.38	293.272	1	1	1	1	1	-2.55976	-2.9443	-2.1416	-3.03196	-2.48514
Bra005004	AT2G39890.1	Symbols: PROT1, ATPROT1 | proline transporter 1 | chr2:16656022-16658202 FORWARD LENGTH=442	1136.84	964.492	614.198	773.289	685.705	841.32	1738.01	845.361	686.724	717.119	652.678	701.837	-1.17869	-1.85093	-1.47014	-1.65791	-1.35126	-2.05594	-2.53087	-2.4236	-2.66289	-2.47637
Bra008738	AT5G14770.1	Symbols: | Tetratricopeptide repeat (TPR)-like superfamily protein | chr5:4772881-4775697 REVERSE LENGTH=938	393.34	108.668	123.025	128.408	126.106	236.865	543.229	178.227	206.544	174.12	105.448	220.171	1	1	1	1	1	-3.04796	-2.63009	-3.11985	-5.15163	-2.4673
Bra005420	AT2G34500.1	Symbols: CYP710A1 | cytochrome P450, family 710, subfamily A, polypeptide 1 | chr2:14539712-14541199 REVERSE LENGTH=495	462.294	210.893	183.803	271.031	318.497	454.925	579.388	204.461	221.008	116.032	214.541	235.554	1	1	1	1	1	-2.83373	-2.62157	-4.99335	-2.70059	-2.45968
Bra005722	AT5G02410.1	Symbols: | DIE2/ALG10 family | chr5:517319-519634 REVERSE LENGTH=509	836.37	285.735	355.175	331.756	430.756	314.596	1152.79	462.219	406.109	343.601	300.589	306.129	-2.92708	-2.35481	-2.52104	-1.94163	-2.65855	-2.49403	-2.83862	-3.35503	-3.8351	-3.7657
Bra007507	AT3G60120.1	Symbols: BGLU27 | beta glucosidase 27 | chr3:22206238-22208952 FORWARD LENGTH=540	251.812	58.8964	104.088	141.818	151.24	119.322	534.776	150.385	222.784	181.109	102.807	220.6	1	1	1	1	1	-3.55605	-2.40042	-2.95279	-5.20175	-2.42419
Bra011572	AT4G34940.1	Symbols: ARO1 | armadillo repeat only 1 | chr4:16639760-16641754 FORWARD LENGTH=664	129.84	134.632	169.144	128.779	621.215	557.204	516.637	238.649	66.5218	125.74	212.061	213.775	1	1	1	4.78447	4.29147	-2.16484	-7.76643	-4.10877	-2.43627	-2.41673
Bra020541	AT5G26280.1	Symbols: | TRAF-like family protein | chr5:9208724-9210403 FORWARD LENGTH=350	5866.05	4667.01	2385.37	3111.66	2036.14	2263.95	5330.93	1798.45	1377.15	1651.68	1271.81	1815.88	-1.25692	-2.45918	-1.88518	-2.88097	-2.59107	-2.96418	-3.87099	-3.22758	-4.19161	-2.93573
Bra021171	AT3G16240.1	Symbols: DELTA-TIP, TIP2;1, DELTA-TIP1, AQP1, ATTIP2;1 | delta tonoplast integral protein | chr3:5505534-5506788 FORWARD LENGTH=250	4504.76	2609.22	2157.78	2313.08	1317.18	1750.7	4217.58	2014.02	1284.34	1195.35	992.663	819.256	-1.72648	-2.08768	-1.94752	-3.42	-2.57312	-2.09411	-3.28385	-3.52832	-4.24875	-5.14806
Bra017532	AT5G46700.1	Symbols: TET1, TRN2 | Tetraspanin family protein | chr5:18951035-18952439 FORWARD LENGTH=269	849.238	457.099	517.024	521.645	475.49	459.855	815.626	367.043	407.7	287.254	319.853	344.094	-1.85789	-1.64255	-1.628	-1.78603	-1.84675	-2.22215	-2.00055	-2.83939	-2.55	-2.37036
Bra037675	AT2G43910.1	Symbols: ATHOL1, HOL1 | HARMLESS TO OZONE LAYER 1 | chr2:18184658-18186951 REVERSE LENGTH=227	7011.03	2834.36	2807.46	3198.24	3527.65	2734.46	7194.97	3119.55	3099.38	2693.33	2667.34	2180	-2.47358	-2.49729	-2.19215	-1.98745	-2.56395	-2.30641	-2.32142	-2.6714	-2.69743	-3.30044
Bra030414	AT1G51820.1	Symbols: | Leucine-rich repeat protein kinase family protein | chr1:19237407-19241883 REVERSE LENGTH=885	234.469	157.155	150.211	102.555	167.144	111.797	2018.8	778.885	838.702	777.639	713.193	853.469	1	1	1	1	1	-2.59191	-2.40705	-2.59606	-2.83065	-2.36541
Bra000773	AT4G12420.1	Symbols: SKU5 | Cupredoxin superfamily protein | chr4:7349941-7352868 REVERSE LENGTH=587	815.452	308.281	452.387	453.674	322.035	324.189	1111.04	326.664	346.042	321.802	362.47	262.014	-2.64516	-1.80255	-1.79744	-2.53218	-2.51536	-3.40117	-3.21071	-3.45256	-3.06519	-4.24038
Bra007153	AT3G55350.1	Symbols: | PIF / Ping-Pong family of plant transposases | chr3:20518518-20520690 FORWARD LENGTH=406	3190.52	1281.89	1608.98	1369.6	1687.39	1269.77	1439.6	544.215	532.969	585.265	417.035	435.751	-2.48892	-1.98295	-2.32953	-1.8908	-2.51268	-2.64528	-2.7011	-2.45974	-3.45199	-3.30372
Bra005527	AT2G33060.1	Symbols: AtRLP27, RLP27 | receptor like protein 27 | chr2:14025661-14028087 FORWARD LENGTH=808	1019.59	798.75	853.104	1028.46	711.795	847.477	1403.81	564.526	528.796	503.969	543.877	599.993	-1.27648	-1.19515	1.0087	-1.43242	-1.20309	-2.48671	-2.65473	-2.78551	-2.58112	-2.33971
Bra033078	AT3G29020.2	Symbols: MYB110 | myb domain protein 110 | chr3:11008233-11009419 REVERSE LENGTH=305	287.838	470.157	459.026	441.358	581.126	620.053	1228.66	440.156	479.323	574.765	543.296	525.485	1	1	1	2.01893	2.15417	-2.79142	-2.56332	-2.13767	-2.26149	-2.33814
Bra011828	AT4G39840.1	Symbols: | unknown protein; FUNCTIONS IN: molecular_function unknown; INVOLVED IN: biological_process unknown; LOCATED IN: endomembrane system; EXPRESSED IN: 23 plant structures; EXPRESSED DURING: 13 growth stages; Has 20719 Blast hits to 6096 proteins in 607 species: Archae - 22; Bacteria - 3243; Metazoa - 4364; Fungi - 2270; Plants - 237; Viruses - 128; Other Eukaryotes - 10455 (source: NCBI BL…	10722.8	5061.4	4178.43	5611.46	4512.48	5922.92	9952.61	3743.18	4378.22	4656.86	3196.59	3658.46	-2.11854	-2.56623	-1.91088	-2.37625	-1.81039	-2.65886	-2.27321	-2.13719	-3.11351	-2.72044
Bra024530	AT1G22690.1	Symbols: | Gibberellin-regulated family protein | chr1:8027328-8027961 FORWARD LENGTH=119	444.849	259.155	147.007	175.109	170.875	99.5717	4100.7	1851.92	1003.28	1396.9	992.284	1770.09	1	1	1	1	1	-2.2143	-4.08729	-2.93557	-4.13259	-2.31666
Bra016769	AT1G12500.1	Symbols: | Nucleotide-sugar transporter family protein | chr1:4263542-4264957 REVERSE LENGTH=361	4120.44	2273.05	1738.76	2100.1	1782.69	1673.43	5411.21	1770.82	1287.08	1777.17	1161.54	1391.63	-1.81274	-2.36976	-1.96202	-2.31136	-2.46227	-3.05577	-4.20425	-3.04485	-4.65865	-3.8884
Bra021299	AT3G18280.1	Symbols: | Bifunctional inhibitor/lipid-transfer protein/seed storage 2S albumin superfamily protein | chr3:6267102-6267392 FORWARD LENGTH=96	1703.89	850.5	675.922	961.677	579.068	694.351	1781.43	597.709	679.839	509.967	464.918	444.585	-2.0034	-2.52084	-1.77179	-2.94247	-2.45393	-2.98043	-2.62037	-3.49323	-3.83171	-4.00695
Bra005935	AT5G07440.1	Symbols: GDH2 | glutamate dehydrogenase 2 | chr5:2356153-2358012 FORWARD LENGTH=411	4410.58	2858.62	2722	2672.1	2694.26	2815.89	6318.5	2900.04	2398.81	2883.1	2684.88	2752.85	-1.54291	-1.62035	-1.6506	-1.63703	-1.56632	-2.17876	-2.63401	-2.19156	-2.35336	-2.29526
Bra018970	AT1G52410.1	Symbols: TSA1 | TSK-associating protein 1 | chr1:19520762-19525361 FORWARD LENGTH=755	3145.29	983.774	2620.38	2204.19	2213.12	1291.64	1281.78	237.142	253.248	206.765	87.4713	199.331	-3.19717	-1.20032	-1.42696	-1.4212	-2.43511	-5.40512	-5.06136	-6.19921	-14.6537	-6.43041
Bra033928	AT1G68500.1	Symbols: | unknown protein; BEST Arabidopsis thaliana protein match is: unknown protein (TAIR:AT1G25422.1); Has 16 Blast hits to 16 proteins in 6 species: Archae - 0; Bacteria - 0; Metazoa - 0; Fungi - 0; Plants - 16; Viruses - 0; Other Eukaryotes - 0 (source: NCBI BLink). | chr1:25702041-25702322 FORWARD LENGTH=93	3157.93	1124.13	1327.66	1015.23	1922.64	1298.58	3821.39	1439.4	1126.47	1315.69	686.85	760.714	-2.80922	-2.37857	-3.11056	-1.6425	-2.43183	-2.65485	-3.39236	-2.90448	-5.56365	-5.02343
Bra003365	AT3G59110.1	Symbols: | Protein kinase superfamily protein | chr3:21855673-21857847 FORWARD LENGTH=512	1605.41	1697.67	1011.26	1438.55	1212.3	1599.39	1448.62	716.674	603.251	415.646	544.532	643.21	1.05747	-1.58753	-1.11599	-1.32427	-1.00376	-2.02131	-2.40136	-3.48523	-2.6603	-2.25217
Bra004127	AT1G65730.1	Symbols: YSL7 | YELLOW STRIPE like 7 | chr1:24442639-24446122 FORWARD LENGTH=688	4640.68	2559.35	3040.19	2219.5	2555.93	1998.66	8875.31	2435.17	1727.81	2014.36	1824.72	1618.78	-1.81323	-1.52644	-2.09087	-1.81565	-2.3219	-3.64464	-5.13674	-4.40602	-4.86393	-5.48272
Bra040140	AT5G18480.1	Symbols: PGSIP6 | plant glycogenin-like starch initiation protein 6 | chr5:6131307-6133787 REVERSE LENGTH=537	1673.03	976.351	666.975	863.674	841.87	726.774	917.381	433.589	338.229	398.219	294.892	333.054	-1.71355	-2.50838	-1.93711	-1.98728	-2.30199	-2.11578	-2.71231	-2.30371	-3.11091	-2.75445
Bra037404	AT4G00900.1	Symbols: ECA2, ATECA2 | ER-type Ca2+-ATPase 2 | chr4:382690-386226 REVERSE LENGTH=1054	3876.03	2186.29	1788.53	1967.78	1883.53	1690.09	4239.58	1792.97	1912.55	1604.69	1832.99	2110.69	-1.77288	-2.16716	-1.96975	-2.05785	-2.29339	-2.36456	-2.21672	-2.64199	-2.31293	-2.00862
Bra002701	NA	NA	7138.36	5609.4	4035.27	3998.1	3950.16	3662.79	870.974	435.064	384.129	422.724	333.913	394.877	-1.27257	-1.76899	-1.78544	-1.80711	-1.94889	-2.00194	-2.2674	-2.06038	-2.60839	-2.20568
Bra009353	AT5G08580.1	Symbols: | Calcium-binding EF hand family protein | chr5:2780976-2782961 REVERSE LENGTH=391	620.868	608.524	473.365	570.144	494.472	586.394	542.916	215.037	234.311	224.596	181.062	248.943	-1.02029	-1.31161	-1.08897	-1.25562	-1.05879	-2.52476	-2.31707	-2.4173	-2.99851	-2.18088
Bra022161	AT3G16470.1	Symbols: JR1 | Mannose-binding lectin superfamily protein | chr3:5596096-5597709 REVERSE LENGTH=451	5495.36	594.716	3479.31	4380.14	1727.23	2452.61	1175.02	113.29	164.766	148.574	130.339	94.2007	-9.24031	-1.57944	-1.25461	-3.1816	-2.24062	-10.3718	-7.13145	-7.90865	-9.01511	-12.4736
Bra014984	AT3G23810.1	Symbols: SAHH2, ATSAHH2 | S-adenosyl-l-homocysteine (SAH) hydrolase 2 | chr3:8588013-8589671 REVERSE LENGTH=485	3074.47	2072.02	3027.43	3400.41	3039.27	2741.46	5559.86	2683.95	2770.79	2692.59	2399.12	2564.53	-1.4838	-1.01554	1.10602	-1.01158	-1.12147	-2.07152	-2.0066	-2.06487	-2.31746	-2.16798
Bra013059	AT2G16660.1	Symbols: | Major facilitator superfamily protein | chr2:7218930-7221592 REVERSE LENGTH=546	1984.18	636.57	595.45	814.155	1200.11	901.24	2697.98	166.108	916.278	562.693	241.37	341.656	-3.11699	-3.33224	-2.4371	-1.65333	-2.20161	-16.2423	-2.9445	-4.79476	-11.1778	-7.89677
Bra021636	AT2G30490.1	Symbols: ATC4H, C4H, CYP73A5, REF3 | cinnamate-4-hydroxylase | chr2:12993861-12995683 REVERSE LENGTH=505	14890.7	7371.19	8040.01	6919.95	7105.78	6783.92	15455.4	7634.36	7557.68	7576.28	6028.09	6872.04	-2.02012	-1.85207	-2.15185	-2.09558	-2.195	-2.02445	-2.04499	-2.03997	-2.5639	-2.24903
Bra001926	AT3G24090.1	Symbols: | glutamine-fructose-6-phosphate transaminase (isomerizing)s;sugar binding;transaminases | chr3:8697838-8700971 REVERSE LENGTH=677	1773.86	678.288	769.794	690.476	1083.03	808.59	1822.2	845.404	750.659	810.194	705.205	860.869	-2.6152	-2.30433	-2.56904	-1.63787	-2.19377	-2.15542	-2.42747	-2.24909	-2.58393	-2.1167
Bra039761	AT1G66345.1	Symbols: | Pentatricopeptide repeat (PPR) superfamily protein | chr1:24737719-24739353 FORWARD LENGTH=544	639.125	259.711	260.818	275.711	353.066	291.979	613.616	233.004	163.786	262.838	223.262	185.731	-2.46091	-2.45046	-2.3181	-1.81021	-2.18894	-2.6335	-3.74645	-2.33458	-2.74841	-3.30379
Bra016689	AT1G14670.1	Symbols: | Endomembrane protein 70 protein family | chr1:5037669-5040199 FORWARD LENGTH=592	13807.8	7152.61	6841.86	7225.19	6424.86	7564.18	20325.4	9950.26	8889.48	9311.06	6951.48	7786.3	-1.93046	-2.01814	-1.91106	-2.14912	-1.82542	-2.0427	-2.28646	-2.18293	-2.9239	-2.61041
Bra025495	AT5G41460.1	Symbols: | Protein of unknown function (DUF604) | chr5:16589724-16592197 REVERSE LENGTH=524	1133.27	750.453	502.655	638.195	592.955	522.933	1592.65	655.555	489.773	408.942	380.866	292.284	-1.51011	-2.25457	-1.77574	-1.91122	-2.16714	-2.42947	-3.25181	-3.89456	-4.18165	-5.44898
Bra027410	AT3G13650.1	Symbols: | Disease resistance-responsive (dirigent-like protein) family protein | chr3:4463056-4463616 FORWARD LENGTH=186	1611.7	930.808	755.609	912.349	754.052	837.785	548.211	67.4289	23.4447	30.4699	42.5254	22.3626	-1.73151	-2.13298	-1.76654	-2.13739	-1.92376	-8.13021	-23.3832	-17.9919	-12.8914	-24.5146
Bra022309	AT1G48760.1	Symbols: delta-ADR | delta-adaptin | chr1:18036652-18039261 REVERSE LENGTH=869	6450.27	3378.37	4086.55	4141.52	4037.22	4128.34	5128.61	2403.41	2432.2	2072.32	2257.92	2467.53	-1.90928	-1.57841	-1.55746	-1.5977	-1.56244	-2.13389	-2.10863	-2.47482	-2.27139	-2.07844
Bra038763	AT4G21680.1	Symbols: NRT1.8 | NITRATE TRANSPORTER 1.8 | chr4:11517540-11519576 REVERSE LENGTH=589	9665.04	5444.88	4483.5	4977.49	4910.13	4554.95	9696.66	3267.41	3217.72	3707.93	2239.45	2613.92	-1.77507	-2.15569	-1.94175	-1.96839	-2.12188	-2.96769	-3.01352	-2.61511	-4.32993	-3.70962
Bra004956	AT2G46040.1	Symbols: | ARID/BRIGHT DNA-binding domain;ELM2 domain protein | chr2:18935684-18937807 REVERSE LENGTH=562	760.044	447.335	308.898	419.725	360.346	473.488	771.513	364.206	312.474	370.472	296.614	363.525	-1.69905	-2.4605	-1.81081	-2.10921	-1.6052	-2.11834	-2.46905	-2.08251	-2.60107	-2.12231
Bra015104	AT3G25140.1	Symbols: GAUT8, QUA1 | Nucleotide-diphospho-sugar transferases superfamily protein | chr3:9154748-9156642 FORWARD LENGTH=559	11416.3	5276.83	5116.13	6434.94	5460.4	6409.4	13108.1	5686.83	5019.62	5742.98	4354.45	4308.79	-2.16348	-2.23143	-1.77411	-2.09074	-1.78118	-2.30499	-2.61137	-2.28246	-3.01028	-3.04218
Bra022780	AT2G30130.1	Symbols: ASL5, LBD12, PCK1 | Lateral organ boundaries (LOB) domain family protein | chr2:12868740-12869684 FORWARD LENGTH=193	209.154	40.2223	74.1421	42.5398	66.2345	168.173	727.688	328.775	265.21	346.033	325.744	353.396	1	1	1	1	1	-2.21333	-2.74382	-2.10294	-2.23393	-2.05913
Bra026971	AT1G12300.1	Symbols: | Tetratricopeptide repeat (TPR)-like superfamily protein | chr1:4184163-4186076 REVERSE LENGTH=637	424.735	354.459	366.214	366.156	469.72	441.739	917.775	454.836	434.203	455.359	378.916	446.653	1	1	1	1	1	-2.01782	-2.1137	-2.0155	-2.42211	-2.05478
Bra034488	AT1G61730.1	Symbols: | DNA-binding storekeeper protein-related transcriptional regulator | chr1:22793447-22794577 REVERSE LENGTH=376	3174.68	1445.07	1246.75	1394.65	1688.43	1542.66	4656.3	1799.53	2066.9	2154.07	1946.3	2197.44	-2.1969	-2.54636	-2.27633	-1.88026	-2.05793	-2.58751	-2.25279	-2.16163	-2.39239	-2.11897
Bra008929	AT5G11890.1	Symbols: | FUNCTIONS IN: molecular_function unknown; LOCATED IN: plasma membrane; EXPRESSED IN: 12 plant structures; EXPRESSED DURING: 6 growth stages; BEST Arabidopsis thaliana protein match is: Late embryogenesis abundant (LEA) hydroxyproline-rich glycoprotein family (TAIR:AT1G17620.1); Has 1807 Blast hits to 1807 proteins in 277 species: Archae - 0; Bacteria - 0; Metazoa - 736; Fungi - 347; Pl…	905.294	865.598	879.802	752.113	693.172	904.132	2448.86	982.969	924.213	1082.05	1004.4	1197.07	-1.04586	-1.02897	-1.20367	-1.30602	-1.00129	-2.49129	-2.64967	-2.26317	-2.43813	-2.04571
Bra036225	AT3G29030.1	Symbols: ATEXPA5, ATEXP5, ATHEXP ALPHA 1.4, EXP5, EXPA5 | expansin A5 | chr3:11011538-11013068 REVERSE LENGTH=255	1977.95	817.476	803.181	1274.05	963.089	1362.71	2338.55	1081.83	595.053	702.774	736.434	584.544	-2.41958	-2.46265	-1.55249	-2.05376	-1.45148	-2.16166	-3.92999	-3.3276	-3.17551	-4.00064
Bra038614	AT5G63180.1	Symbols: | Pectin lyase-like superfamily protein | chr5:25341106-25343113 REVERSE LENGTH=432	4954.54	2998.58	2278.15	3336.72	2420.29	4630.91	3822.55	1668.4	1197.17	1701.38	1095.69	1609.84	-1.6523	-2.17481	-1.48485	-2.04709	-1.06988	-2.29115	-3.19299	-2.24674	-3.48871	-2.37449
Bra010075	AT5G62350.1	Symbols: | Plant invertase/pectin methylesterase inhibitor superfamily protein | chr5:25037504-25038112 FORWARD LENGTH=202	5184.55	2476.5	2503.61	3042.93	2536.06	2968.26	7653.97	2251.48	1695.05	2250.2	1347.93	1378.97	-2.0935	-2.07083	-1.7038	-2.04433	-1.74666	-3.39953	-4.51548	-3.40146	-5.67831	-5.5505
Bra037889	AT4G09890.1	Symbols: | Protein of unknown function (DUF3511) | chr4:6218501-6218764 FORWARD LENGTH=87	1846.95	772.229	697.794	942.001	789.787	900.989	2024.68	632.452	640.537	700.105	613.173	711.02	-2.39171	-2.64684	-1.96067	-2.33854	-2.04991	-3.20132	-3.16091	-2.89197	-3.30197	-2.84757
Bra017113	AT2G38530.1	Symbols: LTP2, LP2, cdf3 | lipid transfer protein 2 | chr2:16128481-16128948 FORWARD LENGTH=118	1393.72	683.955	704.256	760.889	536.496	689.229	1291.34	601.489	354.396	487.391	339.11	423.655	-2.03774	-1.979	-1.8317	-2.59782	-2.02214	-2.14691	-3.64378	-2.64949	-3.80803	-3.04809
Bra016002	AT1G73260.1	Symbols: ATKTI1, KTI1 | kunitz trypsin inhibitor 1 | chr1:27547410-27548057 REVERSE LENGTH=215	5936.39	2392.64	3341.47	2474.33	3213.14	2935.95	8973.5	3156.89	4352.61	3855.8	3783.6	2925.45	-2.4811	-1.77658	-2.39919	-1.84754	-2.02197	-2.84251	-2.06164	-2.32727	-2.37168	-3.06739
Bra007881	AT1G69780.1	Symbols: ATHB13 | Homeobox-leucine zipper protein family | chr1:26259166-26260465 FORWARD LENGTH=294	2001.5	1084.49	1175.79	1653.55	1765.21	2237.88	2697.07	1241.47	978.644	1108.39	1332.23	1336.04	-1.84557	-1.70226	-1.21043	-1.13386	1.1181	-2.17248	-2.75593	-2.43332	-2.02448	-2.0187
Bra026615	AT2G02100.1	Symbols: LCR69, PDF2.2 | low-molecular-weight cysteine-rich 69 | chr2:528397-528885 FORWARD LENGTH=77	2886.18	1540.12	1146.61	1455.75	1052.63	1429.22	2322.01	1069.94	797.081	738.227	656.84	460.947	-1.874	-2.51714	-1.98261	-2.74188	-2.01941	-2.17022	-2.91314	-3.14539	-3.53512	-5.03748
Bra005551	AT2G32860.1	Symbols: BGLU33 | beta glucosidase 33 | chr2:13940233-13943596 FORWARD LENGTH=613	5325.3	3425.15	1984.56	2755.31	1596.67	2637.81	3499.99	1395.71	989.591	1008.11	878.3	957.812	-1.55476	-2.68337	-1.93274	-3.33525	-2.01883	-2.50768	-3.5368	-3.47183	-3.98496	-3.65415
Bra020489	AT5G25120.1	Symbols: CYP71B11 | ytochrome p450, family 71, subfamily B, polypeptide 11 | chr5:8662851-8664432 FORWARD LENGTH=496	12756.6	10780	10029.1	10191.4	9921.18	7716.36	5048.71	2403.67	2523.87	2342.13	2331.9	2504.75	-1.18336	-1.27196	-1.2517	-1.28579	-1.65319	-2.10042	-2.00038	-2.15561	-2.16506	-2.01565
Bra015748	AT1G76430.1	Symbols: PHT1;9 | phosphate transporter 1;9 | chr1:28679115-28681874 REVERSE LENGTH=532	20590.1	9743.02	11151.2	9939.7	10812.4	10216.5	5851.41	1974.5	1421.17	706.839	1224.88	1481	-2.11332	-1.84645	-2.0715	-1.9043	-2.01538	-2.96349	-4.11732	-8.27828	-4.77713	-3.95099
Bra028296	AT5G52180.1	Symbols: | LOCATED IN: endomembrane system; EXPRESSED IN: 22 plant structures; EXPRESSED DURING: 13 growth stages; CONTAINS InterPro DOMAIN/s: Transmembrane protein 161AB, predicted (InterPro:IPR019395); Has 82 Blast hits to 82 proteins in 35 species: Archae - 0; Bacteria - 0; Metazoa - 47; Fungi - 0; Plants - 33; Viruses - 0; Other Eukaryotes - 2 (source: NCBI BLink). | chr5:21200165-21201541 RE…	3865.61	1726.97	1473.01	2085	2178.91	1921.43	4884.15	2393.26	1944.82	2154.93	1598.9	1655.95	-2.23838	-2.62429	-1.85401	-1.7741	-2.01184	-2.04079	-2.51136	-2.2665	-3.05469	-2.94945
Bra028006	AT1G33590.1	Symbols: | Leucine-rich repeat (LRR) family protein | chr1:12177788-12179221 FORWARD LENGTH=477	9678.74	5989.2	4235.99	5230	3325.16	4812.09	5494.28	2687.87	1246.78	1812.08	1005.8	1576.85	-1.61603	-2.28488	-1.85062	-2.91076	-2.01134	-2.0441	-4.40678	-3.03203	-5.4626	-3.48434
Bra009709	AT5G23850.1	Symbols: | Arabidopsis thaliana protein of unknown function (DUF821) | chr5:8038126-8040741 FORWARD LENGTH=542	7366.91	3223.11	3537.47	3469.23	3949.46	3663.88	7194.63	2813.77	3380.2	3157.12	3553.83	2633.06	-2.28565	-2.08254	-2.1235	-1.8653	-2.01069	-2.55694	-2.12846	-2.27886	-2.02447	-2.73242
Bra012143	AT5G67210.1	Symbols: | Protein of unknown function (DUF579) | chr5:26819019-26819972 FORWARD LENGTH=317	757.238	433.251	474.792	369.82	407.487	377.37	3361.46	1009.03	826.859	941.821	616.011	690.654	-1.7478	-1.59488	-2.04759	-1.85831	-2.00662	-3.33138	-4.06534	-3.56911	-5.45682	-4.86707
Bra005048	AT2G39350.1	Symbols: | ABC-2 type transporter family protein | chr2:16430174-16432396 REVERSE LENGTH=740	370.971	283.498	296.145	242.404	298.801	306.97	567.244	249.321	268.766	243.184	270.478	283.228	1	1	1	1	1	-2.27516	-2.11055	-2.33257	-2.09719	-2.00278
Bra016314	AT1G27170.1	Symbols: | transmembrane receptors;ATP binding | chr1:9434718-9439219 FORWARD LENGTH=1384	4589.66	1226.52	2362.66	2597.98	3843	3069.52	3617.62	2112.9	1726.95	2282.59	2083.11	2686.28	-3.74202	-1.94258	-1.76663	-1.19429	-1.49524	-1.71216	-2.0948	-1.58488	-1.73664	-1.3467
Bra003411	AT3G60440.1	Symbols: | Phosphoglycerate mutase family protein | chr3:22337820-22339145 FORWARD LENGTH=291	712.832	346.075	653.151	475.137	568.673	569.426	1000.85	701.455	498.17	507.912	919.646	597.752	-2.05976	-1.09137	-1.50027	-1.2535	-1.25184	-1.42682	-2.00905	-1.97052	-1.0883	-1.67436
Bra025947	AT1G17810.1	Symbols: BETA-TIP | beta-tonoplast intrinsic protein | chr1:6130209-6131442 FORWARD LENGTH=267	3683.01	1391.83	1131.11	2012.28	2480.76	3616.93	2813.34	1857.23	1313.38	1693.23	1482.67	1735.97	-2.64616	-3.2561	-1.83027	-1.48463	-1.01827	-1.5148	-2.14206	-1.66152	-1.89748	-1.62062
Bra016931	AT2G41475.1	Symbols: | Embryo-specific protein 3, (ATS3) | chr2:17295259-17296329 REVERSE LENGTH=179	4964.37	2427.82	2121.4	2700.65	2865.8	3527.21	4571.88	2433.12	1658.26	2533.15	2356.82	2796.78	-2.04479	-2.34014	-1.83821	-1.73228	-1.40745	-1.87902	-2.75703	-1.80482	-1.93985	-1.63469
Bra039813	AT3G53720.1	Symbols: ATCHX20, CHX20 | cation/H+ exchanger 20 | chr3:19905826-19910027 REVERSE LENGTH=842	915.785	358.413	402.889	522.389	734.442	1202.3	829.145	427.58	360.257	687.165	523.845	784.057	-2.55511	-2.27305	-1.75307	-1.24691	1.31286	-1.93916	-2.30154	-1.20662	-1.58281	-1.05751
Bra006890	AT3G51990.1	Symbols: | Protein kinase superfamily protein | chr3:19287989-19289077 FORWARD LENGTH=362	5455.15	2508.14	2531.93	2832.26	2867.81	2884.78	6585.71	3459.08	3073.72	3316.61	3425.14	3302.31	-2.17498	-2.15454	-1.92608	-1.9022	-1.89101	-1.90389	-2.14259	-1.98568	-1.92276	-1.99427
Bra012013	AT2G27510.1	Symbols: ATFD3, FD3 | ferredoxin 3 | chr2:11758281-11758748 REVERSE LENGTH=155	1615.6	647.77	531.881	709.239	678.276	880.044	1022.56	686.311	508.105	656.721	572.881	892.201	-2.4941	-3.03752	-2.27793	-2.38192	-1.83582	-1.48994	-2.0125	-1.55707	-1.78494	-1.14611
Bra020412	AT5G57800.1	Symbols: FLP1, YRE, CER3, WAX2 | Fatty acid hydroxylase superfamily | chr5:23420589-23423832 FORWARD LENGTH=632	8360.78	3154.42	2993.18	3859.8	3629.26	4584.87	4449.39	2857.13	2119.03	2383.12	2645.86	3361.35	-2.6505	-2.79328	-2.16612	-2.30371	-1.82356	-1.55729	-2.09973	-1.86704	-1.68164	-1.32369
Bra025085	AT5G45290.1	Symbols: | RING/U-box superfamily protein | chr5:18350011-18352092 REVERSE LENGTH=545	1362.18	670.447	555.693	637.487	578.239	716.307	2206.16	1279.66	1099.67	1151.66	1270.31	1178.35	-2.03175	-2.45132	-2.1368	-2.35574	-1.90167	-1.72402	-2.0062	-1.91563	-1.73671	-1.87225
Bra033809	AT3G46640.1	Symbols: PCL1, LUX | Homeodomain-like superfamily protein | chr3:17183248-17184219 FORWARD LENGTH=323	910.702	444.269	453.006	379.61	398.389	468.078	1099.01	572.136	493.849	664.98	648.036	589.568	-2.04989	-2.01035	-2.39905	-2.28596	-1.94562	-1.92089	-2.2254	-1.6527	-1.69591	-1.86409
Bra021249	NA	NA	1232.31	261.803	309.036	328.183	305.747	195.294	845.404	568.879	385.205	460.783	493.413	428.149	-4.70701	-3.98759	-3.75495	-4.03049	-6.31002	-1.48609	-2.19469	-1.83471	-1.71338	-1.97456
Bra017745	AT4G36060.1	Symbols: bHLH11 | basic helix-loop-helix (bHLH) DNA-binding superfamily protein | chr4:17055397-17056567 FORWARD LENGTH=286	5060.17	1203.5	1530.07	740.322	903.477	515.644	3954.23	2443.77	1914	2133.2	2302.87	2147.2	-4.20455	-3.30715	-6.83509	-5.60077	-9.8133	-1.61809	-2.06595	-1.85366	-1.71709	-1.84158
Bra005139	AT2G38090.1	Symbols: | Duplicated homeodomain-like superfamily protein | chr2:15945278-15946775 FORWARD LENGTH=298	618.979	198.089	203.321	205.643	181.224	99.7331	524.673	342.264	248.606	334.108	298.958	282.565	-3.12475	-3.04434	-3.00997	-3.41555	-6.20635	-1.53295	-2.11046	-1.57037	-1.75501	-1.85682
Bra015647	AT1G77890.1	Symbols: | DNA-directed RNA polymerase II protein | chr1:29292497-29295440 FORWARD LENGTH=460	1517.03	476.192	535.213	400.072	487.288	290.496	645.092	704.008	301.686	699.76	482.692	535.999	-3.18575	-2.83444	-3.79189	-3.11321	-5.22221	1.09133	-2.13829	1.08474	-1.33645	-1.20353
Bra011611	AT4G35380.1	Symbols: | SEC7-like guanine nucleotide exchange family protein | chr4:16819883-16825960 FORWARD LENGTH=1706	881.942	334.284	324.151	313.333	318.044	223.463	728.294	420.997	362.367	560.926	410.858	533.089	-2.6383	-2.72078	-2.81471	-2.77302	-3.9467	-1.72993	-2.00982	-1.29838	-1.77262	-1.36618
Bra001397	AT3G11320.1	Symbols: | Nucleotide-sugar transporter family protein | chr3:3547017-3548539 REVERSE LENGTH=308	4474.65	1984.14	1766.49	1812.15	1594.18	1883.38	4431.41	2584.47	2119.7	2696.17	2324.58	2220.51	-2.25521	-2.53307	-2.46925	-2.80687	-2.37586	-1.71463	-2.09058	-1.64359	-1.90633	-1.99567
Bra005977	AT5G08200.1	Symbols: | peptidoglycan-binding LysM domain-containing protein | chr5:2638385-2640508 FORWARD LENGTH=409	3756.53	1822.41	1591.6	1736.72	1873.16	1500.67	3733.97	2480.29	1777.09	2263.95	1904.17	1942.22	-2.0613	-2.36022	-2.163	-2.00545	-2.50324	-1.50546	-2.10117	-1.64932	-1.96094	-1.92253
Bra003770	AT1G57610.1	Symbols: | Protein of unknown function (DUF607) | chr1:21337449-21338412 REVERSE LENGTH=293	912.534	427.788	416.999	410.092	248.82	262.349	1292.09	917.239	633.959	766.593	667.253	723.816	-2.13315	-2.18834	-2.22519	-3.66745	-3.47832	-1.40867	-2.03813	-1.6855	-1.93643	-1.78511
Bra035230	AT4G11370.1	Symbols: RHA1A | RING-H2 finger A1A | chr4:6907777-6908256 FORWARD LENGTH=159	5850.59	2908.95	2849.58	2183.38	2303.23	2006.26	5741.64	3143.13	2399.11	3441.06	3001.17	3429.6	-2.01124	-2.05314	-2.6796	-2.54017	-2.91617	-1.82673	-2.39324	-1.66857	-1.91313	-1.67414
Bra038199	AT5G20885.1	Symbols: | RING/U-box superfamily protein | chr5:7084133-7084663 REVERSE LENGTH=176	616.249	386.294	295.146	322.865	325.174	311.544	553.174	305.455	247.627	279.544	277.803	437.197	-1.59528	-2.08795	-1.90869	-1.89514	-1.97805	-1.81098	-2.2339	-1.97884	-1.99125	-1.26527
Bra006551	AT5G20270.1	Symbols: HHP1 | heptahelical transmembrane protein1 | chr5:6841025-6842656 REVERSE LENGTH=332	2241.29	1336.36	1100.35	1750.32	1363.86	1973.22	1414.24	1119.74	655.404	921.849	710.59	1223.79	-1.67716	-2.03689	-1.2805	-1.64334	-1.13585	-1.26301	-2.15781	-1.53413	-1.99023	-1.15562
Bra035161	AT1G80690.1	Symbols: | PPPDE putative thiol peptidase family protein | chr1:30329283-30330524 REVERSE LENGTH=227	659.377	345.94	299.352	269.827	260.324	342.128	883.005	668.064	407.349	520.471	517.454	532.678	-1.90604	-2.20268	-2.4437	-2.53291	-1.92728	-1.32174	-2.16769	-1.69655	-1.70644	-1.65767
Bra025326	AT3G28345.1	Symbols: | ABC transporter family protein | chr3:10593921-10598775 REVERSE LENGTH=1240	1800.6	933.851	543.896	449.701	478.372	523.82	867.505	482.535	381.387	446.193	523.358	516.506	-1.92814	-3.31056	-4.00399	-3.76402	-3.43744	-1.79781	-2.27461	-1.94424	-1.65757	-1.67956
Bra011359	AT4G32600.1	Symbols: | RING/U-box superfamily protein | chr4:15724010-15725737 FORWARD LENGTH=453	3041.05	1742.62	995.145	1054.48	789.971	867.085	2332.5	1407.52	1040.01	1281.19	1282.85	1169.58	-1.7451	-3.05589	-2.88393	-3.84957	-3.50721	-1.65717	-2.24277	-1.82057	-1.81822	-1.99431
Bra036095	NA	NA	1238.13	636.959	459.293	425.977	393.934	287.644	736.072	410.479	302.895	397.125	395.599	464.892	-1.94381	-2.69573	-2.90657	-3.14299	-4.30438	-1.7932	-2.43012	-1.8535	-1.86065	-1.58332
Bra013552	AT4G21740.1	Symbols: | unknown protein; BEST Arabidopsis thaliana protein match is: unknown protein (TAIR:AT1G30515.1); Has 20 Blast hits to 20 proteins in 4 species: Archae - 0; Bacteria - 0; Metazoa - 0; Fungi - 0; Plants - 20; Viruses - 0; Other Eukaryotes - 0 (source: NCBI BLink). | chr4:11545926-11546396 FORWARD LENGTH=156	1191.78	724.221	510.008	520.414	348.976	395.896	994.661	708.827	481.45	640.83	534.118	624.516	-1.6456	-2.33679	-2.29006	-3.41508	-3.01034	-1.40325	-2.06597	-1.55214	-1.86225	-1.59269
Bra017879	AT4G39780.1	Symbols: | Integrase-type DNA-binding superfamily protein | chr4:18458216-18459034 REVERSE LENGTH=272	614.204	440.14	281.384	240.698	212.436	302.405	606.296	501.099	270.197	442.019	434.145	344.623	-1.39547	-2.1828	-2.55176	-2.89124	-2.03106	-1.20993	-2.2439	-1.37165	-1.39653	-1.7593
Bra021317	AT1G61730.1	Symbols: | DNA-binding storekeeper protein-related transcriptional regulator | chr1:22793447-22794577 REVERSE LENGTH=376	1158.85	622.914	640.432	565.228	714.386	637.641	1413.06	783.913	656.644	955.673	863.372	736.664	-1.86037	-1.80948	-2.05023	-1.62216	-1.8174	-1.80257	-2.15194	-1.4786	-1.63668	-1.91819
Bra011033	AT4G28490.1	Symbols: RLK5, HAE | Leucine-rich receptor-like protein kinase family protein | chr4:14077894-14080965 FORWARD LENGTH=999	800.831	474.924	405.396	361.53	367.043	353.986	816.021	490.542	377.175	651.667	643.867	811.479	-1.68623	-1.97543	-2.21512	-2.18185	-2.26232	-1.66351	-2.16351	-1.25221	-1.26738	-1.0056
Bra021693	AT2G40450.1	Symbols: | BTB/POZ domain-containing protein | chr2:16892024-16892790 REVERSE LENGTH=209	853.424	663.35	492.53	742.293	343.446	560.748	768.69	680.013	206.352	547.824	568.784	965.266	-1.28654	-1.73274	-1.14971	-2.48489	-1.52194	-1.1304	-3.72514	-1.40317	-1.35146	1.25573
Bra021018	AT4G18210.1	Symbols: ATPUP10, PUP10 | purine permease 10 | chr4:10076175-10077495 FORWARD LENGTH=390	1515.76	1539.12	1273.97	1232.22	648.667	864.674	866.136	685.405	364.128	766.683	691.354	543.402	1.01541	-1.18979	-1.23011	-2.33673	-1.75298	-1.26368	-2.37866	-1.12972	-1.25281	-1.59391
Bra038521	NA	NA	25766.1	14708.7	14514.3	13848.5	11733.2	14354.2	24666.6	14805.6	11346	15356.2	12656.5	14526.1	-1.75176	-1.77522	-1.86057	-2.196	-1.79502	-1.66603	-2.17403	-1.6063	-1.94893	-1.69809
Bra035992	AT5G43760.1	Symbols: KCS20 | 3-ketoacyl-CoA synthase 20 | chr5:17585903-17588486 FORWARD LENGTH=529	6119.78	4455.38	3151.75	4092.35	2953.15	3326.5	4393.14	2504.46	2146.59	2757.4	2383.57	2593.65	-1.37357	-1.94171	-1.49542	-2.07229	-1.83971	-1.75413	-2.04657	-1.59322	-1.84309	-1.69381
Bra000625	AT5G50375.1	Symbols: CPI1 | cyclopropyl isomerase | chr5:20511856-20513931 FORWARD LENGTH=280	575.39	594.914	405.99	438.452	284.949	335.465	884.386	723.507	438.08	563.43	480.896	635.664	1.03393	-1.41725	-1.31232	-2.01927	-1.7152	-1.22236	-2.01878	-1.56965	-1.83904	-1.39128
Bra015403	AT1G05240.1	Symbols: | Peroxidase superfamily protein | chr1:1521202-1522447 FORWARD LENGTH=325	2974.74	2388.51	1771.68	1983.27	1428.16	1731.96	1984.29	1842.01	989.085	1658.91	1062.18	1315.98	-1.24544	-1.67905	-1.49992	-2.08292	-1.71756	-1.07724	-2.00619	-1.19614	-1.86813	-1.50784
Bra028166	AT5G38130.1	Symbols: | HXXXD-type acyl-transferase family protein | chr5:15217956-15219344 REVERSE LENGTH=462	914.099	970.544	581.671	509.524	397.23	226.812	899.447	861.414	430.322	614.969	467.182	486.645	1.06175	-1.57151	-1.79403	-2.30118	-4.03021	-1.04415	-2.09017	-1.46259	-1.92526	-1.84826
Bra027090	AT1G61350.1	Symbols: | ARM repeat superfamily protein | chr1:22634099-22635820 FORWARD LENGTH=573	1791.02	951.284	907.579	909.026	730.987	586.748	1103.58	727.811	539.692	648.923	635.016	570.978	-1.88274	-1.9734	-1.97026	-2.45014	-3.05245	-1.5163	-2.04483	-1.70063	-1.73788	-1.93279
Bra014636	AT3G57260.1	Symbols: BGL2, PR2, BG2, PR-2 | beta-1,3-glucanase 2 | chr3:21188709-21189822 REVERSE LENGTH=339	2324.78	1961.65	2151.58	1575.7	1598.78	852.265	7301.68	4441.36	3073.89	4344.97	3779.84	3899.04	-1.18511	-1.0805	-1.4754	-1.4541	-2.72777	-1.64402	-2.37539	-1.68049	-1.93174	-1.87269
Bra026549	AT2G03480.1	Symbols: QUL2 | QUASIMODO2 LIKE 2 | chr2:1051509-1054090 FORWARD LENGTH=606	3503.06	2954.72	2410.84	2457.07	1985.47	1717.98	4595.7	2513.87	2073.19	2455.09	2473.09	2872.83	-1.18558	-1.45305	-1.42571	-1.76435	-2.03906	-1.82814	-2.21673	-1.87191	-1.85828	-1.59971
Bra034866	AT3G11100.1	Symbols: | sequence-specific DNA binding transcription factors | chr3:3476490-3477320 REVERSE LENGTH=249	2682.83	1520.89	1392.1	1433.28	1727.56	1337.16	1477.46	1404.43	676.266	1053.71	870.785	1374.06	-1.76399	-1.92718	-1.87181	-1.55296	-2.00636	-1.052	-2.18473	-1.40215	-1.6967	-1.07525
Bra001813	AT1G51550.1	Symbols: | Kelch repeat-containing F-box family protein | chr1:19117646-19119291 REVERSE LENGTH=478	601.681	353.436	465.921	384.863	418.356	284.626	1121.87	711.591	527.825	813.564	579.738	711.529	-1.70238	-1.29138	-1.56336	-1.4382	-2.11394	-1.57657	-2.12546	-1.37896	-1.93513	-1.5767
Bra012714	AT4G16480.1	Symbols: ATINT4, INT4 | inositol transporter 4 | chr4:9291246-9293083 FORWARD LENGTH=582	5630.27	3845.99	3234.7	3023.68	2928.67	2461.91	5830.59	5083.41	2908.59	3734.67	3389.71	3389.27	-1.46393	-1.74058	-1.86206	-1.92247	-2.28695	-1.14698	-2.00461	-1.56121	-1.72009	-1.72031
Bra032955	AT5G14030.1	Symbols: | translocon-associated protein beta (TRAPB) family protein | chr5:4526878-4528253 FORWARD LENGTH=195	240.781	189.627	199.738	172.859	223.868	151.704	537.055	356.509	79.9362	376.284	894.054	593.043	1	1	1	1	1	-1.50643	-6.71855	-1.42726	1.66473	1.10425
Bra001881	AT3G22670.1	Symbols: | Pentatricopeptide repeat (PPR) superfamily protein | chr3:8017771-8019459 REVERSE LENGTH=562	489.002	380.01	383.602	272.396	318.005	290.943	583.875	351.729	177.687	423.062	533.357	576.321	1	1	1	1	1	-1.66001	-3.28597	-1.38012	-1.09472	-1.01311
Bra041086	AT3G43250.1	Symbols: | Family of unknown function (DUF572) | chr3:15216713-15217462 FORWARD LENGTH=249	278.284	257.895	674.007	281.284	202.433	692.125	551.709	409.432	176.999	457.973	1402.39	767.274	1	2.42201	1	1	2.48712	-1.3475	-3.11702	-1.20468	2.5419	1.39072
Bra011620	NA	NA	1426.42	1153.92	990.83	904.844	1043.55	804.053	580.931	345.385	195.764	387.76	711.855	582.359	-1.23615	-1.43962	-1.57643	-1.36689	-1.77404	-1.68198	-2.96751	-1.49817	1.22537	1.00246
Bra014492	AT3G60380.1	Symbols: | FUNCTIONS IN: molecular_function unknown; INVOLVED IN: biological_process unknown; LOCATED IN: cellular_component unknown; EXPRESSED IN: 24 plant structures; EXPRESSED DURING: 13 growth stages; BEST Arabidopsis thaliana protein match is: hydroxyproline-rich glycoprotein family protein (TAIR:AT4G16790.1); Has 6102 Blast hits to 3981 proteins in 424 species: Archae - 6; Bacteria - 372; M…	1545.63	869.516	535.26	848.376	632.626	1133.59	533.268	361.079	245.451	354.435	349.544	295.537	-1.77758	-2.88762	-1.82187	-2.4432	-1.36348	-1.47687	-2.1726	-1.50456	-1.52561	-1.8044
Bra019024	AT4G27840.1	Symbols: | SNARE-like superfamily protein | chr4:13865268-13866050 REVERSE LENGTH=260	1535.36	895.739	799.48	1034.29	1178.42	2378.64	987.822	575.145	351.017	622.563	700.47	880.563	-1.71407	-1.92045	-1.48446	-1.3029	1.54924	-1.71752	-2.81417	-1.5867	-1.41023	-1.12181
Bra019787	NA	NA	529.749	335.65	350.234	284.765	370.142	501.555	692.139	478.94	262.846	434.535	391.683	459.101	-1.57828	-1.51256	-1.8603	-1.4312	-1.05621	-1.44515	-2.63325	-1.59283	-1.76709	-1.5076
Bra039263	AT2G46700.1	Symbols: ATCRK3, CRK3 | CDPK-related kinase 3 | chr2:19182968-19186430 REVERSE LENGTH=595	1807.09	2261.61	1842.25	1550.75	2234.72	1931.16	2094.41	1783.66	798.331	1403.65	1214.63	1353.43	1.25152	1.01946	-1.1653	1.23664	1.06866	-1.17422	-2.62349	-1.49212	-1.72432	-1.54748
Bra024169	NA	NA	2776.88	1433.47	1070.81	1953.08	1304	2034.22	1813.59	934.863	857.775	944.888	1051.55	945.329	-1.93717	-2.59325	-1.4218	-2.12951	-1.36508	-1.93995	-2.1143	-1.91937	-1.72468	-1.91847
Bra014080	AT1G47480.1	Symbols: | alpha/beta-Hydrolases superfamily protein | chr1:17417623-17419296 FORWARD LENGTH=314	435.801	547.856	553.453	247.674	304.832	357.007	501.455	527.701	200.951	416.492	343.341	429.952	1.25712	1.26997	1	1	1	1.05234	-2.49541	-1.204	-1.46052	-1.1663
Bra003933	AT1G71220.1	Symbols: EBS1, UGGT, PSL2 | UDP-glucose:glycoprotein glucosyltransferases;transferases, transferring hexosyl groups;transferases, transferring glycosyl groups | chr1:26841664-26851730 FORWARD LENGTH=1613	139.271	246.417	370.377	307.617	387.331	369.71	546.492	300.7	224.108	322.793	406.625	323.256	1	1	1	1	1	-1.8174	-2.43852	-1.69301	-1.34397	-1.69059
Bra014773	AT3G55130.1	Symbols: ATWBC19, WBC19 | white-brown complex homolog 19 | chr3:20434111-20436288 REVERSE LENGTH=725	656.478	1151.37	706.306	1034.07	835.477	1128.35	745.247	623.002	306.331	562.56	542.453	980.07	1.75386	1.0759	1.57518	1.27267	1.71879	-1.19622	-2.43282	-1.32474	-1.37385	1.31509
Bra037743	AT2G43000.1	Symbols: anac042, NAC042 | NAC domain containing protein 42 | chr2:17880617-17882584 REVERSE LENGTH=275	588.819	280.99	251.293	247.347	403.489	197.79	503.679	332.434	250.915	367.71	470.112	688.21	-2.09552	-2.34316	-2.38054	-1.45932	-2.97699	-1.51512	-2.00737	-1.36977	-1.0714	1.36637
Bra003731	NA	NA	1192.99	621.21	514.082	636.683	596.155	655.904	1155.71	658.59	519.868	800.961	816.115	833.533	-1.92043	-2.32062	-1.87376	-2.00114	-1.81885	-1.75482	-2.22308	-1.4429	-1.41611	-1.38652
Bra011951	AT2G28410.1	Symbols: | unknown protein; Has 18 Blast hits to 18 proteins in 5 species: Archae - 0; Bacteria - 0; Metazoa - 0; Fungi - 0; Plants - 18; Viruses - 0; Other Eukaryotes - 0 (source: NCBI BLink). | chr2:12156202-12156549 FORWARD LENGTH=115	634.91	463.647	393.488	700.078	423.299	790.822	928.783	522.95	399.71	520.414	527.942	472.932	-1.36938	-1.61354	1.10264	-1.49991	1.24557	-1.77605	-2.32364	-1.7847	-1.75925	-1.96388
Bra039399	AT3G13480.1	Symbols: | unknown protein; FUNCTIONS IN: molecular_function unknown; INVOLVED IN: biological_process unknown; LOCATED IN: endomembrane system; EXPRESSED IN: 23 plant structures; EXPRESSED DURING: 13 growth stages; BEST Arabidopsis thaliana protein match is: unknown protein (TAIR:AT1G55475.1); Has 30201 Blast hits to 17322 proteins in 780 species: Archae - 12; Bacteria - 1396; Metazoa - 17338; Fu…	5352.23	2415.4	2329.89	2742.76	2745.74	2482.83	5465.5	2994.97	2691.1	3149.26	3186.95	3346.18	-2.21588	-2.2972	-1.9514	-1.94929	-2.1557	-1.82489	-2.03095	-1.73549	-1.71496	-1.63336
Bra034377	AT2G27920.1	Symbols: SCPL51 | serine carboxypeptidase-like 51 | chr2:11885777-11889043 REVERSE LENGTH=461	4736.09	4035.63	3022.33	3253.52	2929.99	3211.04	5493.53	3749.18	2398.34	2825.56	2932.78	3476.95	-1.17357	-1.56703	-1.45568	-1.61642	-1.47494	-1.46526	-2.29056	-1.94423	-1.87315	-1.57999
Bra009740	AT5G24170.1	Symbols: | Got1/Sft2-like vescicle transport protein family | chr5:8189744-8191355 REVERSE LENGTH=163	2537.53	1694.34	1297.5	1602.12	1416.41	1570.12	3018.07	2103.63	1327.28	1918.29	1531.53	1960.52	-1.49765	-1.95571	-1.58386	-1.79152	-1.61614	-1.4347	-2.27388	-1.57331	-1.97062	-1.53942
Bra006583	AT5G20885.1	Symbols: | RING/U-box superfamily protein | chr5:7084133-7084663 REVERSE LENGTH=176	646.331	490.672	288.017	361.033	389.259	263.21	830.042	535.841	379.997	450.386	443.968	456.059	-1.31724	-2.24407	-1.79023	-1.66041	-2.45557	-1.54905	-2.18434	-1.84296	-1.8696	-1.82003
Bra000481	AT1G07660.1	Symbols: | Histone superfamily protein | chr1:2369212-2369523 FORWARD LENGTH=103	2191.35	1618.7	2134.67	1790.08	1712.61	1509.14	3164.4	2095.42	1441.88	1947.95	1838.13	1792.64	-1.35377	-1.02655	-1.22416	-1.27954	-1.45205	-1.51015	-2.19463	-1.62448	-1.72153	-1.76522
Bra027976	AT5G42320.1	Symbols: | Zn-dependent exopeptidases superfamily protein | chr5:16918651-16920845 REVERSE LENGTH=379	1449.21	797.966	664.96	719.623	809.79	517.648	722.451	507.867	359.441	469.646	421.435	465.061	-1.81613	-2.17939	-2.01385	-1.78961	-2.79961	-1.42252	-2.00993	-1.53829	-1.71426	-1.55345
Bra033226	AT1G01900.1	Symbols: ATSBT1.1, SBTI1.1 | subtilase family protein | chr1:310332-313011 FORWARD LENGTH=774	3497.08	2501.42	2464.84	2763.41	3172.09	3683.15	1550.5	1048.03	717.115	1020.47	854.998	997.027	-1.39804	-1.41879	-1.26549	-1.10245	1.05321	-1.47944	-2.16214	-1.5194	-1.81345	-1.55512
Bra039423	NA	NA	286.796	219.071	242.017	212.061	182.655	283.253	629.061	329.864	292.039	347.182	1028.35	555.84	1	1	1	1	1	-1.90703	-2.15403	-1.81191	1.63474	-1.13173
Bra013776	AT4G24210.1	Symbols: SLY1 | F-box family protein | chr4:12563658-12564113 FORWARD LENGTH=151	8630.42	6104.57	5770.03	5862.14	6851.37	6387	2406.65	1687.5	1123.1	1271.08	1296.12	1222.15	-1.41376	-1.49573	-1.47223	-1.25966	-1.35125	-1.42616	-2.14286	-1.89339	-1.85681	-1.96919
Bra011248	AT4G31130.1	Symbols: | Protein of unknown function (DUF1218) | chr4:15137159-15138465 REVERSE LENGTH=195	7292.96	4673.94	3715.04	3928.2	3812.87	3820.59	8614.07	5232.17	4038.81	5265.04	4913.69	5441.76	-1.56035	-1.96309	-1.85657	-1.91272	-1.90886	-1.64637	-2.13282	-1.63609	-1.75308	-1.58296
Bra008833	AT5G13360.1	Symbols: | Auxin-responsive GH3 family protein | chr5:4283805-4286120 FORWARD LENGTH=594	2636.98	2118.61	1908.93	1912.49	1581.43	1883.6	4098.26	2502.71	1925.6	2205.67	2383.97	2472.29	-1.24467	-1.38139	-1.37882	-1.66747	-1.39997	-1.63753	-2.1283	-1.85806	-1.71909	-1.65768
Bra025848	AT1G20840.1	Symbols: TMT1 | tonoplast monosaccharide transporter1 | chr1:7245107-7247674 REVERSE LENGTH=734	2144.67	1485.63	1275.48	1797.31	1385.7	2250.06	1851.81	1159.11	873.65	1086.34	1509.33	1747.62	-1.44361	-1.68146	-1.19327	-1.54772	1.04914	-1.59761	-2.11962	-1.70463	-1.22691	-1.05962
Bra019457	AT3G44330.1	Symbols: | INVOLVED IN: protein processing; LOCATED IN: mitochondrion, endoplasmic reticulum, plasma membrane, vacuole; EXPRESSED IN: 25 plant structures; EXPRESSED DURING: 13 growth stages; CONTAINS InterPro DOMAIN/s: Nicalin (InterPro:IPR016574), EF-Hand 1, calcium-binding site (InterPro:IPR018247), Nicastrin (InterPro:IPR008710); Has 245 Blast hits to 243 proteins in 99 species: Archae - 6; Ba…	1993.82	1069.66	939.797	1007.22	888.933	902.22	2209.6	1385.03	988.988	1391.56	1271.36	1185.38	-1.86398	-2.12154	-1.97953	-2.24294	-2.2099	-1.59534	-2.2342	-1.58786	-1.73798	-1.86404
Bra000454	AT2G47470.1	Symbols: ATPDIL2-1, UNE5, MEE30, PDI11, ATPDI11 | thioredoxin family protein | chr2:19481503-19483683 FORWARD LENGTH=361	6143.67	4179.36	3644.9	3927.08	3420.89	3638.82	8004.7	4684.28	3815.5	4449.65	4353.33	5233.34	-1.47	-1.68555	-1.56444	-1.79593	-1.68837	-1.70884	-2.09794	-1.79895	-1.83875	-1.52956
Bra025181	AT3G26090.1	Symbols: RGS1, ATRGS1 | G-protein coupled receptors;GTPase activators | chr3:9532883-9535410 FORWARD LENGTH=459	977.945	498.345	464.592	453.671	578.169	325.123	899.481	738.637	358.29	686.85	608.748	568.063	-1.96239	-2.10495	-2.15563	-1.69145	-3.00792	-1.21776	-2.51048	-1.30957	-1.47759	-1.58342
Bra039330	AT2G45550.1	Symbols: CYP76C4 | cytochrome P450, family 76, subfamily C, polypeptide 4 | chr2:18773541-18775654 REVERSE LENGTH=511	1918.85	1298.13	1254.45	941.332	1339.72	905.174	3697.69	2150.64	1773.27	2178.14	1998.4	1970.27	-1.47816	-1.52963	-2.03844	-1.43228	-2.11987	-1.71934	-2.08524	-1.69764	-1.85033	-1.87674
Bra016163	AT1G71040.1	Symbols: LPR2 | Cupredoxin superfamily protein | chr1:26797201-26800224 REVERSE LENGTH=581	3900.89	2661.37	2913.82	2393.46	2215.27	2220.91	5047.84	3030.46	2423.64	3002.58	2689.11	2675.73	-1.46575	-1.33875	-1.62981	-1.76091	-1.75644	-1.6657	-2.08275	-1.68117	-1.87714	-1.88653
Bra004467	AT2G47240.1	Symbols: CER8, LACS1 | AMP-dependent synthetase and ligase family protein | chr2:19393835-19397616 FORWARD LENGTH=660	2066.86	813.812	1090.26	934.314	850.192	568.387	1133.81	848.774	545.246	782.684	960.19	1030.66	-2.53973	-1.89575	-2.21217	-2.43105	-3.63636	-1.33582	-2.07945	-1.44862	-1.18082	-1.10008
Bra013315	AT5G05490.2	Symbols: SYN1, DIF1 | Rad21/Rec8-like family protein | chr5:1624712-1629144 FORWARD LENGTH=617	467.522	546.223	623.553	581.951	525.768	540.732	1016.2	539.957	488.896	717.378	609.874	537.017	1.16834	1.33374	1.24476	1.12458	1.15659	-1.882	-2.07856	-1.41655	-1.66625	-1.89231
Bra015021	AT3G23950.1	Symbols: | F-box family protein | chr3:8652908-8654164 REVERSE LENGTH=418	3829.15	2284.07	2017.42	2313.24	2064.95	2141.69	3989.35	2792.77	1925.01	2974.5	2084.55	2659.8	-1.67646	-1.89804	-1.65532	-1.85435	-1.78791	-1.42846	-2.07238	-1.34118	-1.91377	-1.49987
Bra002764	AT5G57070.1	Symbols: | hydroxyproline-rich glycoprotein family protein | chr5:23096221-23097948 FORWARD LENGTH=575	4512.33	4439.02	2931.13	3518.3	2968.11	3939.35	5479.6	3280.33	2656.21	3208.03	2775.61	4047.28	-1.01651	-1.53945	-1.28253	-1.52027	-1.14545	-1.67044	-2.06294	-1.70809	-1.9742	-1.3539
Bra040582	AT5G23960.1	Symbols: ATTPS21, TPS21 | terpene synthase 21 | chr5:8092969-8095128 FORWARD LENGTH=547	8880.03	11128.1	11729.1	11915.5	9196.21	11770.2	580.603	657.973	281.581	363.745	443.354	626.415	1.25316	1.32084	1.34183	1.03561	1.32547	1.13326	-2.06194	-1.59618	-1.30957	1.0789
Bra014462	AT2G45570.1	Symbols: CYP76C2 | cytochrome P450, family 76, subfamily C, polypeptide 2 | chr2:18779935-18781922 REVERSE LENGTH=512	437.416	309.638	464.784	279.611	219.658	470.331	772.808	454.599	375.011	435.359	1144.03	714.1	1	1	1	1	1	-1.69998	-2.06076	-1.77511	1.48035	-1.08221
Bra012697	AT4G16650.1	Symbols: | O-fucosyltransferase family protein | chr4:9372727-9375910 FORWARD LENGTH=549	680.489	649.924	576.544	708.395	641.46	736.761	1659.31	1088.78	806.056	1055.36	879.377	1216.31	-1.04703	-1.18029	1.04101	-1.06084	1.08269	-1.52401	-2.05855	-1.57227	-1.88692	-1.36422
Bra033853	AT1G32120.1	Symbols: | FUNCTIONS IN: molecular_function unknown; INVOLVED IN: biological_process unknown; LOCATED IN: membrane; EXPRESSED IN: 14 plant structures; EXPRESSED DURING: 4 anthesis, C globular stage, F mature embryo stage, petal differentiation and expansion stage, E expanded cotyledon stage; CONTAINS InterPro DOMAIN/s: Aminotransferase-like, plant mobile domain (InterPro:IPR019557), Protein of un…	1760.84	882.787	854.152	925.073	791.526	1475.67	768.46	458.516	345.479	571.311	529.609	625.118	-1.99464	-2.06151	-1.90346	-2.22461	-1.19325	-1.67597	-2.22433	-1.34508	-1.45099	-1.2293
Bra036546	AT5G25610.1	Symbols: RD22, ATRD22 | BURP domain-containing protein | chr5:8914498-8916684 REVERSE LENGTH=392	8686.31	5531.81	5607.45	6072.55	5229.03	7071.59	6204.61	5408.07	3039.05	5766.2	3964.57	5191.12	-1.57025	-1.54907	-1.43042	-1.66117	-1.22834	-1.14729	-2.04163	-1.07603	-1.56501	-1.19524
Bra003609	AT1G79490.1	Symbols: EMB2217 | Pentatricopeptide repeat (PPR) superfamily protein | chr1:29900617-29903127 FORWARD LENGTH=836	868.839	436.248	455.452	447.865	584.606	443.146	984.935	582.356	483.436	832.663	675.639	834.738	-1.99162	-1.90764	-1.93996	-1.4862	-1.96062	-1.69129	-2.03736	-1.18287	-1.45778	-1.17993
Bra009875	AT5G26010.1	Symbols: | Protein phosphatase 2C family protein | chr5:9085512-9087372 REVERSE LENGTH=331	302.748	45.5792	90.8381	71.6455	104.496	120.585	891.38	691.968	437.645	635.14	461.989	487.691	1	1	1	1	1	-1.28818	-2.03676	-1.40344	-1.92944	-1.82776
Bra000820	AT4G03560.1	Symbols: ATTPC1, TPC1, ATCCH1, FOU2 | two-pore channel 1 | chr4:1580253-1585691 FORWARD LENGTH=733	777.563	765.643	538.838	654.341	511.869	553.752	1020.91	675.5	505.752	689.374	578.302	658.23	-1.01557	-1.44304	-1.18831	-1.51907	-1.40417	-1.51134	-2.0186	-1.48092	-1.76536	-1.55099
Bra035411	NA	NA	567.456	624.474	414.237	470.331	405.368	465.284	761.075	634.489	377.283	396.643	398.608	464.087	1.10048	-1.36988	-1.2065	-1.39985	-1.21959	-1.19951	-2.01725	-1.91879	-1.90933	-1.63994
Bra040151	AT3G04080.1	Symbols: ATAPY1, APY1 | apyrase 1 | chr3:1068068-1070917 REVERSE LENGTH=471	2611.29	1399.23	1489.78	1279.35	1369.16	1184.19	3182.93	2103.39	1578.25	1827.03	1710.34	1620.58	-1.86623	-1.7528	-2.04111	-1.90722	-2.20513	-1.51324	-2.01675	-1.74213	-1.86099	-1.96407
Bra027643	NA	NA	287.697	350.983	364.853	294.938	306.535	226.175	513.846	326.776	254.867	260.795	399.072	276.382	1	1	1	1	1	-1.57247	-2.01613	-1.97031	-1.2876	-1.85919
Bra036351	AT3G26030.1	Symbols: ATB' DELTA | serine/threonine protein phosphatase 2A 55 kDa regulatory subunit B prime delta | chr3:9517741-9519260 FORWARD LENGTH=477	5488.65	4595.63	3686.95	4031.35	3934.63	3589	6753.09	4900.53	3352.47	4265.28	4193.86	3783.72	-1.19432	-1.48867	-1.36149	-1.39496	-1.5293	-1.37803	-2.01436	-1.58327	-1.61023	-1.78478
Bra031811	AT5G66280.1	Symbols: GMD1 | GDP-D-mannose 4,6-dehydratase 1 | chr5:26476434-26477519 FORWARD LENGTH=361	1571.92	1605.7	1494.32	1717.9	1437.32	1671.64	3458.85	2181.01	1719.85	1917.28	1782.68	1998.78	1.02149	-1.05193	1.09287	-1.09365	1.06344	-1.58589	-2.01113	-1.80404	-1.94025	-1.73048
Bra040012	AT3G10260.1	Symbols: | Reticulon family protein | chr3:3171413-3172508 REVERSE LENGTH=247	6746.53	5060.8	4844.1	5127.63	4829.43	5509.88	7857.22	4708.22	3910.18	4510.72	4420.49	5103.93	-1.3331	-1.39273	-1.31572	-1.39696	-1.22444	-1.66883	-2.00943	-1.7419	-1.77745	-1.53945
Bra012767	AT4G15760.1	Symbols: MO1 | monooxygenase 1 | chr4:8972785-8974548 REVERSE LENGTH=422	5245.56	4414.14	3633.92	3915.89	3884.54	3515.05	968.222	626.585	482.941	1134.11	963.06	664.374	-1.18835	-1.4435	-1.33956	-1.35037	-1.49231	-1.54524	-2.00485	1.17133	-1.00536	-1.45734
Bra006571	AT5G20680.1	Symbols: TBL16 | TRICHOME BIREFRINGENCE-LIKE 16 | chr5:6998946-7001596 FORWARD LENGTH=551	2068.36	917.598	1051.84	977.098	1042.63	1058.59	2079.83	1140.14	1038.01	1182.93	1106.07	1402.22	-2.2541	-1.96642	-2.11684	-1.98379	-1.95388	-1.82419	-2.00367	-1.7582	-1.88038	-1.48324
Bra021260	AT2G17310.1	Symbols: SON1 | F-box and associated interaction domains-containing protein | chr2:7531212-7532324 FORWARD LENGTH=370	1083.52	407.352	416.963	444.322	647.563	656.107	956.024	812.368	413.229	462.277	867.995	636.027	-2.65991	-2.5986	-2.43859	-1.67323	-1.65144	-1.17684	-2.31355	-2.06808	-1.10142	-1.50312
Bra029093	AT5G53160.2	Symbols: RCAR3, PYL8 | regulatory components of ABA receptor 3 | chr5:21561026-21561953 FORWARD LENGTH=188	4829	2056.46	1879.59	1799.62	2187.48	2789.34	1957.22	1092.49	799.401	875.992	995.96	1040.85	-2.34821	-2.56918	-2.68334	-2.20756	-1.73123	-1.79152	-2.44836	-2.23429	-1.96516	-1.88041
Bra000018	AT2G37770.2	Symbols: | NAD(P)-linked oxidoreductase superfamily protein | chr2:15834888-15836659 FORWARD LENGTH=315	1661.08	764.849	526.331	647.563	753.136	832.924	1237.57	634.37	443.702	482.669	722.219	755.494	-2.17178	-3.15596	-2.56512	-2.20555	-1.99428	-1.95086	-2.78919	-2.56401	-1.71357	-1.63809
Bra020928	AT4G20270.1	Symbols: BAM3 | Leucine-rich receptor-like protein kinase family protein | chr4:10949822-10952924 FORWARD LENGTH=992	895.682	295.887	412.628	96.0428	215.532	139.342	501.219	267.95	122.103	172.443	324.925	533.877	-3.02711	-2.17068	-9.32586	-4.15568	-6.42794	-1.87057	-4.10489	-2.90658	-1.54257	1.06516
Bra020094	AT5G20250.4	Symbols: DIN10 | Raffinose synthase family protein | chr5:6833730-6836635 FORWARD LENGTH=844	6132.54	2144.87	1920.39	963.538	1059.91	404.02	533.274	501.754	220.595	163.794	568.25	384.886	-2.85917	-3.19338	-6.36461	-5.78591	-15.1788	-1.06282	-2.41743	-3.25576	1.06559	-1.38554
Bra024408	AT5G65683.1	Symbols: | Zinc finger (C3HC4-type RING finger) family protein | chr5:26261472-26263704 FORWARD LENGTH=717	1228.43	474.682	364.304	322.826	392.932	352.258	729.358	849.877	173.117	320.473	372.943	506.312	-2.5879	-3.37199	-3.80524	-3.12632	-3.4873	1.16524	-4.21309	-2.27588	-1.95568	-1.44053
Bra002886	AT5G55620.1	Symbols: | unknown protein; BEST Arabidopsis thaliana protein match is: unknown protein (TAIR:AT3G09950.1); Has 30201 Blast hits to 17322 proteins in 780 species: Archae - 12; Bacteria - 1396; Metazoa - 17338; Fungi - 3422; Plants - 5037; Viruses - 0; Other Eukaryotes - 2996 (source: NCBI BLink). | chr5:22530373-22530678 FORWARD LENGTH=101	1351.92	376.024	334.765	356.479	369.162	405.146	789.502	434.064	377.182	336.885	496.119	623.26	-3.5953	-4.03842	-3.79243	-3.66213	-3.33687	-1.81886	-2.09316	-2.34354	-1.59136	-1.26673
Bra006462	AT5G18480.1	Symbols: PGSIP6 | plant glycogenin-like starch initiation protein 6 | chr5:6131307-6133787 REVERSE LENGTH=537	3247.07	1266.05	1065.79	905.864	636.221	797.691	2617.54	1354.65	1065.15	1265.97	1429.62	1544.68	-2.56472	-3.04663	-3.5845	-5.10368	-4.07059	-1.93226	-2.45744	-2.06762	-1.83093	-1.69455
Bra014244	AT1G50280.1	Symbols: | Phototropic-responsive NPH3 family protein | chr1:18623857-18626292 REVERSE LENGTH=525	1089.82	477.235	425.61	355.152	501.109	316.201	594.924	486.895	193.22	232.118	314.596	395.54	-2.28361	-2.56061	-3.0686	-2.17482	-3.44661	-1.22187	-3.079	-2.56302	-1.89107	-1.50408
Bra017771	AT4G36670.1	Symbols: | Major facilitator superfamily protein | chr4:17287680-17289483 REVERSE LENGTH=493	946.839	537.827	444.061	433.979	382.145	363.063	691.387	370.46	305.414	208.091	472.507	503.506	-1.76049	-2.13223	-2.18176	-2.4777	-2.60792	-1.86629	-2.26377	-3.32252	-1.46323	-1.37315
Bra034903	NA	NA	2527.86	3891.94	5746.6	5475.01	7155.48	7263.62	517.655	845.474	131.288	116.299	551.098	964.998	1.53962	2.27331	2.16587	2.83065	2.87343	1.63328	-3.9429	-4.45107	1.0646	1.86417
Bra039039	AT3G28917.1	Symbols: MIF2 | mini zinc finger 2 | chr3:10925014-10925316 FORWARD LENGTH=100	125.724	172.559	196.49	205.714	177.228	187.442	723.524	466.675	296.99	215.051	385.163	375.016	1	1	1	1	1	-1.55038	-2.43619	-3.36443	-1.87849	-1.92932
Bra005293	AT2G36210.1	Symbols: | SAUR-like auxin-responsive protein family | chr2:15186326-15186733 REVERSE LENGTH=135	330.325	272.138	261.978	199.117	193.533	242.852	793.315	545.426	246.191	236.873	1270.57	867.7	1	1	1	1	1	-1.45449	-3.22236	-3.34912	1.6016	1.09376
Bra026013	AT1G16950.1	Symbols: | unknown protein; FUNCTIONS IN: molecular_function unknown; INVOLVED IN: biological_process unknown; LOCATED IN: endomembrane system; EXPRESSED IN: stamen; EXPRESSED DURING: 4 anthesis; Has 17 Blast hits to 17 proteins in 5 species: Archae - 0; Bacteria - 0; Metazoa - 0; Fungi - 0; Plants - 17; Viruses - 0; Other Eukaryotes - 0 (source: NCBI BLink). | chr1:5796083-5796364 FORWARD LENGTH…	439.952	400.09	299.424	376.017	466.822	672.771	754.126	385.802	247.376	240.393	449.414	387.969	1	1	1	1	1.52919	-1.9547	-3.0485	-3.13705	-1.67802	-1.94378
Bra007050	AT3G54140.1	Symbols: ATPTR1, PTR1 | peptide transporter 1 | chr3:20045885-20048154 REVERSE LENGTH=570	2068.61	1549.79	1371.93	1119.07	1398.02	1357.85	2085.24	1251.71	900.571	747.076	1088.67	1163.65	-1.33477	-1.50781	-1.84851	-1.47967	-1.52345	-1.66591	-2.31546	-2.7912	-1.9154	-1.79198
Bra013515	AT4G21230.1	Symbols: CRK27 | cysteine-rich RLK (RECEPTOR-like protein kinase) 27 | chr4:11319244-11321679 REVERSE LENGTH=642	120.164	283.264	184.295	77.0563	177.113	400.916	614.617	943.96	117.5	234.626	358.823	564.229	1	1	1	1	1	1.53585	-5.23078	-2.61956	-1.71287	-1.0893
Bra011392	AT4G32880.1	Symbols: ATHB-8, ATHB8, HB-8 | homeobox gene 8 | chr4:15863587-15867822 REVERSE LENGTH=833	1472.58	1272.12	1148.54	1354.19	1012.65	799.155	657.61	412.275	297.072	257.338	703.515	360.563	-1.15758	-1.28213	-1.08742	-1.45418	-1.84267	-1.59508	-2.21364	-2.55543	1.06981	-1.82384
Bra012043	AT2G26790.1	Symbols: | Pentatricopeptide repeat (PPR) superfamily protein | chr2:11425270-11427669 REVERSE LENGTH=799	434.432	261.617	168.642	252.863	262.716	282.427	527.482	331.593	263.052	228.433	527.788	465.518	1	1	1	1	1	-1.59075	-2.00524	-2.30913	1.00058	-1.13311
Bra007827	AT2G24970.1	Symbols: | unknown protein; Has 33 Blast hits to 33 proteins in 17 species: Archae - 0; Bacteria - 0; Metazoa - 1; Fungi - 0; Plants - 28; Viruses - 0; Other Eukaryotes - 4 (source: NCBI BLink). | chr2:10620215-10621250 REVERSE LENGTH=152	578.498	298.351	419.44	323.616	442.813	362.813	738.849	626.785	343.182	335.768	375.618	448.986	-1.93898	-1.37922	-1.78761	-1.30642	-1.59448	-1.17879	-2.15294	-2.20047	-1.96702	-1.64559
Bra011540	AT4G34530.1	Symbols: CIB1 | cryptochrome-interacting basic-helix-loop-helix 1 | chr4:16498466-16499946 FORWARD LENGTH=335	8739.34	4916.09	4087.87	3979.15	4468.75	3991.27	5737.58	3131.97	2535.33	2643.83	3263.18	3647.85	-1.7777	-2.13787	-2.19628	-1.95566	-2.18961	-1.83194	-2.26305	-2.17018	-1.75828	-1.57287
Bra011981	AT2G28070.1	Symbols: | ABC-2 type transporter family protein | chr2:11956432-11959782 FORWARD LENGTH=730	681.486	1518.41	914.655	426.97	1031.96	1150.41	1193.77	1039.63	478.016	547.249	999.929	1215.76	2.22809	1.34215	-1.5961	1.51428	1.68809	-1.14826	-2.49734	-2.1814	-1.19385	1.01842
Bra016173	AT1G70940.1	Symbols: PIN3, ATPIN3 | Auxin efflux carrier family protein | chr1:26743170-26745871 FORWARD LENGTH=640	3533.95	2426.93	1952.57	3431.42	2575.61	3678.18	2965.37	1675.66	1426.25	1387.96	1797.49	1544.48	-1.45614	-1.8099	-1.02988	-1.37208	1.04081	-1.76967	-2.07914	-2.1365	-1.64973	-1.91998
Bra033067	AT3G28910.1	Symbols: ATMYB30, MYB30 | myb domain protein 30 | chr3:10911443-10912856 FORWARD LENGTH=323	912.349	641.136	628.289	806.765	704.393	837.756	725.302	437.67	303.572	340.613	430.231	487.474	-1.42302	-1.45212	-1.13087	-1.29523	-1.08904	-1.65719	-2.38923	-2.1294	-1.68584	-1.48788
Bra007542	AT3G60530.1	Symbols: GATA4 | GATA transcription factor 4 | chr3:22373348-22374147 FORWARD LENGTH=240	913.461	1009.44	899.589	1057.96	845.098	714.832	851.849	478.555	414.544	413.256	485.161	435.904	1.10507	-1.01542	1.15819	-1.08089	-1.27787	-1.78004	-2.05491	-2.06131	-1.75581	-1.95421
Bra027581	AT4G00970.1	Symbols: CRK41 | cysteine-rich RLK (RECEPTOR-like protein kinase) 41 | chr4:418437-421694 FORWARD LENGTH=665	1451.94	679.089	702.367	770.048	563.488	449.831	1408.52	779.424	659.56	669.182	753.501	1044.84	-2.13807	-2.06721	-1.88552	-2.5767	-3.22775	-1.80713	-2.13554	-2.10484	-1.8693	-1.34807
Bra034820	NA	NA	2725.1	2608.7	2201.48	2089.96	1717.12	1451.72	665.069	591.893	248.035	330.395	439.137	771.846	-1.04462	-1.23785	-1.3039	-1.58702	-1.87715	-1.12363	-2.68135	-2.01295	-1.51449	1.16055
Bra018334	AT2G30140.1	Symbols: | UDP-Glycosyltransferase superfamily protein | chr2:12872200-12873691 FORWARD LENGTH=455	509.443	245.062	260.21	357.838	636.717	1321.5	1120.49	672.949	526.58	303.265	393.784	844.396	-2.07883	-1.95781	-1.42367	1.24983	2.59401	-1.66504	-2.12786	-3.69476	-2.84544	-1.32697
Bra013353	AT4G18820.1	Symbols: | AAA-type ATPase family protein | chr4:10330371-10334090 FORWARD LENGTH=1097	4310.79	2058.01	1666.64	2612.17	2533.51	2919.63	3289.9	1701.02	1325.93	1532.54	1554.89	2101.93	-2.09464	-2.58652	-1.65027	-1.70151	-1.47649	-1.93407	-2.4812	-2.1467	-2.11584	-1.56518
Bra002775	AT5G56980.1	Symbols: | unknown protein; FUNCTIONS IN: molecular_function unknown; INVOLVED IN: biological_process unknown; LOCATED IN: endomembrane system; EXPRESSED IN: 18 plant structures; EXPRESSED DURING: 12 growth stages; BEST Arabidopsis thaliana protein match is: unknown protein (TAIR:AT4G26130.1); Has 30201 Blast hits to 17322 proteins in 780 species: Archae - 12; Bacteria - 1396; Metazoa - 17338; Fu…	2104.84	977.572	834.309	1191.93	1144.31	1572.63	2195.01	1116.77	887.154	1092.87	1040.26	1297.28	-2.15313	-2.52285	-1.76591	-1.8394	-1.33842	-1.9655	-2.47422	-2.00848	-2.11006	-1.69201
Bra030437	AT1G51500.1	Symbols: CER5, D3, ABCG12, WBC12, ATWBC12 | ABC-2 type transporter family protein | chr1:19097967-19100972 REVERSE LENGTH=687	3855.95	1584.81	1586.98	2044.11	2207.77	2409.14	2808.4	1973.91	1228.68	1361.47	1136.76	1483.09	-2.43307	-2.42974	-1.88637	-1.74654	-1.60055	-1.42276	-2.2857	-2.06277	-2.47053	-1.89361
Bra039235	AT2G24170.1	Symbols: | Endomembrane protein 70 protein family | chr2:10274307-10276894 REVERSE LENGTH=637	511.451	198.514	252.609	353.579	303.599	328.192	692.927	460.435	261.645	332.812	235.895	385.176	-2.5764	-2.02467	-1.4465	-1.68463	-1.55839	-1.50494	-2.64835	-2.08204	-2.93744	-1.79899
Bra035015	AT1G78170.1	Symbols: | unknown protein; BEST Arabidopsis thaliana protein match is: unknown protein (TAIR:AT1G22250.1); Has 66 Blast hits to 66 proteins in 11 species: Archae - 0; Bacteria - 0; Metazoa - 0; Fungi - 0; Plants - 66; Viruses - 0; Other Eukaryotes - 0 (source: NCBI BLink). | chr1:29414160-29414941 FORWARD LENGTH=221	10341.5	2704.11	2898.94	4603.52	6340.07	6695.91	3420.3	2071.47	1498.6	1599.44	1491.3	1805.54	-3.82436	-3.56734	-2.24643	-1.63113	-1.54445	-1.65115	-2.28233	-2.13844	-2.2935	-1.89434
Bra000330	AT2G43820.1	Symbols: GT, UGT74F2, ATSAGT1, SGT1, SAGT1 | UDP-glucosyltransferase 74F2 | chr2:18152279-18153715 FORWARD LENGTH=449	2979.07	1224.19	1165.93	1078.76	1018.93	1624.76	4105.66	2463.97	1815.88	1752.32	1957.76	2376.14	-2.4335	-2.5551	-2.76157	-2.92372	-1.83354	-1.66628	-2.26098	-2.34299	-2.09712	-1.72787
Bra020963	AT4G19410.1	Symbols: | Pectinacetylesterase family protein | chr4:10582188-10584766 REVERSE LENGTH=391	6349.14	2602.08	2228.13	2873.27	2415.22	3975.92	5891.83	3145.97	1967.36	2602.81	1877.15	3143.81	-2.44002	-2.84954	-2.20973	-2.6288	-1.5969	-1.87282	-2.99479	-2.26364	-3.13871	-1.8741
Bra004513	AT2G46720.1	Symbols: HIC, KCS13 | 3-ketoacyl-CoA synthase 13 | chr2:19198821-19200221 FORWARD LENGTH=466	892.486	288.478	393.979	333.151	370.001	464.96	897.139	577.514	272.618	340.635	345.785	569.531	-3.09377	-2.26531	-2.67892	-2.41212	-1.91949	-1.55345	-3.29083	-2.63373	-2.5945	-1.57522
Bra016906	AT2G41890.1	Symbols: | curculin-like (mannose-binding) lectin family protein / PAN domain-containing protein | chr2:17478058-17480352 REVERSE LENGTH=764	1173.54	434.301	359.209	543.015	546.209	686.551	901.969	505.098	439.09	395.223	435.396	526.729	-2.70214	-3.26701	-2.16116	-2.14852	-1.70933	-1.78573	-2.05418	-2.28218	-2.07161	-1.7124
Bra026868	AT1G13970.1	Symbols: | Protein of unknown function (DUF1336) | chr1:4779742-4781882 REVERSE LENGTH=504	2093.55	771.816	443.71	422.572	410.932	670.321	1681.84	876.498	693.322	520.933	517.116	960.212	-2.7125	-4.71828	-4.9543	-5.09464	-3.12321	-1.91882	-2.42577	-3.22851	-3.25235	-1.75153
Bra037302	AT2G16430.2	Symbols: PAP10, ATPAP10 | purple acid phosphatase 10 | chr2:7120502-7122772 REVERSE LENGTH=468	10256.5	2391.2	2374.3	2028.56	2132.18	2222.1	7679.84	4173.33	3280.42	3465.94	3154.54	4254.39	-4.28927	-4.3198	-5.05605	-4.81033	-4.61568	-1.84022	-2.34111	-2.2158	-2.43454	-1.80516
Bra009660	AT2G17120.1	Symbols: LYM2 | lysm domain GPI-anchored protein 2 precursor | chr2:7459156-7460648 FORWARD LENGTH=350	8578.1	4209.91	3997.44	3856.82	3733.59	4203.94	3265.67	1743.41	1292.04	1610.57	1573.82	1891.55	-2.0376	-2.1459	-2.22414	-2.29755	-2.04049	-1.87315	-2.52753	-2.02765	-2.075	-1.72645
Bra028112	AT1G65820.1	Symbols: | microsomal glutathione s-transferase, putative | chr1:24485213-24486682 FORWARD LENGTH=146	11882.8	4262.56	5359.8	5727.1	5547.23	5271.57	8526.43	5549.88	3992.42	3745.26	3516.22	4458.38	-2.78771	-2.21702	-2.07484	-2.14211	-2.25413	-1.53633	-2.13565	-2.27659	-2.42489	-1.91245
Bra033483	AT4G14440.1	Symbols: ATECI3, ECI3, HCD1 | 3-hydroxyacyl-CoA dehydratase 1 | chr4:8306946-8307662 REVERSE LENGTH=238	866.257	557.071	383.305	574.655	591.936	730.645	1020.95	518.444	409.274	423.72	420.195	600.008	-1.55502	-2.25997	-1.50744	-1.46343	-1.18561	-1.96926	-2.49454	-2.40949	-2.42971	-1.70156
Bra003867	AT1G72840.2	Symbols: | Disease resistance protein (TIR-NBS-LRR class) | chr1:27409504-27413485 REVERSE LENGTH=1183	2530.09	1287.37	993.616	794.981	791.924	735.839	3621.87	2001.26	1731.98	1649.05	1657.49	2045.4	-1.96532	-2.54635	-3.18258	-3.19486	-3.43837	-1.80979	-2.09117	-2.19634	-2.18515	-1.77074
Bra040680	AT2G19530.1	Symbols: | unknown protein; BEST Arabidopsis thaliana protein match is: unknown protein (TAIR:AT1G55160.2); Has 461 Blast hits to 346 proteins in 80 species: Archae - 0; Bacteria - 16; Metazoa - 89; Fungi - 28; Plants - 57; Viruses - 0; Other Eukaryotes - 271 (source: NCBI BLink). | chr2:8460219-8461486 FORWARD LENGTH=202	624.553	355.416	291.494	288.444	265.087	235.368	713.927	445.933	341.057	329.298	308.519	442.44	-1.75725	-2.14259	-2.16525	-2.35603	-2.65352	-1.60097	-2.09328	-2.16803	-2.31405	-1.61361
Bra032039	AT3G25020.1	Symbols: AtRLP42, RLP42 | receptor like protein 42 | chr3:9116868-9119540 REVERSE LENGTH=890	442.266	140.789	202.951	220.496	203.757	261.745	647.904	449.254	149.553	174.294	75.8847	395.54	1	1	1	1	1	-1.44218	-4.33227	-3.71731	-8.53801	-1.63802
Bra024220	AT4G28160.1	Symbols: | hydroxyproline-rich glycoprotein family protein | chr4:13980390-13980725 FORWARD LENGTH=111	282.626	315.452	240.314	359.994	339.436	367.052	902.047	584.727	377.936	399.682	258.284	490.064	1	1	1	1	1	-1.54268	-2.38677	-2.25691	-3.49246	-1.84067
Bra024269	AT5G64120.1	Symbols: | Peroxidase superfamily protein | chr5:25659551-25660946 REVERSE LENGTH=328	357.693	249.654	236.369	221.953	625.891	250.823	793.654	550.08	184.126	245.578	236.082	452.349	1	1	1	1.7498	1	-1.4428	-4.31039	-3.23178	-3.36177	-1.75452
Bra006964	AT5G44400.1	Symbols: | FAD-binding Berberine family protein | chr5:17886365-17888071 REVERSE LENGTH=537	477.645	316.192	364.46	341.284	232.663	438.319	563.09	372.618	237.922	250.767	176.682	297.072	1	1	1	1	1	-1.51117	-2.3667	-2.24547	-3.18703	-1.89547
Bra001573	AT3G14920.1	Symbols: | Peptide-N4-(N-acetyl-beta-glucosaminyl)asparagine amidase A protein | chr3:5018275-5020104 FORWARD LENGTH=609	1062.57	852.723	694.245	779.128	607.386	702.579	1465.89	840.929	578.774	663.31	494.506	738.422	-1.24609	-1.53054	-1.36379	-1.74941	-1.51239	-1.74318	-2.53275	-2.20996	-2.96435	-1.98517
Bra035654	NA	NA	179.302	106.498	139.394	122.167	200.091	509.164	500.16	407.872	165.886	210.725	173.787	358.74	1	1	1	1	2.8397	-1.22627	-3.01508	-2.37352	-2.87801	-1.39421
Bra001480	AT3G12977.1	Symbols: | NAC (No Apical Meristem) domain transcriptional regulator superfamily protein | chr3:4143832-4145860 FORWARD LENGTH=279	447.716	283.573	227.725	217.562	114.587	148.78	551.549	409.371	211.95	195.264	197.332	283.091	1	1	1	1	1	-1.34731	-2.60226	-2.82463	-2.79503	-1.94831
Bra034227	AT4G05460.1	Symbols: | RNI-like superfamily protein | chr4:2761106-2762400 REVERSE LENGTH=302	754.885	390.587	228.335	318.026	403.626	288.413	606.263	375.753	289.78	268.72	292.63	420.004	-1.93269	-3.30604	-2.37366	-1.87026	-2.61738	-1.61346	-2.09215	-2.25611	-2.07177	-1.44347
Bra034487	AT1G62305.1	Symbols: | Core-2/I-branching beta-1,6-N-acetylglucosaminyltransferase family protein | chr1:23026989-23029189 REVERSE LENGTH=378	425.673	269.18	279.599	317.68	221.34	208.059	693.552	387.099	281.062	327.017	273.86	364.941	1	1	1	1	1	-1.79167	-2.46761	-2.12084	-2.53251	-1.90045
Bra000215	AT2G41140.1	Symbols: CRK1, ATCRK1, ATCBK3 | CDPK-related kinase 1 | chr2:17150492-17153378 FORWARD LENGTH=576	1624.6	1327.72	1055.82	1398.46	1432.39	1715.3	1369.61	723.18	584.646	614.174	546.183	763.265	-1.2236	-1.53871	-1.16171	-1.13419	1.05583	-1.89387	-2.34263	-2.23	-2.5076	-1.79441
Bra010820	AT1G29670.1	Symbols: | GDSL-like Lipase/Acylhydrolase superfamily protein | chr1:10375843-10377717 FORWARD LENGTH=363	10198.4	9275.4	9093.2	8967.48	6820.73	8233.2	1297.09	1706.53	497.333	481.342	526.752	715.158	-1.09951	-1.12154	-1.13726	-1.49521	-1.23869	1.31566	-2.60809	-2.69474	-2.46243	-1.81371
Bra016939	AT2G41350.1	Symbols: | unknown protein; BEST Arabidopsis thaliana protein match is: unknown protein (TAIR:AT2G21980.1); Has 188 Blast hits to 188 proteins in 66 species: Archae - 0; Bacteria - 12; Metazoa - 90; Fungi - 15; Plants - 54; Viruses - 0; Other Eukaryotes - 17 (source: NCBI BLink). | chr2:17231565-17233458 FORWARD LENGTH=298	51.9081	147.146	149.747	167.164	162.826	419.739	616.928	541.125	286.255	270.663	251.454	378.126	1	1	1	1	1	-1.14008	-2.15517	-2.27932	-2.45344	-1.63154
Bra032378	AT1G30290.1	Symbols: | Tetratricopeptide repeat (TPR)-like superfamily protein | chr1:10670320-10672740 REVERSE LENGTH=806	477.775	331.641	279.286	301.99	251.579	287.434	741.128	437.639	318.364	319.533	306.313	384.593	1	1	1	1	1	-1.69347	-2.32793	-2.31941	-2.41951	-1.92704
Bra029975	AT3G49810.1	Symbols: | ARM repeat superfamily protein | chr3:18474936-18476282 REVERSE LENGTH=448	267.181	332.836	194.912	323.286	129.189	221.432	814.654	464.344	403.525	284.366	352.757	452.7	1	1	1	1	1	-1.75442	-2.01884	-2.86481	-2.30939	-1.79954
Bra025523	AT5G41070.1	Symbols: DRB5 | dsRNA-binding protein 5 | chr5:16438547-16439916 FORWARD LENGTH=393	1752.22	942.409	723.391	891.87	784.106	1178.29	1756.56	900.282	739.974	864.331	774.43	1108.81	-1.8593	-2.42223	-1.96466	-2.23467	-1.48709	-1.95112	-2.37381	-2.03228	-2.2682	-1.58418
Bra035290	AT5G02860.1	Symbols: | Pentatricopeptide repeat (PPR) superfamily protein | chr5:654102-656561 FORWARD LENGTH=819	2680.96	1365.81	1160.77	1474.47	1205.24	1085.04	1779.06	995.942	719.247	830.665	773.619	899.711	-1.96291	-2.30964	-1.81825	-2.22442	-2.47084	-1.78631	-2.4735	-2.14173	-2.29966	-1.97737
Bra019961	AT1G10140.1	Symbols: | Uncharacterised conserved protein UCP031279 | chr1:3322970-3323473 REVERSE LENGTH=167	4763.69	4417.65	3480.29	4095.67	3649.39	3939.35	4719.23	2486.04	1862.14	2283.32	2078.07	2992.32	-1.07833	-1.36876	-1.1631	-1.30534	-1.20926	-1.89829	-2.5343	-2.06683	-2.27097	-1.57711
Bra031702	AT1G10140.1	Symbols: | Uncharacterised conserved protein UCP031279 | chr1:3322970-3323473 REVERSE LENGTH=167	612.818	666.951	733.233	830.045	470.294	745.59	1005.33	537.718	420.585	490.228	443.119	672.137	1.08833	1.19649	1.35447	-1.30305	1.21666	-1.86962	-2.39031	-2.05074	-2.26876	-1.49572
Bra011780	AT4G37730.1	Symbols: AtbZIP7, bZIP7 | basic leucine-zipper 7 | chr4:17723800-17724717 FORWARD LENGTH=305	1288.84	694.775	703.594	602.044	673.732	643.733	1050.04	684.939	517.565	518.63	501.495	649.905	-1.85505	-1.8318	-2.14077	-1.91299	-2.00213	-1.53304	-2.02881	-2.02464	-2.09382	-1.61568
Bra023034	NA	NA	378.076	339.194	548.414	180.432	194.871	503.589	1005.75	513.03	260.706	181.404	444.054	806.466	1	1.45054	1	1	1.33198	-1.96041	-3.85779	-5.54425	-2.26493	-1.24711
Bra009810	AT5G25050.1	Symbols: | Major facilitator superfamily protein | chr5:8632022-8633828 FORWARD LENGTH=499	704.863	273.225	349.136	356.007	319.508	251.979	962.397	586.451	337.031	414.47	436.323	506.82	-2.57979	-2.01888	-1.97991	-2.20609	-2.79731	-1.64105	-2.85551	-2.32199	-2.2057	-1.89889
Bra012640	AT4G17790.1	Symbols: | SNARE associated Golgi protein family | chr4:9891425-9892675 FORWARD LENGTH=264	341.781	144.024	242.003	253.555	218.201	558.49	563.405	383.674	153.645	240.173	263.611	453.293	1	1	1	1	1.63406	-1.46845	-3.66693	-2.34583	-2.13726	-1.24292
Bra029983	AT3G49900.1	Symbols: | Phototropic-responsive NPH3 family protein | chr3:18500635-18502614 REVERSE LENGTH=517	296.838	231.794	250.321	223.684	203.757	344.655	720.924	360.745	266.34	253.877	342.59	410.134	1	1	1	1	1	-1.99843	-2.70678	-2.83966	-2.10433	-1.75778
Bra026511	AT3G25700.1	Symbols: | Eukaryotic aspartyl protease family protein | chr3:9358937-9360295 FORWARD LENGTH=452	1955.17	1943.36	1703.2	2563.75	2023.04	3514.2	1767.89	1512.64	877.581	872.583	859.947	1149.7	-1.00608	-1.14794	1.31127	1.03471	1.79739	-1.16874	-2.0145	-2.02604	-2.05581	-1.5377
Bra002442	AT5G22940.1	Symbols: F8H | FRA8 homolog | chr5:7677197-7678892 FORWARD LENGTH=469	1026.35	618.099	328.474	738	501.961	1040.88	891.22	721.993	333.867	377.024	425.035	556.266	-1.66049	-3.1246	-1.39072	-2.04468	1.01416	-1.23439	-2.66939	-2.36383	-2.09682	-1.60215
Bra036756	NA	NA	387.637	231.305	223.1	245.06	351.211	656.998	805.221	900.476	339.762	362.123	398.374	558.422	1	1	1	1	1.69488	1.1183	-2.36996	-2.22361	-2.02127	-1.44196
Bra036680	AT2G20370.1	Symbols: KAM1, MUR3 | Exostosin family protein | chr2:8792355-8794214 FORWARD LENGTH=619	7020.03	3286.4	3558.09	3697.87	3894.49	3617.21	7773.86	4495.24	3413.12	3633.28	2281.95	2977.01	-2.13609	-1.97298	-1.8984	-1.80255	-1.94073	-1.72935	-2.27764	-2.13963	-3.40667	-2.6113
Bra039456	AT3G05170.1	Symbols: | Phosphoglycerate mutase family protein | chr3:1466738-1468219 FORWARD LENGTH=316	934.661	454.941	625.528	669.693	813.887	886.674	1257.94	798.33	611.765	504.452	570.696	487.613	-2.05447	-1.4942	-1.39566	-1.14839	-1.05412	-1.57571	-2.05625	-2.49368	-2.20422	-2.57979
Bra021175	AT3G16400.1	Symbols: ATMLP-470, NSP1, ATNSP1 | nitrile specifier protein 1 | chr3:5566516-5568330 FORWARD LENGTH=470	519.498	229.865	281.466	261.424	292.936	313.831	757.793	411.838	313.118	241.962	216.355	318.628	-2.26001	-1.84569	-1.98719	-1.77342	-1.65534	-1.84003	-2.42015	-3.13187	-3.50254	-2.3783
Bra031787	AT1G11880.1	Symbols: | transferases, transferring hexosyl groups | chr1:4007909-4010327 REVERSE LENGTH=489	1250.31	493.173	749.923	762.622	684.961	861.967	1344.96	687.699	518.064	573.885	512.645	648.986	-2.53524	-1.66725	-1.63949	-1.82537	-1.45053	-1.95574	-2.59613	-2.34361	-2.62357	-2.0724
Bra025361	AT3G28910.1	Symbols: ATMYB30, MYB30 | myb domain protein 30 | chr3:10911443-10912856 FORWARD LENGTH=323	2520.48	1020.04	821.702	1870.48	1550.28	2346.53	1394.85	777.275	377.775	580.563	350.377	560.903	-2.47096	-3.06739	-1.3475	-1.62582	-1.07413	-1.79454	-3.69228	-2.40258	-3.981	-2.48679
Bra024385	AT5G65440.3	Symbols: | unknown protein; INVOLVED IN: biological_process unknown; EXPRESSED IN: 22 plant structures; EXPRESSED DURING: 13 growth stages; BEST Arabidopsis thaliana protein match is: unknown protein (TAIR:AT4G24610.1). | chr5:26152015-26156896 FORWARD LENGTH=1125	1811.34	756.446	787.804	1304.82	976.965	1432.97	690.836	375.812	332.059	185.173	140.637	296.849	-2.39454	-2.29923	-1.38819	-1.85405	-1.26405	-1.83825	-2.08046	-3.73076	-4.91219	-2.32723
Bra015827	AT1G75680.1	Symbols: AtGH9B7, GH9B7 | glycosyl hydrolase 9B7 | chr1:28417215-28419231 REVERSE LENGTH=525	12419	5610.81	6040.99	8046.39	8664.8	10007.6	14228.3	7798.71	6218.3	6417.53	5221.31	6416.06	-2.21341	-2.05579	-1.54343	-1.43327	-1.24096	-1.82444	-2.28813	-2.2171	-2.72504	-2.21761
Bra003439	AT3G61150.1	Symbols: HDG1, HD-GL2-1 | homeodomain GLABROUS 1 | chr3:22630769-22634875 FORWARD LENGTH=808	10119.7	4730.16	4986.73	5525.93	5980.52	5913.64	7624.52	4490.81	3476.03	3234.13	3529.61	3492.2	-2.1394	-2.02933	-1.83131	-1.69211	-1.71125	-1.69781	-2.19346	-2.35752	-2.16016	-2.1833
Bra018958	AT1G52260.1	Symbols: ATPDIL1-5, ATPDI3, PDI3, PDIL1-5 | PDI-like 1-5 | chr1:19460694-19463346 FORWARD LENGTH=537	3613.26	1663.88	1592.41	1615.4	1868.19	1847.95	4757.01	2386.03	1952.9	1557.82	1585.2	1795.01	-2.17159	-2.26905	-2.23676	-1.9341	-1.95528	-1.99369	-2.43587	-3.05363	-3.00089	-2.65013
Bra026425	AT4G26540.1	Symbols: | Leucine-rich repeat receptor-like protein kinase family protein | chr4:13394673-13398028 REVERSE LENGTH=1091	5157.99	2393.46	2184.84	2428.48	2600.22	2752.3	4526.84	2323.92	1321.97	1456.29	1341.09	1279.62	-2.15503	-2.36081	-2.12396	-1.98367	-1.87407	-1.94793	-3.42431	-3.10847	-3.37549	-3.53764
Bra013243	AT3G24770.1	Symbols: CLE41 | CLAVATA3/ESR-RELATED 41 | chr3:9046779-9047078 FORWARD LENGTH=99	1217.09	502.261	331.903	483.381	410.091	653.243	1098.46	583.665	490.629	539.108	362.571	451.128	-2.42322	-3.66701	-2.51787	-2.96785	-1.86315	-1.882	-2.23888	-2.03755	-3.02964	-2.43492
Bra027697	AT1G64380.1	Symbols: | Integrase-type DNA-binding superfamily protein | chr1:23890981-23891988 REVERSE LENGTH=335	2935.72	1335.93	1382.41	1420.64	1018.78	1528.15	4605.13	2598.05	1802.06	1661.86	1892.96	2252.3	-2.19751	-2.12362	-2.06648	-2.8816	-1.92109	-1.77253	-2.55548	-2.77107	-2.43277	-2.04463
Bra039148	AT3G01070.1	Symbols: ENODL16, AtENODL16 | early nodulin-like protein 16 | chr3:19659-20444 FORWARD LENGTH=167	576.341	157.859	211.19	212.756	212.766	555.344	1428.07	962.905	595.867	585.501	490.294	690.401	-3.65099	-2.72902	-2.70893	-2.7088	-1.03781	-1.48309	-2.39663	-2.43906	-2.91268	-2.06846
Bra024421	AT5G65810.1	Symbols: | unknown protein; BEST Arabidopsis thaliana protein match is: unknown protein (TAIR:AT3G49720.2); Has 30201 Blast hits to 17322 proteins in 780 species: Archae - 12; Bacteria - 1396; Metazoa - 17338; Fungi - 3422; Plants - 5037; Viruses - 0; Other Eukaryotes - 2996 (source: NCBI BLink). | chr5:26337833-26339144 REVERSE LENGTH=258	4161.45	1784.18	1917.68	1891.24	1737.96	2084.49	6914.82	4026.06	2603.88	2897.06	2196.84	2990.39	-2.33242	-2.17004	-2.20038	-2.39445	-1.99639	-1.71752	-2.65558	-2.38684	-3.14762	-2.31235
Bra002163	AT5G18500.1	Symbols: | Protein kinase superfamily protein | chr5:6139263-6141283 FORWARD LENGTH=484	11264.5	4523.22	3652.13	4155.83	4737.54	6427.51	10118.7	5272.06	3272.74	3002.75	2801.79	2463.68	-2.49037	-3.08436	-2.71053	-2.37771	-1.75254	-1.91931	-3.09181	-3.36981	-3.61151	-4.10715
Bra025280	AT4G27710.1	Symbols: CYP709B3 | cytochrome P450, family 709, subfamily B, polypeptide 3 | chr4:13828520-13830417 FORWARD LENGTH=518	1897.83	740.085	725.108	692.739	861.512	1061.48	2941.56	1736.23	1335.23	1453.45	1084.57	1147.26	-2.56434	-2.61731	-2.7396	-2.20291	-1.78791	-1.69422	-2.20304	-2.02385	-2.71219	-2.56399
Bra021151	AT3G48720.1	Symbols: | HXXXD-type acyl-transferase family protein | chr3:18046527-18049295 FORWARD LENGTH=430	1366.54	169.165	145.993	104.481	131.881	58.6554	1017.23	527.526	187.966	177.318	91.6703	72.1802	-8.07815	-9.36031	-13.0793	-10.3619	-23.2978	-1.9283	-5.41178	-5.73676	-11.0966	-14.0929
Bra012604	AT4G18340.1	Symbols: | Glycosyl hydrolase superfamily protein | chr4:10130245-10132019 REVERSE LENGTH=397	3577.6	1421.28	797.153	554.72	692.641	195.312	2850.08	1440.98	924.821	1033.58	822.957	393.007	-2.51717	-4.48797	-6.44938	-5.16516	-18.3174	-1.97788	-3.08176	-2.75748	-3.46322	-7.25198
Bra011776	AT4G37610.1	Symbols: BT5 | BTB and TAZ domain protein 5 | chr4:17670606-17671992 REVERSE LENGTH=368	2322.17	896.094	800.692	431.672	441.533	139.156	2137.42	1164.03	714.983	426.467	694.097	248.663	-2.59144	-2.9002	-5.37948	-5.25934	-16.6875	-1.83622	-2.98947	-5.01192	-3.07943	-8.59565
Bra029557	AT4G05120.1	Symbols: ENT3, FUR1, ATENT3 | Major facilitator superfamily protein | chr4:2632886-2634824 REVERSE LENGTH=418	7917.15	869.516	753.789	731.044	774.45	481.618	7191.89	3896.34	2623.27	2868.46	1586.54	1930.76	-9.10524	-10.5031	-10.8299	-10.2229	-16.4387	-1.84581	-2.74157	-2.50723	-4.53307	-3.7249
Bra036417	AT2G14080.1	Symbols: | Disease resistance protein (TIR-NBS-LRR class) family | chr2:5925225-5929600 FORWARD LENGTH=1215	3253.69	1123.58	1116.76	689.264	590.351	347.581	2410.07	1395.66	1125.48	915.97	524.778	467.795	-2.89582	-2.91351	-4.72053	-5.51145	-9.36095	-1.72683	-2.14137	-2.63117	-4.59255	-5.15198
Bra009826	AT5G25220.1	Symbols: KNAT3 | KNOTTED1-like homeobox gene 3 | chr5:8736208-8738115 FORWARD LENGTH=431	654.006	188.514	123.298	108.818	134.869	72.1345	528.794	295.915	213.386	222.563	195.183	100.704	-3.46927	-5.30427	-6.01009	-4.84919	-9.06648	-1.78698	-2.47811	-2.37593	-2.70922	-5.25097
Bra003998	AT1G69490.1	Symbols: NAP, ANAC029, ATNAP | NAC-like, activated by AP3/PI | chr1:26122233-26123222 FORWARD LENGTH=268	2151.82	747.576	582.673	410.278	450.421	244.359	4797.62	2718.79	1389.72	1372.58	1538.01	1251.55	-2.8784	-3.69301	-5.24479	-4.77735	-8.80598	-1.76462	-3.45222	-3.49533	-3.11937	-3.83334
Bra029370	AT5G23370.1	Symbols: | GRAM domain-containing protein / ABA-responsive protein-related | chr5:7863542-7864201 REVERSE LENGTH=219	1786.61	733.189	558.406	444.471	451.384	207.061	1701.71	975.053	651.066	715.229	582.153	477.332	-2.43677	-3.19948	-4.01963	-3.95807	-8.62842	-1.74525	-2.61373	-2.37925	-2.92313	-3.56504
Bra000651	NA	NA	1482.15	715.272	650.173	390.079	395.451	172.859	1831.83	1165.46	692	545.116	492.849	312.478	-2.07215	-2.27962	-3.79961	-3.748	-8.57433	-1.57177	-2.64715	-3.36044	-3.71682	-5.86227
Bra014722	AT3G55740.1	Symbols: PROT2, ATPROT2 | proline transporter 2 | chr3:20695786-20698157 FORWARD LENGTH=439	3491.97	825.602	922.795	745.732	685.829	410.461	3085.61	1678.45	1203.75	1189.28	1043.04	1131.18	-4.2296	-3.78412	-4.68261	-5.0916	-8.50743	-1.83837	-2.56333	-2.59452	-2.95829	-2.72778
Bra007913	AT1G70420.1	Symbols: | Protein of unknown function (DUF1645) | chr1:26539840-26540658 REVERSE LENGTH=272	1165	485.405	315.569	233.279	238.729	139.49	669.447	436.135	268.96	274.623	277.849	212.921	-2.40006	-3.69174	-4.99402	-4.88001	-8.35185	-1.53495	-2.48902	-2.43769	-2.40939	-3.14411
Bra019339	AT4G23030.1	Symbols: | MATE efflux family protein | chr4:12072857-12074365 FORWARD LENGTH=502	2320.11	499.471	327.34	379.766	357.284	298.623	1147.6	698.957	422.576	363.422	230.406	212.704	-4.64513	-7.08777	-6.10931	-6.49374	-7.76936	-1.64187	-2.71572	-3.15776	-4.98077	-5.39529
Bra008207	AT1G75580.1	Symbols: | SAUR-like auxin-responsive protein family | chr1:28377530-28377856 FORWARD LENGTH=108	3931.89	455.171	604.379	488.627	451.998	508.23	2359.18	1182.59	1085.39	996.622	448.726	454.22	-8.63827	-6.50567	-8.04681	-8.69891	-7.73644	-1.99493	-2.17358	-2.36718	-5.25751	-5.19391
Bra000336	AT5G34930.1	Symbols: | arogenate dehydrogenase | chr5:13233391-13235522 FORWARD LENGTH=640	1116.78	362.785	249.867	254.906	352.915	155.782	1883.12	961.7	731.674	815.164	392.793	595.338	-3.07835	-4.4695	-4.38114	-3.16444	-7.16886	-1.95812	-2.57371	-2.31011	-4.79418	-3.16311
Bra008058	NA	NA	716.624	197.815	152.665	116.08	81.4533	104.775	596.611	331.504	236.54	180.356	98.01	103.113	-3.6227	-4.69409	-6.17354	-8.79797	-6.83965	-1.79971	-2.52224	-3.30796	-6.08725	-5.78599
Bra004934	AT3G61150.1	Symbols: HDG1, HD-GL2-1 | homeodomain GLABROUS 1 | chr3:22630769-22634875 FORWARD LENGTH=808	1163.07	331.225	311.097	274.655	260.682	172.354	535.959	316.525	227.987	265.036	189.871	225.269	-3.51142	-3.73861	-4.23466	-4.46164	-6.74815	-1.69326	-2.35083	-2.02221	-2.82275	-2.3792
Bra026937	AT1G13080.1	Symbols: CYP71B2 | cytochrome P450, family 71, subfamily B, polypeptide 2 | chr1:4459212-4460807 FORWARD LENGTH=502	2945.83	913.93	570.305	565.966	590.915	445.856	897.599	453.302	226.951	302.554	315.804	322.381	-3.22326	-5.16536	-5.20496	-4.9852	-6.60713	-1.98013	-3.95503	-2.96674	-2.84227	-2.78428
Bra016133	AT1G71520.1	Symbols: | Integrase-type DNA-binding superfamily protein | chr1:26938612-26939043 FORWARD LENGTH=143	6966.41	2772.7	2683.77	1981.68	2359.54	1118.29	4052.54	2952.02	1676.39	1495.94	1264.49	518.582	-2.5125	-2.59576	-3.51541	-2.95244	-6.22952	-1.3728	-2.41742	-2.70903	-3.20488	-7.81466
Bra027597	NA	NA	3338.67	914.614	804.73	817.286	823.849	536.549	3312.25	1953.9	1061.08	1243.15	854.31	914.332	-3.65036	-4.14881	-4.08507	-4.05253	-6.22249	-1.6952	-3.12158	-2.6644	-3.87711	-3.62259
Bra019846	AT1G11545.1	Symbols: XTH8 | xyloglucan endotransglucosylase/hydrolase 8 | chr1:3878689-3880286 REVERSE LENGTH=305	1963.89	192.043	147.858	377.748	304.127	317.32	9029.34	5062.61	1698.01	2631.63	2006.72	1492.95	-10.2263	-13.2823	-5.19894	-6.45747	-6.18899	-1.78353	-5.3176	-3.43108	-4.49955	-6.04799
Bra004996	AT2G39980.1	Symbols: | HXXXD-type acyl-transferase family protein | chr2:16688437-16689885 REVERSE LENGTH=482	9036.06	2578.56	2644.85	2533.84	2989.11	1473.2	5308.28	2701.77	2471.77	2462.46	2332.78	2592.51	-3.5043	-3.41647	-3.56615	-3.02299	-6.13363	-1.96474	-2.14756	-2.15568	-2.27552	-2.04754
Bra024222	AT4G28140.1	Symbols: | Integrase-type DNA-binding superfamily protein | chr4:13974905-13975783 REVERSE LENGTH=292	1748.92	316.849	375.544	296.209	373.78	289.638	2060.33	1923.03	949.662	765.002	595.636	563.216	-5.51973	-4.65703	-5.90434	-4.67901	-6.0383	-1.0714	-2.16954	-2.69323	-3.45904	-3.65815
Bra033312	AT1G02310.1	Symbols: MAN1 | Glycosyl hydrolase superfamily protein | chr1:458243-460652 REVERSE LENGTH=411	1788.25	755.904	636.997	391.691	404.895	297.753	1987.81	1171.68	887.164	620.312	504.767	469.818	-2.36571	-2.80731	-4.56546	-4.41658	-6.00582	-1.69655	-2.24063	-3.20453	-3.93807	-4.23102
Bra029497	NA	NA	3003.16	1036.59	851.629	708.598	876.121	500.7	3200.39	1682.36	952.879	1209.79	922.442	975.965	-2.89715	-3.52637	-4.23817	-3.42779	-5.99792	-1.90232	-3.35865	-2.64541	-3.46948	-3.27921
Bra006592	AT5G21050.1	Symbols: | LOCATED IN: chloroplast; EXPRESSED IN: 14 plant structures; EXPRESSED DURING: 8 growth stages; CONTAINS InterPro DOMAIN/s: Hyccin (InterPro:IPR018619); BEST Arabidopsis thaliana protein match is: unknown protein (TAIR:AT5G64090.1); Has 206 Blast hits to 206 proteins in 60 species: Archae - 0; Bacteria - 0; Metazoa - 145; Fungi - 0; Plants - 50; Viruses - 0; Other Eukaryotes - 11 (sourc…	1779.53	519.003	517.999	525.718	464.633	300.063	910.753	478.372	319.639	275.28	234.599	239.934	-3.42875	-3.43539	-3.38495	-3.82997	-5.93052	-1.90386	-2.84932	-3.30846	-3.88217	-3.79585
Bra035175	AT1G80510.1	Symbols: | Transmembrane amino acid transporter family protein | chr1:30273100-30274569 FORWARD LENGTH=489	2032.79	478.544	428.622	459.04	370.33	356.294	1476.9	819.6	560.006	678.583	470.94	497.118	-4.24786	-4.74262	-4.42835	-5.48913	-5.70537	-1.80198	-2.63729	-2.17645	-3.13607	-2.97092
Bra012007	AT4G36480.1	Symbols: ATLCB1, LCB1, EMB2779, FBR11 | long-chain base1 | chr4:17218598-17221124 FORWARD LENGTH=482	1659.33	715.22	512.387	513.394	378.907	291.979	1771.5	1038.51	764.849	783.618	576.609	813.102	-2.32003	-3.23843	-3.23208	-4.37925	-5.68305	-1.70581	-2.31614	-2.26067	-3.07227	-2.17869
Bra011654	AT4G36010.1	Symbols: | Pathogenesis-related thaumatin superfamily protein | chr4:17039472-17040976 REVERSE LENGTH=301	3980.35	695.553	544.651	558.02	602.234	713.664	3796.25	2025.05	1511.38	1696.72	1070.76	977.067	-5.72257	-7.30807	-7.13299	-6.60931	-5.57734	-1.87465	-2.51178	-2.23741	-3.54538	-3.88535
Bra036224	NA	NA	7705.35	2777.4	1992.92	1594.67	1187.11	1383.17	6936.89	6010.22	3425.27	2778.49	2263.63	2565.16	-2.7743	-3.86636	-4.83194	-6.49085	-5.57079	-1.15418	-2.02521	-2.49664	-3.0645	-2.70427
Bra010839	AT1G29280.1	Symbols: WRKY65, ATWRKY65 | WRKY DNA-binding protein 65 | chr1:10236589-10237467 FORWARD LENGTH=259	6354.93	1524.79	1564.57	1260.14	1799.65	1172.8	5734.63	2949.96	2283.4	2795.21	2213.41	2327.39	-4.16774	-4.06177	-5.04303	-3.5312	-5.4186	-1.94397	-2.51144	-2.05159	-2.59086	-2.46397
Bra000046	AT2G38250.1	Symbols: | Homeodomain-like superfamily protein | chr2:16018384-16019500 FORWARD LENGTH=289	1493.18	537.857	649.293	468.601	540.283	277.812	1082.14	613.274	482.827	478.368	351.385	203.878	-2.77617	-2.2997	-3.18646	-2.7637	-5.37479	-1.76453	-2.24126	-2.26215	-3.07964	-5.30778
Bra019842	AT1G11630.1	Symbols: | Tetratricopeptide repeat (TPR)-like superfamily protein | chr1:3913168-3914385 REVERSE LENGTH=405	1156.8	507.434	458.339	336.233	356.54	219.03	3141	2333.55	1412.65	1541.38	1030.66	1091.94	-2.27971	-2.5239	-3.44047	-3.24452	-5.28147	-1.34602	-2.22348	-2.03778	-3.04756	-2.87653
Bra010814	AT1G29760.1	Symbols: | Putative adipose-regulatory protein (Seipin) | chr1:10422381-10424116 FORWARD LENGTH=526	2223.39	712.562	618.568	591.588	509.225	421.59	978.028	557.306	401.474	404.846	247.886	403.577	-3.12028	-3.59441	-3.75834	-4.36622	-5.27382	-1.75492	-2.43609	-2.4158	-3.94547	-2.4234
Bra033261	AT1G01480.1	Symbols: ACS2, AT-ACC2 | 1-amino-cyclopropane-1-carboxylate synthase 2 | chr1:175862-178051 FORWARD LENGTH=496	4323.77	1374.09	1571.93	1121.26	1007.41	823.097	3526.02	2776.24	1645.88	1294.94	1080.38	792.943	-3.14664	-2.75061	-3.85617	-4.29197	-5.25305	-1.27007	-2.14233	-2.72292	-3.26368	-4.44675
Bra000017	NA	NA	2719.23	896.053	1070.11	753.921	1016.2	533.071	863.232	641.08	420.635	407.469	294.795	244.587	-3.03468	-2.54108	-3.60678	-2.67588	-5.10107	-1.34653	-2.05221	-2.11852	-2.92825	-3.52935
Bra028769	AT3G44970.1	Symbols: | Cytochrome P450 superfamily protein | chr3:16432443-16434848 FORWARD LENGTH=479	848.174	309.325	255.849	160.183	87.8974	168.831	875.255	578.21	221.72	212.943	66.3396	110.874	-2.74202	-3.31514	-5.29503	-9.64959	-5.0238	-1.51373	-3.94757	-4.11028	-13.1936	-7.89414
Bra036810	AT3G51400.1	Symbols: | Arabidopsis protein of unknown function (DUF241) | chr3:19078086-19078919 REVERSE LENGTH=277	1754.9	402.772	419.78	460.385	576.088	352.377	1581.73	1040.54	618.229	561.483	555.411	457.678	-4.35706	-4.18052	-3.81181	-3.04624	-4.98018	-1.5201	-2.55849	-2.81706	-2.84786	-3.45599
Bra007371	AT3G57980.1	Symbols: | DNA-binding bromodomain-containing protein | chr3:21466919-21469148 REVERSE LENGTH=632	2362.89	1033.85	936.906	945.191	865.373	480.229	2210.65	1114.72	968.995	758.998	480.23	568.802	-2.28552	-2.52201	-2.49991	-2.73049	-4.92034	-1.98314	-2.28138	-2.91259	-4.60332	-3.8865
Bra023061	AT2G36320.1	Symbols: | A20/AN1-like zinc finger family protein | chr2:15229388-15229873 FORWARD LENGTH=161	11150.6	3485.09	3569.3	2880.64	3488.41	2274.37	9164.06	4909.13	3727.88	3391.46	2932.03	2638.38	-3.19952	-3.12403	-3.87088	-3.19647	-4.90272	-1.86674	-2.45825	-2.7021	-3.1255	-3.47337
Bra034196	AT4G03250.1	Symbols: | Homeodomain-like superfamily protein | chr4:1425050-1427744 FORWARD LENGTH=507	749.462	151.46	280.055	199.978	284.838	153.611	559.772	374.099	239.021	267.72	222.636	206.285	-4.94825	-2.67612	-3.74772	-2.63119	-4.87896	-1.49632	-2.34194	-2.09089	-2.51429	-2.71359
Bra023471	AT4G17700.1	Symbols: | unknown protein; BEST Arabidopsis thaliana protein match is: unknown protein (TAIR:AT4G17990.1); Has 30201 Blast hits to 17322 proteins in 780 species: Archae - 12; Bacteria - 1396; Metazoa - 17338; Fungi - 3422; Plants - 5037; Viruses - 0; Other Eukaryotes - 2996 (source: NCBI BLink). | chr4:9854322-9855227 FORWARD LENGTH=164	713.294	166.739	213.65	204.706	185.432	146.61	678.043	438.802	309.363	305.497	249.85	308.1	-4.27791	-3.33861	-3.48448	-3.84666	-4.86525	-1.54521	-2.19174	-2.21948	-2.7138	-2.20072
Bra016404	AT1G21830.1	Symbols: | unknown protein; CONTAINS InterPro DOMAIN/s: Protein of unknown function DUF740 (InterPro:IPR008004); BEST Arabidopsis thaliana protein match is: unknown protein (TAIR:AT1G44608.1); Has 49 Blast hits to 49 proteins in 12 species: Archae - 0; Bacteria - 0; Metazoa - 0; Fungi - 0; Plants - 49; Viruses - 0; Other Eukaryotes - 0 (source: NCBI BLink). | chr1:7661429-7662521 REVERSE LENGTH=2…	629.134	175.914	178.7	232.932	277.988	130.004	766.767	426.603	355.141	329.688	275.31	200.46	-3.57637	-3.52062	-2.70093	-2.26317	-4.83934	-1.79738	-2.15905	-2.32574	-2.7851	-3.82504
Bra001957	NA	NA	3334.86	1191.71	1605.45	1058.15	1278.7	692.1	1615.6	1398.97	686.062	793.534	733.599	670.43	-2.79838	-2.07721	-3.15159	-2.60801	-4.81847	-1.15485	-2.35489	-2.03596	-2.20229	-2.4098
Bra010802	AT1G30040.1	Symbols: ATGA2OX2, GA2OX2 | gibberellin 2-oxidase | chr1:10537769-10539570 FORWARD LENGTH=341	1497.8	408.358	234.336	425.054	259.863	313.543	989.932	668.316	485.109	359.692	293.599	252.09	-3.66786	-6.39168	-3.52379	-5.76381	-4.77702	-1.48123	-2.04064	-2.75217	-3.37171	-3.9269
Bra001740	AT3G19260.1	Symbols: LAG1 HOMOLOG 2, LOH2 | LAG1 homologue 2 | chr3:6669448-6671257 REVERSE LENGTH=296	1242.78	425.113	325.863	358.459	328.967	264.163	1291.76	704.008	439.087	579.5	378.031	375.96	-2.92341	-3.81381	-3.46701	-3.77783	-4.7046	-1.83487	-2.94192	-2.22909	-3.41707	-3.4359
Bra000799	AT4G04510.1	Symbols: CRK38 | cysteine-rich RLK (RECEPTOR-like protein kinase) 38 | chr4:2242122-2244656 FORWARD LENGTH=648	1481.69	688.785	639.575	598.029	437.34	329.1	1255.27	770.73	623.331	577.493	435.627	455.23	-2.15116	-2.31668	-2.47762	-3.38796	-4.50225	-1.62868	-2.01381	-2.17365	-2.88152	-2.75744
Bra037273	AT2G17420.1	Symbols: NTRA, ATNTRA, NTR2 | NADPH-dependent thioredoxin reductase A | chr2:7564357-7566219 FORWARD LENGTH=378	1137.36	531.233	445.054	416.246	418.07	254.09	1063.36	611.967	496.14	505.298	359.423	412.336	-2.14098	-2.55556	-2.73242	-2.7205	-4.47621	-1.73761	-2.14327	-2.10442	-2.95852	-2.57887
Bra019009	AT1G53035.1	Symbols: | unknown protein; FUNCTIONS IN: molecular_function unknown; INVOLVED IN: biological_process unknown; LOCATED IN: endomembrane system; EXPRESSED IN: 23 plant structures; EXPRESSED DURING: 13 growth stages; BEST Arabidopsis thaliana protein match is: unknown protein (TAIR:AT3G15358.1); Has 49 Blast hits to 49 proteins in 9 species: Archae - 0; Bacteria - 0; Metazoa - 0; Fungi - 0; Plants …	700.369	203.275	170.834	341.744	285.783	157.489	648.256	326.1	255.664	172.377	147.277	209.569	-3.44543	-4.0997	-2.0494	-2.4507	-4.4471	-1.98791	-2.53558	-3.76069	-4.40161	-3.09328
Bra018683	AT1G07710.1	Symbols: | Ankyrin repeat family protein | chr1:2386275-2387986 REVERSE LENGTH=543	1224.97	409.739	312.794	310.201	249.094	276.405	1272.46	667.507	570.589	492.202	523.867	493.966	-2.98963	-3.91622	-3.94896	-4.9177	-4.43179	-1.90629	-2.23008	-2.58524	-2.42898	-2.57601
Bra017853	AT4G37790.1	Symbols: HAT22 | Homeobox-leucine zipper protein family | chr4:17768241-17769272 FORWARD LENGTH=278	1952.67	840.977	794.044	678.887	707.835	440.912	1666.52	1024.83	623.563	632.145	534.73	397.249	-2.32191	-2.45915	-2.87628	-2.75865	-4.42871	-1.62614	-2.67258	-2.63629	-3.11656	-4.19515
Bra003490	AT3G62150.1	Symbols: PGP21 | P-glycoprotein 21 | chr3:23008755-23013579 REVERSE LENGTH=1296	2620.29	1158.95	1012.81	818.692	749.23	596.838	1313.39	763.096	597.636	502.729	408.182	320.192	-2.26092	-2.58715	-3.20058	-3.49731	-4.39029	-1.72113	-2.19764	-2.61252	-3.21766	-4.10188
Bra038486	AT4G16563.1	Symbols: | Eukaryotic aspartyl protease family protein | chr4:9329933-9331432 REVERSE LENGTH=499	13917.3	3149.33	3417.87	2848.65	3636.89	3176.75	21103.5	11378.9	9216.39	10441.8	6772.64	6514.98	-4.41913	-4.07192	-4.88558	-3.8267	-4.38099	-1.85462	-2.28978	-2.02106	-3.11599	-3.23923
Bra000263	AT2G42530.1	Symbols: COR15B | cold regulated 15b | chr2:17709191-17709873 REVERSE LENGTH=141	11335.6	4219.38	4187.04	3028.64	2675.63	2633.96	9621.15	6509.68	3756.37	4032.45	2133.23	2197.46	-2.68656	-2.70731	-3.7428	-4.23661	-4.30363	-1.47798	-2.56129	-2.38593	-4.51013	-4.3783
Bra002067	AT5G06860.1	Symbols: PGIP1, ATPGIP1 | polygalacturonase inhibiting protein 1 | chr5:2132373-2133434 FORWARD LENGTH=330	8198.62	2234.2	2504.12	2297.29	2145.75	1908.69	6541.03	3311.92	1981.57	2185.35	1338.58	1112.75	-3.6696	-3.27405	-3.56882	-3.82086	-4.29542	-1.975	-3.30093	-2.99313	-4.88654	-5.87826
Bra024087	AT1G65310.1	Symbols: ATXTH17, XTH17 | xyloglucan endotransglucosylase/hydrolase 17 | chr1:24257262-24258319 FORWARD LENGTH=282	11225.9	3590.02	3309.31	2778.07	2137.09	2641.02	10121.5	5140.5	3436.59	3039.61	3222.31	1762.23	-3.12697	-3.39222	-4.0409	-5.25289	-4.25059	-1.96897	-2.94522	-3.32987	-3.14107	-5.74357
Bra002286	AT5G20250.4	Symbols: DIN10 | Raffinose synthase family protein | chr5:6833730-6836635 FORWARD LENGTH=844	11241.1	4288.82	3893.79	2463.96	3369.71	2653.36	13007.1	6869.8	3689.37	3496.68	3658.5	1786.61	-2.62102	-2.88693	-4.56221	-3.33593	-4.23655	-1.89337	-3.52556	-3.71984	-3.55531	-7.28032
Bra003200	AT3G54920.1	Symbols: PMR6 | Pectin lyase-like superfamily protein | chr3:20345311-20348477 FORWARD LENGTH=501	1050.59	392.85	365.245	348.51	341.238	251.926	1113.76	591.219	444.931	461.248	289.525	381.441	-2.67428	-2.8764	-3.01452	-3.07876	-4.17023	-1.88384	-2.50322	-2.41467	-3.84685	-2.91987
Bra002135	AT5G18120.1	Symbols: ATAPRL7, APRL7 | APR-like 7 | chr5:5991385-5993696 FORWARD LENGTH=289	2493.08	727.697	716.005	690.542	645.441	599.061	2198.19	1117.19	804.016	1084.12	864.195	881.22	-3.42599	-3.48193	-3.61032	-3.8626	-4.16165	-1.96761	-2.73401	-2.02763	-2.54363	-2.49448
Bra016031	AT1G72830.1	Symbols: HAP2C, ATHAP2C, NF-YA3 | nuclear factor Y, subunit A3 | chr1:27405699-27407088 REVERSE LENGTH=340	3953.39	1802.72	1178.17	1002.41	1054.47	975.452	4614.92	2554.84	2118.59	1852.31	1644.42	2258.54	-2.19301	-3.35553	-3.94389	-3.74917	-4.05288	-1.80634	-2.1783	-2.49144	-2.80641	-2.04332
Bra021831	AT2G33170.1	Symbols: | Leucine-rich repeat receptor-like protein kinase family protein | chr2:14056371-14059829 REVERSE LENGTH=1124	1976.78	523.325	685.536	617.599	781.959	488.358	2220.04	1291.66	1102.28	1060.77	719.749	764.338	-3.77735	-2.88355	-3.20075	-2.52798	-4.04781	-1.71875	-2.01404	-2.09286	-3.08446	-2.90453
Bra040997	AT4G21920.1	Symbols: | unknown protein; FUNCTIONS IN: molecular_function unknown; INVOLVED IN: N-terminal protein myristoylation; LOCATED IN: cellular_component unknown; BEST Arabidopsis thaliana protein match is: unknown protein (TAIR:AT3G20340.1); Has 40 Blast hits to 40 proteins in 10 species: Archae - 0; Bacteria - 0; Metazoa - 0; Fungi - 0; Plants - 40; Viruses - 0; Other Eukaryotes - 0 (source: NCBI BL…	4007.03	1381.17	1435.43	1075.41	1544.24	1002.01	3210.01	2161.57	1324.71	1573.43	1336.88	1385.9	-2.90119	-2.79152	-3.72605	-2.59482	-3.99899	-1.48504	-2.42318	-2.04014	-2.40112	-2.31619
Bra011193	AT4G30430.1	Symbols: TET9 | tetraspanin9 | chr4:14879029-14880272 REVERSE LENGTH=272	1253.65	542.648	625.535	302.458	354.016	314.469	832.107	882.606	292.069	246.6	149.191	220.025	-2.31025	-2.00412	-4.14487	-3.54122	-3.98656	1.06069	-2.84901	-3.37432	-5.57746	-3.78187
Bra034660	AT4G34840.1	Symbols: ATMTN2, ATMTAN2, MTN2, MTAN2 | Phosphorylase superfamily protein | chr4:16606299-16607748 FORWARD LENGTH=254	1306.97	299.1	378.525	339.614	388.101	329.461	1663.8	855.147	700.626	664.409	454.457	500.831	-4.36968	-3.4528	-3.8484	-3.3676	-3.96699	-1.94563	-2.37473	-2.50418	-3.66107	-3.32208
Bra038324	AT1G69170.1	Symbols: | Squamosa promoter-binding protein-like (SBP domain) transcription factor family protein | chr1:26005626-26007041 FORWARD LENGTH=405	761.423	359.311	165.145	203.137	131.324	193.841	521.812	311.488	230.313	148.368	125.525	168.141	-2.11912	-4.61063	-3.74832	-5.79805	-3.92808	-1.67522	-2.26566	-3.51701	-4.15704	-3.10342
Bra021124	AT3G15650.1	Symbols: | alpha/beta-Hydrolases superfamily protein | chr3:5306006-5307764 FORWARD LENGTH=255	784.635	279.544	258.479	207.395	224.117	200.08	1060.62	701.006	529.089	445.983	341.117	312.164	-2.80684	-3.03559	-3.78329	-3.50101	-3.92161	-1.513	-2.00462	-2.37816	-3.10926	-3.39764
Bra010821	AT1G29660.1	Symbols: | GDSL-like Lipase/Acylhydrolase superfamily protein | chr1:10371955-10373624 FORWARD LENGTH=364	2319.38	1077.14	949.286	1078.79	594.148	593.537	2358.27	1449.17	770.891	898.376	561.16	566.87	-2.15328	-2.44329	-2.14998	-3.90371	-3.90773	-1.62732	-3.05915	-2.62504	-4.20249	-4.16016
Bra016754	AT1G12820.1	Symbols: AFB3 | auxin signaling F-box 3 | chr1:4368879-4370780 REVERSE LENGTH=577	2153.87	883.784	795.849	590.284	548.099	554.294	2728.63	1692.16	1200.85	995.115	924.303	843.349	-2.4371	-2.70638	-3.64887	-3.92971	-3.88579	-1.61251	-2.27225	-2.74202	-2.95209	-3.23547
Bra028211	NA	NA	2127.86	816.748	945.237	846.687	545.805	557.59	1465.38	754.673	612.245	632.026	419.618	353.823	-2.60528	-2.25114	-2.51316	-3.89857	-3.81617	-1.94174	-2.39345	-2.31854	-3.49218	-4.14156
Bra015630	AT1G78100.1	Symbols: | F-box family protein | chr1:29387907-29388911 FORWARD LENGTH=334	2183.72	775.37	834.055	886.369	894.72	578.643	2075.43	1299.79	887.719	1006.96	884.892	1017.86	-2.81636	-2.6182	-2.46367	-2.44067	-3.77386	-1.59674	-2.33794	-2.06108	-2.3454	-2.03901
Bra001149	AT3G05490.1	Symbols: RALFL22 | ralf-like 22 | chr3:1591381-1591740 FORWARD LENGTH=119	9881.31	2933.33	2758.5	2812.84	2420.73	2653.45	7928.15	4115.76	2592.32	3492.8	1930.71	2291.59	-3.36863	-3.58213	-3.51293	-4.08195	-3.72395	-1.92629	-3.05832	-2.26986	-4.10634	-3.45967
Bra003212	AT3G55430.1	Symbols: | O-Glycosyl hydrolases family 17 protein | chr3:20549806-20552004 REVERSE LENGTH=449	8017.79	3516.22	3010.52	2137.98	1865.95	2161.85	9951.2	5490.35	3903.11	4636.7	2894.12	3661.31	-2.28023	-2.66326	-3.75017	-4.29689	-3.70876	-1.81249	-2.54956	-2.14618	-3.43842	-2.71793
Bra001633	AT3G16490.1	Symbols: IQD26 | IQ-domain 26 | chr3:5603962-5605489 REVERSE LENGTH=389	953.692	312.711	316.6	237.338	343.119	258.377	771.378	547.004	297.865	272.765	301.098	298.071	-3.04976	-3.01229	-4.01829	-2.77948	-3.69109	-1.41019	-2.58969	-2.82799	-2.56188	-2.5879
[truncated: 1,883 more rows]
